# Supplementary material for: Low-frequency variation in TP53 has large effects on head circumference and intracranial volume
Source: Nat Commun. 2019 Jan 21;10:357. doi: 10.1038/s41467-018-07863-x (PMC6341110; doi:10.1038/s41467-018-07863-x)
Supplement: Supplementary file 6 — Supplementary Data 3 [file 41467_2018_7863_MOESM6_ESM.xlsx]

## Sheet: Sheet1
HC (Pediatric+adult) meta-analysis: Independent single variants (p < 1.0E-04)
SNP	Chr	Position (b37)	EA	EAF	β	SE	p	N	phet
1:26479253	1	26479253	a	0.01	0.44	0.10	6.1E-06	11537	6.1E-01		Independent SNPs, LD: r2< 0.2 within +/- 500 kb
1:18824654	1	18824654	a	0.99	0.38	0.08	6.1E-06	13226	6.6E-01
rs66615834	1	247846761	a	0.38	0.05	0.01	6.7E-06	18881	8.7E-01
rs77295005	1	80167991	t	0.99	0.23	0.05	6.7E-06	17179	1.7E-01
1:31543894	1	31543894	t	0.01	-0.32	0.07	8.8E-06	15827	3.3E-01
rs2345282	1	243739970	c	0.18	0.06	0.01	1.1E-05	18881	7.9E-01
rs9435811	1	229309538	c	0.47	0.05	0.01	1.6E-05	18881	7.9E-02
rs7526484	1	22451845	t	0.24	0.05	0.01	2.0E-05	18881	4.4E-01
rs1028665	1	232056301	a	0.83	0.06	0.01	2.1E-05	18881	4.7E-01
rs147591756	1	164991082	a	0.97	-0.15	0.04	2.2E-05	18881	2.5E-01
rs3116860	1	25203009	t	0.34	-0.05	0.01	2.4E-05	18881	3.2E-02
1:44750447	1	44750447	a	0.01	0.39	0.09	2.6E-05	9928	6.4E-01
rs834997	1	100111956	a	0.70	-0.05	0.01	2.6E-05	18881	4.1E-02
rs2935211	1	213110556	t	0.53	0.04	0.01	2.7E-05	18881	2.0E-01
1:86934014	1	86934014	a	0.00	0.51	0.12	2.8E-05	8145	7.3E-02
rs55720217	1	28277072	t	0.25	-0.05	0.01	3.3E-05	18881	4.2E-01
rs145837733	1	4334552	t	0.01	0.30	0.07	3.8E-05	13226	1.3E-01
rs147717560	1	223509452	t	0.02	-0.30	0.07	4.1E-05	10983	2.3E-01
rs4418594	1	111825261	a	0.40	-0.04	0.01	4.2E-05	18881	6.0E-01
rs148794102	1	235675584	a	0.04	0.13	0.03	5.1E-05	17529	5.7E-02
rs12128360	1	6986902	a	0.06	0.09	0.02	5.2E-05	18881	6.2E-01
1:182354890	1	182354890	t	0.01	0.37	0.09	5.3E-05	13104	3.9E-02
1:171690036	1	171690036	t	1.00	0.43	0.11	5.6E-05	10234	3.9E-01
rs1891062	1	214083466	t	0.35	0.05	0.01	5.8E-05	18881	6.6E-01
rs115163509	1	161253859	a	0.01	-0.32	0.08	6.0E-05	13226	8.9E-01
rs72741008	1	209846341	t	0.08	0.09	0.02	6.1E-05	17826	9.5E-01
1:171670579	1	171670579	a	0.99	0.42	0.10	6.1E-05	10234	1.4E-01
1:19127691	1	19127691	a	0.99	-0.59	0.15	6.4E-05	6077	2.0E-01
rs17140119	1	229238331	a	0.60	-0.04	0.01	6.5E-05	18881	2.4E-01
rs67347362	1	235259370	t	0.16	0.06	0.01	6.7E-05	18881	9.3E-01
1:171738961	1	171738961	a	1.00	0.43	0.11	7.4E-05	10234	3.6E-01
1:26508566	1	26508566	t	0.01	0.44	0.11	7.7E-05	10234	5.1E-01
1:36316881	1	36316881	c	1.00	0.56	0.14	7.8E-05	8145	1.0E+00
1:20139579	1	20139579	a	0.00	-0.54	0.14	8.0E-05	10161	2.7E-01
rs11577302	1	151141213	a	0.19	-0.05	0.01	8.5E-05	18881	4.9E-01
1:59971893	1	59971893	c	0.00	0.63	0.16	8.8E-05	6383	9.4E-01
rs72766196	1	229326054	a	0.95	-0.11	0.03	8.8E-05	17826	6.6E-01
rs1926867	1	183955742	t	0.17	0.05	0.01	8.9E-05	18881	3.4E-01
1:162298007	1	162298007	c	0.99	0.50	0.13	8.9E-05	5773	1.7E-01
rs4845812	1	5707816	t	0.32	-0.05	0.01	9.3E-05	18881	6.0E-01
1:237265932	1	237265932	a	0.02	-0.30	0.08	9.4E-05	10983	5.8E-01
rs76361015	1	48217341	a	0.04	-0.13	0.03	1.0E-04	18881	3.2E-01
rs79576701	2	183704659	t	0.91	-0.11	0.02	1.6E-08	18881	4.0E-01
rs41288837	2	85531116	t	0.03	-0.16	0.03	1.6E-06	17737	4.4E-02
rs61570189	2	207264555	c	0.28	0.06	0.01	2.1E-06	18881	6.2E-01
2:132657196	2	132657196	a	0.00	-0.77	0.17	4.0E-06	6358	4.8E-02
rs142061173	2	206884295	c	0.04	0.14	0.03	4.3E-06	17738	8.5E-01
2:85544631	2	85544631	t	0.02	-0.25	0.06	5.2E-06	13785	8.4E-01
2:175867638	2	175867638	a	0.01	-0.34	0.07	5.9E-06	15827	9.7E-01
rs116597003	2	125656363	a	0.98	-0.21	0.05	8.7E-06	17441	5.3E-01
rs138706496	2	230025041	a	0.02	-0.21	0.05	9.4E-06	18288	7.3E-01
2:199659842	2	199659842	c	1.00	-0.53	0.12	1.1E-05	11923	3.9E-03
rs78215374	2	33580769	t	0.02	-0.20	0.05	1.4E-05	17233	1.2E-02
rs7583237	2	66079084	a	0.90	-0.08	0.02	1.8E-05	18881	2.0E-01
2:109125446	2	109125446	a	1.00	0.59	0.14	1.9E-05	6997	7.9E-01
rs75905710	2	233734064	t	0.02	0.18	0.04	2.0E-05	17529	1.7E-01
2:209566150	2	209566150	a	0.01	-0.41	0.10	2.5E-05	10840	8.7E-01
rs6716080	2	42261813	t	0.65	-0.05	0.01	2.6E-05	18881	6.6E-01
rs75574593	2	33579554	a	0.98	0.27	0.06	2.6E-05	10003	8.0E-02
rs4444526	2	85552709	t	0.48	-0.04	0.01	2.6E-05	18881	3.1E-01
2:85555139	2	85555139	t	0.02	-0.24	0.06	3.0E-05	12096	8.7E-01
rs111684944	2	34506300	a	0.02	0.17	0.04	3.5E-05	18881	4.7E-01
2:69503310	2	69503310	t	0.01	0.33	0.08	3.6E-05	14281	9.6E-01
2:19959283	2	19959283	t	0.01	-0.27	0.07	3.6E-05	13226	5.4E-01
2:59913923	2	59913923	a	0.00	-0.59	0.14	3.7E-05	8166	5.8E-01
2:181137404	2	181137404	a	0.99	-0.38	0.09	3.7E-05	13226	8.3E-01
rs12986742	2	58975143	t	0.54	-0.04	0.01	3.7E-05	18881	5.2E-01
rs80151277	2	62115880	a	0.02	-0.22	0.05	4.3E-05	14632	8.9E-01
rs1159257	2	180133167	a	0.81	0.06	0.01	4.7E-05	18881	2.7E-01
2:69569087	2	69569087	c	0.99	-0.35	0.09	4.7E-05	12286	9.9E-01
2:156318791	2	156318791	t	0.99	0.51	0.13	4.8E-05	5540	1.0E-01
2:66413673	2	66413673	a	0.99	-0.42	0.10	4.9E-05	11305	2.7E-01
rs182548767	2	128047760	a	0.04	-0.24	0.06	5.5E-05	6383	5.9E-01
rs189368643	2	220594726	c	0.99	0.43	0.11	5.6E-05	9834	6.2E-01
2:238878704	2	238878704	a	0.98	0.26	0.06	5.6E-05	13951	7.0E-01
2:241309235	2	241309235	a	0.01	-0.56	0.14	5.7E-05	5418	5.7E-01
rs190798606	2	158256281	a	0.99	-0.30	0.07	6.0E-05	12935	2.3E-01
2:69619510	2	69619510	a	0.99	-0.35	0.09	6.1E-05	12286	9.7E-01
2:50782944	2	50782944	a	0.99	-0.53	0.13	6.3E-05	8239	8.6E-02
rs13002880	2	46708129	c	0.59	-0.04	0.01	6.5E-05	18881	5.5E-02
rs116200456	2	19949443	a	0.01	-0.26	0.06	6.7E-05	13226	7.0E-01
rs148404445	2	113995793	t	0.01	0.39	0.10	7.0E-05	8894	7.7E-01
rs114697149	2	57886839	a	0.02	-0.15	0.04	7.1E-05	18881	3.7E-01
rs66471729	2	236516472	t	0.24	-0.05	0.01	7.1E-05	18881	9.4E-01
rs13409184	2	208093232	t	0.05	-0.10	0.02	7.3E-05	18881	2.5E-01
rs186670214	2	46948766	c	0.01	-0.25	0.06	7.4E-05	14793	6.4E-01
2:108872183	2	108872183	c	0.99	0.36	0.09	7.5E-05	10295	1.3E-01
rs145247880	2	23091477	t	0.01	-0.31	0.08	7.6E-05	16882	2.9E-01
2:142009789	2	142009789	a	0.02	0.24	0.06	7.7E-05	8992	9.4E-01
rs41280583	2	99135812	c	0.99	0.29	0.07	8.0E-05	15193	8.8E-01
2:227344152	2	227344152	a	0.01	-0.39	0.10	8.0E-05	9448	8.7E-01
2:36048812	2	36048812	a	0.00	0.66	0.17	8.0E-05	5540	6.3E-01
2:161869638	2	161869638	a	0.98	0.32	0.08	8.2E-05	7230	6.6E-01
2:191033941	2	191033941	a	0.00	-0.64	0.16	8.3E-05	6150	1.7E-01
rs66894912	2	129048939	t	0.11	-0.07	0.02	8.3E-05	18881	8.4E-01
2:139411639	2	139411639	a	0.01	-0.47	0.12	8.5E-05	9078	8.8E-01
2:120343256	2	120343256	t	0.01	0.58	0.15	8.7E-05	7438	8.7E-01
2:19609717	2	19609717	a	0.01	0.42	0.11	9.6E-05	11984	7.2E-01
rs191591089	2	66864855	t	0.01	-0.27	0.07	9.7E-05	15827	2.7E-01
rs145959105	2	175089196	a	0.99	0.20	0.05	9.8E-05	17233	2.7E-01
rs77490311	2	41118737	t	0.95	-0.10	0.03	9.8E-05	18881	2.6E-01
2:85710031	2	85710031	t	0.02	-0.22	0.06	9.9E-05	13785	5.3E-01
rs4671260	2	56026374	t	0.64	0.04	0.01	9.9E-05	18881	5.4E-01
rs115067791	2	207033306	a	0.06	0.09	0.02	1.0E-04	18881	5.1E-01
3:147516620	3	147516620	a	0.99	-0.42	0.09	8.5E-06	12770	6.9E-01
3:147513385	3	147513385	a	0.99	-0.41	0.09	9.0E-06	12770	7.0E-01
rs35671868	3	25640522	t	0.96	-0.14	0.03	9.5E-06	17826	1.6E-02
rs6784404	3	141073675	a	0.40	0.05	0.01	1.9E-05	18881	6.2E-01
rs17036228	3	3784734	a	0.06	0.10	0.02	2.4E-05	18881	9.9E-02
rs7612364	3	126006518	a	0.47	-0.04	0.01	2.7E-05	18881	5.4E-01
3:171620657	3	171620657	c	0.00	0.63	0.15	2.8E-05	8992	5.0E-01
rs73857562	3	114451705	a	0.94	0.10	0.02	4.0E-05	18881	7.4E-01
rs6776884	3	34010566	a	0.05	-0.11	0.03	4.2E-05	18881	5.3E-01
3:93850612	3	93850612	t	1.00	-0.61	0.15	4.2E-05	5446	1.3E-01
rs9290484	3	173627617	t	0.78	0.05	0.01	4.3E-05	18881	5.3E-01
rs75234259	3	138343074	a	1.00	0.62	0.15	4.4E-05	8166	8.3E-01
rs353091	3	15194949	t	0.31	0.05	0.01	4.8E-05	18881	7.1E-01
rs112230831	3	84916603	a	0.86	0.08	0.02	4.9E-05	10047	3.0E-01
rs78304575	3	184069995	a	0.01	0.30	0.07	5.5E-05	14281	6.1E-01
3:102391066	3	102391066	a	0.01	0.32	0.08	5.6E-05	16386	9.6E-01
3:123369672	3	123369672	a	1.00	0.77	0.19	5.6E-05	6989	9.1E-02
rs12491472	3	68936483	a	0.15	-0.06	0.01	6.5E-05	18881	4.9E-02
rs1661521	3	3751794	a	0.24	0.05	0.01	6.6E-05	18881	6.3E-01
3:61006981	3	61006981	a	0.01	-0.54	0.14	8.3E-05	7205	7.9E-01
3:44789080	3	44789080	c	1.00	-0.59	0.15	8.8E-05	8145	9.2E-01
rs73148972	3	145846073	t	0.06	0.09	0.02	9.1E-05	18881	9.1E-01
rs9864495	3	9305364	t	0.99	-0.32	0.08	9.8E-05	12489	2.0E-01
rs148541282	3	167123547	t	0.99	0.22	0.06	9.9E-05	17441	8.0E-01
rs16859916	3	112372256	t	0.01	-0.38	0.10	1.0E-04	7588	6.4E-01
rs151039121	4	128608983	c	0.98	-0.25	0.05	1.2E-07	18881	7.3E-02
rs7674220	4	106148758	c	0.62	-0.05	0.01	3.4E-06	18881	2.2E-01
rs67465980	4	127948626	a	0.21	0.06	0.01	7.5E-06	18881	7.7E-01
4:172086259	4	172086259	a	0.00	-0.58	0.13	8.7E-06	8145	5.1E-01
4:57886159	4	57886159	a	0.99	0.38	0.09	9.4E-06	13682	4.8E-01
rs75129112	4	180037243	a	0.97	-0.28	0.06	9.5E-06	5540	2.1E-01
rs116036335	4	101073327	t	0.01	-0.32	0.07	1.2E-05	15827	6.3E-01
rs143529501	4	8618407	a	0.01	-0.30	0.07	1.7E-05	16138	1.1E-01
rs142621055	4	127952224	a	0.02	0.19	0.04	1.8E-05	18584	6.2E-02
rs2970848	4	23817027	a	0.68	0.05	0.01	1.8E-05	18881	7.9E-01
rs17501494	4	105997534	t	0.04	0.12	0.03	1.9E-05	18881	6.1E-01
4:143369026	4	143369026	t	1.00	0.52	0.12	2.0E-05	10440	5.5E-01
4:57789701	4	57789701	t	0.01	-0.35	0.08	2.6E-05	13682	2.6E-01
rs13121093	4	53395308	a	0.91	-0.08	0.02	3.7E-05	18881	9.2E-01
4:57923441	4	57923441	a	0.01	-0.35	0.09	4.0E-05	13682	6.5E-01
4:37068100	4	37068100	a	0.01	-0.47	0.12	4.9E-05	8751	1.8E-01
rs35419108	4	112111750	t	0.97	0.16	0.04	5.2E-05	17826	2.3E-01
4:174530062	4	174530062	a	0.00	-0.68	0.17	5.3E-05	6383	8.1E-01
4:128608184	4	128608184	t	0.01	0.60	0.15	6.3E-05	6383	1.4E-01
rs78688570	4	28079041	t	0.13	0.07	0.02	6.8E-05	18881	7.3E-01
rs117087123	4	58587232	a	0.00	0.50	0.13	7.1E-05	10234	6.6E-01
rs115634775	4	26702526	t	0.06	0.12	0.03	7.2E-05	12731	1.1E-01
4:106145142	4	106145142	a	0.01	-0.64	0.16	7.4E-05	5235	8.9E-01
rs4349616	4	126310531	a	0.42	0.05	0.01	7.5E-05	12731	7.3E-01
4:79972766	4	79972766	t	0.00	-0.50	0.13	7.7E-05	10234	7.8E-01
rs77061989	4	183454	a	0.96	0.12	0.03	8.4E-05	18026	7.2E-01
rs297270	4	27729448	t	0.54	0.04	0.01	8.8E-05	18881	9.6E-01
4:67995075	4	67995075	a	0.99	0.57	0.14	9.5E-05	5235	6.6E-01
rs34004000	4	57126068	t	0.54	0.04	0.01	1.0E-04	18881	3.4E-01
rs59824589	4	57125928	a	0.54	0.04	0.01	1.0E-04	18881	3.3E-01
rs13170536	5	39090374	t	0.23	0.06	0.01	6.6E-07	18881	4.1E-01
rs2237076	5	139720831	t	0.27	-0.06	0.01	2.7E-06	18881	9.7E-01
rs2563331	5	140025752	t	0.20	-0.06	0.01	2.8E-06	18881	5.9E-01
rs75438586	5	83204134	t	0.01	0.32	0.07	4.0E-06	15579	7.2E-01
5:75232708	5	75232708	a	0.99	0.62	0.14	6.8E-06	6721	2.3E-02
rs72810783	5	115772168	a	0.03	0.14	0.03	7.6E-06	18881	4.2E-01
rs6879356	5	178513411	a	0.32	0.06	0.01	1.3E-05	12731	7.5E-01
5:75232629	5	75232629	a	0.01	-0.56	0.13	1.9E-05	6721	9.5E-03
5:132122649	5	132122649	c	1.00	-0.81	0.19	2.0E-05	6477	2.1E-01
rs151244051	5	39334398	c	0.76	-0.07	0.02	2.2E-05	10047	6.0E-01
rs10471639	5	64048451	t	0.71	-0.07	0.02	2.2E-05	10130	1.1E-01
rs4976339	5	136440530	a	0.32	0.05	0.01	2.5E-05	18881	7.6E-01
5:62591973	5	62591973	t	0.01	0.28	0.07	3.2E-05	13226	5.8E-01
rs2059776	5	178539400	t	0.31	0.07	0.02	3.6E-05	8834	6.4E-01
rs76946570	5	126703618	t	0.96	0.12	0.03	4.0E-05	18881	8.1E-01
rs191009295	5	123215814	a	0.99	0.30	0.07	4.2E-05	16040	7.9E-01
rs141367846	5	1763590	a	0.98	-0.20	0.05	5.2E-05	15687	7.3E-01
rs115406185	5	123869863	a	0.06	-0.10	0.02	5.7E-05	18881	6.7E-01
5:142626622	5	142626622	a	0.01	-0.51	0.13	6.0E-05	5745	3.4E-01
rs62353935	5	29025746	a	0.89	-0.07	0.02	6.1E-05	18881	1.8E-01
rs62369779	5	32984219	t	0.96	-0.12	0.03	6.2E-05	16979	2.5E-01
rs144350462	5	24331604	a	0.99	-0.22	0.05	6.5E-05	18288	1.5E-01
rs116000354	5	95170623	c	0.90	-0.07	0.02	6.6E-05	18881	7.2E-01
5:56953421	5	56953421	a	0.01	-0.40	0.10	6.6E-05	10047	5.2E-02
rs6861437	5	115604241	a	0.66	0.07	0.02	7.0E-05	8285	4.3E-01
5:52063220	5	52063220	a	0.99	-0.38	0.10	7.0E-05	11537	2.2E-01
5:105562614	5	105562614	t	0.00	-0.48	0.12	7.5E-05	10767	4.9E-01
rs3822730	5	171174254	c	0.53	-0.04	0.01	7.8E-05	18881	1.0E-01
rs175086	5	139543091	a	0.54	0.04	0.01	7.9E-05	18881	4.4E-01
5:164501026	5	164501026	a	0.22	-0.07	0.02	8.0E-05	10047	5.7E-01
rs145385536	5	43241724	a	0.02	-0.16	0.04	8.1E-05	17529	3.5E-01
rs191480620	5	62592769	a	0.01	0.26	0.07	8.2E-05	13226	5.5E-01
rs113383618	5	135023723	c	0.99	-0.41	0.10	8.2E-05	5443	4.6E-01
rs11748486	5	178278709	a	0.32	-0.05	0.01	8.4E-05	18881	3.9E-01
rs12109893	5	34862348	t	0.84	0.06	0.02	8.7E-05	18881	2.2E-01
rs62376881	5	168578158	a	0.02	0.15	0.04	9.4E-05	18881	5.1E-01
rs251376	5	140253689	a	0.50	0.04	0.01	9.4E-05	18881	4.5E-01
rs10074160	5	164509574	a	0.21	-0.08	0.02	9.6E-05	8285	2.6E-01
rs12520550	5	28163673	a	0.81	-0.05	0.01	9.7E-05	18881	9.6E-01
rs4422515	5	72587455	t	0.59	-0.04	0.01	9.9E-05	18881	2.4E-01
5:63950547	5	63950547	a	0.98	-0.26	0.07	1.0E-04	11923	3.5E-01
rs1862176	5	139730444	a	0.69	0.04	0.01	1.0E-04	18881	6.1E-01
rs9268812	6	32424568	a	0.35	0.07	0.01	1.3E-09	18881	8.5E-01
rs11757660	6	31364035	t	0.70	0.06	0.01	2.9E-08	18881	1.7E-01
rs9265961	6	31315501	a	0.31	0.06	0.01	3.4E-08	18881	3.4E-01
rs73763159	6	108991686	t	0.10	-0.10	0.02	5.6E-08	18881	9.2E-01
rs2802295	6	108926496	a	0.39	-0.06	0.01	7.9E-08	18881	1.9E-01
rs3135377	6	32385399	a	0.23	0.07	0.01	1.0E-07	18881	5.6E-01
rs2095242	6	127217492	t	0.88	-0.09	0.02	1.0E-07	18881	7.9E-01
rs2857212	6	32740411	a	0.65	0.07	0.01	3.4E-07	12731	1.8E-01
rs853974	6	127068983	t	0.28	0.06	0.01	1.0E-06	18881	6.6E-01
rs6905601	6	32330168	c	0.77	-0.06	0.01	1.1E-06	18881	9.6E-01
6:132796836	6	132796836	t	0.00	0.64	0.13	1.2E-06	12049	9.6E-02
rs2844475	6	31583155	a	0.38	-0.05	0.01	2.6E-06	17826	6.7E-01
rs154977	6	32900018	c	0.33	0.06	0.01	3.3E-06	18881	1.0E-01
rs9266538	6	31341918	t	0.22	0.10	0.02	3.7E-06	8285	8.3E-01
rs3130681	6	31880611	t	0.15	0.07	0.02	3.7E-06	18881	8.2E-01
rs116475394	6	32496276	a	0.67	-0.10	0.02	4.1E-06	8285	6.0E-01
rs182160085	6	57864780	t	0.01	0.35	0.08	4.3E-06	9444	7.3E-02
rs112355985	6	31231117	t	0.28	0.09	0.02	6.1E-06	8285	2.9E-01
rs2853968	6	31381351	a	0.56	0.05	0.01	9.8E-06	18881	8.4E-01
rs1063635	6	31379931	a	0.44	-0.05	0.01	9.8E-06	18881	8.3E-01
rs1055559	6	32832786	t	0.89	-0.08	0.02	1.2E-05	17826	3.5E-01
rs117844454	6	154517999	a	0.01	-0.29	0.07	1.2E-05	16386	8.5E-01
rs76907810	6	118008263	t	0.05	-0.10	0.02	1.5E-05	18881	8.4E-01
rs592229	6	31930441	t	0.55	-0.05	0.01	1.7E-05	18881	6.6E-01
rs1265048	6	31081409	t	0.65	0.05	0.01	1.7E-05	18881	8.6E-01
rs6459528	6	17193961	a	0.02	0.19	0.04	1.8E-05	16386	4.1E-01
rs9267806	6	32110886	a	0.29	-0.05	0.01	1.9E-05	18881	8.0E-01
rs9274241	6	32631265	t	0.29	-0.07	0.02	1.9E-05	12063	2.4E-01
6:121411223	6	121411223	t	0.00	0.60	0.14	2.5E-05	7453	8.8E-01
rs111467388	6	73636423	a	0.05	-0.11	0.03	3.3E-05	18881	7.7E-01
rs28362342	6	31165438	t	0.66	0.05	0.01	3.3E-05	18881	3.1E-01
rs58999888	6	135778399	t	0.02	-0.17	0.04	3.6E-05	17282	4.7E-01
rs190437164	6	64723684	a	0.01	-0.31	0.08	3.7E-05	11923	6.4E-01
rs75033303	6	141060407	a	0.05	0.11	0.03	3.8E-05	18881	5.4E-01
rs465782	6	111662367	a	0.27	-0.05	0.01	4.0E-05	18881	5.6E-01
rs3819290	6	31322662	a	0.21	-0.06	0.01	4.1E-05	18881	8.9E-01
rs10484759	6	127037042	t	0.24	-0.05	0.01	4.2E-05	18881	4.7E-01
rs7450527	6	142354491	a	0.78	0.05	0.01	4.4E-05	18881	5.9E-01
rs2353325	6	75507330	t	0.90	0.09	0.02	4.6E-05	12731	1.0E-02
rs17208902	6	32379547	t	0.19	-0.06	0.01	4.7E-05	18881	5.7E-01
rs12213816	6	132501393	a	0.32	0.05	0.01	5.0E-05	18881	3.7E-01
rs145550118	6	94242139	c	0.01	-0.26	0.06	5.2E-05	14510	4.9E-01
rs79412903	6	32589935	a	0.02	-0.26	0.06	5.3E-05	10829	3.9E-01
rs78038564	6	142504914	a	0.02	0.18	0.05	5.6E-05	18288	3.4E-02
rs9450260	6	86088947	t	0.12	0.07	0.02	6.1E-05	17119	8.8E-01
rs73015051	6	148849896	a	0.10	0.07	0.02	6.4E-05	18881	2.1E-01
rs146918117	6	120138740	t	0.98	0.28	0.07	6.6E-05	14138	2.8E-01
6:32668705	6	32668705	a	0.39	0.06	0.02	6.7E-05	10047	2.1E-02
rs146577493	6	162639214	t	0.98	0.33	0.08	6.9E-05	7691	3.4E-01
rs9388253	6	123856181	a	0.67	0.05	0.01	7.0E-05	18881	1.3E-01
6:23496150	6	23496150	c	0.99	-0.50	0.13	7.3E-05	8241	8.0E-01
6:39682593	6	39682593	t	1.00	-0.61	0.15	7.3E-05	8166	1.8E-01
rs141920269	6	47383856	a	0.02	-0.21	0.05	7.5E-05	13785	5.1E-01
6:163748123	6	163748123	t	0.02	0.22	0.06	7.5E-05	10047	5.8E-02
6:97030578	6	97030578	a	0.00	0.62	0.16	8.2E-05	8072	6.9E-01
6:31313724	6	31313724	t	0.84	-0.08	0.02	8.3E-05	10047	2.1E-01
rs116823011	6	32673726	a	0.78	0.07	0.02	8.9E-05	10047	7.6E-01
rs9266075	6	31319754	t	0.36	-0.04	0.01	9.5E-05	18881	7.1E-01
rs112925684	6	133474700	a	0.26	-0.05	0.01	9.5E-05	18881	9.2E-01
6:122890981	6	122890981	t	0.99	0.28	0.07	9.6E-05	11083	9.3E-01
rs2523486	6	31350943	t	0.17	0.06	0.01	1.0E-04	18881	7.2E-01
rs10241857	7	135318460	a	0.35	-0.06	0.01	6.0E-08	18881	2.8E-01
7:64165344	7	64165344	a	0.99	-0.58	0.12	1.5E-06	9928	1.0E-02
rs17170378	7	146955688	t	0.10	-0.09	0.02	1.7E-06	18881	6.5E-01
7:63921033	7	63921033	a	0.01	0.66	0.14	2.2E-06	5540	1.4E-02
rs142767594	7	74034281	a	0.04	-0.15	0.03	3.3E-06	17281	6.5E-01
rs3110803	7	135393766	t	0.44	0.06	0.01	4.1E-06	12731	6.8E-01
7:64196055	7	64196055	t	0.01	0.54	0.12	1.0E-05	9928	1.8E-02
rs12673689	7	45918943	a	0.13	0.07	0.02	1.8E-05	18881	2.0E-01
rs13240305	7	92576833	a	0.88	0.07	0.02	2.0E-05	18881	4.0E-01
rs148980792	7	55654084	t	0.96	0.15	0.04	2.3E-05	18584	6.5E-01
rs73267897	7	21335348	t	0.49	-0.06	0.01	2.6E-05	11676	7.9E-01
7:114433341	7	114433341	a	0.00	0.78	0.19	2.7E-05	6150	5.5E-01
rs117251113	7	158459828	t	0.01	0.25	0.06	3.8E-05	17729	6.6E-02
rs12701915	7	4787092	a	0.58	0.04	0.01	4.2E-05	18881	3.8E-01
rs11763211	7	38676809	t	0.40	0.04	0.01	4.2E-05	18881	4.6E-01
rs116943780	7	148775878	t	0.98	-0.19	0.05	4.4E-05	16682	2.1E-02
rs140537244	7	3044077	a	0.01	0.28	0.07	4.6E-05	16882	6.9E-01
rs117041914	7	49808472	a	0.02	0.20	0.05	5.0E-05	16386	2.0E-01
7:4256600	7	4256600	a	0.99	0.30	0.07	5.5E-05	17441	3.3E-01
rs12539569	7	38644914	t	0.03	0.13	0.03	6.1E-05	18881	3.4E-01
rs112595299	7	128017412	a	0.03	0.17	0.04	6.3E-05	17233	2.9E-01
rs62487180	7	153832238	c	0.96	-0.17	0.04	6.3E-05	8285	8.5E-01
rs146976766	7	32648902	a	0.01	-0.35	0.09	6.4E-05	14073	2.4E-01
7:53355294	7	53355294	a	0.00	0.55	0.14	6.7E-05	10161	3.3E-01
7:96653054	7	96653054	a	0.01	-0.25	0.06	6.7E-05	17729	9.7E-02
rs118136337	7	137852117	c	0.02	-0.19	0.05	7.0E-05	18288	2.8E-01
rs7787098	7	132911130	t	0.07	-0.12	0.03	7.1E-05	10047	9.7E-01
7:1817963	7	1817963	a	0.01	-0.61	0.16	7.9E-05	5235	3.9E-02
7:118492324	7	118492324	a	0.01	-0.48	0.12	7.9E-05	8374	5.6E-02
rs151188900	7	87362617	c	0.01	-0.32	0.08	8.2E-05	8360	2.3E-01
rs140190591	7	148530498	a	0.08	-0.12	0.03	9.4E-05	8285	6.4E-01
7:118614726	7	118614726	t	0.01	-0.48	0.12	1.0E-04	6285	3.8E-01
8:81870839	8	81870839	t	0.99	-0.33	0.08	1.7E-05	14281	2.7E-01
8:81870839	8	81870839	t	0.99	-0.33	0.08	1.7E-05	14281	2.7E-01
rs116900616	8	125770914	a	0.04	-0.12	0.03	1.7E-05	18881	6.4E-01
rs150667542	8	48621299	a	0.04	-0.12	0.03	1.9E-05	18881	7.8E-01
rs12547787	8	135735397	a	0.97	0.13	0.03	2.0E-05	18881	3.7E-01
rs17092176	8	20097325	t	0.64	-0.05	0.01	2.1E-05	18881	2.3E-01
rs141084380	8	107536798	a	0.01	-0.33	0.08	2.8E-05	14073	5.1E-02
rs10102650	8	10367049	t	0.32	0.05	0.01	2.9E-05	18881	1.8E-01
rs17055142	8	26201601	t	0.08	0.08	0.02	3.6E-05	18881	4.1E-01
rs2977151	8	12789182	t	0.13	-0.06	0.02	6.0E-05	18881	9.7E-01
rs1402651	8	20877223	a	0.40	-0.04	0.01	6.1E-05	18881	8.6E-02
rs117074385	8	43369269	t	0.03	-0.14	0.04	6.3E-05	18034	7.7E-01
rs193254696	8	120060298	a	0.00	-0.55	0.14	6.4E-05	9928	3.5E-01
rs143642085	8	107287216	t	0.01	-0.46	0.11	6.5E-05	8678	4.4E-01
rs34046390	8	42712654	c	0.97	0.13	0.03	7.0E-05	18034	7.1E-01
8:107533429	8	107533429	a	1.00	-0.66	0.17	7.3E-05	6721	5.1E-01
8:32036364	8	32036364	a	1.00	0.71	0.18	9.0E-05	6379	6.4E-01
rs17646897	8	8946376	a	0.35	0.04	0.01	9.0E-05	18881	6.6E-01
8:144194547	8	144194547	a	0.99	0.44	0.11	9.2E-05	6889	3.0E-01
rs118023716	8	3342790	t	0.96	0.11	0.03	1.0E-04	18034	4.4E-01
rs117063357	9	94079236	t	0.02	-0.21	0.05	8.8E-06	14281	9.8E-01
rs12553169	9	118082239	a	0.84	-0.06	0.01	1.4E-05	18881	1.8E-01
9:12255497	9	12255497	a	0.99	-0.41	0.10	1.7E-05	13825	5.5E-01
rs2627014	9	84327424	t	0.53	0.04	0.01	2.0E-05	18881	2.5E-02
9:37717167	9	37717167	c	0.99	-0.28	0.07	2.5E-05	17441	6.0E-02
9:104375385	9	104375385	t	0.00	-0.51	0.12	3.5E-05	8145	4.8E-01
rs79766510	9	21462526	t	0.02	0.17	0.04	4.0E-05	18288	5.3E-01
rs12347619	9	17910983	t	0.08	-0.15	0.04	4.5E-05	7531	3.0E-01
rs148759338	9	111313663	t	0.00	-0.69	0.17	5.1E-05	6150	7.9E-01
rs143881755	9	21620180	a	0.01	-0.25	0.06	5.6E-05	14632	7.7E-01
rs1571837	9	2329724	a	0.23	-0.05	0.01	5.9E-05	18881	1.3E-01
rs13285999	9	75225705	a	0.47	-0.04	0.01	6.8E-05	18881	6.0E-01
rs2277162	9	84305700	t	0.25	-0.05	0.01	7.6E-05	18881	4.1E-02
rs76574146	9	139135964	t	0.92	0.09	0.02	7.6E-05	18584	9.8E-01
rs138714042	9	73172605	t	0.98	-0.27	0.07	7.9E-05	10732	4.6E-01
rs1998973	9	113142196	a	0.91	-0.07	0.02	9.4E-05	18881	3.9E-01
rs62575263	9	118353966	a	0.12	0.06	0.02	1.0E-04	18881	2.4E-01
rs703066	10	16937562	a	0.60	-0.05	0.01	1.6E-06	18881	6.7E-01
rs9783189	10	8411320	a	0.62	-0.06	0.01	2.5E-06	12731	8.2E-01
rs58790726	10	70240379	c	0.42	0.05	0.01	3.5E-06	18881	5.0E-01
rs117452592	10	70172332	a	0.03	0.16	0.04	6.1E-06	18026	8.6E-01
rs10787469	10	114604007	c	0.54	0.05	0.01	1.4E-05	18881	3.4E-01
rs148974918	10	112033051	t	0.05	-0.11	0.03	1.6E-05	18881	6.2E-01
rs1986851	10	123897915	t	0.01	-0.66	0.15	1.6E-05	5154	6.3E-01
rs1649068	10	60304864	a	0.47	-0.05	0.01	1.9E-05	18881	7.9E-01
rs71477515	10	72554625	a	0.13	0.08	0.02	2.4E-05	11428	3.2E-01
10:86964503	10	86964503	t	0.01	0.30	0.07	3.4E-05	17233	7.3E-01
10:403587	10	403587	a	0.01	-0.49	0.12	3.6E-05	6379	8.9E-01
10:201776	10	201776	a	0.01	-0.49	0.12	3.8E-05	6379	9.6E-01
10:363602	10	363602	t	0.99	0.46	0.11	4.2E-05	6379	9.6E-01
10:373958	10	373958	a	0.01	-0.46	0.11	4.4E-05	6379	8.0E-01
rs147507776	10	17060488	t	0.01	-0.36	0.09	5.8E-05	9806	7.7E-01
rs2590376	10	60057136	c	0.90	-0.10	0.03	6.3E-05	8285	3.2E-01
10:109737675	10	109737675	t	1.00	0.43	0.11	7.1E-05	10681	8.2E-01
10:109732486	10	109732486	t	1.00	0.43	0.11	7.1E-05	10681	8.2E-01
rs76217774	10	135295214	a	0.01	-0.25	0.06	7.4E-05	13376	2.9E-01
10:68138070	10	68138070	t	0.00	0.50	0.13	7.5E-05	9200	8.2E-01
10:109738805	10	109738805	a	1.00	0.43	0.11	7.5E-05	10681	8.1E-01
10:129119094	10	129119094	t	0.01	0.31	0.08	8.0E-05	13226	7.1E-01
rs117808865	10	113227641	a	0.02	0.20	0.05	8.4E-05	16682	5.9E-01
rs111617423	10	108963340	a	0.03	0.20	0.05	8.8E-05	12731	2.2E-01
10:83158731	10	83158731	a	0.01	-0.39	0.10	1.0E-04	13151	4.2E-02
rs72850555	11	9348199	a	0.01	0.28	0.06	1.0E-06	16386	7.2E-01
rs7926190	11	68409963	a	0.27	-0.06	0.01	2.4E-06	18881	2.0E-01
rs7937148	11	134379060	a	0.03	-0.14	0.03	4.1E-06	18881	6.0E-01
11:63627827	11	63627827	t	0.01	0.52	0.12	8.3E-06	7076	4.3E-01
rs4930254	11	68733091	a	0.63	0.07	0.02	1.1E-05	8285	2.8E-01
rs80245812	11	95351117	a	0.03	0.15	0.03	1.6E-05	18881	4.3E-01
rs61901918	11	131367967	a	0.95	-0.11	0.03	3.5E-05	18881	1.6E-01
rs75603389	11	21655881	t	0.06	-0.10	0.02	4.0E-05	18881	5.3E-01
rs117842198	11	68709890	a	0.02	0.22	0.05	4.5E-05	17233	7.1E-01
11:5808186	11	5808186	c	0.00	-0.48	0.12	7.0E-05	9448	8.6E-01
rs3018165	11	77638744	t	0.38	0.06	0.02	7.3E-05	8285	3.7E-02
11:4640806	11	4640806	c	0.99	-0.40	0.10	8.1E-05	9448	6.9E-01
rs151064063	11	25830877	a	0.01	-0.21	0.05	8.4E-05	16386	6.3E-01
11:9147671	11	9147671	a	0.00	0.44	0.11	8.7E-05	12376	9.5E-01
rs7944938	11	29778264	a	0.14	-0.06	0.02	8.8E-05	18881	8.1E-01
rs4436549	11	63843197	t	0.02	-0.18	0.05	9.0E-05	17529	2.4E-01
rs552306	11	102676157	a	0.57	-0.04	0.01	9.3E-05	18881	9.1E-02
rs756152	11	15121130	t	0.60	0.04	0.01	1.0E-04	18881	7.6E-01
rs67624109	12	123824635	t	0.22	0.07	0.01	1.0E-08	18881	3.3E-01
rs3217859	12	4399036	a	0.17	0.08	0.01	1.5E-07	18881	8.9E-01
12:123786492	12	123786492	t	0.78	-0.09	0.02	2.4E-07	10047	5.1E-02
rs3217827	12	4392391	a	0.49	-0.05	0.01	7.3E-07	18881	6.2E-01
rs7306710	12	66376091	t	0.47	0.05	0.01	1.3E-06	18881	2.6E-01
12:83276248	12	83276248	t	0.01	-0.41	0.09	1.4E-05	11593	2.0E-01
rs3764010	12	27845924	t	0.69	-0.05	0.01	1.5E-05	18881	7.0E-01
rs117317686	12	65262952	c	0.97	0.16	0.04	2.1E-05	16682	8.4E-01
rs34230992	12	97703885	a	0.06	0.10	0.02	2.2E-05	18881	3.6E-01
12:87542616	12	87542616	t	0.98	0.46	0.11	2.2E-05	7438	8.4E-01
rs2350	12	55085208	a	0.88	-0.07	0.02	2.2E-05	18881	6.5E-01
rs7309494	12	53825993	a	0.81	-0.06	0.01	2.3E-05	18881	7.3E-01
rs1593852	12	20381100	c	0.45	0.05	0.01	2.4E-05	18881	6.3E-01
rs143916814	12	70397556	a	0.01	0.26	0.06	2.6E-05	16386	3.3E-01
rs73100117	12	32700788	t	0.14	0.06	0.02	2.7E-05	18881	5.8E-01
rs10783306	12	49516946	c	0.33	0.05	0.01	2.9E-05	18881	3.7E-01
rs1019315	12	97594620	t	0.68	-0.05	0.01	3.1E-05	18881	5.7E-01
rs10875941	12	49667921	t	0.75	-0.05	0.01	3.9E-05	18881	1.3E-01
rs10844083	12	32140903	a	0.80	-0.05	0.01	5.0E-05	18881	7.5E-02
rs2277325	12	58203377	a	0.02	-0.17	0.04	5.3E-05	17529	3.4E-01
rs61931710	12	124687345	t	0.96	-0.12	0.03	5.4E-05	18881	7.5E-01
rs17340879	12	14290517	t	0.97	0.15	0.04	5.6E-05	16683	5.7E-01
rs2683522	12	53783396	t	0.19	0.05	0.01	6.3E-05	18881	8.9E-01
12:3763001	12	3763001	t	0.00	0.63	0.16	6.3E-05	6358	4.6E-01
rs773114	12	56379060	a	0.60	-0.04	0.01	6.6E-05	18881	5.0E-01
12:133440830	12	133440830	t	0.01	-0.32	0.08	6.8E-05	16882	5.8E-01
rs187734227	12	64859107	a	0.01	0.25	0.06	6.8E-05	13523	9.9E-01
rs2555268	12	119604290	t	0.08	0.08	0.02	6.8E-05	18881	5.0E-01
rs60041429	12	129915307	a	0.01	0.26	0.07	7.1E-05	16882	3.7E-01
rs117815843	12	74464007	a	0.96	-0.12	0.03	7.5E-05	17529	1.7E-01
12:82749187	12	82749187	t	1.00	0.77	0.19	7.8E-05	5443	7.4E-01
rs139567758	12	112164268	a	0.98	0.19	0.05	8.2E-05	17529	3.8E-01
12:104445820	12	104445820	a	0.01	0.46	0.12	8.3E-05	7132	1.6E-01
12:63785094	12	63785094	t	0.00	0.41	0.10	8.4E-05	13832	6.9E-01
rs111873468	12	58929066	t	0.98	0.16	0.04	8.5E-05	18881	8.8E-01
rs2066827	12	12871099	t	0.76	0.05	0.01	9.3E-05	18881	3.6E-01
rs7957034	12	97754671	a	0.90	-0.08	0.02	9.8E-05	17826	2.8E-01
rs190434613	12	67728969	t	0.98	0.16	0.04	1.0E-04	18288	7.3E-01
rs3847883	12	97580029	t	0.33	0.04	0.01	1.0E-04	18881	4.7E-01
rs113501787	13	81476734	t	0.08	-0.10	0.02	2.7E-06	18881	5.3E-01
rs75710920	13	78633974	t	0.83	-0.06	0.01	6.3E-06	18881	7.1E-01
13:115092676	13	115092676	a	0.01	0.40	0.09	1.1E-05	11923	1.3E-01
13:115096095	13	115096095	a	0.01	0.40	0.09	1.4E-05	11923	1.4E-01
13:21060705	13	21060705	t	0.99	-0.34	0.08	1.9E-05	10983	7.7E-01
13:115075311	13	115075311	t	0.01	0.62	0.15	2.5E-05	6383	2.7E-01
rs9601627	13	82087510	a	0.88	0.07	0.02	2.7E-05	18881	5.3E-01
rs9593534	13	81661883	a	0.32	-0.05	0.01	2.9E-05	18881	8.4E-01
13:114524548	13	114524548	c	0.00	0.54	0.13	2.9E-05	9834	2.3E-02
rs140668091	13	40544710	t	0.01	0.25	0.06	3.3E-05	15827	8.6E-01
rs56147942	13	19257911	a	0.05	-0.15	0.04	5.0E-05	8141	7.9E-01
rs1980745	13	26525464	a	0.33	-0.05	0.01	5.2E-05	18881	4.5E-01
rs1744589	13	81281562	t	0.15	-0.08	0.02	5.5E-05	10047	8.5E-01
13:42277671	13	42277671	a	0.99	-0.23	0.06	5.9E-05	15752	8.8E-02
rs190416909	13	74218050	a	0.08	0.12	0.03	6.2E-05	8285	1.3E-01
rs148248620	13	67019736	a	0.90	0.12	0.03	6.2E-05	8285	1.6E-01
rs150434093	13	45664449	a	0.02	0.19	0.05	6.2E-05	16682	7.7E-01
rs117163311	13	109623686	t	0.11	0.07	0.02	9.8E-05	18881	1.9E-01
rs17071323	13	78556214	t	0.15	0.06	0.01	1.0E-04	18881	3.2E-01
rs10148050	14	71155984	a	0.81	0.06	0.01	9.1E-06	18881	3.8E-01
14:96226853	14	96226853	a	0.01	-0.47	0.11	1.1E-05	10597	5.0E-01
14:97208301	14	97208301	a	0.01	0.45	0.10	1.2E-05	5936	4.5E-01
rs58956968	14	35197903	c	0.76	0.07	0.02	2.3E-05	10047	1.8E-01
14:36003426	14	36003426	t	0.99	0.26	0.06	3.7E-05	13785	4.6E-01
14:51089823	14	51089823	a	1.00	-0.64	0.16	4.0E-05	6383	4.8E-01
14:58576373	14	58576373	a	1.00	0.51	0.13	5.2E-05	9200	2.4E-01
rs140917009	14	57375047	a	0.02	-0.15	0.04	5.5E-05	18881	2.4E-01
rs34670566	14	101286731	t	0.90	0.08	0.02	7.1E-05	18881	2.8E-01
14:79833389	14	79833389	t	0.01	0.21	0.05	8.4E-05	17729	8.0E-01
rs11160514	14	99812105	t	0.26	-0.05	0.01	8.4E-05	18881	8.7E-03
rs2890039	14	32503366	c	0.33	0.04	0.01	8.5E-05	18881	6.0E-01
rs76354420	14	85066093	a	0.07	-0.09	0.02	9.1E-05	18881	6.2E-01
rs73341526	14	95280004	t	0.01	-0.28	0.07	9.4E-05	16882	3.1E-01
rs12885263	14	91602719	c	0.38	-0.04	0.01	9.7E-05	18881	7.3E-01
rs142904994	14	86171242	t	0.98	-0.19	0.05	1.0E-04	16386	7.3E-01
rs4775307	15	61159196	t	0.01	-0.30	0.07	1.0E-05	14281	9.6E-01
rs4778708	15	79862903	t	0.26	-0.05	0.01	1.6E-05	18881	6.2E-02
rs8028391	15	69986486	a	0.98	0.21	0.05	2.0E-05	16227	8.4E-01
rs12898397	15	75130093	t	0.40	-0.04	0.01	3.2E-05	18881	4.8E-01
rs150302	15	89946789	c	0.51	-0.04	0.01	3.2E-05	18881	5.0E-01
15:97622893	15	97622893	a	0.01	-0.47	0.11	3.3E-05	10440	9.5E-01
rs148052648	15	73164580	c	0.01	0.23	0.06	4.5E-05	17233	1.2E-01
rs4932194	15	89245239	a	0.65	0.04	0.01	4.5E-05	18881	9.3E-04
rs143534520	15	82495385	t	0.02	0.17	0.04	5.1E-05	18585	4.5E-01
rs72740237	15	53013213	a	0.75	0.05	0.01	5.6E-05	18881	9.1E-01
15:80472845	15	80472845	a	1.00	-0.65	0.16	5.7E-05	6383	3.0E-01
rs12909047	15	74782356	a	0.49	0.04	0.01	5.7E-05	18881	1.3E-01
rs4924471	15	40744046	t	0.09	0.08	0.02	5.8E-05	18881	5.2E-01
15:80487873	15	80487873	a	1.00	-0.74	0.19	6.8E-05	6383	3.9E-01
rs1497809	15	36144105	t	0.31	0.05	0.01	7.6E-05	18881	9.4E-01
rs147216095	15	85246669	t	0.01	-0.25	0.06	8.0E-05	17233	3.0E-01
rs182754594	15	30233084	t	0.01	0.29	0.07	8.1E-05	14887	9.9E-01
rs7170697	15	96749826	a	0.80	-0.07	0.02	8.2E-05	10047	4.2E-01
rs77479802	15	93893098	t	0.07	0.09	0.02	8.4E-05	18881	1.6E-01
rs189104988	15	40970520	a	0.02	0.18	0.05	9.6E-05	18584	7.2E-01
15:80349406	15	80349406	t	0.00	0.58	0.15	9.7E-05	6383	2.7E-01
rs28422175	15	79837508	c	0.24	-0.05	0.01	1.0E-04	18881	2.5E-01
16:4034348	16	4034348	t	0.01	0.39	0.08	2.3E-06	14524	5.0E-02
rs71372800	16	89356701	c	0.22	0.08	0.02	4.9E-06	10047	4.9E-01
rs26852	16	2261657	a	0.47	-0.05	0.01	1.1E-05	18881	7.3E-01
rs142856662	16	10327985	a	0.01	0.34	0.08	1.3E-05	13832	3.2E-01
16:83448885	16	83448885	a	0.01	-0.33	0.08	1.7E-05	14073	8.4E-01
rs34033440	16	89539755	t	0.05	0.11	0.02	2.2E-05	18881	5.5E-01
rs7202426	16	55754793	a	0.02	0.15	0.04	4.0E-05	18881	1.5E-01
rs112077269	16	80431386	a	0.05	-0.16	0.04	4.3E-05	10047	8.0E-01
rs1990688	16	48878785	t	0.82	-0.06	0.01	5.1E-05	18881	3.5E-01
rs150699629	16	19703266	a	0.02	0.17	0.04	5.7E-05	18881	7.5E-01
rs166666	16	24910886	a	0.24	0.06	0.02	6.6E-05	12731	3.8E-01
16:86335180	16	86335180	a	0.98	0.36	0.09	7.0E-05	10047	9.4E-01
16:63570434	16	63570434	a	0.02	0.27	0.07	7.4E-05	16682	5.0E-02
16:73499427	16	73499427	t	0.01	0.40	0.10	8.8E-05	10746	8.5E-01
16:64091861	16	64091861	t	0.00	0.51	0.13	9.1E-05	9469	7.8E-01
16:12010960	16	12010960	t	1.00	0.48	0.12	9.2E-05	11923	5.4E-01
16:6501570	16	6501570	a	0.99	-0.44	0.11	9.7E-05	9834	9.9E-01
rs117863397	16	85548433	t	0.01	-0.41	0.11	9.7E-05	8447	9.4E-01
rs4467071	16	55755760	a	0.03	0.13	0.03	1.1E-04	18881	2.1E-01
rs35850753	17	7578671	t	0.02	0.22	0.04	2.0E-08	18584	2.1E-01
rs4989898	17	11991865	a	0.55	-0.07	0.02	1.1E-05	8285	4.9E-01
rs626657	17	37332963	a	0.13	-0.07	0.02	1.2E-05	18881	2.0E-01
17:9062098	17	9062098	a	0.01	-0.41	0.10	3.6E-05	12136	7.7E-01
rs78096421	17	47124760	t	0.96	0.11	0.03	3.8E-05	18881	8.0E-01
17:9056860	17	9056860	a	0.01	-0.40	0.10	3.9E-05	12136	7.5E-01
17:9174960	17	9174960	a	0.01	-0.26	0.06	4.2E-05	16882	8.5E-01
rs183628831	17	58045891	t	0.01	0.38	0.09	4.7E-05	8145	1.1E-01
rs8081274	17	79672355	a	0.84	-0.06	0.01	4.8E-05	18881	4.7E-01
rs189190107	17	76902450	a	0.98	-0.22	0.05	5.4E-05	17441	3.9E-01
rs116717883	17	65022655	a	0.92	0.11	0.03	6.9E-05	10047	4.7E-01
17:2900155	17	2900155	a	0.99	-0.59	0.15	7.5E-05	6477	6.2E-01
17:49312108	17	49312108	a	0.00	0.49	0.13	8.5E-05	10440	6.2E-01
rs112979959	17	38115873	t	0.89	-0.07	0.02	1.1E-04	18881	9.9E-01
rs138452387	1	69087229	a	0.00	0.52	0.10	3.6E-07	14138	6.2E-01
1:26479253	1	26479253	a	0.01	0.44	0.10	6.1E-06	11537	6.1E-01
1:18824654	1	18824654	a	0.99	0.38	0.08	6.1E-06	13226	6.6E-01
rs66615834	1	247846761	a	0.38	0.05	0.01	6.7E-06	18881	8.7E-01
rs77295005	1	80167991	t	0.99	0.23	0.05	6.7E-06	17179	1.7E-01
1:31543894	1	31543894	t	0.01	-0.32	0.07	8.8E-06	15827	3.3E-01
rs2345282	1	243739970	c	0.18	0.06	0.01	1.1E-05	18881	7.9E-01
rs9435811	1	229309538	c	0.47	0.05	0.01	1.6E-05	18881	7.9E-02
rs7526484	1	22451845	t	0.24	0.05	0.01	2.0E-05	18881	4.4E-01
rs1028665	1	232056301	a	0.83	0.06	0.01	2.1E-05	18881	4.7E-01
rs147591756	1	164991082	a	0.97	-0.15	0.04	2.2E-05	18881	2.5E-01
rs3116860	1	25203009	t	0.34	-0.05	0.01	2.4E-05	18881	3.2E-02
1:44750447	1	44750447	a	0.01	0.39	0.09	2.6E-05	9928	6.4E-01
rs834997	1	100111956	a	0.70	-0.05	0.01	2.6E-05	18881	4.1E-02
rs2935211	1	213110556	t	0.53	0.04	0.01	2.7E-05	18881	2.0E-01
1:86934014	1	86934014	a	0.00	0.51	0.12	2.8E-05	8145	7.3E-02
rs55720217	1	28277072	t	0.25	-0.05	0.01	3.3E-05	18881	4.2E-01
rs145837733	1	4334552	t	0.01	0.30	0.07	3.8E-05	13226	1.3E-01
rs147717560	1	223509452	t	0.02	-0.30	0.07	4.1E-05	10983	2.3E-01
rs4418594	1	111825261	a	0.40	-0.04	0.01	4.2E-05	18881	6.0E-01
rs148794102	1	235675584	a	0.04	0.13	0.03	5.1E-05	17529	5.7E-02
rs12128360	1	6986902	a	0.06	0.09	0.02	5.2E-05	18881	6.2E-01
1:182354890	1	182354890	t	0.01	0.37	0.09	5.3E-05	13104	3.9E-02
1:171690036	1	171690036	t	1.00	0.43	0.11	5.6E-05	10234	3.9E-01
rs1891062	1	214083466	t	0.35	0.05	0.01	5.8E-05	18881	6.6E-01
rs115163509	1	161253859	a	0.01	-0.32	0.08	6.0E-05	13226	8.9E-01
rs72741008	1	209846341	t	0.08	0.09	0.02	6.1E-05	17826	9.5E-01
1:171670579	1	171670579	a	0.99	0.42	0.10	6.1E-05	10234	1.4E-01
1:19127691	1	19127691	a	0.99	-0.59	0.15	6.4E-05	6077	2.0E-01
rs17140119	1	229238331	a	0.60	-0.04	0.01	6.5E-05	18881	2.4E-01
rs67347362	1	235259370	t	0.16	0.06	0.01	6.7E-05	18881	9.3E-01
1:171738961	1	171738961	a	1.00	0.43	0.11	7.4E-05	10234	3.6E-01
1:26508566	1	26508566	t	0.01	0.44	0.11	7.7E-05	10234	5.1E-01
1:36316881	1	36316881	c	1.00	0.56	0.14	7.8E-05	8145	1.0E+00
1:20139579	1	20139579	a	0.00	-0.54	0.14	8.0E-05	10161	2.7E-01
rs11577302	1	151141213	a	0.19	-0.05	0.01	8.5E-05	18881	4.9E-01
1:59971893	1	59971893	c	0.00	0.63	0.16	8.8E-05	6383	9.4E-01
rs72766196	1	229326054	a	0.95	-0.11	0.03	8.8E-05	17826	6.6E-01
rs1926867	1	183955742	t	0.17	0.05	0.01	8.9E-05	18881	3.4E-01
1:162298007	1	162298007	c	0.99	0.50	0.13	8.9E-05	5773	1.7E-01
rs4845812	1	5707816	t	0.32	-0.05	0.01	9.3E-05	18881	6.0E-01
1:237265932	1	237265932	a	0.02	-0.30	0.08	9.4E-05	10983	5.8E-01
rs76361015	1	48217341	a	0.04	-0.13	0.03	1.0E-04	18881	3.2E-01
rs79576701	2	183704659	t	0.91	-0.11	0.02	1.6E-08	18881	4.0E-01
rs41288837	2	85531116	t	0.03	-0.16	0.03	1.6E-06	17737	4.4E-02
rs61570189	2	207264555	c	0.28	0.06	0.01	2.1E-06	18881	6.2E-01
2:132657196	2	132657196	a	0.00	-0.77	0.17	4.0E-06	6358	4.8E-02
rs142061173	2	206884295	c	0.04	0.14	0.03	4.3E-06	17738	8.5E-01
2:85544631	2	85544631	t	0.02	-0.25	0.06	5.2E-06	13785	8.4E-01
2:175867638	2	175867638	a	0.01	-0.34	0.07	5.9E-06	15827	9.7E-01
rs116597003	2	125656363	a	0.98	-0.21	0.05	8.7E-06	17441	5.3E-01
rs138706496	2	230025041	a	0.02	-0.21	0.05	9.4E-06	18288	7.3E-01
2:199659842	2	199659842	c	1.00	-0.53	0.12	1.1E-05	11923	3.9E-03
rs78215374	2	33580769	t	0.02	-0.20	0.05	1.4E-05	17233	1.2E-02
rs7583237	2	66079084	a	0.90	-0.08	0.02	1.8E-05	18881	2.0E-01
2:109125446	2	109125446	a	1.00	0.59	0.14	1.9E-05	6997	7.9E-01
rs75905710	2	233734064	t	0.02	0.18	0.04	2.0E-05	17529	1.7E-01
2:209566150	2	209566150	a	0.01	-0.41	0.10	2.5E-05	10840	8.7E-01
rs6716080	2	42261813	t	0.65	-0.05	0.01	2.6E-05	18881	6.6E-01
rs75574593	2	33579554	a	0.98	0.27	0.06	2.6E-05	10003	8.0E-02
rs4444526	2	85552709	t	0.48	-0.04	0.01	2.6E-05	18881	3.1E-01
2:85555139	2	85555139	t	0.02	-0.24	0.06	3.0E-05	12096	8.7E-01
rs111684944	2	34506300	a	0.02	0.17	0.04	3.5E-05	18881	4.7E-01
2:69503310	2	69503310	t	0.01	0.33	0.08	3.6E-05	14281	9.6E-01
2:19959283	2	19959283	t	0.01	-0.27	0.07	3.6E-05	13226	5.4E-01
2:59913923	2	59913923	a	0.00	-0.59	0.14	3.7E-05	8166	5.8E-01
2:181137404	2	181137404	a	0.99	-0.38	0.09	3.7E-05	13226	8.3E-01
rs12986742	2	58975143	t	0.54	-0.04	0.01	3.7E-05	18881	5.2E-01
rs80151277	2	62115880	a	0.02	-0.22	0.05	4.3E-05	14632	8.9E-01
rs1159257	2	180133167	a	0.81	0.06	0.01	4.7E-05	18881	2.7E-01
2:69569087	2	69569087	c	0.99	-0.35	0.09	4.7E-05	12286	9.9E-01
2:156318791	2	156318791	t	0.99	0.51	0.13	4.8E-05	5540	1.0E-01
2:66413673	2	66413673	a	0.99	-0.42	0.10	4.9E-05	11305	2.7E-01
rs182548767	2	128047760	a	0.04	-0.24	0.06	5.5E-05	6383	5.9E-01
rs189368643	2	220594726	c	0.99	0.43	0.11	5.6E-05	9834	6.2E-01
2:238878704	2	238878704	a	0.98	0.26	0.06	5.6E-05	13951	7.0E-01
2:241309235	2	241309235	a	0.01	-0.56	0.14	5.7E-05	5418	5.7E-01
rs190798606	2	158256281	a	0.99	-0.30	0.07	6.0E-05	12935	2.3E-01
2:69619510	2	69619510	a	0.99	-0.35	0.09	6.1E-05	12286	9.7E-01
2:50782944	2	50782944	a	0.99	-0.53	0.13	6.3E-05	8239	8.6E-02
rs13002880	2	46708129	c	0.59	-0.04	0.01	6.5E-05	18881	5.5E-02
rs116200456	2	19949443	a	0.01	-0.26	0.06	6.7E-05	13226	7.0E-01
rs148404445	2	113995793	t	0.01	0.39	0.10	7.0E-05	8894	7.7E-01
rs114697149	2	57886839	a	0.02	-0.15	0.04	7.1E-05	18881	3.7E-01
rs66471729	2	236516472	t	0.24	-0.05	0.01	7.1E-05	18881	9.4E-01
rs13409184	2	208093232	t	0.05	-0.10	0.02	7.3E-05	18881	2.5E-01
rs186670214	2	46948766	c	0.01	-0.25	0.06	7.4E-05	14793	6.4E-01
2:108872183	2	108872183	c	0.99	0.36	0.09	7.5E-05	10295	1.3E-01
rs145247880	2	23091477	t	0.01	-0.31	0.08	7.6E-05	16882	2.9E-01
2:142009789	2	142009789	a	0.02	0.24	0.06	7.7E-05	8992	9.4E-01
rs41280583	2	99135812	c	0.99	0.29	0.07	8.0E-05	15193	8.8E-01
2:227344152	2	227344152	a	0.01	-0.39	0.10	8.0E-05	9448	8.7E-01
2:36048812	2	36048812	a	0.00	0.66	0.17	8.0E-05	5540	6.3E-01
2:161869638	2	161869638	a	0.98	0.32	0.08	8.2E-05	7230	6.6E-01
2:191033941	2	191033941	a	0.00	-0.64	0.16	8.3E-05	6150	1.7E-01
rs66894912	2	129048939	t	0.11	-0.07	0.02	8.3E-05	18881	8.4E-01
2:139411639	2	139411639	a	0.01	-0.47	0.12	8.5E-05	9078	8.8E-01
2:120343256	2	120343256	t	0.01	0.58	0.15	8.7E-05	7438	8.7E-01
2:19609717	2	19609717	a	0.01	0.42	0.11	9.6E-05	11984	7.2E-01
rs191591089	2	66864855	t	0.01	-0.27	0.07	9.7E-05	15827	2.7E-01
rs145959105	2	175089196	a	0.99	0.20	0.05	9.8E-05	17233	2.7E-01
rs77490311	2	41118737	t	0.95	-0.10	0.03	9.8E-05	18881	2.6E-01
2:85710031	2	85710031	t	0.02	-0.22	0.06	9.9E-05	13785	5.3E-01
rs4671260	2	56026374	t	0.64	0.04	0.01	9.9E-05	18881	5.4E-01
rs115067791	2	207033306	a	0.06	0.09	0.02	1.0E-04	18881	5.1E-01
3:147516620	3	147516620	a	0.99	-0.42	0.09	8.5E-06	12770	6.9E-01
3:147513385	3	147513385	a	0.99	-0.41	0.09	9.0E-06	12770	7.0E-01
rs35671868	3	25640522	t	0.96	-0.14	0.03	9.5E-06	17826	1.6E-02
rs6784404	3	141073675	a	0.40	0.05	0.01	1.9E-05	18881	6.2E-01
rs17036228	3	3784734	a	0.06	0.10	0.02	2.4E-05	18881	9.9E-02
rs7612364	3	126006518	a	0.47	-0.04	0.01	2.7E-05	18881	5.4E-01
3:171620657	3	171620657	c	0.00	0.63	0.15	2.8E-05	8992	5.0E-01
rs73857562	3	114451705	a	0.94	0.10	0.02	4.0E-05	18881	7.4E-01
rs6776884	3	34010566	a	0.05	-0.11	0.03	4.2E-05	18881	5.3E-01
3:93850612	3	93850612	t	1.00	-0.61	0.15	4.2E-05	5446	1.3E-01
rs9290484	3	173627617	t	0.78	0.05	0.01	4.3E-05	18881	5.3E-01
rs75234259	3	138343074	a	1.00	0.62	0.15	4.4E-05	8166	8.3E-01
rs353091	3	15194949	t	0.31	0.05	0.01	4.8E-05	18881	7.1E-01
rs112230831	3	84916603	a	0.86	0.08	0.02	4.9E-05	10047	3.0E-01
rs78304575	3	184069995	a	0.01	0.30	0.07	5.5E-05	14281	6.1E-01
3:102391066	3	102391066	a	0.01	0.32	0.08	5.6E-05	16386	9.6E-01
3:123369672	3	123369672	a	1.00	0.77	0.19	5.6E-05	6989	9.1E-02
rs12491472	3	68936483	a	0.15	-0.06	0.01	6.5E-05	18881	4.9E-02
rs1661521	3	3751794	a	0.24	0.05	0.01	6.6E-05	18881	6.3E-01
3:61006981	3	61006981	a	0.01	-0.54	0.14	8.3E-05	7205	7.9E-01
3:44789080	3	44789080	c	1.00	-0.59	0.15	8.8E-05	8145	9.2E-01
rs73148972	3	145846073	t	0.06	0.09	0.02	9.1E-05	18881	9.1E-01
rs9864495	3	9305364	t	0.99	-0.32	0.08	9.8E-05	12489	2.0E-01
rs148541282	3	167123547	t	0.99	0.22	0.06	9.9E-05	17441	8.0E-01
rs16859916	3	112372256	t	0.01	-0.38	0.10	1.0E-04	7588	6.4E-01
rs151039121	4	128608983	c	0.98	-0.25	0.05	1.2E-07	18881	7.3E-02
rs7674220	4	106148758	c	0.62	-0.05	0.01	3.4E-06	18881	2.2E-01
rs67465980	4	127948626	a	0.21	0.06	0.01	7.5E-06	18881	7.7E-01
4:172086259	4	172086259	a	0.00	-0.58	0.13	8.7E-06	8145	5.1E-01
4:57886159	4	57886159	a	0.99	0.38	0.09	9.4E-06	13682	4.8E-01
rs75129112	4	180037243	a	0.97	-0.28	0.06	9.5E-06	5540	2.1E-01
rs116036335	4	101073327	t	0.01	-0.32	0.07	1.2E-05	15827	6.3E-01
rs143529501	4	8618407	a	0.01	-0.30	0.07	1.7E-05	16138	1.1E-01
rs142621055	4	127952224	a	0.02	0.19	0.04	1.8E-05	18584	6.2E-02
rs2970848	4	23817027	a	0.68	0.05	0.01	1.8E-05	18881	7.9E-01
rs17501494	4	105997534	t	0.04	0.12	0.03	1.9E-05	18881	6.1E-01
4:143369026	4	143369026	t	1.00	0.52	0.12	2.0E-05	10440	5.5E-01
4:57789701	4	57789701	t	0.01	-0.35	0.08	2.6E-05	13682	2.6E-01
rs13121093	4	53395308	a	0.91	-0.08	0.02	3.7E-05	18881	9.2E-01
4:57923441	4	57923441	a	0.01	-0.35	0.09	4.0E-05	13682	6.5E-01
4:37068100	4	37068100	a	0.01	-0.47	0.12	4.9E-05	8751	1.8E-01
rs35419108	4	112111750	t	0.97	0.16	0.04	5.2E-05	17826	2.3E-01
4:174530062	4	174530062	a	0.00	-0.68	0.17	5.3E-05	6383	8.1E-01
4:128608184	4	128608184	t	0.01	0.60	0.15	6.3E-05	6383	1.4E-01
rs78688570	4	28079041	t	0.13	0.07	0.02	6.8E-05	18881	7.3E-01
rs117087123	4	58587232	a	0.00	0.50	0.13	7.1E-05	10234	6.6E-01
rs115634775	4	26702526	t	0.06	0.12	0.03	7.2E-05	12731	1.1E-01
4:106145142	4	106145142	a	0.01	-0.64	0.16	7.4E-05	5235	8.9E-01
rs4349616	4	126310531	a	0.42	0.05	0.01	7.5E-05	12731	7.3E-01
4:79972766	4	79972766	t	0.00	-0.50	0.13	7.7E-05	10234	7.8E-01
rs77061989	4	183454	a	0.96	0.12	0.03	8.4E-05	18026	7.2E-01
rs297270	4	27729448	t	0.54	0.04	0.01	8.8E-05	18881	9.6E-01
4:67995075	4	67995075	a	0.99	0.57	0.14	9.5E-05	5235	6.6E-01
rs34004000	4	57126068	t	0.54	0.04	0.01	1.0E-04	18881	3.4E-01
rs59824589	4	57125928	a	0.54	0.04	0.01	1.0E-04	18881	3.3E-01
rs13170536	5	39090374	t	0.23	0.06	0.01	6.6E-07	18881	4.1E-01
rs2237076	5	139720831	t	0.27	-0.06	0.01	2.7E-06	18881	9.7E-01
rs2563331	5	140025752	t	0.20	-0.06	0.01	2.8E-06	18881	5.9E-01
rs75438586	5	83204134	t	0.01	0.32	0.07	4.0E-06	15579	7.2E-01
5:75232708	5	75232708	a	0.99	0.62	0.14	6.8E-06	6721	2.3E-02
rs72810783	5	115772168	a	0.03	0.14	0.03	7.6E-06	18881	4.2E-01
rs6879356	5	178513411	a	0.32	0.06	0.01	1.3E-05	12731	7.5E-01
5:75232629	5	75232629	a	0.01	-0.56	0.13	1.9E-05	6721	9.5E-03
5:132122649	5	132122649	c	1.00	-0.81	0.19	2.0E-05	6477	2.1E-01
rs151244051	5	39334398	c	0.76	-0.07	0.02	2.2E-05	10047	6.0E-01
rs10471639	5	64048451	t	0.71	-0.07	0.02	2.2E-05	10130	1.1E-01
rs4976339	5	136440530	a	0.32	0.05	0.01	2.5E-05	18881	7.6E-01
5:62591973	5	62591973	t	0.01	0.28	0.07	3.2E-05	13226	5.8E-01
rs2059776	5	178539400	t	0.31	0.07	0.02	3.6E-05	8834	6.4E-01
rs76946570	5	126703618	t	0.96	0.12	0.03	4.0E-05	18881	8.1E-01
rs191009295	5	123215814	a	0.99	0.30	0.07	4.2E-05	16040	7.9E-01
rs141367846	5	1763590	a	0.98	-0.20	0.05	5.2E-05	15687	7.3E-01
rs115406185	5	123869863	a	0.06	-0.10	0.02	5.7E-05	18881	6.7E-01
5:142626622	5	142626622	a	0.01	-0.51	0.13	6.0E-05	5745	3.4E-01
rs62353935	5	29025746	a	0.89	-0.07	0.02	6.1E-05	18881	1.8E-01
rs62369779	5	32984219	t	0.96	-0.12	0.03	6.2E-05	16979	2.5E-01
rs144350462	5	24331604	a	0.99	-0.22	0.05	6.5E-05	18288	1.5E-01
rs116000354	5	95170623	c	0.90	-0.07	0.02	6.6E-05	18881	7.2E-01
5:56953421	5	56953421	a	0.01	-0.40	0.10	6.6E-05	10047	5.2E-02
rs6861437	5	115604241	a	0.66	0.07	0.02	7.0E-05	8285	4.3E-01
5:52063220	5	52063220	a	0.99	-0.38	0.10	7.0E-05	11537	2.2E-01
5:105562614	5	105562614	t	0.00	-0.48	0.12	7.5E-05	10767	4.9E-01
rs3822730	5	171174254	c	0.53	-0.04	0.01	7.8E-05	18881	1.0E-01
rs175086	5	139543091	a	0.54	0.04	0.01	7.9E-05	18881	4.4E-01
5:164501026	5	164501026	a	0.22	-0.07	0.02	8.0E-05	10047	5.7E-01
rs145385536	5	43241724	a	0.02	-0.16	0.04	8.1E-05	17529	3.5E-01
rs191480620	5	62592769	a	0.01	0.26	0.07	8.2E-05	13226	5.5E-01
rs113383618	5	135023723	c	0.99	-0.41	0.10	8.2E-05	5443	4.6E-01
rs11748486	5	178278709	a	0.32	-0.05	0.01	8.4E-05	18881	3.9E-01
rs12109893	5	34862348	t	0.84	0.06	0.02	8.7E-05	18881	2.2E-01
rs62376881	5	168578158	a	0.02	0.15	0.04	9.4E-05	18881	5.1E-01
rs251376	5	140253689	a	0.50	0.04	0.01	9.4E-05	18881	4.5E-01
rs10074160	5	164509574	a	0.21	-0.08	0.02	9.6E-05	8285	2.6E-01
rs12520550	5	28163673	a	0.81	-0.05	0.01	9.7E-05	18881	9.6E-01
rs4422515	5	72587455	t	0.59	-0.04	0.01	9.9E-05	18881	2.4E-01
5:63950547	5	63950547	a	0.98	-0.26	0.07	1.0E-04	11923	3.5E-01
rs1862176	5	139730444	a	0.69	0.04	0.01	1.0E-04	18881	6.1E-01
rs9268812	6	32424568	a	0.35	0.07	0.01	1.3E-09	18881	8.5E-01
rs11757660	6	31364035	t	0.70	0.06	0.01	2.9E-08	18881	1.7E-01
rs9265961	6	31315501	a	0.31	0.06	0.01	3.4E-08	18881	3.4E-01
rs73763159	6	108991686	t	0.10	-0.10	0.02	5.6E-08	18881	9.2E-01
rs2802295	6	108926496	a	0.39	-0.06	0.01	7.9E-08	18881	1.9E-01
rs3135377	6	32385399	a	0.23	0.07	0.01	1.0E-07	18881	5.6E-01
rs2095242	6	127217492	t	0.88	-0.09	0.02	1.0E-07	18881	7.9E-01
rs2857212	6	32740411	a	0.65	0.07	0.01	3.4E-07	12731	1.8E-01
rs853974	6	127068983	t	0.28	0.06	0.01	1.0E-06	18881	6.6E-01
rs6905601	6	32330168	c	0.77	-0.06	0.01	1.1E-06	18881	9.6E-01
6:132796836	6	132796836	t	0.00	0.64	0.13	1.2E-06	12049	9.6E-02
rs2844475	6	31583155	a	0.38	-0.05	0.01	2.6E-06	17826	6.7E-01
rs154977	6	32900018	c	0.33	0.06	0.01	3.3E-06	18881	1.0E-01
rs9266538	6	31341918	t	0.22	0.10	0.02	3.7E-06	8285	8.3E-01
rs3130681	6	31880611	t	0.15	0.07	0.02	3.7E-06	18881	8.2E-01
rs116475394	6	32496276	a	0.67	-0.10	0.02	4.1E-06	8285	6.0E-01
rs182160085	6	57864780	t	0.01	0.35	0.08	4.3E-06	9444	7.3E-02
rs112355985	6	31231117	t	0.28	0.09	0.02	6.1E-06	8285	2.9E-01
rs2853968	6	31381351	a	0.56	0.05	0.01	9.8E-06	18881	8.4E-01
rs1063635	6	31379931	a	0.44	-0.05	0.01	9.8E-06	18881	8.3E-01
rs1055559	6	32832786	t	0.89	-0.08	0.02	1.2E-05	17826	3.5E-01
rs117844454	6	154517999	a	0.01	-0.29	0.07	1.2E-05	16386	8.5E-01
rs76907810	6	118008263	t	0.05	-0.10	0.02	1.5E-05	18881	8.4E-01
rs592229	6	31930441	t	0.55	-0.05	0.01	1.7E-05	18881	6.6E-01
rs1265048	6	31081409	t	0.65	0.05	0.01	1.7E-05	18881	8.6E-01
rs6459528	6	17193961	a	0.02	0.19	0.04	1.8E-05	16386	4.1E-01
rs9267806	6	32110886	a	0.29	-0.05	0.01	1.9E-05	18881	8.0E-01
rs9274241	6	32631265	t	0.29	-0.07	0.02	1.9E-05	12063	2.4E-01
6:121411223	6	121411223	t	0.00	0.60	0.14	2.5E-05	7453	8.8E-01
rs111467388	6	73636423	a	0.05	-0.11	0.03	3.3E-05	18881	7.7E-01
rs28362342	6	31165438	t	0.66	0.05	0.01	3.3E-05	18881	3.1E-01
rs58999888	6	135778399	t	0.02	-0.17	0.04	3.6E-05	17282	4.7E-01
rs190437164	6	64723684	a	0.01	-0.31	0.08	3.7E-05	11923	6.4E-01
rs75033303	6	141060407	a	0.05	0.11	0.03	3.8E-05	18881	5.4E-01
rs465782	6	111662367	a	0.27	-0.05	0.01	4.0E-05	18881	5.6E-01
rs3819290	6	31322662	a	0.21	-0.06	0.01	4.1E-05	18881	8.9E-01
rs10484759	6	127037042	t	0.24	-0.05	0.01	4.2E-05	18881	4.7E-01
rs7450527	6	142354491	a	0.78	0.05	0.01	4.4E-05	18881	5.9E-01
rs2353325	6	75507330	t	0.90	0.09	0.02	4.6E-05	12731	1.0E-02
rs17208902	6	32379547	t	0.19	-0.06	0.01	4.7E-05	18881	5.7E-01
rs12213816	6	132501393	a	0.32	0.05	0.01	5.0E-05	18881	3.7E-01
rs145550118	6	94242139	c	0.01	-0.26	0.06	5.2E-05	14510	4.9E-01
rs79412903	6	32589935	a	0.02	-0.26	0.06	5.3E-05	10829	3.9E-01
rs78038564	6	142504914	a	0.02	0.18	0.05	5.6E-05	18288	3.4E-02
rs9450260	6	86088947	t	0.12	0.07	0.02	6.1E-05	17119	8.8E-01
rs73015051	6	148849896	a	0.10	0.07	0.02	6.4E-05	18881	2.1E-01
rs146918117	6	120138740	t	0.98	0.28	0.07	6.6E-05	14138	2.8E-01
6:32668705	6	32668705	a	0.39	0.06	0.02	6.7E-05	10047	2.1E-02
rs146577493	6	162639214	t	0.98	0.33	0.08	6.9E-05	7691	3.4E-01
rs9388253	6	123856181	a	0.67	0.05	0.01	7.0E-05	18881	1.3E-01
6:23496150	6	23496150	c	0.99	-0.50	0.13	7.3E-05	8241	8.0E-01
6:39682593	6	39682593	t	1.00	-0.61	0.15	7.3E-05	8166	1.8E-01
rs141920269	6	47383856	a	0.02	-0.21	0.05	7.5E-05	13785	5.1E-01
6:163748123	6	163748123	t	0.02	0.22	0.06	7.5E-05	10047	5.8E-02
6:97030578	6	97030578	a	0.00	0.62	0.16	8.2E-05	8072	6.9E-01
6:31313724	6	31313724	t	0.84	-0.08	0.02	8.3E-05	10047	2.1E-01
rs116823011	6	32673726	a	0.78	0.07	0.02	8.9E-05	10047	7.6E-01
rs9266075	6	31319754	t	0.36	-0.04	0.01	9.5E-05	18881	7.1E-01
rs112925684	6	133474700	a	0.26	-0.05	0.01	9.5E-05	18881	9.2E-01
6:122890981	6	122890981	t	0.99	0.28	0.07	9.6E-05	11083	9.3E-01
rs2523486	6	31350943	t	0.17	0.06	0.01	1.0E-04	18881	7.2E-01
rs10241857	7	135318460	a	0.35	-0.06	0.01	6.0E-08	18881	2.8E-01
7:64165344	7	64165344	a	0.99	-0.58	0.12	1.5E-06	9928	1.0E-02
rs17170378	7	146955688	t	0.10	-0.09	0.02	1.7E-06	18881	6.5E-01
7:63921033	7	63921033	a	0.01	0.66	0.14	2.2E-06	5540	1.4E-02
rs142767594	7	74034281	a	0.04	-0.15	0.03	3.3E-06	17281	6.5E-01
rs3110803	7	135393766	t	0.44	0.06	0.01	4.1E-06	12731	6.8E-01
7:64196055	7	64196055	t	0.01	0.54	0.12	1.0E-05	9928	1.8E-02
rs12673689	7	45918943	a	0.13	0.07	0.02	1.8E-05	18881	2.0E-01
rs13240305	7	92576833	a	0.88	0.07	0.02	2.0E-05	18881	4.0E-01
rs148980792	7	55654084	t	0.96	0.15	0.04	2.3E-05	18584	6.5E-01
rs73267897	7	21335348	t	0.49	-0.06	0.01	2.6E-05	11676	7.9E-01
7:114433341	7	114433341	a	0.00	0.78	0.19	2.7E-05	6150	5.5E-01
rs117251113	7	158459828	t	0.01	0.25	0.06	3.8E-05	17729	6.6E-02
rs12701915	7	4787092	a	0.58	0.04	0.01	4.2E-05	18881	3.8E-01
rs11763211	7	38676809	t	0.40	0.04	0.01	4.2E-05	18881	4.6E-01
rs116943780	7	148775878	t	0.98	-0.19	0.05	4.4E-05	16682	2.1E-02
rs140537244	7	3044077	a	0.01	0.28	0.07	4.6E-05	16882	6.9E-01
rs117041914	7	49808472	a	0.02	0.20	0.05	5.0E-05	16386	2.0E-01
7:4256600	7	4256600	a	0.99	0.30	0.07	5.5E-05	17441	3.3E-01
rs12539569	7	38644914	t	0.03	0.13	0.03	6.1E-05	18881	3.4E-01
rs112595299	7	128017412	a	0.03	0.17	0.04	6.3E-05	17233	2.9E-01
rs62487180	7	153832238	c	0.96	-0.17	0.04	6.3E-05	8285	8.5E-01
rs146976766	7	32648902	a	0.01	-0.35	0.09	6.4E-05	14073	2.4E-01
7:53355294	7	53355294	a	0.00	0.55	0.14	6.7E-05	10161	3.3E-01
7:96653054	7	96653054	a	0.01	-0.25	0.06	6.7E-05	17729	9.7E-02
rs118136337	7	137852117	c	0.02	-0.19	0.05	7.0E-05	18288	2.8E-01
rs7787098	7	132911130	t	0.07	-0.12	0.03	7.1E-05	10047	9.7E-01
7:1817963	7	1817963	a	0.01	-0.61	0.16	7.9E-05	5235	3.9E-02
7:118492324	7	118492324	a	0.01	-0.48	0.12	7.9E-05	8374	5.6E-02
rs151188900	7	87362617	c	0.01	-0.32	0.08	8.2E-05	8360	2.3E-01
rs140190591	7	148530498	a	0.08	-0.12	0.03	9.4E-05	8285	6.4E-01
7:118614726	7	118614726	t	0.01	-0.48	0.12	1.0E-04	6285	3.8E-01
8:81870839	8	81870839	t	0.99	-0.33	0.08	1.7E-05	14281	2.7E-01
8:81870839	8	81870839	t	0.99	-0.33	0.08	1.7E-05	14281	2.7E-01
rs116900616	8	125770914	a	0.04	-0.12	0.03	1.7E-05	18881	6.4E-01
rs150667542	8	48621299	a	0.04	-0.12	0.03	1.9E-05	18881	7.8E-01
rs12547787	8	135735397	a	0.97	0.13	0.03	2.0E-05	18881	3.7E-01
rs17092176	8	20097325	t	0.64	-0.05	0.01	2.1E-05	18881	2.3E-01
rs141084380	8	107536798	a	0.01	-0.33	0.08	2.8E-05	14073	5.1E-02
rs10102650	8	10367049	t	0.32	0.05	0.01	2.9E-05	18881	1.8E-01
rs17055142	8	26201601	t	0.08	0.08	0.02	3.6E-05	18881	4.1E-01
rs2977151	8	12789182	t	0.13	-0.06	0.02	6.0E-05	18881	9.7E-01
rs1402651	8	20877223	a	0.40	-0.04	0.01	6.1E-05	18881	8.6E-02
rs117074385	8	43369269	t	0.03	-0.14	0.04	6.3E-05	18034	7.7E-01
rs193254696	8	120060298	a	0.00	-0.55	0.14	6.4E-05	9928	3.5E-01
rs143642085	8	107287216	t	0.01	-0.46	0.11	6.5E-05	8678	4.4E-01
rs34046390	8	42712654	c	0.97	0.13	0.03	7.0E-05	18034	7.1E-01
8:107533429	8	107533429	a	1.00	-0.66	0.17	7.3E-05	6721	5.1E-01
8:32036364	8	32036364	a	1.00	0.71	0.18	9.0E-05	6379	6.4E-01
rs17646897	8	8946376	a	0.35	0.04	0.01	9.0E-05	18881	6.6E-01
8:144194547	8	144194547	a	0.99	0.44	0.11	9.2E-05	6889	3.0E-01
rs118023716	8	3342790	t	0.96	0.11	0.03	1.0E-04	18034	4.4E-01
rs117063357	9	94079236	t	0.02	-0.21	0.05	8.8E-06	14281	9.8E-01
rs12553169	9	118082239	a	0.84	-0.06	0.01	1.4E-05	18881	1.8E-01
9:12255497	9	12255497	a	0.99	-0.41	0.10	1.7E-05	13825	5.5E-01
rs2627014	9	84327424	t	0.53	0.04	0.01	2.0E-05	18881	2.5E-02
9:37717167	9	37717167	c	0.99	-0.28	0.07	2.5E-05	17441	6.0E-02
9:104375385	9	104375385	t	0.00	-0.51	0.12	3.5E-05	8145	4.8E-01
rs79766510	9	21462526	t	0.02	0.17	0.04	4.0E-05	18288	5.3E-01
rs12347619	9	17910983	t	0.08	-0.15	0.04	4.5E-05	7531	3.0E-01
rs148759338	9	111313663	t	0.00	-0.69	0.17	5.1E-05	6150	7.9E-01
rs143881755	9	21620180	a	0.01	-0.25	0.06	5.6E-05	14632	7.7E-01
rs1571837	9	2329724	a	0.23	-0.05	0.01	5.9E-05	18881	1.3E-01
rs13285999	9	75225705	a	0.47	-0.04	0.01	6.8E-05	18881	6.0E-01
rs2277162	9	84305700	t	0.25	-0.05	0.01	7.6E-05	18881	4.1E-02
rs76574146	9	139135964	t	0.92	0.09	0.02	7.6E-05	18584	9.8E-01
rs138714042	9	73172605	t	0.98	-0.27	0.07	7.9E-05	10732	4.6E-01
rs1998973	9	113142196	a	0.91	-0.07	0.02	9.4E-05	18881	3.9E-01
rs62575263	9	118353966	a	0.12	0.06	0.02	1.0E-04	18881	2.4E-01
rs703066	10	16937562	a	0.60	-0.05	0.01	1.6E-06	18881	6.7E-01
rs9783189	10	8411320	a	0.62	-0.06	0.01	2.5E-06	12731	8.2E-01
rs58790726	10	70240379	c	0.42	0.05	0.01	3.5E-06	18881	5.0E-01
rs117452592	10	70172332	a	0.03	0.16	0.04	6.1E-06	18026	8.6E-01
rs10787469	10	114604007	c	0.54	0.05	0.01	1.4E-05	18881	3.4E-01
rs148974918	10	112033051	t	0.05	-0.11	0.03	1.6E-05	18881	6.2E-01
rs1986851	10	123897915	t	0.01	-0.66	0.15	1.6E-05	5154	6.3E-01
rs1649068	10	60304864	a	0.47	-0.05	0.01	1.9E-05	18881	7.9E-01
rs71477515	10	72554625	a	0.13	0.08	0.02	2.4E-05	11428	3.2E-01
10:86964503	10	86964503	t	0.01	0.30	0.07	3.4E-05	17233	7.3E-01
10:403587	10	403587	a	0.01	-0.49	0.12	3.6E-05	6379	8.9E-01
10:201776	10	201776	a	0.01	-0.49	0.12	3.8E-05	6379	9.6E-01
10:363602	10	363602	t	0.99	0.46	0.11	4.2E-05	6379	9.6E-01
10:373958	10	373958	a	0.01	-0.46	0.11	4.4E-05	6379	8.0E-01
rs147507776	10	17060488	t	0.01	-0.36	0.09	5.8E-05	9806	7.7E-01
rs2590376	10	60057136	c	0.90	-0.10	0.03	6.3E-05	8285	3.2E-01
10:109737675	10	109737675	t	1.00	0.43	0.11	7.1E-05	10681	8.2E-01
10:109732486	10	109732486	t	1.00	0.43	0.11	7.1E-05	10681	8.2E-01
rs76217774	10	135295214	a	0.01	-0.25	0.06	7.4E-05	13376	2.9E-01
10:68138070	10	68138070	t	0.00	0.50	0.13	7.5E-05	9200	8.2E-01
10:109738805	10	109738805	a	1.00	0.43	0.11	7.5E-05	10681	8.1E-01
10:129119094	10	129119094	t	0.01	0.31	0.08	8.0E-05	13226	7.1E-01
rs117808865	10	113227641	a	0.02	0.20	0.05	8.4E-05	16682	5.9E-01
rs111617423	10	108963340	a	0.03	0.20	0.05	8.8E-05	12731	2.2E-01
10:83158731	10	83158731	a	0.01	-0.39	0.10	1.0E-04	13151	4.2E-02
rs72850555	11	9348199	a	0.01	0.28	0.06	1.0E-06	16386	7.2E-01
rs7926190	11	68409963	a	0.27	-0.06	0.01	2.4E-06	18881	2.0E-01
rs7937148	11	134379060	a	0.03	-0.14	0.03	4.1E-06	18881	6.0E-01
11:63627827	11	63627827	t	0.01	0.52	0.12	8.3E-06	7076	4.3E-01
rs4930254	11	68733091	a	0.63	0.07	0.02	1.1E-05	8285	2.8E-01
rs80245812	11	95351117	a	0.03	0.15	0.03	1.6E-05	18881	4.3E-01
rs61901918	11	131367967	a	0.95	-0.11	0.03	3.5E-05	18881	1.6E-01
rs75603389	11	21655881	t	0.06	-0.10	0.02	4.0E-05	18881	5.3E-01
rs117842198	11	68709890	a	0.02	0.22	0.05	4.5E-05	17233	7.1E-01
11:5808186	11	5808186	c	0.00	-0.48	0.12	7.0E-05	9448	8.6E-01
rs3018165	11	77638744	t	0.38	0.06	0.02	7.3E-05	8285	3.7E-02
11:4640806	11	4640806	c	0.99	-0.40	0.10	8.1E-05	9448	6.9E-01
rs151064063	11	25830877	a	0.01	-0.21	0.05	8.4E-05	16386	6.3E-01
11:9147671	11	9147671	a	0.00	0.44	0.11	8.7E-05	12376	9.5E-01
rs7944938	11	29778264	a	0.14	-0.06	0.02	8.8E-05	18881	8.1E-01
rs4436549	11	63843197	t	0.02	-0.18	0.05	9.0E-05	17529	2.4E-01
rs552306	11	102676157	a	0.57	-0.04	0.01	9.3E-05	18881	9.1E-02
rs756152	11	15121130	t	0.60	0.04	0.01	1.0E-04	18881	7.6E-01
rs67624109	12	123824635	t	0.22	0.07	0.01	1.0E-08	18881	3.3E-01
rs3217859	12	4399036	a	0.17	0.08	0.01	1.5E-07	18881	8.9E-01
12:123786492	12	123786492	t	0.78	-0.09	0.02	2.4E-07	10047	5.1E-02
rs3217827	12	4392391	a	0.49	-0.05	0.01	7.3E-07	18881	6.2E-01
rs7306710	12	66376091	t	0.47	0.05	0.01	1.3E-06	18881	2.6E-01
12:83276248	12	83276248	t	0.01	-0.41	0.09	1.4E-05	11593	2.0E-01
rs3764010	12	27845924	t	0.69	-0.05	0.01	1.5E-05	18881	7.0E-01
rs117317686	12	65262952	c	0.97	0.16	0.04	2.1E-05	16682	8.4E-01
rs34230992	12	97703885	a	0.06	0.10	0.02	2.2E-05	18881	3.6E-01
12:87542616	12	87542616	t	0.98	0.46	0.11	2.2E-05	7438	8.4E-01
rs2350	12	55085208	a	0.88	-0.07	0.02	2.2E-05	18881	6.5E-01
rs7309494	12	53825993	a	0.81	-0.06	0.01	2.3E-05	18881	7.3E-01
rs1593852	12	20381100	c	0.45	0.05	0.01	2.4E-05	18881	6.3E-01
rs143916814	12	70397556	a	0.01	0.26	0.06	2.6E-05	16386	3.3E-01
rs73100117	12	32700788	t	0.14	0.06	0.02	2.7E-05	18881	5.8E-01
rs10783306	12	49516946	c	0.33	0.05	0.01	2.9E-05	18881	3.7E-01
rs1019315	12	97594620	t	0.68	-0.05	0.01	3.1E-05	18881	5.7E-01
rs10875941	12	49667921	t	0.75	-0.05	0.01	3.9E-05	18881	1.3E-01
rs10844083	12	32140903	a	0.80	-0.05	0.01	5.0E-05	18881	7.5E-02
rs2277325	12	58203377	a	0.02	-0.17	0.04	5.3E-05	17529	3.4E-01
rs61931710	12	124687345	t	0.96	-0.12	0.03	5.4E-05	18881	7.5E-01
rs17340879	12	14290517	t	0.97	0.15	0.04	5.6E-05	16683	5.7E-01
rs2683522	12	53783396	t	0.19	0.05	0.01	6.3E-05	18881	8.9E-01
12:3763001	12	3763001	t	0.00	0.63	0.16	6.3E-05	6358	4.6E-01
rs773114	12	56379060	a	0.60	-0.04	0.01	6.6E-05	18881	5.0E-01
12:133440830	12	133440830	t	0.01	-0.32	0.08	6.8E-05	16882	5.8E-01
rs187734227	12	64859107	a	0.01	0.25	0.06	6.8E-05	13523	9.9E-01
rs2555268	12	119604290	t	0.08	0.08	0.02	6.8E-05	18881	5.0E-01
rs60041429	12	129915307	a	0.01	0.26	0.07	7.1E-05	16882	3.7E-01
rs117815843	12	74464007	a	0.96	-0.12	0.03	7.5E-05	17529	1.7E-01
12:82749187	12	82749187	t	1.00	0.77	0.19	7.8E-05	5443	7.4E-01
rs139567758	12	112164268	a	0.98	0.19	0.05	8.2E-05	17529	3.8E-01
12:104445820	12	104445820	a	0.01	0.46	0.12	8.3E-05	7132	1.6E-01
12:63785094	12	63785094	t	0.00	0.41	0.10	8.4E-05	13832	6.9E-01
rs111873468	12	58929066	t	0.98	0.16	0.04	8.5E-05	18881	8.8E-01
rs2066827	12	12871099	t	0.76	0.05	0.01	9.3E-05	18881	3.6E-01
rs7957034	12	97754671	a	0.90	-0.08	0.02	9.8E-05	17826	2.8E-01
rs190434613	12	67728969	t	0.98	0.16	0.04	1.0E-04	18288	7.3E-01
rs3847883	12	97580029	t	0.33	0.04	0.01	1.0E-04	18881	4.7E-01
rs113501787	13	81476734	t	0.08	-0.10	0.02	2.7E-06	18881	5.3E-01
rs75710920	13	78633974	t	0.83	-0.06	0.01	6.3E-06	18881	7.1E-01
13:115092676	13	115092676	a	0.01	0.40	0.09	1.1E-05	11923	1.3E-01
13:115096095	13	115096095	a	0.01	0.40	0.09	1.4E-05	11923	1.4E-01
13:21060705	13	21060705	t	0.99	-0.34	0.08	1.9E-05	10983	7.7E-01
13:115075311	13	115075311	t	0.01	0.62	0.15	2.5E-05	6383	2.7E-01
rs9601627	13	82087510	a	0.88	0.07	0.02	2.7E-05	18881	5.3E-01
rs9593534	13	81661883	a	0.32	-0.05	0.01	2.9E-05	18881	8.4E-01
13:114524548	13	114524548	c	0.00	0.54	0.13	2.9E-05	9834	2.3E-02
rs140668091	13	40544710	t	0.01	0.25	0.06	3.3E-05	15827	8.6E-01
rs56147942	13	19257911	a	0.05	-0.15	0.04	5.0E-05	8141	7.9E-01
rs1980745	13	26525464	a	0.33	-0.05	0.01	5.2E-05	18881	4.5E-01
rs1744589	13	81281562	t	0.15	-0.08	0.02	5.5E-05	10047	8.5E-01
13:42277671	13	42277671	a	0.99	-0.23	0.06	5.9E-05	15752	8.8E-02
rs190416909	13	74218050	a	0.08	0.12	0.03	6.2E-05	8285	1.3E-01
rs148248620	13	67019736	a	0.90	0.12	0.03	6.2E-05	8285	1.6E-01
rs150434093	13	45664449	a	0.02	0.19	0.05	6.2E-05	16682	7.7E-01
rs117163311	13	109623686	t	0.11	0.07	0.02	9.8E-05	18881	1.9E-01
rs17071323	13	78556214	t	0.15	0.06	0.01	1.0E-04	18881	3.2E-01
rs10148050	14	71155984	a	0.81	0.06	0.01	9.1E-06	18881	3.8E-01
14:96226853	14	96226853	a	0.01	-0.47	0.11	1.1E-05	10597	5.0E-01
14:97208301	14	97208301	a	0.01	0.45	0.10	1.2E-05	5936	4.5E-01
rs58956968	14	35197903	c	0.76	0.07	0.02	2.3E-05	10047	1.8E-01
14:36003426	14	36003426	t	0.99	0.26	0.06	3.7E-05	13785	4.6E-01
14:51089823	14	51089823	a	1.00	-0.64	0.16	4.0E-05	6383	4.8E-01
14:58576373	14	58576373	a	1.00	0.51	0.13	5.2E-05	9200	2.4E-01
rs140917009	14	57375047	a	0.02	-0.15	0.04	5.5E-05	18881	2.4E-01
rs34670566	14	101286731	t	0.90	0.08	0.02	7.1E-05	18881	2.8E-01
14:79833389	14	79833389	t	0.01	0.21	0.05	8.4E-05	17729	8.0E-01
rs11160514	14	99812105	t	0.26	-0.05	0.01	8.4E-05	18881	8.7E-03
rs2890039	14	32503366	c	0.33	0.04	0.01	8.5E-05	18881	6.0E-01
rs76354420	14	85066093	a	0.07	-0.09	0.02	9.1E-05	18881	6.2E-01
rs73341526	14	95280004	t	0.01	-0.28	0.07	9.4E-05	16882	3.1E-01
rs12885263	14	91602719	c	0.38	-0.04	0.01	9.7E-05	18881	7.3E-01
rs142904994	14	86171242	t	0.98	-0.19	0.05	1.0E-04	16386	7.3E-01
rs4775307	15	61159196	t	0.01	-0.30	0.07	1.0E-05	14281	9.6E-01
rs4778708	15	79862903	t	0.26	-0.05	0.01	1.6E-05	18881	6.2E-02
rs8028391	15	69986486	a	0.98	0.21	0.05	2.0E-05	16227	8.4E-01
rs12898397	15	75130093	t	0.40	-0.04	0.01	3.2E-05	18881	4.8E-01
rs150302	15	89946789	c	0.51	-0.04	0.01	3.2E-05	18881	5.0E-01
15:97622893	15	97622893	a	0.01	-0.47	0.11	3.3E-05	10440	9.5E-01
rs148052648	15	73164580	c	0.01	0.23	0.06	4.5E-05	17233	1.2E-01
rs4932194	15	89245239	a	0.65	0.04	0.01	4.5E-05	18881	9.3E-04
rs143534520	15	82495385	t	0.02	0.17	0.04	5.1E-05	18585	4.5E-01
rs72740237	15	53013213	a	0.75	0.05	0.01	5.6E-05	18881	9.1E-01
15:80472845	15	80472845	a	1.00	-0.65	0.16	5.7E-05	6383	3.0E-01
rs12909047	15	74782356	a	0.49	0.04	0.01	5.7E-05	18881	1.3E-01
rs4924471	15	40744046	t	0.09	0.08	0.02	5.8E-05	18881	5.2E-01
15:80487873	15	80487873	a	1.00	-0.74	0.19	6.8E-05	6383	3.9E-01
rs1497809	15	36144105	t	0.31	0.05	0.01	7.6E-05	18881	9.4E-01
rs147216095	15	85246669	t	0.01	-0.25	0.06	8.0E-05	17233	3.0E-01
rs182754594	15	30233084	t	0.01	0.29	0.07	8.1E-05	14887	9.9E-01
rs7170697	15	96749826	a	0.80	-0.07	0.02	8.2E-05	10047	4.2E-01
rs77479802	15	93893098	t	0.07	0.09	0.02	8.4E-05	18881	1.6E-01
rs189104988	15	40970520	a	0.02	0.18	0.05	9.6E-05	18584	7.2E-01
15:80349406	15	80349406	t	0.00	0.58	0.15	9.7E-05	6383	2.7E-01
rs28422175	15	79837508	c	0.24	-0.05	0.01	1.0E-04	18881	2.5E-01
16:4034348	16	4034348	t	0.01	0.39	0.08	2.3E-06	14524	5.0E-02
rs71372800	16	89356701	c	0.22	0.08	0.02	4.9E-06	10047	4.9E-01
rs26852	16	2261657	a	0.47	-0.05	0.01	1.1E-05	18881	7.3E-01
rs142856662	16	10327985	a	0.01	0.34	0.08	1.3E-05	13832	3.2E-01
16:83448885	16	83448885	a	0.01	-0.33	0.08	1.7E-05	14073	8.4E-01
rs34033440	16	89539755	t	0.05	0.11	0.02	2.2E-05	18881	5.5E-01
rs7202426	16	55754793	a	0.02	0.15	0.04	4.0E-05	18881	1.5E-01
rs112077269	16	80431386	a	0.05	-0.16	0.04	4.3E-05	10047	8.0E-01
rs1990688	16	48878785	t	0.82	-0.06	0.01	5.1E-05	18881	3.5E-01
rs150699629	16	19703266	a	0.02	0.17	0.04	5.7E-05	18881	7.5E-01
rs166666	16	24910886	a	0.24	0.06	0.02	6.6E-05	12731	3.8E-01
16:86335180	16	86335180	a	0.98	0.36	0.09	7.0E-05	10047	9.4E-01
16:63570434	16	63570434	a	0.02	0.27	0.07	7.4E-05	16682	5.0E-02
16:73499427	16	73499427	t	0.01	0.40	0.10	8.8E-05	10746	8.5E-01
16:64091861	16	64091861	t	0.00	0.51	0.13	9.1E-05	9469	7.8E-01
16:12010960	16	12010960	t	1.00	0.48	0.12	9.2E-05	11923	5.4E-01
16:6501570	16	6501570	a	0.99	-0.44	0.11	9.7E-05	9834	9.9E-01
rs117863397	16	85548433	t	0.01	-0.41	0.11	9.7E-05	8447	9.4E-01
rs4467071	16	55755760	a	0.03	0.13	0.03	1.1E-04	18881	2.1E-01
rs35850753	17	7578671	t	0.02	0.22	0.04	2.0E-08	18584	2.1E-01
rs4989898	17	11991865	a	0.55	-0.07	0.02	1.1E-05	8285	4.9E-01
rs626657	17	37332963	a	0.13	-0.07	0.02	1.2E-05	18881	2.0E-01
17:9062098	17	9062098	a	0.01	-0.41	0.10	3.6E-05	12136	7.7E-01
rs78096421	17	47124760	t	0.96	0.11	0.03	3.8E-05	18881	8.0E-01
17:9056860	17	9056860	a	0.01	-0.40	0.10	3.9E-05	12136	7.5E-01
17:9174960	17	9174960	a	0.01	-0.26	0.06	4.2E-05	16882	8.5E-01
rs183628831	17	58045891	t	0.01	0.38	0.09	4.7E-05	8145	1.1E-01
rs8081274	17	79672355	a	0.84	-0.06	0.01	4.8E-05	18881	4.7E-01
rs189190107	17	76902450	a	0.98	-0.22	0.05	5.4E-05	17441	3.9E-01
rs116717883	17	65022655	a	0.92	0.11	0.03	6.9E-05	10047	4.7E-01
17:2900155	17	2900155	a	0.99	-0.59	0.15	7.5E-05	6477	6.2E-01
17:49312108	17	49312108	a	0.00	0.49	0.13	8.5E-05	10440	6.2E-01
rs112979959	17	38115873	t	0.89	-0.07	0.02	1.1E-04	18881	9.9E-01
18:72772599	18	72772599	t	0.99	-0.34	0.07	3.6E-06	11542	5.7E-01
rs117088484	18	56367209	t	0.02	0.17	0.04	1.1E-05	18034	3.5E-01
rs78168368	18	63459183	c	0.98	0.22	0.05	2.6E-05	11892	5.5E-01
rs75547571	18	32772723	a	0.02	0.19	0.05	3.1E-05	17737	8.3E-01
18:20985964	18	20985964	t	0.01	0.30	0.07	3.3E-05	15827	4.1E-01
18:8292261	18	8292261	c	0.99	0.29	0.07	3.3E-05	16882	5.4E-04
18:20897405	18	20897405	t	0.01	0.30	0.07	5.0E-05	15827	8.7E-01
18:60235896	18	60235896	t	0.99	-0.44	0.11	5.1E-05	9444	9.2E-02
rs79177709	18	65376023	t	0.99	0.39	0.10	6.6E-05	6721	8.0E-01
rs117664641	18	56702076	t	0.06	0.12	0.03	7.9E-05	12731	9.5E-01
rs150104399	18	63371544	t	0.01	-0.33	0.09	1.0E-04	12494	6.5E-01
rs2571145	19	44903916	a	0.71	0.06	0.01	9.2E-06	17119	5.9E-01
rs17708332	19	15730101	t	0.81	0.06	0.01	3.4E-05	18881	4.3E-01
19:8613642	19	8613642	a	0.01	0.45	0.11	3.6E-05	10746	6.3E-01
19:8254543	19	8254543	c	1.00	-0.68	0.17	4.0E-05	5540	7.9E-01
19:1137743	19	1137743	t	0.04	-0.24	0.06	4.4E-05	6379	6.5E-01
rs12979350	19	556525	c	0.49	0.04	0.01	4.7E-05	18881	4.1E-01
rs6510760	19	3565253	a	0.06	0.10	0.03	4.8E-05	18881	5.2E-01
rs12709876	19	44895147	a	0.90	0.07	0.02	5.2E-05	18881	1.0E-01
rs73043217	19	41688444	t	0.16	0.06	0.02	5.2E-05	18881	9.0E-01
rs117038522	19	55629218	c	0.02	0.16	0.04	5.6E-05	18584	3.8E-01
rs2974249	19	48076721	a	0.06	-0.09	0.02	5.9E-05	18881	2.3E-01
19:58269156	19	58269156	t	0.00	0.44	0.11	5.9E-05	10234	5.6E-01
19:42703740	19	42703740	a	0.01	-0.50	0.12	6.2E-05	5651	1.6E-01
19:41321748	19	41321748	a	0.99	-0.27	0.07	6.5E-05	9200	3.0E-01
19:41321753	19	41321753	a	0.99	-0.27	0.07	6.5E-05	9200	3.0E-01
19:48605640	19	48605640	t	0.97	-0.21	0.05	6.7E-05	10047	6.4E-01
rs28371526	19	15774605	t	0.18	-0.05	0.01	1.0E-04	18881	3.5E-01
rs6061792	20	60322851	t	0.73	0.06	0.01	4.0E-06	18881	7.6E-01
rs73133684	20	50293039	t	0.02	0.16	0.04	1.4E-05	18881	7.4E-02
rs150180074	20	43224014	a	0.02	0.31	0.07	1.8E-05	9598	2.0E-01
20:22150956	20	22150956	t	0.00	-0.71	0.17	1.9E-05	8145	1.0E+00
rs4809531	20	61331678	a	0.62	0.05	0.01	2.2E-05	18881	4.9E-01
rs2424333	20	20278144	t	0.41	0.04	0.01	3.6E-05	18881	1.6E-01
rs2422858	20	3131488	t	0.34	-0.06	0.01	3.6E-05	12731	5.8E-01
rs742640	20	42554681	t	0.97	0.13	0.03	4.4E-05	18881	7.6E-01
20:60842038	20	60842038	t	0.01	0.59	0.14	4.6E-05	6358	5.5E-01
rs118095528	20	4920236	t	0.03	0.16	0.04	5.8E-05	18034	9.3E-01
rs117654023	20	55237432	t	0.01	0.32	0.08	6.6E-05	10440	3.9E-01
rs6029657	20	40026676	c	0.33	-0.04	0.01	7.9E-05	18881	5.1E-01
rs147959871	20	47061938	c	0.01	0.37	0.09	7.9E-05	8145	5.8E-01
rs142222872	20	44236390	t	0.99	0.36	0.09	7.9E-05	8700	3.7E-01
rs6121780	20	59979711	t	0.07	0.09	0.02	8.9E-05	18881	4.5E-01
20:18903947	20	18903947	a	1.00	0.62	0.16	9.1E-05	7839	4.7E-03
20:21906768	20	21906768	a	0.01	-0.38	0.10	9.4E-05	10440	2.3E-01
rs6129731	20	39660687	a	0.68	0.04	0.01	1.0E-04	18881	4.9E-01
rs6061350	20	60338026	a	0.28	-0.05	0.01	1.0E-04	18881	5.5E-01
rs189629782	21	27061330	t	0.98	-0.17	0.04	2.1E-05	18584	8.2E-01
rs139406961	21	35447840	c	0.03	-0.17	0.04	2.6E-05	17441	9.7E-01
21:41683045	21	41683045	c	0.00	-0.53	0.13	4.6E-05	8145	9.4E-01
rs2844303	21	23226656	a	0.08	-0.10	0.03	4.7E-05	12731	2.4E-01
21:42839661	21	42839661	t	0.01	-0.32	0.08	6.4E-05	11137	6.8E-01
rs59764913	21	46337127	a	0.02	0.16	0.04	7.9E-05	17738	2.7E-01
rs2026270	21	41342758	t	0.16	-0.06	0.02	8.4E-05	18881	2.6E-01
rs117724801	21	41345773	a	0.99	0.29	0.08	8.5E-05	9537	9.1E-01
rs142965874	21	18850134	a	0.01	0.18	0.05	1.1E-04	18584	5.2E-01
rs45532834	22	28157748	t	0.02	0.18	0.04	9.5E-06	16280	4.0E-01
22:19926530	22	19926530	t	1.00	-0.55	0.12	9.8E-06	11537	9.4E-01
rs79847867	22	16495833	a	0.09	-0.17	0.04	1.2E-05	6379	3.5E-01
22:36879126	22	36879126	a	0.00	-0.65	0.15	1.8E-05	6150	3.7E-01
rs8140034	22	33604383	a	0.80	-0.07	0.02	3.7E-05	12731	3.0E-01
rs16993225	22	23154058	t	0.16	0.10	0.02	3.7E-05	7839	7.2E-01
rs1029696	22	17703572	t	0.56	0.06	0.02	4.0E-05	8285	8.3E-01
22:40092487	22	40092487	t	0.00	0.58	0.14	4.4E-05	8145	3.0E-01
22:40318938	22	40318938	t	0.01	0.51	0.13	6.6E-05	8166	4.9E-01
rs66473469	22	36662654	a	0.94	0.11	0.03	7.4E-05	17826	7.3E-01
rs6007174	22	46267946	a	0.83	0.06	0.01	1.3E-04	18881	1.4E-01
rs138452387	1	69087229	a	0.00	0.52	0.10	3.6E-07	14138	6.2E-01
1:26479253	1	26479253	a	0.01	0.44	0.10	6.1E-06	11537	6.1E-01
1:18824654	1	18824654	a	0.99	0.38	0.08	6.1E-06	13226	6.6E-01
rs66615834	1	247846761	a	0.38	0.05	0.01	6.7E-06	18881	8.7E-01
rs77295005	1	80167991	t	0.99	0.23	0.05	6.7E-06	17179	1.7E-01
1:31543894	1	31543894	t	0.01	-0.32	0.07	8.8E-06	15827	3.3E-01
rs2345282	1	243739970	c	0.18	0.06	0.01	1.1E-05	18881	7.9E-01
rs9435811	1	229309538	c	0.47	0.05	0.01	1.6E-05	18881	7.9E-02
rs7526484	1	22451845	t	0.24	0.05	0.01	2.0E-05	18881	4.4E-01
rs1028665	1	232056301	a	0.83	0.06	0.01	2.1E-05	18881	4.7E-01
rs147591756	1	164991082	a	0.97	-0.15	0.04	2.2E-05	18881	2.5E-01
rs3116860	1	25203009	t	0.34	-0.05	0.01	2.4E-05	18881	3.2E-02
1:44750447	1	44750447	a	0.01	0.39	0.09	2.6E-05	9928	6.4E-01
rs834997	1	100111956	a	0.70	-0.05	0.01	2.6E-05	18881	4.1E-02
rs2935211	1	213110556	t	0.53	0.04	0.01	2.7E-05	18881	2.0E-01
1:86934014	1	86934014	a	0.00	0.51	0.12	2.8E-05	8145	7.3E-02
rs55720217	1	28277072	t	0.25	-0.05	0.01	3.3E-05	18881	4.2E-01
rs145837733	1	4334552	t	0.01	0.30	0.07	3.8E-05	13226	1.3E-01
rs147717560	1	223509452	t	0.02	-0.30	0.07	4.1E-05	10983	2.3E-01
rs4418594	1	111825261	a	0.40	-0.04	0.01	4.2E-05	18881	6.0E-01
rs148794102	1	235675584	a	0.04	0.13	0.03	5.1E-05	17529	5.7E-02
rs12128360	1	6986902	a	0.06	0.09	0.02	5.2E-05	18881	6.2E-01
1:182354890	1	182354890	t	0.01	0.37	0.09	5.3E-05	13104	3.9E-02
1:171690036	1	171690036	t	1.00	0.43	0.11	5.6E-05	10234	3.9E-01
rs1891062	1	214083466	t	0.35	0.05	0.01	5.8E-05	18881	6.6E-01
rs115163509	1	161253859	a	0.01	-0.32	0.08	6.0E-05	13226	8.9E-01
rs72741008	1	209846341	t	0.08	0.09	0.02	6.1E-05	17826	9.5E-01
1:171670579	1	171670579	a	0.99	0.42	0.10	6.1E-05	10234	1.4E-01
1:19127691	1	19127691	a	0.99	-0.59	0.15	6.4E-05	6077	2.0E-01
rs17140119	1	229238331	a	0.60	-0.04	0.01	6.5E-05	18881	2.4E-01
rs67347362	1	235259370	t	0.16	0.06	0.01	6.7E-05	18881	9.3E-01
1:171738961	1	171738961	a	1.00	0.43	0.11	7.4E-05	10234	3.6E-01
1:26508566	1	26508566	t	0.01	0.44	0.11	7.7E-05	10234	5.1E-01
1:36316881	1	36316881	c	1.00	0.56	0.14	7.8E-05	8145	1.0E+00
1:20139579	1	20139579	a	0.00	-0.54	0.14	8.0E-05	10161	2.7E-01
rs11577302	1	151141213	a	0.19	-0.05	0.01	8.5E-05	18881	4.9E-01
1:59971893	1	59971893	c	0.00	0.63	0.16	8.8E-05	6383	9.4E-01
rs72766196	1	229326054	a	0.95	-0.11	0.03	8.8E-05	17826	6.6E-01
rs1926867	1	183955742	t	0.17	0.05	0.01	8.9E-05	18881	3.4E-01
1:162298007	1	162298007	c	0.99	0.50	0.13	8.9E-05	5773	1.7E-01
rs4845812	1	5707816	t	0.32	-0.05	0.01	9.3E-05	18881	6.0E-01
1:237265932	1	237265932	a	0.02	-0.30	0.08	9.4E-05	10983	5.8E-01
rs76361015	1	48217341	a	0.04	-0.13	0.03	1.0E-04	18881	3.2E-01
rs79576701	2	183704659	t	0.91	-0.11	0.02	1.6E-08	18881	4.0E-01
rs41288837	2	85531116	t	0.03	-0.16	0.03	1.6E-06	17737	4.4E-02
rs61570189	2	207264555	c	0.28	0.06	0.01	2.1E-06	18881	6.2E-01
2:132657196	2	132657196	a	0.00	-0.77	0.17	4.0E-06	6358	4.8E-02
rs142061173	2	206884295	c	0.04	0.14	0.03	4.3E-06	17738	8.5E-01
2:85544631	2	85544631	t	0.02	-0.25	0.06	5.2E-06	13785	8.4E-01
2:175867638	2	175867638	a	0.01	-0.34	0.07	5.9E-06	15827	9.7E-01
rs116597003	2	125656363	a	0.98	-0.21	0.05	8.7E-06	17441	5.3E-01
rs138706496	2	230025041	a	0.02	-0.21	0.05	9.4E-06	18288	7.3E-01
2:199659842	2	199659842	c	1.00	-0.53	0.12	1.1E-05	11923	3.9E-03
rs78215374	2	33580769	t	0.02	-0.20	0.05	1.4E-05	17233	1.2E-02
rs7583237	2	66079084	a	0.90	-0.08	0.02	1.8E-05	18881	2.0E-01
2:109125446	2	109125446	a	1.00	0.59	0.14	1.9E-05	6997	7.9E-01
rs75905710	2	233734064	t	0.02	0.18	0.04	2.0E-05	17529	1.7E-01
2:209566150	2	209566150	a	0.01	-0.41	0.10	2.5E-05	10840	8.7E-01
rs6716080	2	42261813	t	0.65	-0.05	0.01	2.6E-05	18881	6.6E-01
rs75574593	2	33579554	a	0.98	0.27	0.06	2.6E-05	10003	8.0E-02
rs4444526	2	85552709	t	0.48	-0.04	0.01	2.6E-05	18881	3.1E-01
2:85555139	2	85555139	t	0.02	-0.24	0.06	3.0E-05	12096	8.7E-01
rs111684944	2	34506300	a	0.02	0.17	0.04	3.5E-05	18881	4.7E-01
2:69503310	2	69503310	t	0.01	0.33	0.08	3.6E-05	14281	9.6E-01
2:19959283	2	19959283	t	0.01	-0.27	0.07	3.6E-05	13226	5.4E-01
2:59913923	2	59913923	a	0.00	-0.59	0.14	3.7E-05	8166	5.8E-01
2:181137404	2	181137404	a	0.99	-0.38	0.09	3.7E-05	13226	8.3E-01
rs12986742	2	58975143	t	0.54	-0.04	0.01	3.7E-05	18881	5.2E-01
rs80151277	2	62115880	a	0.02	-0.22	0.05	4.3E-05	14632	8.9E-01
rs1159257	2	180133167	a	0.81	0.06	0.01	4.7E-05	18881	2.7E-01
2:69569087	2	69569087	c	0.99	-0.35	0.09	4.7E-05	12286	9.9E-01
2:156318791	2	156318791	t	0.99	0.51	0.13	4.8E-05	5540	1.0E-01
2:66413673	2	66413673	a	0.99	-0.42	0.10	4.9E-05	11305	2.7E-01
rs182548767	2	128047760	a	0.04	-0.24	0.06	5.5E-05	6383	5.9E-01
rs189368643	2	220594726	c	0.99	0.43	0.11	5.6E-05	9834	6.2E-01
2:238878704	2	238878704	a	0.98	0.26	0.06	5.6E-05	13951	7.0E-01
2:241309235	2	241309235	a	0.01	-0.56	0.14	5.7E-05	5418	5.7E-01
rs190798606	2	158256281	a	0.99	-0.30	0.07	6.0E-05	12935	2.3E-01
2:69619510	2	69619510	a	0.99	-0.35	0.09	6.1E-05	12286	9.7E-01
2:50782944	2	50782944	a	0.99	-0.53	0.13	6.3E-05	8239	8.6E-02
rs13002880	2	46708129	c	0.59	-0.04	0.01	6.5E-05	18881	5.5E-02
rs116200456	2	19949443	a	0.01	-0.26	0.06	6.7E-05	13226	7.0E-01
rs148404445	2	113995793	t	0.01	0.39	0.10	7.0E-05	8894	7.7E-01
rs114697149	2	57886839	a	0.02	-0.15	0.04	7.1E-05	18881	3.7E-01
rs66471729	2	236516472	t	0.24	-0.05	0.01	7.1E-05	18881	9.4E-01
rs13409184	2	208093232	t	0.05	-0.10	0.02	7.3E-05	18881	2.5E-01
rs186670214	2	46948766	c	0.01	-0.25	0.06	7.4E-05	14793	6.4E-01
2:108872183	2	108872183	c	0.99	0.36	0.09	7.5E-05	10295	1.3E-01
rs145247880	2	23091477	t	0.01	-0.31	0.08	7.6E-05	16882	2.9E-01
2:142009789	2	142009789	a	0.02	0.24	0.06	7.7E-05	8992	9.4E-01
rs41280583	2	99135812	c	0.99	0.29	0.07	8.0E-05	15193	8.8E-01
2:227344152	2	227344152	a	0.01	-0.39	0.10	8.0E-05	9448	8.7E-01
2:36048812	2	36048812	a	0.00	0.66	0.17	8.0E-05	5540	6.3E-01
2:161869638	2	161869638	a	0.98	0.32	0.08	8.2E-05	7230	6.6E-01
2:191033941	2	191033941	a	0.00	-0.64	0.16	8.3E-05	6150	1.7E-01
rs66894912	2	129048939	t	0.11	-0.07	0.02	8.3E-05	18881	8.4E-01
2:139411639	2	139411639	a	0.01	-0.47	0.12	8.5E-05	9078	8.8E-01
2:120343256	2	120343256	t	0.01	0.58	0.15	8.7E-05	7438	8.7E-01
2:19609717	2	19609717	a	0.01	0.42	0.11	9.6E-05	11984	7.2E-01
rs191591089	2	66864855	t	0.01	-0.27	0.07	9.7E-05	15827	2.7E-01
rs145959105	2	175089196	a	0.99	0.20	0.05	9.8E-05	17233	2.7E-01
rs77490311	2	41118737	t	0.95	-0.10	0.03	9.8E-05	18881	2.6E-01
2:85710031	2	85710031	t	0.02	-0.22	0.06	9.9E-05	13785	5.3E-01
rs4671260	2	56026374	t	0.64	0.04	0.01	9.9E-05	18881	5.4E-01
rs115067791	2	207033306	a	0.06	0.09	0.02	1.0E-04	18881	5.1E-01
3:147516620	3	147516620	a	0.99	-0.42	0.09	8.5E-06	12770	6.9E-01
3:147513385	3	147513385	a	0.99	-0.41	0.09	9.0E-06	12770	7.0E-01
rs35671868	3	25640522	t	0.96	-0.14	0.03	9.5E-06	17826	1.6E-02
rs6784404	3	141073675	a	0.40	0.05	0.01	1.9E-05	18881	6.2E-01
rs17036228	3	3784734	a	0.06	0.10	0.02	2.4E-05	18881	9.9E-02
rs7612364	3	126006518	a	0.47	-0.04	0.01	2.7E-05	18881	5.4E-01
3:171620657	3	171620657	c	0.00	0.63	0.15	2.8E-05	8992	5.0E-01
rs73857562	3	114451705	a	0.94	0.10	0.02	4.0E-05	18881	7.4E-01
rs6776884	3	34010566	a	0.05	-0.11	0.03	4.2E-05	18881	5.3E-01
3:93850612	3	93850612	t	1.00	-0.61	0.15	4.2E-05	5446	1.3E-01
rs9290484	3	173627617	t	0.78	0.05	0.01	4.3E-05	18881	5.3E-01
rs75234259	3	138343074	a	1.00	0.62	0.15	4.4E-05	8166	8.3E-01
rs353091	3	15194949	t	0.31	0.05	0.01	4.8E-05	18881	7.1E-01
rs112230831	3	84916603	a	0.86	0.08	0.02	4.9E-05	10047	3.0E-01
rs78304575	3	184069995	a	0.01	0.30	0.07	5.5E-05	14281	6.1E-01
3:102391066	3	102391066	a	0.01	0.32	0.08	5.6E-05	16386	9.6E-01
3:123369672	3	123369672	a	1.00	0.77	0.19	5.6E-05	6989	9.1E-02
rs12491472	3	68936483	a	0.15	-0.06	0.01	6.5E-05	18881	4.9E-02
rs1661521	3	3751794	a	0.24	0.05	0.01	6.6E-05	18881	6.3E-01
3:61006981	3	61006981	a	0.01	-0.54	0.14	8.3E-05	7205	7.9E-01
3:44789080	3	44789080	c	1.00	-0.59	0.15	8.8E-05	8145	9.2E-01
rs73148972	3	145846073	t	0.06	0.09	0.02	9.1E-05	18881	9.1E-01
rs9864495	3	9305364	t	0.99	-0.32	0.08	9.8E-05	12489	2.0E-01
rs148541282	3	167123547	t	0.99	0.22	0.06	9.9E-05	17441	8.0E-01
rs16859916	3	112372256	t	0.01	-0.38	0.10	1.0E-04	7588	6.4E-01
rs151039121	4	128608983	c	0.98	-0.25	0.05	1.2E-07	18881	7.3E-02
rs7674220	4	106148758	c	0.62	-0.05	0.01	3.4E-06	18881	2.2E-01
rs67465980	4	127948626	a	0.21	0.06	0.01	7.5E-06	18881	7.7E-01
4:172086259	4	172086259	a	0.00	-0.58	0.13	8.7E-06	8145	5.1E-01
4:57886159	4	57886159	a	0.99	0.38	0.09	9.4E-06	13682	4.8E-01
rs75129112	4	180037243	a	0.97	-0.28	0.06	9.5E-06	5540	2.1E-01
rs116036335	4	101073327	t	0.01	-0.32	0.07	1.2E-05	15827	6.3E-01
rs143529501	4	8618407	a	0.01	-0.30	0.07	1.7E-05	16138	1.1E-01
rs142621055	4	127952224	a	0.02	0.19	0.04	1.8E-05	18584	6.2E-02
rs2970848	4	23817027	a	0.68	0.05	0.01	1.8E-05	18881	7.9E-01
rs17501494	4	105997534	t	0.04	0.12	0.03	1.9E-05	18881	6.1E-01
4:143369026	4	143369026	t	1.00	0.52	0.12	2.0E-05	10440	5.5E-01
4:57789701	4	57789701	t	0.01	-0.35	0.08	2.6E-05	13682	2.6E-01
rs13121093	4	53395308	a	0.91	-0.08	0.02	3.7E-05	18881	9.2E-01
4:57923441	4	57923441	a	0.01	-0.35	0.09	4.0E-05	13682	6.5E-01
4:37068100	4	37068100	a	0.01	-0.47	0.12	4.9E-05	8751	1.8E-01
rs35419108	4	112111750	t	0.97	0.16	0.04	5.2E-05	17826	2.3E-01
4:174530062	4	174530062	a	0.00	-0.68	0.17	5.3E-05	6383	8.1E-01
4:128608184	4	128608184	t	0.01	0.60	0.15	6.3E-05	6383	1.4E-01
rs78688570	4	28079041	t	0.13	0.07	0.02	6.8E-05	18881	7.3E-01
rs117087123	4	58587232	a	0.00	0.50	0.13	7.1E-05	10234	6.6E-01
rs115634775	4	26702526	t	0.06	0.12	0.03	7.2E-05	12731	1.1E-01
4:106145142	4	106145142	a	0.01	-0.64	0.16	7.4E-05	5235	8.9E-01
rs4349616	4	126310531	a	0.42	0.05	0.01	7.5E-05	12731	7.3E-01
4:79972766	4	79972766	t	0.00	-0.50	0.13	7.7E-05	10234	7.8E-01
rs77061989	4	183454	a	0.96	0.12	0.03	8.4E-05	18026	7.2E-01
rs297270	4	27729448	t	0.54	0.04	0.01	8.8E-05	18881	9.6E-01
4:67995075	4	67995075	a	0.99	0.57	0.14	9.5E-05	5235	6.6E-01
rs34004000	4	57126068	t	0.54	0.04	0.01	1.0E-04	18881	3.4E-01
rs59824589	4	57125928	a	0.54	0.04	0.01	1.0E-04	18881	3.3E-01
rs13170536	5	39090374	t	0.23	0.06	0.01	6.6E-07	18881	4.1E-01
rs2237076	5	139720831	t	0.27	-0.06	0.01	2.7E-06	18881	9.7E-01
rs2563331	5	140025752	t	0.20	-0.06	0.01	2.8E-06	18881	5.9E-01
rs75438586	5	83204134	t	0.01	0.32	0.07	4.0E-06	15579	7.2E-01
5:75232708	5	75232708	a	0.99	0.62	0.14	6.8E-06	6721	2.3E-02
rs72810783	5	115772168	a	0.03	0.14	0.03	7.6E-06	18881	4.2E-01
rs6879356	5	178513411	a	0.32	0.06	0.01	1.3E-05	12731	7.5E-01
5:75232629	5	75232629	a	0.01	-0.56	0.13	1.9E-05	6721	9.5E-03
5:132122649	5	132122649	c	1.00	-0.81	0.19	2.0E-05	6477	2.1E-01
rs151244051	5	39334398	c	0.76	-0.07	0.02	2.2E-05	10047	6.0E-01
rs10471639	5	64048451	t	0.71	-0.07	0.02	2.2E-05	10130	1.1E-01
rs4976339	5	136440530	a	0.32	0.05	0.01	2.5E-05	18881	7.6E-01
5:62591973	5	62591973	t	0.01	0.28	0.07	3.2E-05	13226	5.8E-01
rs2059776	5	178539400	t	0.31	0.07	0.02	3.6E-05	8834	6.4E-01
rs76946570	5	126703618	t	0.96	0.12	0.03	4.0E-05	18881	8.1E-01
rs191009295	5	123215814	a	0.99	0.30	0.07	4.2E-05	16040	7.9E-01
rs141367846	5	1763590	a	0.98	-0.20	0.05	5.2E-05	15687	7.3E-01
rs115406185	5	123869863	a	0.06	-0.10	0.02	5.7E-05	18881	6.7E-01
5:142626622	5	142626622	a	0.01	-0.51	0.13	6.0E-05	5745	3.4E-01
rs62353935	5	29025746	a	0.89	-0.07	0.02	6.1E-05	18881	1.8E-01
rs62369779	5	32984219	t	0.96	-0.12	0.03	6.2E-05	16979	2.5E-01
rs144350462	5	24331604	a	0.99	-0.22	0.05	6.5E-05	18288	1.5E-01
rs116000354	5	95170623	c	0.90	-0.07	0.02	6.6E-05	18881	7.2E-01
5:56953421	5	56953421	a	0.01	-0.40	0.10	6.6E-05	10047	5.2E-02
rs6861437	5	115604241	a	0.66	0.07	0.02	7.0E-05	8285	4.3E-01
5:52063220	5	52063220	a	0.99	-0.38	0.10	7.0E-05	11537	2.2E-01
5:105562614	5	105562614	t	0.00	-0.48	0.12	7.5E-05	10767	4.9E-01
rs3822730	5	171174254	c	0.53	-0.04	0.01	7.8E-05	18881	1.0E-01
rs175086	5	139543091	a	0.54	0.04	0.01	7.9E-05	18881	4.4E-01
5:164501026	5	164501026	a	0.22	-0.07	0.02	8.0E-05	10047	5.7E-01
rs145385536	5	43241724	a	0.02	-0.16	0.04	8.1E-05	17529	3.5E-01
rs191480620	5	62592769	a	0.01	0.26	0.07	8.2E-05	13226	5.5E-01
rs113383618	5	135023723	c	0.99	-0.41	0.10	8.2E-05	5443	4.6E-01
rs11748486	5	178278709	a	0.32	-0.05	0.01	8.4E-05	18881	3.9E-01
rs12109893	5	34862348	t	0.84	0.06	0.02	8.7E-05	18881	2.2E-01
rs62376881	5	168578158	a	0.02	0.15	0.04	9.4E-05	18881	5.1E-01
rs251376	5	140253689	a	0.50	0.04	0.01	9.4E-05	18881	4.5E-01
rs10074160	5	164509574	a	0.21	-0.08	0.02	9.6E-05	8285	2.6E-01
rs12520550	5	28163673	a	0.81	-0.05	0.01	9.7E-05	18881	9.6E-01
rs4422515	5	72587455	t	0.59	-0.04	0.01	9.9E-05	18881	2.4E-01
5:63950547	5	63950547	a	0.98	-0.26	0.07	1.0E-04	11923	3.5E-01
rs1862176	5	139730444	a	0.69	0.04	0.01	1.0E-04	18881	6.1E-01
rs9268812	6	32424568	a	0.35	0.07	0.01	1.3E-09	18881	8.5E-01
rs11757660	6	31364035	t	0.70	0.06	0.01	2.9E-08	18881	1.7E-01
rs9265961	6	31315501	a	0.31	0.06	0.01	3.4E-08	18881	3.4E-01
rs73763159	6	108991686	t	0.10	-0.10	0.02	5.6E-08	18881	9.2E-01
rs2802295	6	108926496	a	0.39	-0.06	0.01	7.9E-08	18881	1.9E-01
rs3135377	6	32385399	a	0.23	0.07	0.01	1.0E-07	18881	5.6E-01
rs2095242	6	127217492	t	0.88	-0.09	0.02	1.0E-07	18881	7.9E-01
rs2857212	6	32740411	a	0.65	0.07	0.01	3.4E-07	12731	1.8E-01
rs853974	6	127068983	t	0.28	0.06	0.01	1.0E-06	18881	6.6E-01
rs6905601	6	32330168	c	0.77	-0.06	0.01	1.1E-06	18881	9.6E-01
6:132796836	6	132796836	t	0.00	0.64	0.13	1.2E-06	12049	9.6E-02
rs2844475	6	31583155	a	0.38	-0.05	0.01	2.6E-06	17826	6.7E-01
rs154977	6	32900018	c	0.33	0.06	0.01	3.3E-06	18881	1.0E-01
rs9266538	6	31341918	t	0.22	0.10	0.02	3.7E-06	8285	8.3E-01
rs3130681	6	31880611	t	0.15	0.07	0.02	3.7E-06	18881	8.2E-01
rs116475394	6	32496276	a	0.67	-0.10	0.02	4.1E-06	8285	6.0E-01
rs182160085	6	57864780	t	0.01	0.35	0.08	4.3E-06	9444	7.3E-02
rs112355985	6	31231117	t	0.28	0.09	0.02	6.1E-06	8285	2.9E-01
rs2853968	6	31381351	a	0.56	0.05	0.01	9.8E-06	18881	8.4E-01
rs1063635	6	31379931	a	0.44	-0.05	0.01	9.8E-06	18881	8.3E-01
rs1055559	6	32832786	t	0.89	-0.08	0.02	1.2E-05	17826	3.5E-01
rs117844454	6	154517999	a	0.01	-0.29	0.07	1.2E-05	16386	8.5E-01
rs76907810	6	118008263	t	0.05	-0.10	0.02	1.5E-05	18881	8.4E-01
rs592229	6	31930441	t	0.55	-0.05	0.01	1.7E-05	18881	6.6E-01
rs1265048	6	31081409	t	0.65	0.05	0.01	1.7E-05	18881	8.6E-01
rs6459528	6	17193961	a	0.02	0.19	0.04	1.8E-05	16386	4.1E-01
rs9267806	6	32110886	a	0.29	-0.05	0.01	1.9E-05	18881	8.0E-01
rs9274241	6	32631265	t	0.29	-0.07	0.02	1.9E-05	12063	2.4E-01
6:121411223	6	121411223	t	0.00	0.60	0.14	2.5E-05	7453	8.8E-01
rs111467388	6	73636423	a	0.05	-0.11	0.03	3.3E-05	18881	7.7E-01
rs28362342	6	31165438	t	0.66	0.05	0.01	3.3E-05	18881	3.1E-01
rs58999888	6	135778399	t	0.02	-0.17	0.04	3.6E-05	17282	4.7E-01
rs190437164	6	64723684	a	0.01	-0.31	0.08	3.7E-05	11923	6.4E-01
rs75033303	6	141060407	a	0.05	0.11	0.03	3.8E-05	18881	5.4E-01
rs465782	6	111662367	a	0.27	-0.05	0.01	4.0E-05	18881	5.6E-01
rs3819290	6	31322662	a	0.21	-0.06	0.01	4.1E-05	18881	8.9E-01
rs10484759	6	127037042	t	0.24	-0.05	0.01	4.2E-05	18881	4.7E-01
rs7450527	6	142354491	a	0.78	0.05	0.01	4.4E-05	18881	5.9E-01
rs2353325	6	75507330	t	0.90	0.09	0.02	4.6E-05	12731	1.0E-02
rs17208902	6	32379547	t	0.19	-0.06	0.01	4.7E-05	18881	5.7E-01
rs12213816	6	132501393	a	0.32	0.05	0.01	5.0E-05	18881	3.7E-01
rs145550118	6	94242139	c	0.01	-0.26	0.06	5.2E-05	14510	4.9E-01
rs79412903	6	32589935	a	0.02	-0.26	0.06	5.3E-05	10829	3.9E-01
rs78038564	6	142504914	a	0.02	0.18	0.05	5.6E-05	18288	3.4E-02
rs9450260	6	86088947	t	0.12	0.07	0.02	6.1E-05	17119	8.8E-01
rs73015051	6	148849896	a	0.10	0.07	0.02	6.4E-05	18881	2.1E-01
rs146918117	6	120138740	t	0.98	0.28	0.07	6.6E-05	14138	2.8E-01
6:32668705	6	32668705	a	0.39	0.06	0.02	6.7E-05	10047	2.1E-02
rs146577493	6	162639214	t	0.98	0.33	0.08	6.9E-05	7691	3.4E-01
rs9388253	6	123856181	a	0.67	0.05	0.01	7.0E-05	18881	1.3E-01
6:23496150	6	23496150	c	0.99	-0.50	0.13	7.3E-05	8241	8.0E-01
6:39682593	6	39682593	t	1.00	-0.61	0.15	7.3E-05	8166	1.8E-01
rs141920269	6	47383856	a	0.02	-0.21	0.05	7.5E-05	13785	5.1E-01
6:163748123	6	163748123	t	0.02	0.22	0.06	7.5E-05	10047	5.8E-02
6:97030578	6	97030578	a	0.00	0.62	0.16	8.2E-05	8072	6.9E-01
6:31313724	6	31313724	t	0.84	-0.08	0.02	8.3E-05	10047	2.1E-01
rs116823011	6	32673726	a	0.78	0.07	0.02	8.9E-05	10047	7.6E-01
rs9266075	6	31319754	t	0.36	-0.04	0.01	9.5E-05	18881	7.1E-01
rs112925684	6	133474700	a	0.26	-0.05	0.01	9.5E-05	18881	9.2E-01
6:122890981	6	122890981	t	0.99	0.28	0.07	9.6E-05	11083	9.3E-01
rs2523486	6	31350943	t	0.17	0.06	0.01	1.0E-04	18881	7.2E-01
rs10241857	7	135318460	a	0.35	-0.06	0.01	6.0E-08	18881	2.8E-01
7:64165344	7	64165344	a	0.99	-0.58	0.12	1.5E-06	9928	1.0E-02
rs17170378	7	146955688	t	0.10	-0.09	0.02	1.7E-06	18881	6.5E-01
7:63921033	7	63921033	a	0.01	0.66	0.14	2.2E-06	5540	1.4E-02
rs142767594	7	74034281	a	0.04	-0.15	0.03	3.3E-06	17281	6.5E-01
rs3110803	7	135393766	t	0.44	0.06	0.01	4.1E-06	12731	6.8E-01
7:64196055	7	64196055	t	0.01	0.54	0.12	1.0E-05	9928	1.8E-02
rs12673689	7	45918943	a	0.13	0.07	0.02	1.8E-05	18881	2.0E-01
rs13240305	7	92576833	a	0.88	0.07	0.02	2.0E-05	18881	4.0E-01
rs148980792	7	55654084	t	0.96	0.15	0.04	2.3E-05	18584	6.5E-01
rs73267897	7	21335348	t	0.49	-0.06	0.01	2.6E-05	11676	7.9E-01
7:114433341	7	114433341	a	0.00	0.78	0.19	2.7E-05	6150	5.5E-01
rs117251113	7	158459828	t	0.01	0.25	0.06	3.8E-05	17729	6.6E-02
rs12701915	7	4787092	a	0.58	0.04	0.01	4.2E-05	18881	3.8E-01
rs11763211	7	38676809	t	0.40	0.04	0.01	4.2E-05	18881	4.6E-01
rs116943780	7	148775878	t	0.98	-0.19	0.05	4.4E-05	16682	2.1E-02
rs140537244	7	3044077	a	0.01	0.28	0.07	4.6E-05	16882	6.9E-01
rs117041914	7	49808472	a	0.02	0.20	0.05	5.0E-05	16386	2.0E-01
7:4256600	7	4256600	a	0.99	0.30	0.07	5.5E-05	17441	3.3E-01
rs12539569	7	38644914	t	0.03	0.13	0.03	6.1E-05	18881	3.4E-01
rs112595299	7	128017412	a	0.03	0.17	0.04	6.3E-05	17233	2.9E-01
rs62487180	7	153832238	c	0.96	-0.17	0.04	6.3E-05	8285	8.5E-01
rs146976766	7	32648902	a	0.01	-0.35	0.09	6.4E-05	14073	2.4E-01
7:53355294	7	53355294	a	0.00	0.55	0.14	6.7E-05	10161	3.3E-01
7:96653054	7	96653054	a	0.01	-0.25	0.06	6.7E-05	17729	9.7E-02
rs118136337	7	137852117	c	0.02	-0.19	0.05	7.0E-05	18288	2.8E-01
rs7787098	7	132911130	t	0.07	-0.12	0.03	7.1E-05	10047	9.7E-01
7:1817963	7	1817963	a	0.01	-0.61	0.16	7.9E-05	5235	3.9E-02
7:118492324	7	118492324	a	0.01	-0.48	0.12	7.9E-05	8374	5.6E-02
rs151188900	7	87362617	c	0.01	-0.32	0.08	8.2E-05	8360	2.3E-01
rs140190591	7	148530498	a	0.08	-0.12	0.03	9.4E-05	8285	6.4E-01
7:118614726	7	118614726	t	0.01	-0.48	0.12	1.0E-04	6285	3.8E-01
8:81870839	8	81870839	t	0.99	-0.33	0.08	1.7E-05	14281	2.7E-01
8:81870839	8	81870839	t	0.99	-0.33	0.08	1.7E-05	14281	2.7E-01
rs116900616	8	125770914	a	0.04	-0.12	0.03	1.7E-05	18881	6.4E-01
rs150667542	8	48621299	a	0.04	-0.12	0.03	1.9E-05	18881	7.8E-01
rs12547787	8	135735397	a	0.97	0.13	0.03	2.0E-05	18881	3.7E-01
rs17092176	8	20097325	t	0.64	-0.05	0.01	2.1E-05	18881	2.3E-01
rs141084380	8	107536798	a	0.01	-0.33	0.08	2.8E-05	14073	5.1E-02
rs10102650	8	10367049	t	0.32	0.05	0.01	2.9E-05	18881	1.8E-01
rs17055142	8	26201601	t	0.08	0.08	0.02	3.6E-05	18881	4.1E-01
rs2977151	8	12789182	t	0.13	-0.06	0.02	6.0E-05	18881	9.7E-01
rs1402651	8	20877223	a	0.40	-0.04	0.01	6.1E-05	18881	8.6E-02
rs117074385	8	43369269	t	0.03	-0.14	0.04	6.3E-05	18034	7.7E-01
rs193254696	8	120060298	a	0.00	-0.55	0.14	6.4E-05	9928	3.5E-01
rs143642085	8	107287216	t	0.01	-0.46	0.11	6.5E-05	8678	4.4E-01
rs34046390	8	42712654	c	0.97	0.13	0.03	7.0E-05	18034	7.1E-01
8:107533429	8	107533429	a	1.00	-0.66	0.17	7.3E-05	6721	5.1E-01
8:32036364	8	32036364	a	1.00	0.71	0.18	9.0E-05	6379	6.4E-01
rs17646897	8	8946376	a	0.35	0.04	0.01	9.0E-05	18881	6.6E-01
8:144194547	8	144194547	a	0.99	0.44	0.11	9.2E-05	6889	3.0E-01
rs118023716	8	3342790	t	0.96	0.11	0.03	1.0E-04	18034	4.4E-01
rs117063357	9	94079236	t	0.02	-0.21	0.05	8.8E-06	14281	9.8E-01
rs12553169	9	118082239	a	0.84	-0.06	0.01	1.4E-05	18881	1.8E-01
9:12255497	9	12255497	a	0.99	-0.41	0.10	1.7E-05	13825	5.5E-01
rs2627014	9	84327424	t	0.53	0.04	0.01	2.0E-05	18881	2.5E-02
9:37717167	9	37717167	c	0.99	-0.28	0.07	2.5E-05	17441	6.0E-02
9:104375385	9	104375385	t	0.00	-0.51	0.12	3.5E-05	8145	4.8E-01
rs79766510	9	21462526	t	0.02	0.17	0.04	4.0E-05	18288	5.3E-01
rs12347619	9	17910983	t	0.08	-0.15	0.04	4.5E-05	7531	3.0E-01
rs148759338	9	111313663	t	0.00	-0.69	0.17	5.1E-05	6150	7.9E-01
rs143881755	9	21620180	a	0.01	-0.25	0.06	5.6E-05	14632	7.7E-01
rs1571837	9	2329724	a	0.23	-0.05	0.01	5.9E-05	18881	1.3E-01
rs13285999	9	75225705	a	0.47	-0.04	0.01	6.8E-05	18881	6.0E-01
rs2277162	9	84305700	t	0.25	-0.05	0.01	7.6E-05	18881	4.1E-02
rs76574146	9	139135964	t	0.92	0.09	0.02	7.6E-05	18584	9.8E-01
rs138714042	9	73172605	t	0.98	-0.27	0.07	7.9E-05	10732	4.6E-01
rs1998973	9	113142196	a	0.91	-0.07	0.02	9.4E-05	18881	3.9E-01
rs62575263	9	118353966	a	0.12	0.06	0.02	1.0E-04	18881	2.4E-01
rs703066	10	16937562	a	0.60	-0.05	0.01	1.6E-06	18881	6.7E-01
rs9783189	10	8411320	a	0.62	-0.06	0.01	2.5E-06	12731	8.2E-01
rs58790726	10	70240379	c	0.42	0.05	0.01	3.5E-06	18881	5.0E-01
rs117452592	10	70172332	a	0.03	0.16	0.04	6.1E-06	18026	8.6E-01
rs10787469	10	114604007	c	0.54	0.05	0.01	1.4E-05	18881	3.4E-01
rs148974918	10	112033051	t	0.05	-0.11	0.03	1.6E-05	18881	6.2E-01
rs1986851	10	123897915	t	0.01	-0.66	0.15	1.6E-05	5154	6.3E-01
rs1649068	10	60304864	a	0.47	-0.05	0.01	1.9E-05	18881	7.9E-01
rs71477515	10	72554625	a	0.13	0.08	0.02	2.4E-05	11428	3.2E-01
10:86964503	10	86964503	t	0.01	0.30	0.07	3.4E-05	17233	7.3E-01
10:403587	10	403587	a	0.01	-0.49	0.12	3.6E-05	6379	8.9E-01
10:201776	10	201776	a	0.01	-0.49	0.12	3.8E-05	6379	9.6E-01
10:363602	10	363602	t	0.99	0.46	0.11	4.2E-05	6379	9.6E-01
10:373958	10	373958	a	0.01	-0.46	0.11	4.4E-05	6379	8.0E-01
rs147507776	10	17060488	t	0.01	-0.36	0.09	5.8E-05	9806	7.7E-01
rs2590376	10	60057136	c	0.90	-0.10	0.03	6.3E-05	8285	3.2E-01
10:109737675	10	109737675	t	1.00	0.43	0.11	7.1E-05	10681	8.2E-01
10:109732486	10	109732486	t	1.00	0.43	0.11	7.1E-05	10681	8.2E-01
rs76217774	10	135295214	a	0.01	-0.25	0.06	7.4E-05	13376	2.9E-01
10:68138070	10	68138070	t	0.00	0.50	0.13	7.5E-05	9200	8.2E-01
10:109738805	10	109738805	a	1.00	0.43	0.11	7.5E-05	10681	8.1E-01
10:129119094	10	129119094	t	0.01	0.31	0.08	8.0E-05	13226	7.1E-01
rs117808865	10	113227641	a	0.02	0.20	0.05	8.4E-05	16682	5.9E-01
rs111617423	10	108963340	a	0.03	0.20	0.05	8.8E-05	12731	2.2E-01
10:83158731	10	83158731	a	0.01	-0.39	0.10	1.0E-04	13151	4.2E-02
rs72850555	11	9348199	a	0.01	0.28	0.06	1.0E-06	16386	7.2E-01
rs7926190	11	68409963	a	0.27	-0.06	0.01	2.4E-06	18881	2.0E-01
rs7937148	11	134379060	a	0.03	-0.14	0.03	4.1E-06	18881	6.0E-01
11:63627827	11	63627827	t	0.01	0.52	0.12	8.3E-06	7076	4.3E-01
rs4930254	11	68733091	a	0.63	0.07	0.02	1.1E-05	8285	2.8E-01
rs80245812	11	95351117	a	0.03	0.15	0.03	1.6E-05	18881	4.3E-01
rs61901918	11	131367967	a	0.95	-0.11	0.03	3.5E-05	18881	1.6E-01
rs75603389	11	21655881	t	0.06	-0.10	0.02	4.0E-05	18881	5.3E-01
rs117842198	11	68709890	a	0.02	0.22	0.05	4.5E-05	17233	7.1E-01
11:5808186	11	5808186	c	0.00	-0.48	0.12	7.0E-05	9448	8.6E-01
rs3018165	11	77638744	t	0.38	0.06	0.02	7.3E-05	8285	3.7E-02
11:4640806	11	4640806	c	0.99	-0.40	0.10	8.1E-05	9448	6.9E-01
rs151064063	11	25830877	a	0.01	-0.21	0.05	8.4E-05	16386	6.3E-01
11:9147671	11	9147671	a	0.00	0.44	0.11	8.7E-05	12376	9.5E-01
rs7944938	11	29778264	a	0.14	-0.06	0.02	8.8E-05	18881	8.1E-01
rs4436549	11	63843197	t	0.02	-0.18	0.05	9.0E-05	17529	2.4E-01
rs552306	11	102676157	a	0.57	-0.04	0.01	9.3E-05	18881	9.1E-02
rs756152	11	15121130	t	0.60	0.04	0.01	1.0E-04	18881	7.6E-01
rs67624109	12	123824635	t	0.22	0.07	0.01	1.0E-08	18881	3.3E-01
rs3217859	12	4399036	a	0.17	0.08	0.01	1.5E-07	18881	8.9E-01
12:123786492	12	123786492	t	0.78	-0.09	0.02	2.4E-07	10047	5.1E-02
rs3217827	12	4392391	a	0.49	-0.05	0.01	7.3E-07	18881	6.2E-01
rs7306710	12	66376091	t	0.47	0.05	0.01	1.3E-06	18881	2.6E-01
12:83276248	12	83276248	t	0.01	-0.41	0.09	1.4E-05	11593	2.0E-01
rs3764010	12	27845924	t	0.69	-0.05	0.01	1.5E-05	18881	7.0E-01
rs117317686	12	65262952	c	0.97	0.16	0.04	2.1E-05	16682	8.4E-01
rs34230992	12	97703885	a	0.06	0.10	0.02	2.2E-05	18881	3.6E-01
12:87542616	12	87542616	t	0.98	0.46	0.11	2.2E-05	7438	8.4E-01
rs2350	12	55085208	a	0.88	-0.07	0.02	2.2E-05	18881	6.5E-01
rs7309494	12	53825993	a	0.81	-0.06	0.01	2.3E-05	18881	7.3E-01
rs1593852	12	20381100	c	0.45	0.05	0.01	2.4E-05	18881	6.3E-01
rs143916814	12	70397556	a	0.01	0.26	0.06	2.6E-05	16386	3.3E-01
rs73100117	12	32700788	t	0.14	0.06	0.02	2.7E-05	18881	5.8E-01
rs10783306	12	49516946	c	0.33	0.05	0.01	2.9E-05	18881	3.7E-01
rs1019315	12	97594620	t	0.68	-0.05	0.01	3.1E-05	18881	5.7E-01
rs10875941	12	49667921	t	0.75	-0.05	0.01	3.9E-05	18881	1.3E-01
rs10844083	12	32140903	a	0.80	-0.05	0.01	5.0E-05	18881	7.5E-02
rs2277325	12	58203377	a	0.02	-0.17	0.04	5.3E-05	17529	3.4E-01
rs61931710	12	124687345	t	0.96	-0.12	0.03	5.4E-05	18881	7.5E-01
rs17340879	12	14290517	t	0.97	0.15	0.04	5.6E-05	16683	5.7E-01
rs2683522	12	53783396	t	0.19	0.05	0.01	6.3E-05	18881	8.9E-01
12:3763001	12	3763001	t	0.00	0.63	0.16	6.3E-05	6358	4.6E-01
rs773114	12	56379060	a	0.60	-0.04	0.01	6.6E-05	18881	5.0E-01
12:133440830	12	133440830	t	0.01	-0.32	0.08	6.8E-05	16882	5.8E-01
rs187734227	12	64859107	a	0.01	0.25	0.06	6.8E-05	13523	9.9E-01
rs2555268	12	119604290	t	0.08	0.08	0.02	6.8E-05	18881	5.0E-01
rs60041429	12	129915307	a	0.01	0.26	0.07	7.1E-05	16882	3.7E-01
rs117815843	12	74464007	a	0.96	-0.12	0.03	7.5E-05	17529	1.7E-01
12:82749187	12	82749187	t	1.00	0.77	0.19	7.8E-05	5443	7.4E-01
rs139567758	12	112164268	a	0.98	0.19	0.05	8.2E-05	17529	3.8E-01
12:104445820	12	104445820	a	0.01	0.46	0.12	8.3E-05	7132	1.6E-01
12:63785094	12	63785094	t	0.00	0.41	0.10	8.4E-05	13832	6.9E-01
rs111873468	12	58929066	t	0.98	0.16	0.04	8.5E-05	18881	8.8E-01
rs2066827	12	12871099	t	0.76	0.05	0.01	9.3E-05	18881	3.6E-01
rs7957034	12	97754671	a	0.90	-0.08	0.02	9.8E-05	17826	2.8E-01
rs190434613	12	67728969	t	0.98	0.16	0.04	1.0E-04	18288	7.3E-01
rs3847883	12	97580029	t	0.33	0.04	0.01	1.0E-04	18881	4.7E-01
rs113501787	13	81476734	t	0.08	-0.10	0.02	2.7E-06	18881	5.3E-01
rs75710920	13	78633974	t	0.83	-0.06	0.01	6.3E-06	18881	7.1E-01
13:115092676	13	115092676	a	0.01	0.40	0.09	1.1E-05	11923	1.3E-01
13:115096095	13	115096095	a	0.01	0.40	0.09	1.4E-05	11923	1.4E-01
13:21060705	13	21060705	t	0.99	-0.34	0.08	1.9E-05	10983	7.7E-01
13:115075311	13	115075311	t	0.01	0.62	0.15	2.5E-05	6383	2.7E-01
rs9601627	13	82087510	a	0.88	0.07	0.02	2.7E-05	18881	5.3E-01
rs9593534	13	81661883	a	0.32	-0.05	0.01	2.9E-05	18881	8.4E-01
13:114524548	13	114524548	c	0.00	0.54	0.13	2.9E-05	9834	2.3E-02
rs140668091	13	40544710	t	0.01	0.25	0.06	3.3E-05	15827	8.6E-01
rs56147942	13	19257911	a	0.05	-0.15	0.04	5.0E-05	8141	7.9E-01
rs1980745	13	26525464	a	0.33	-0.05	0.01	5.2E-05	18881	4.5E-01
rs1744589	13	81281562	t	0.15	-0.08	0.02	5.5E-05	10047	8.5E-01
13:42277671	13	42277671	a	0.99	-0.23	0.06	5.9E-05	15752	8.8E-02
rs190416909	13	74218050	a	0.08	0.12	0.03	6.2E-05	8285	1.3E-01
rs148248620	13	67019736	a	0.90	0.12	0.03	6.2E-05	8285	1.6E-01
rs150434093	13	45664449	a	0.02	0.19	0.05	6.2E-05	16682	7.7E-01
rs117163311	13	109623686	t	0.11	0.07	0.02	9.8E-05	18881	1.9E-01
rs17071323	13	78556214	t	0.15	0.06	0.01	1.0E-04	18881	3.2E-01
rs10148050	14	71155984	a	0.81	0.06	0.01	9.1E-06	18881	3.8E-01
14:96226853	14	96226853	a	0.01	-0.47	0.11	1.1E-05	10597	5.0E-01
14:97208301	14	97208301	a	0.01	0.45	0.10	1.2E-05	5936	4.5E-01
rs58956968	14	35197903	c	0.76	0.07	0.02	2.3E-05	10047	1.8E-01
14:36003426	14	36003426	t	0.99	0.26	0.06	3.7E-05	13785	4.6E-01
14:51089823	14	51089823	a	1.00	-0.64	0.16	4.0E-05	6383	4.8E-01
14:58576373	14	58576373	a	1.00	0.51	0.13	5.2E-05	9200	2.4E-01
rs140917009	14	57375047	a	0.02	-0.15	0.04	5.5E-05	18881	2.4E-01
rs34670566	14	101286731	t	0.90	0.08	0.02	7.1E-05	18881	2.8E-01
14:79833389	14	79833389	t	0.01	0.21	0.05	8.4E-05	17729	8.0E-01
rs11160514	14	99812105	t	0.26	-0.05	0.01	8.4E-05	18881	8.7E-03
rs2890039	14	32503366	c	0.33	0.04	0.01	8.5E-05	18881	6.0E-01
rs76354420	14	85066093	a	0.07	-0.09	0.02	9.1E-05	18881	6.2E-01
rs73341526	14	95280004	t	0.01	-0.28	0.07	9.4E-05	16882	3.1E-01
rs12885263	14	91602719	c	0.38	-0.04	0.01	9.7E-05	18881	7.3E-01
rs142904994	14	86171242	t	0.98	-0.19	0.05	1.0E-04	16386	7.3E-01
rs4775307	15	61159196	t	0.01	-0.30	0.07	1.0E-05	14281	9.6E-01
rs4778708	15	79862903	t	0.26	-0.05	0.01	1.6E-05	18881	6.2E-02
rs8028391	15	69986486	a	0.98	0.21	0.05	2.0E-05	16227	8.4E-01
rs12898397	15	75130093	t	0.40	-0.04	0.01	3.2E-05	18881	4.8E-01
rs150302	15	89946789	c	0.51	-0.04	0.01	3.2E-05	18881	5.0E-01
15:97622893	15	97622893	a	0.01	-0.47	0.11	3.3E-05	10440	9.5E-01
rs148052648	15	73164580	c	0.01	0.23	0.06	4.5E-05	17233	1.2E-01
rs4932194	15	89245239	a	0.65	0.04	0.01	4.5E-05	18881	9.3E-04
rs143534520	15	82495385	t	0.02	0.17	0.04	5.1E-05	18585	4.5E-01
rs72740237	15	53013213	a	0.75	0.05	0.01	5.6E-05	18881	9.1E-01
15:80472845	15	80472845	a	1.00	-0.65	0.16	5.7E-05	6383	3.0E-01
rs12909047	15	74782356	a	0.49	0.04	0.01	5.7E-05	18881	1.3E-01
rs4924471	15	40744046	t	0.09	0.08	0.02	5.8E-05	18881	5.2E-01
15:80487873	15	80487873	a	1.00	-0.74	0.19	6.8E-05	6383	3.9E-01
rs1497809	15	36144105	t	0.31	0.05	0.01	7.6E-05	18881	9.4E-01
rs147216095	15	85246669	t	0.01	-0.25	0.06	8.0E-05	17233	3.0E-01
rs182754594	15	30233084	t	0.01	0.29	0.07	8.1E-05	14887	9.9E-01
rs7170697	15	96749826	a	0.80	-0.07	0.02	8.2E-05	10047	4.2E-01
rs77479802	15	93893098	t	0.07	0.09	0.02	8.4E-05	18881	1.6E-01
rs189104988	15	40970520	a	0.02	0.18	0.05	9.6E-05	18584	7.2E-01
15:80349406	15	80349406	t	0.00	0.58	0.15	9.7E-05	6383	2.7E-01
rs28422175	15	79837508	c	0.24	-0.05	0.01	1.0E-04	18881	2.5E-01
16:4034348	16	4034348	t	0.01	0.39	0.08	2.3E-06	14524	5.0E-02
rs71372800	16	89356701	c	0.22	0.08	0.02	4.9E-06	10047	4.9E-01
rs26852	16	2261657	a	0.47	-0.05	0.01	1.1E-05	18881	7.3E-01
rs142856662	16	10327985	a	0.01	0.34	0.08	1.3E-05	13832	3.2E-01
16:83448885	16	83448885	a	0.01	-0.33	0.08	1.7E-05	14073	8.4E-01
rs34033440	16	89539755	t	0.05	0.11	0.02	2.2E-05	18881	5.5E-01
rs7202426	16	55754793	a	0.02	0.15	0.04	4.0E-05	18881	1.5E-01
rs112077269	16	80431386	a	0.05	-0.16	0.04	4.3E-05	10047	8.0E-01
rs1990688	16	48878785	t	0.82	-0.06	0.01	5.1E-05	18881	3.5E-01
rs150699629	16	19703266	a	0.02	0.17	0.04	5.7E-05	18881	7.5E-01
rs166666	16	24910886	a	0.24	0.06	0.02	6.6E-05	12731	3.8E-01
16:86335180	16	86335180	a	0.98	0.36	0.09	7.0E-05	10047	9.4E-01
16:63570434	16	63570434	a	0.02	0.27	0.07	7.4E-05	16682	5.0E-02
16:73499427	16	73499427	t	0.01	0.40	0.10	8.8E-05	10746	8.5E-01
16:64091861	16	64091861	t	0.00	0.51	0.13	9.1E-05	9469	7.8E-01
16:12010960	16	12010960	t	1.00	0.48	0.12	9.2E-05	11923	5.4E-01
16:6501570	16	6501570	a	0.99	-0.44	0.11	9.7E-05	9834	9.9E-01
rs117863397	16	85548433	t	0.01	-0.41	0.11	9.7E-05	8447	9.4E-01
rs4467071	16	55755760	a	0.03	0.13	0.03	1.1E-04	18881	2.1E-01
rs35850753	17	7578671	t	0.02	0.22	0.04	2.0E-08	18584	2.1E-01
rs4989898	17	11991865	a	0.55	-0.07	0.02	1.1E-05	8285	4.9E-01
rs626657	17	37332963	a	0.13	-0.07	0.02	1.2E-05	18881	2.0E-01
17:9062098	17	9062098	a	0.01	-0.41	0.10	3.6E-05	12136	7.7E-01
rs78096421	17	47124760	t	0.96	0.11	0.03	3.8E-05	18881	8.0E-01
17:9056860	17	9056860	a	0.01	-0.40	0.10	3.9E-05	12136	7.5E-01
17:9174960	17	9174960	a	0.01	-0.26	0.06	4.2E-05	16882	8.5E-01
rs183628831	17	58045891	t	0.01	0.38	0.09	4.7E-05	8145	1.1E-01
rs8081274	17	79672355	a	0.84	-0.06	0.01	4.8E-05	18881	4.7E-01
rs189190107	17	76902450	a	0.98	-0.22	0.05	5.4E-05	17441	3.9E-01
rs116717883	17	65022655	a	0.92	0.11	0.03	6.9E-05	10047	4.7E-01
17:2900155	17	2900155	a	0.99	-0.59	0.15	7.5E-05	6477	6.2E-01
17:49312108	17	49312108	a	0.00	0.49	0.13	8.5E-05	10440	6.2E-01
rs112979959	17	38115873	t	0.89	-0.07	0.02	1.1E-04	18881	9.9E-01
18:72772599	18	72772599	t	0.99	-0.34	0.07	3.6E-06	11542	5.7E-01
rs117088484	18	56367209	t	0.02	0.17	0.04	1.1E-05	18034	3.5E-01
rs78168368	18	63459183	c	0.98	0.22	0.05	2.6E-05	11892	5.5E-01
rs75547571	18	32772723	a	0.02	0.19	0.05	3.1E-05	17737	8.3E-01
18:20985964	18	20985964	t	0.01	0.30	0.07	3.3E-05	15827	4.1E-01
18:8292261	18	8292261	c	0.99	0.29	0.07	3.3E-05	16882	5.4E-04
18:20897405	18	20897405	t	0.01	0.30	0.07	5.0E-05	15827	8.7E-01
18:60235896	18	60235896	t	0.99	-0.44	0.11	5.1E-05	9444	9.2E-02
rs79177709	18	65376023	t	0.99	0.39	0.10	6.6E-05	6721	8.0E-01
rs117664641	18	56702076	t	0.06	0.12	0.03	7.9E-05	12731	9.5E-01
rs150104399	18	63371544	t	0.01	-0.33	0.09	1.0E-04	12494	6.5E-01
rs2571145	19	44903916	a	0.71	0.06	0.01	9.2E-06	17119	5.9E-01
rs17708332	19	15730101	t	0.81	0.06	0.01	3.4E-05	18881	4.3E-01
19:8613642	19	8613642	a	0.01	0.45	0.11	3.6E-05	10746	6.3E-01
19:8254543	19	8254543	c	1.00	-0.68	0.17	4.0E-05	5540	7.9E-01
19:1137743	19	1137743	t	0.04	-0.24	0.06	4.4E-05	6379	6.5E-01
rs12979350	19	556525	c	0.49	0.04	0.01	4.7E-05	18881	4.1E-01
rs6510760	19	3565253	a	0.06	0.10	0.03	4.8E-05	18881	5.2E-01
rs12709876	19	44895147	a	0.90	0.07	0.02	5.2E-05	18881	1.0E-01
rs73043217	19	41688444	t	0.16	0.06	0.02	5.2E-05	18881	9.0E-01
rs117038522	19	55629218	c	0.02	0.16	0.04	5.6E-05	18584	3.8E-01
rs2974249	19	48076721	a	0.06	-0.09	0.02	5.9E-05	18881	2.3E-01
19:58269156	19	58269156	t	0.00	0.44	0.11	5.9E-05	10234	5.6E-01
19:42703740	19	42703740	a	0.01	-0.50	0.12	6.2E-05	5651	1.6E-01
19:41321748	19	41321748	a	0.99	-0.27	0.07	6.5E-05	9200	3.0E-01
19:41321753	19	41321753	a	0.99	-0.27	0.07	6.5E-05	9200	3.0E-01
19:48605640	19	48605640	t	0.97	-0.21	0.05	6.7E-05	10047	6.4E-01
rs28371526	19	15774605	t	0.18	-0.05	0.01	1.0E-04	18881	3.5E-01
rs6061792	20	60322851	t	0.73	0.06	0.01	4.0E-06	18881	7.6E-01
rs73133684	20	50293039	t	0.02	0.16	0.04	1.4E-05	18881	7.4E-02
rs150180074	20	43224014	a	0.02	0.31	0.07	1.8E-05	9598	2.0E-01
20:22150956	20	22150956	t	0.00	-0.71	0.17	1.9E-05	8145	1.0E+00
rs4809531	20	61331678	a	0.62	0.05	0.01	2.2E-05	18881	4.9E-01
rs2424333	20	20278144	t	0.41	0.04	0.01	3.6E-05	18881	1.6E-01
rs2422858	20	3131488	t	0.34	-0.06	0.01	3.6E-05	12731	5.8E-01
rs742640	20	42554681	t	0.97	0.13	0.03	4.4E-05	18881	7.6E-01
20:60842038	20	60842038	t	0.01	0.59	0.14	4.6E-05	6358	5.5E-01
rs118095528	20	4920236	t	0.03	0.16	0.04	5.8E-05	18034	9.3E-01
rs117654023	20	55237432	t	0.01	0.32	0.08	6.6E-05	10440	3.9E-01
rs6029657	20	40026676	c	0.33	-0.04	0.01	7.9E-05	18881	5.1E-01
rs147959871	20	47061938	c	0.01	0.37	0.09	7.9E-05	8145	5.8E-01
rs142222872	20	44236390	t	0.99	0.36	0.09	7.9E-05	8700	3.7E-01
rs6121780	20	59979711	t	0.07	0.09	0.02	8.9E-05	18881	4.5E-01
20:18903947	20	18903947	a	1.00	0.62	0.16	9.1E-05	7839	4.7E-03
20:21906768	20	21906768	a	0.01	-0.38	0.10	9.4E-05	10440	2.3E-01
rs6129731	20	39660687	a	0.68	0.04	0.01	1.0E-04	18881	4.9E-01
rs6061350	20	60338026	a	0.28	-0.05	0.01	1.0E-04	18881	5.5E-01
rs189629782	21	27061330	t	0.98	-0.17	0.04	2.1E-05	18584	8.2E-01
rs139406961	21	35447840	c	0.03	-0.17	0.04	2.6E-05	17441	9.7E-01
21:41683045	21	41683045	c	0.00	-0.53	0.13	4.6E-05	8145	9.4E-01
rs2844303	21	23226656	a	0.08	-0.10	0.03	4.7E-05	12731	2.4E-01
21:42839661	21	42839661	t	0.01	-0.32	0.08	6.4E-05	11137	6.8E-01
rs59764913	21	46337127	a	0.02	0.16	0.04	7.9E-05	17738	2.7E-01
rs2026270	21	41342758	t	0.16	-0.06	0.02	8.4E-05	18881	2.6E-01
rs117724801	21	41345773	a	0.99	0.29	0.08	8.5E-05	9537	9.1E-01
rs142965874	21	18850134	a	0.01	0.18	0.05	1.1E-04	18584	5.2E-01
rs45532834	22	28157748	t	0.02	0.18	0.04	9.5E-06	16280	4.0E-01
22:19926530	22	19926530	t	1.00	-0.55	0.12	9.8E-06	11537	9.4E-01
rs79847867	22	16495833	a	0.09	-0.17	0.04	1.2E-05	6379	3.5E-01
22:36879126	22	36879126	a	0.00	-0.65	0.15	1.8E-05	6150	3.7E-01
rs8140034	22	33604383	a	0.80	-0.07	0.02	3.7E-05	12731	3.0E-01
rs16993225	22	23154058	t	0.16	0.10	0.02	3.7E-05	7839	7.2E-01
rs1029696	22	17703572	t	0.56	0.06	0.02	4.0E-05	8285	8.3E-01
22:40092487	22	40092487	t	0.00	0.58	0.14	4.4E-05	8145	3.0E-01
22:40318938	22	40318938	t	0.01	0.51	0.13	6.6E-05	8166	4.9E-01
rs66473469	22	36662654	a	0.94	0.11	0.03	7.4E-05	17826	7.3E-01
rs6007174	22	46267946	a	0.83	0.06	0.01	1.3E-04	18881	1.4E-01
rs26831	16	2241484	c	0.51	0.04	0.01	2.9E-05	18881	8.9E-01
rs26866	16	2250731	a	0.48	-0.04	0.01	3.1E-05	18881	9.6E-01
rs27556	16	2249325	t	0.47	-0.04	0.01	3.6E-05	18881	9.7E-01
rs26867	16	2249410	t	0.47	-0.04	0.01	3.6E-05	18881	9.7E-01
rs3160	16	2259191	t	0.53	-0.04	0.01	4.1E-05	18881	6.6E-01
rs26835	16	2237549	t	0.44	0.04	0.01	4.2E-05	18881	4.7E-01
rs112077269	16	80431386	a	0.05	-0.16	0.04	4.3E-05	10047	8.0E-01
rs26858	16	2259766	a	0.49	-0.05	0.01	4.6E-05	18881	9.5E-01
rs26857	16	2260567	t	0.47	0.04	0.01	4.7E-05	18881	9.4E-01
rs26829	16	2243305	a	0.46	-0.04	0.01	4.8E-05	18881	9.7E-01
rs3102349	16	89376945	t	0.20	0.05	0.01	4.9E-05	18881	2.0E-01
rs27381	16	2239402	t	0.43	0.04	0.01	5.7E-05	18881	3.8E-01
rs26865	16	2253773	a	0.47	-0.04	0.01	6.0E-05	18881	9.7E-01
rs3114885	16	89420230	a	0.06	0.09	0.02	6.2E-05	18881	3.8E-01
rs26869	16	2248786	t	0.47	-0.04	0.01	6.3E-05	18881	9.7E-01
rs3114866	16	89432465	a	0.05	0.10	0.02	6.8E-05	18881	3.8E-01
16:86335180	16	86335180	a	0.98	0.36	0.09	7.0E-05	10047	9.4E-01
rs30995	16	2248017	a	0.46	-0.04	0.01	7.1E-05	18881	9.7E-01
16:63570434	16	63570434	a	0.02	0.27	0.07	7.4E-05	16682	5.0E-02
rs3890012	16	89464324	a	0.06	0.09	0.02	7.9E-05	18881	4.6E-01
rs27699	16	2256326	t	0.48	0.04	0.01	8.6E-05	18881	8.9E-01
16:73499427	16	73499427	t	0.01	0.40	0.10	8.8E-05	10746	8.5E-01
16:64091861	16	64091861	t	0.00	0.51	0.13	9.1E-05	9469	7.8E-01
16:12010960	16	12010960	t	1.00	0.48	0.12	9.2E-05	11923	5.4E-01
16:6501570	16	6501570	a	0.99	-0.44	0.11	9.7E-05	9834	9.9E-01
rs117863397	16	85548433	t	0.01	-0.41	0.11	9.7E-05	8447	9.4E-01
rs26863	16	2256461	c	0.52	-0.04	0.01	9.9E-05	18881	9.0E-01
rs26833	16	2238273	a	0.42	0.04	0.01	1.0E-04	18881	3.3E-01
rs35850753	17	7578671	t	0.02	0.22	0.04	2.0E-08	18584	2.1E-01
rs4989898	17	11991865	a	0.55	-0.07	0.02	1.1E-05	8285	4.9E-01
17:9062098	17	9062098	a	0.01	-0.41	0.10	3.6E-05	12136	7.7E-01
17:9056860	17	9056860	a	0.01	-0.40	0.10	3.9E-05	12136	7.5E-01
rs78096421	17	47124760	t	0.96	0.11	0.03	4.0E-05	18881	8.0E-01
17:9174960	17	9174960	a	0.01	-0.26	0.06	4.2E-05	16882	8.5E-01
rs12936880	17	12010680	a	0.26	0.07	0.02	4.4E-05	10047	1.4E-01
rs183628831	17	58045891	t	0.01	0.38	0.09	4.7E-05	8145	1.1E-01
rs189190107	17	76902450	a	0.98	-0.22	0.05	5.4E-05	17441	3.9E-01
rs117273011	17	57936287	c	0.01	0.35	0.09	6.0E-05	8145	1.5E-01
rs187345417	17	57966688	a	0.99	-0.36	0.09	6.3E-05	8145	1.7E-01
rs116717883	17	65022655	a	0.92	0.11	0.03	6.9E-05	10047	4.7E-01
rs626657	17	37332963	a	0.13	-0.06	0.02	7.2E-05	18881	2.8E-01
rs7212919	17	36894768	a	0.94	0.09	0.02	7.4E-05	18881	7.2E-02
17:2900155	17	2900155	a	0.99	-0.59	0.15	7.5E-05	6477	6.2E-01
rs112979959	17	38115873	t	0.89	-0.07	0.02	7.8E-05	18881	9.6E-01
rs72832987	17	38118468	a	0.89	-0.07	0.02	7.9E-05	18881	9.4E-01
rs111690387	17	38119882	a	0.11	0.07	0.02	8.2E-05	18881	9.5E-01
17:49312108	17	49312108	a	0.00	0.49	0.13	8.5E-05	10440	6.2E-01
rs113358708	17	40543297	t	0.96	-0.14	0.04	8.7E-05	12731	1.6E-01
rs113510790	17	38118010	t	0.11	0.07	0.02	9.3E-05	18881	9.5E-01
rs111522131	17	38116225	a	0.89	-0.07	0.02	9.5E-05	18881	9.5E-01
rs112570995	17	38116212	a	0.11	0.07	0.02	9.5E-05	18881	9.5E-01
rs72832991	17	38119448	t	0.11	0.07	0.02	9.7E-05	18881	9.5E-01
rs72832988	17	38118541	a	0.11	0.07	0.02	9.9E-05	18881	9.5E-01
rs17884306	17	7572101	t	0.05	0.09	0.02	1.0E-04	18881	5.6E-01
18:72772599	18	72772599	t	0.99	-0.34	0.07	3.6E-06	11542	5.7E-01
18:72772599	18	72772599	t	0.99	-0.34	0.07	3.6E-06	11542	5.7E-01
rs117088484	18	56367209	t	0.02	0.17	0.04	6.0E-06	18034	3.0E-01
rs117664641	18	56702076	t	0.06	0.13	0.03	2.7E-05	12731	9.8E-01
rs75547571	18	32772723	a	0.02	0.19	0.05	3.1E-05	17737	8.3E-01
rs140159970	18	32780327	t	0.98	-0.19	0.05	3.1E-05	17737	7.6E-01
18:20985964	18	20985964	t	0.01	0.30	0.07	3.3E-05	15827	4.1E-01
18:8292261	18	8292261	c	0.99	0.29	0.07	3.3E-05	16882	5.4E-04
rs78168368	18	63459183	c	0.98	0.22	0.05	3.4E-05	11892	5.7E-01
rs62084073	18	11578157	t	0.75	-0.06	0.01	4.2E-05	18881	1.9E-01
rs28654123	18	33003857	a	0.02	0.17	0.04	4.3E-05	17737	4.4E-01
18:20897405	18	20897405	t	0.01	0.30	0.07	5.0E-05	15827	8.7E-01
18:60235896	18	60235896	t	0.99	-0.44	0.11	5.1E-05	9444	9.2E-02
rs79177709	18	65376023	t	0.99	0.39	0.10	6.6E-05	6721	8.0E-01
rs11081910	18	33085617	t	0.24	0.05	0.01	7.1E-05	18881	5.8E-01
rs116884711	18	47640772	a	0.02	0.17	0.04	7.3E-05	17530	6.5E-01
rs7504367	18	11566594	t	0.11	0.07	0.02	9.3E-05	18881	1.3E-01
rs150104399	18	63371544	t	0.01	-0.33	0.09	1.0E-04	12494	6.5E-01
rs17708332	19	15730101	t	0.81	0.06	0.01	2.8E-05	18881	4.6E-01
rs6510760	19	3565253	a	0.06	0.10	0.03	3.4E-05	18881	3.9E-01
19:8613642	19	8613642	a	0.01	0.45	0.11	3.6E-05	10746	6.3E-01
19:8254543	19	8254543	c	1.00	-0.68	0.17	4.0E-05	5540	7.9E-01
rs2571145	19	44903916	a	0.71	0.05	0.01	4.3E-05	17119	2.4E-01
rs117038522	19	55629218	c	0.02	0.16	0.04	5.6E-05	18584	3.8E-01
19:58269156	19	58269156	t	0.00	0.44	0.11	5.9E-05	10234	5.6E-01
19:42703740	19	42703740	a	0.01	-0.50	0.12	6.2E-05	5651	1.6E-01
19:41321748	19	41321748	a	0.99	-0.27	0.07	6.5E-05	9200	3.0E-01
19:41321753	19	41321753	a	0.99	-0.27	0.07	6.5E-05	9200	3.0E-01
19:48605640	19	48605640	t	0.97	-0.21	0.05	6.7E-05	10047	6.4E-01
rs12979350	19	556525	c	0.49	0.04	0.01	9.2E-05	18881	3.7E-01
rs138151168	19	7135282	a	0.01	-0.47	0.12	1.0E-04	5834	4.5E-01
rs150180074	20	43224014	a	0.02	0.31	0.07	1.8E-05	9598	2.0E-01
20:22150956	20	22150956	t	0.00	-0.71	0.17	1.9E-05	8145	1.0E+00
rs6061792	20	60322851	t	0.73	0.05	0.01	2.2E-05	18881	7.7E-01
rs3761304	20	61333195	a	0.28	-0.05	0.01	2.6E-05	18881	4.7E-02
rs73133684	20	50293039	t	0.02	0.16	0.04	2.7E-05	18881	6.1E-02
rs6061349	20	60336002	t	0.70	0.05	0.01	2.9E-05	18881	8.0E-01
rs6122114	20	61331385	a	0.28	-0.05	0.01	4.3E-05	18881	3.2E-02
rs6062878	20	61329423	t	0.62	0.04	0.01	4.5E-05	18881	2.5E-01
20:60842038	20	60842038	t	0.01	0.59	0.14	4.6E-05	6358	5.5E-01
rs2427398	20	61329300	a	0.71	0.05	0.01	5.0E-05	18881	3.7E-02
rs742640	20	42554681	t	0.97	0.13	0.03	5.1E-05	18881	7.5E-01
rs4809531	20	61331678	a	0.62	0.04	0.01	5.2E-05	18881	3.4E-01
rs2277773	20	61335090	a	0.67	0.05	0.01	5.8E-05	18881	2.2E-01
rs2427399	20	61331445	a	0.28	-0.05	0.01	6.0E-05	18881	3.5E-02
rs3761303	20	61333430	c	0.63	0.04	0.01	6.0E-05	18881	3.5E-01
rs6121780	20	59979711	t	0.07	0.09	0.02	6.4E-05	18881	5.6E-01
rs2245758	20	61334766	a	0.33	-0.05	0.01	6.6E-05	18881	1.9E-01
rs2424333	20	20278144	t	0.41	0.04	0.01	7.2E-05	18881	1.5E-01
rs147959871	20	47061938	c	0.01	0.37	0.09	7.9E-05	8145	5.8E-01
rs142222872	20	44236390	t	0.99	0.36	0.09	7.9E-05	8700	3.7E-01
rs2422858	20	3131488	t	0.34	-0.05	0.01	8.7E-05	12731	4.9E-01
20:18903947	20	18903947	a	1.00	0.62	0.16	9.1E-05	7839	4.7E-03
rs6061802	20	60334218	t	0.71	0.05	0.01	9.4E-05	18881	4.5E-01
20:21906768	20	21906768	a	0.01	-0.38	0.10	9.4E-05	10440	2.3E-01
rs11907843	20	60334572	a	0.28	-0.05	0.01	9.8E-05	18881	5.7E-01
rs79345290	20	30679429	a	0.02	-0.16	0.04	1.0E-04	18585	6.0E-01
rs6130480	20	42554793	a	0.97	0.14	0.03	1.0E-04	18585	6.9E-01
rs189629782	21	27061330	t	0.98	-0.17	0.04	3.0E-05	18881	8.1E-01
21:41683045	21	41683045	c	0.00	-0.53	0.13	4.6E-05	8145	9.4E-01
rs113506821	21	42848747	t	0.06	0.09	0.02	4.9E-05	18881	7.4E-01
rs2838048	21	42908010	a	0.52	0.04	0.01	6.0E-05	18881	1.0E-01
21:42839661	21	42839661	t	0.01	-0.32	0.08	6.4E-05	11137	6.8E-01
rs139406961	21	35447840	c	0.03	-0.16	0.04	6.6E-05	17738	5.2E-01
rs2026270	21	41342758	t	0.16	-0.06	0.02	8.0E-05	18881	2.6E-01
rs117724801	21	41345773	a	0.99	0.29	0.08	8.5E-05	9537	9.1E-01
rs142965874	21	18850134	a	0.01	0.18	0.05	1.1E-04	18584	5.2E-01
22:19926530	22	19926530	t	1.00	-0.55	0.12	9.8E-06	11537	9.4E-01
22:19926530	22	19926530	t	1.00	-0.55	0.12	9.8E-06	11537	9.4E-01
rs79847867	22	16495833	a	0.09	-0.17	0.04	1.2E-05	6379	3.5E-01
22:36879126	22	36879126	a	0.00	-0.65	0.15	1.8E-05	6150	3.7E-01
rs45532834	22	28157748	t	0.02	0.17	0.04	2.2E-05	16280	4.9E-01
rs16993225	22	23154058	t	0.16	0.10	0.02	3.7E-05	7839	7.2E-01
rs1029696	22	17703572	t	0.56	0.06	0.02	4.0E-05	8285	8.3E-01
22:40092487	22	40092487	t	0.00	0.58	0.14	4.4E-05	8145	3.0E-01
22:40318938	22	40318938	t	0.01	0.51	0.13	6.6E-05	8166	4.9E-01
rs66473469	22	36662654	a	0.94	0.11	0.03	7.0E-05	17826	7.4E-01
rs8140034	22	33604383	a	0.80	-0.06	0.02	8.3E-05	12731	3.1E-01
rs140205061	22	34187289	c	0.02	0.19	0.05	1.4E-04	14081	2.3E-01
