# Supplementary material for: Low-frequency variation in TP53 has large effects on head circumference and intracranial volume
Source: Nat Commun. 2019 Jan 21;10:357. doi: 10.1038/s41467-018-07863-x (PMC6341110; doi:10.1038/s41467-018-07863-x)
Supplement: Supplementary file 9 — Supplementary Data 6 [file 41467_2018_7863_MOESM9_ESM.xlsx]

## Sheet: Sheet1
HC (Adult) meta-analysis: Gene-based analysis (multiple testing threshold p< 1.7E-06)
Gene locus	Chr	Start (b37)	Stop (b37)	Z	p
ZNF354C	5	178437607	178557695	4.83	6.9E-07
