# Supplementary material for: Low-frequency variation in TP53 has large effects on head circumference and intracranial volume
Source: Nat Commun. 2019 Jan 21;10:357. doi: 10.1038/s41467-018-07863-x (PMC6341110; doi:10.1038/s41467-018-07863-x)
Supplement: Supplementary file 10 — Supplementary Data 7 [file 41467_2018_7863_MOESM10_ESM.xlsx]

## Sheet: Sheet1
HC (Pediatric+adult) meta-analysis: Gene-based analysis (multiple testing threshold p < 1.7E-06)
Gene locus	Chr	Start (b37)	Stop (b37)	Z	p
HBEGF	5	139662428	139776188	5.47	2.2E-08
SLC4A9	5	139689787	139804722	5.68	6.6E-09
CD14	5	139961313	140063286	4.71	1.2E-06
TMCO6	5	139969012	140074989	4.75	1.0E-06
NDUFA2	5	139974948	140077370	4.75	9.9E-07
IK	5	139977384	140092065	4.66	1.6E-06
PCDHA1	5	140115876	140441929	4.67	1.5E-06
HLA-B	6	31271649	31374989	5.21	9.6E-08
MICA	6	31317561	31433090	5.74	4.7E-09
TNF	6	31493350	31596112	4.68	1.5E-06
AIF1	6	31532994	31634798	4.71	1.2E-06
BTNL2	6	32312513	32424900	5.09	1.8E-07
HLA-DQA2	6	32659163	32764664	4.65	1.7E-06
FOXO3	6	108831026	109055971	5.41	3.1E-08
PPP6R3	11	68178186	68432802	4.70	1.3E-06
TUBA1A	12	49528582	49632861	4.71	1.2E-06
PCBP2	12	53795886	53924946	4.75	1.0E-06
PITPNM2	12	123418027	123644975	5.40	3.2E-08
MPHOSPH9	12	123590946	123756441	5.69	6.3E-09
C12orf65	12	123667844	123792506	5.50	1.9E-08
CDK2AP1	12	123695538	123806687	5.31	5.4E-08
RILPL2	12	123849936	123971264	4.92	4.4E-07
TRAF7	16	2155799	2278130	5.13	1.4E-07
CASKIN1	16	2177184	2296465	5.27	7.0E-08
MLST8	16	2205178	2309418	5.37	4.0E-08
BRICD5	16	2209254	2311069	5.36	4.1E-08
PGP	16	2211603	2314822	5.44	2.6E-08
E4F1	16	2223567	2335743	5.53	1.6E-08
DNASE1L2	16	2236468	2338712	5.48	2.2E-08
ECI1	16	2239873	2351602	5.24	8.2E-08
RNPS1	16	2253100	2368413	4.65	1.7E-06
