# Supplementary material for: Low-frequency variation in TP53 has large effects on head circumference and intracranial volume
Source: Nat Commun. 2019 Jan 21;10:357. doi: 10.1038/s41467-018-07863-x (PMC6341110; doi:10.1038/s41467-018-07863-x)
Supplement: Supplementary file 11 — Supplementary Data 8 [file 41467_2018_7863_MOESM11_ESM.xlsx]

## Sheet: Cerebellum
S-prediXcan for HC (Pediatric+adult) for cerebellum
gene	gene_name	zscore	effect_size	pvalue	var_g	pred_perf_r2	pred_perf_pval	pred_perf_qval	n_snps_used	n_snps_in_cov	n_snps_in_model
ENSG00000206344.6	HCG27	-4.868992101	-0.160163649	1.12E-06	0.056727349	0.153951785	4.15E-05	9.33E-05	44	61	61
ENSG00000139531.8	SUOX	-4.65194338	-0.076106482	3.29E-06	0.179576522	0.245091408	1.06E-07	4.59E-07	19	22	22
ENSG00000255408.2	PCDHA3	4.255074639	0.075587491	2.09E-05	0.186772234	0.280929445	8.53E-09	4.62E-08	38	43	43
ENSG00000120327.4	PCDHB14	-4.101335694	-0.1766829	4.11E-05	0.031325407	0.051688113	0.020914501	0.01931978	29	32	32
ENSG00000196735.7	HLA-DQA1	3.962283947	0.366443659	7.42E-05	0.00673706	0.233869536	2.28E-07	9.31E-07	6	35	35
ENSG00000198502.5	HLA-DRB5	3.768990022	0.214548509	0.000163909	0.022060955	0.300600792	2.04E-09	1.22E-08	17	45	45
ENSG00000182150.11	ERCC6L2	3.714197648	0.073549602	0.000203849	0.121797603	0.089674136	0.002119882	0.002833952	52	56	56
ENSG00000104738.12	MCM4	3.54729957	0.119980601	0.000389202	0.046240063	0.035319571	0.057298011	0.043326147	9	10	10
ENSG00000164045.7	CDC25A	3.514739677	0.183569877	0.000440185	0.01771754	0.107423825	0.000725857	0.001135087	9	10	10
ENSG00000140526.12	ABHD2	3.482173037	0.212933333	0.000497362	0.012502558	0.072315497	0.006020295	0.006847438	2	2	2
ENSG00000204970.5	PCDHA1	3.465865913	0.146895204	0.000528527	0.033686394	0.160021894	2.83E-05	6.70E-05	22	28	28
ENSG00000196126.6	HLA-DRB1	3.447587797	0.154357214	0.000565617	0.033378131	0.472965688	1.02E-15	2.43E-14	44	103	103
ENSG00000167535.3	CACNB3	-3.42193025	-0.081002673	0.000621783	0.089070098	0.127983204	0.000207261	0.000386678	15	17	17
ENSG00000139636.11	LMBR1L	-3.397099032	-0.110668917	0.000681043	0.058979947	0.12554547	0.000240671	0.00043725	5	6	6
ENSG00000185829.11	ARL17A	-3.335936765	-0.049454643	0.000850125	0.2784329	0.535936489	1.56E-18	6.98E-17	31	45	45
ENSG00000079691.15	LRRC16A	-3.334819324	-0.144949838	0.000853548	0.027159692	0.049994872	0.023184782	0.020894602	7	8	8
ENSG00000121310.12	ECHDC2	3.332615277	0.999921264	0.000860338	0.000624024	0.042300145	0.037143337	0.030676343	2	2	2
ENSG00000167553.10	TUBA1C	3.332553301	0.069843116	0.00086053	0.151523764	0.189676221	4.27E-06	1.24E-05	26	32	32
ENSG00000203722.3	RAET1G	3.305769772	0.063545217	0.000947159	0.161142267	0.47431245	8.97E-16	2.17E-14	32	34	34
ENSG00000152284.4	TCF7L1	-3.218084503	-0.095387038	0.001290498	0.062362992	0.174671302	1.12E-05	2.94E-05	23	25	25
ENSG00000234745.5	HLA-B	3.215886258	0.053523102	0.001300424	0.20890253	0.388215875	2.09E-12	2.44E-11	70	92	92
ENSG00000204969.5	PCDHA2	3.186465684	0.064559118	0.001440226	0.14351175	0.13633729	0.000123947	0.000247705	33	39	39
ENSG00000170445.8	HARS	3.181732403	0.114563414	0.00146397	0.053231092	0.07780019	0.004329434	0.005152916	10	10	10
ENSG00000182389.14	CACNB4	3.172192132	0.123040376	0.001512929	0.038030201	0.069906793	0.006958726	0.007728426	23	26	26
ENSG00000227124.4	ZNF717	-3.099674309	-0.356197605	0.001937335	0.003366124	0.04764977	0.026750946	0.023521221	4	11	11
ENSG00000239389.3	PCDHA13	3.083975286	0.056303729	0.002042546	0.185663673	0.352572116	3.83E-11	3.41E-10	31	32	32
ENSG00000066248.10	NGEF	3.072463274	1.954707497	0.002123	0.000123643	0.124423589	0.000257786	0.00046429	1	1	1
ENSG00000204525.10	HLA-C	3.063627439	0.066696507	0.00218671	0.142841129	0.663228032	1.31E-25	4.62E-23	33	62	62
ENSG00000181222.10	POLR2A	-3.058834314	-0.901379218	0.002222	0.000534864	0.042837632	0.035933678	0.029935907	1	1	1
ENSG00000249158.2	PCDHA11	3.058127036	0.066865791	0.002227251	0.127354692	0.10513372	0.000833868	0.001276346	47	54	54
ENSG00000182087.8	TMEM259	3.048216886	0.081122542	0.002302037	0.092783961	0.075967604	0.004833575	0.005674662	24	29	29
ENSG00000136159.3	NUDT15	-3.007793838	-0.063161683	0.002631516	0.20175379	0.19734821	2.59E-06	8.09E-06	55	65	65
ENSG00000167118.6	URM1	-3.001909227	-0.097606609	0.002682922	0.060654817	0.083550841	0.003064071	0.003862619	13	16	16
ENSG00000186868.11	MAPT	2.937275923	0.141469198	0.003311094	0.038786255	0.379793814	4.22E-12	4.60E-11	7	19	19
ENSG00000178252.13	WDR6	-2.914761188	-0.055122237	0.003559608	0.147740943	0.267855372	2.17E-08	1.07E-07	46	49	49
ENSG00000164112.8	TMEM155	2.907503282	0.083473926	0.003643265	0.104817798	0.135869972	0.000127574	0.000254092	19	23	23
ENSG00000110075.10	PPP6R3	2.878151611	0.069429578	0.004000128	0.094748074	0.177918564	9.10E-06	2.44E-05	54	59	59
ENSG00000129028.4	THAP10	2.85612533	0.044145987	0.004288458	0.221221662	0.061596728	0.011479189	0.01179356	56	60	60
ENSG00000250120.2	PCDHA10	-2.85543486	-0.064426296	0.004297794	0.119189979	0.358505787	2.38E-11	2.26E-10	24	27	27
ENSG00000257704.2	PRR24	2.852186785	0.107859189	0.004341958	0.037214754	0.066761166	0.008408934	0.009049238	14	17	17
ENSG00000164048.9	ZNF589	2.847164767	0.0574305	0.004411053	0.105002584	0.344972336	6.97E-11	5.90E-10	13	20	20
ENSG00000136146.10	MED4	2.822303891	0.081656716	0.004767997	0.101102922	0.129984802	0.000183291	0.000347938	29	36	36
ENSG00000172935.8	MRGPRF	-2.8183768	-0.077875469	0.004826713	0.07071733	0.070157454	0.00685459	0.007639155	15	17	17
ENSG00000075826.12	SEC31B	-2.797358166	-0.059091297	0.005152238	0.116389231	0.164402596	2.15E-05	5.22E-05	43	55	55
ENSG00000141569.6	TRIM65	-2.795562755	-0.047699328	0.005180944	0.211689019	0.263248004	3.00E-08	1.44E-07	34	45	45
ENSG00000120324.4	PCDHB10	-2.786803528	-0.066736641	0.005323074	0.090118387	0.222020148	5.08E-07	1.91E-06	17	19	19
ENSG00000175193.8	PARL	2.785529331	0.043357092	0.00534404	0.245185137	0.215752672	7.72E-07	2.75E-06	53	61	61
ENSG00000149679.7	CABLES2	2.773643635	0.054734225	0.005543236	0.130646295	0.266196431	2.44E-08	1.20E-07	31	34	34
ENSG00000158023.5	WDR66	2.770497745	0.047221293	0.005597069	0.177885695	0.3242094	3.47E-10	2.50E-09	24	26	26
ENSG00000238083.3	LRRC37A2	-2.764268033	-0.037729769	0.005705065	0.355712555	0.670092507	4.60E-26	1.81E-23	27	39	39
ENSG00000175463.7	TBC1D10C	2.748221867	0.093278833	0.005991945	0.04281202	0.056141437	0.015962543	0.0155537	16	22	22
ENSG00000168646.8	AXIN2	-2.743340723	-0.044480568	0.006081754	0.271887374	0.102570982	0.000973733	0.00145436	86	104	104
ENSG00000138834.8	MAPK8IP3	-2.731190232	-0.132565001	0.006310603	0.019316894	0.056308611	0.015801778	0.015415191	12	14	14
ENSG00000205937.7	RNPS1	-2.731148094	-0.054596896	0.00631141	0.127390076	0.223905292	4.48E-07	1.70E-06	17	18	18
ENSG00000204248.6	COL11A2	-2.718704273	-0.053885377	0.006553817	0.145293759	0.32023733	4.69E-10	3.26E-09	46	65	65
ENSG00000178802.13	MPI	2.717294757	0.049733014	0.006581796	0.161173264	0.138011098	0.000111773	0.000226575	51	70	70
ENSG00000268852.1	AC132872.2	2.716932774	0.839466425	0.006588999	0.000556158	0.078770552	0.004084145	0.00491388	1	1	1
ENSG00000137411.12	VARS2	-2.711403929	-0.041322176	0.006699895	0.215489552	0.229030863	3.17E-07	1.25E-06	67	92	92
ENSG00000131495.4	NDUFA2	2.701042341	0.073418009	0.006912254	0.079900077	0.045106337	0.031257707	0.026662067	26	27	27
ENSG00000129347.15	KRI1	-2.677037144	-0.076442199	0.00742764	0.072000396	0.156762887	3.48E-05	7.99E-05	11	15	15
ENSG00000143398.15	PIP5K1A	-2.672215805	-0.103830752	0.007535217	0.075481067	0.087724302	0.002383841	0.003116164	9	15	15
ENSG00000131023.8	LATS1	2.670279943	0.062624068	0.007578803	0.109705602	0.159105684	3.00E-05	7.04E-05	22	22	22
ENSG00000073605.14	GSDMB	-2.668389566	-0.192807254	0.007621583	0.017009942	0.092679357	0.001768928	0.002412187	6	8	8
ENSG00000132740.4	IGHMBP2	2.666692247	0.061259114	0.007660178	0.112477255	0.209070857	1.20E-06	4.11E-06	14	16	16
ENSG00000213672.3	NCKIPSD	2.666567236	0.071714798	0.007663028	0.071859203	0.070286462	0.006801605	0.00758967	11	15	15
ENSG00000214087.4	ARL16	-2.646754937	-0.050223486	0.008126822	0.144008918	0.282625511	7.55E-09	4.14E-08	17	17	17
ENSG00000153347.5	FAM81B	2.640447354	0.104723328	0.008279666	0.045976461	0.1054808	0.000816528	0.001255039	18	22	22
ENSG00000248099.3	INSL3	-2.633135071	-0.091795207	0.00846007	0.047484898	0.062084978	0.011145989	0.011481247	11	13	13
ENSG00000169592.10	INO80E	-2.626650521	-0.04653901	0.008622985	0.17834055	0.168297046	1.68E-05	4.21E-05	36	47	47
ENSG00000114423.14	CBLB	-2.625000635	-0.065030277	0.008664881	0.107974265	0.173733458	1.19E-05	3.09E-05	31	34	34
ENSG00000067221.9	STOML1	-2.619339672	-0.052474251	0.008810017	0.134350234	0.097759618	0.001302178	0.001864097	32	39	39
ENSG00000172818.5	OVOL1	-2.618671065	-0.038562737	0.008827302	0.221316266	0.187051449	5.06E-06	1.45E-05	47	53	53
ENSG00000143387.8	CTSK	-2.614300138	-0.041232727	0.008941045	0.224144412	0.294972308	3.08E-09	1.79E-08	24	27	27
ENSG00000157036.8	EXOG	-2.598531593	-0.083751344	0.009362343	0.066552439	0.189209251	4.40E-06	1.28E-05	6	7	7
ENSG00000105607.8	GCDH	2.587817402	0.032024826	0.009658617	0.427079492	0.594635822	1.60E-21	1.96E-19	33	35	35
ENSG00000137312.10	FLOT1	2.585261787	0.122803782	0.009730509	0.027891327	0.120747863	0.000322745	0.000564891	33	41	41
ENSG00000140451.8	PIF1	2.584628827	0.090165745	0.009748388	0.042605542	0.135938057	0.000127039	0.000253169	21	22	22
ENSG00000166435.11	XRRA1	2.583080781	0.024038826	0.009792239	0.623860972	0.599512644	8.66E-22	1.18E-19	72	85	85
ENSG00000181315.6	ZNF322	-2.578672001	-0.080062476	0.009918091	0.057786244	0.143016714	8.20E-05	0.000171036	5	7	7
ENSG00000198218.6	QRICH1	-2.571526281	-0.063751307	0.010125133	0.079475631	0.144525915	7.46E-05	0.000157645	3	5	5
ENSG00000204290.6	BTNL2	2.567790775	0.155940468	0.010234891	0.025236067	0.059471793	0.013050483	0.013181997	28	35	35
ENSG00000161634.7	DCD	-2.558912992	-0.621261786	0.010500002	0.001165586	0.079805342	0.003837857	0.004661955	1	1	1
ENSG00000177302.10	TOP3A	-2.539993482	-0.07521638	0.011085453	0.065497836	0.190698941	4.00E-06	1.17E-05	10	17	17
ENSG00000085514.11	PILRA	-2.524724911	-0.04992836	0.011578889	0.134270765	0.538705607	1.15E-18	5.28E-17	38	56	56
ENSG00000120093.7	HOXB3	-2.523761835	-0.043821085	0.011610656	0.183391153	0.036701584	0.052555275	0.04051946	41	45	45
ENSG00000142765.13	SYTL1	-2.521095051	-0.051630832	0.011699025	0.131408792	0.103599321	0.000915013	0.001382009	20	25	25
ENSG00000136802.7	LRRC8A	2.520344885	0.05579925	0.01172399	0.147024545	0.089392013	0.002156192	0.002864092	42	52	52
ENSG00000104067.12	TJP1	-2.513550194	-0.097872748	0.011952277	0.048813275	0.111772795	0.000557505	0.000907704	14	18	18
ENSG00000142632.12	ARHGEF19	-2.510136408	-0.04955986	0.012068453	0.158200744	0.289100087	4.73E-09	2.68E-08	10	13	13
ENSG00000177352.9	CCDC71	-2.509070544	-0.046932968	0.012104931	0.147657251	0.162534471	2.42E-05	5.79E-05	17	20	20
ENSG00000172938.3	MRGPRD	-2.505679069	-0.04494512	0.012221649	0.164209765	0.382112948	3.48E-12	3.89E-11	8	9	9
ENSG00000161692.13	DBF4B	2.496645565	0.037911628	0.01253742	0.247264768	0.348016483	5.49E-11	4.76E-10	36	45	45
ENSG00000102606.13	ARHGEF7	-2.489681354	-0.072886049	0.012785767	0.067863455	0.310641788	9.66E-10	6.24E-09	9	12	12
ENSG00000186235.6	AC016757.3	2.486178227	0.048997813	0.012912328	0.148738436	0.04054299	0.041399336	0.033426497	37	39	39
ENSG00000133627.13	ACTR3B	2.483820564	0.086249597	0.012998129	0.040945385	0.05148709	0.021171738	0.019482463	14	21	21
ENSG00000173917.9	HOXB2	-2.480695634	-0.052650354	0.013112629	0.13276892	0.078516864	0.004146898	0.0049691	51	58	58
ENSG00000181284.2	TMEM102	-2.46538547	-0.143648737	0.013686592	0.021183206	0.054252148	0.017898899	0.017097307	4	4	4
ENSG00000162928.8	PEX13	2.463376263	0.02981482	0.013763539	0.357455146	0.141752781	8.87E-05	0.000183414	82	93	93
ENSG00000173137.7	ADCK5	2.463078721	0.194829151	0.013774967	0.010903356	0.069463803	0.007146663	0.007902414	7	7	7
ENSG00000254415.3	SIGLEC14	-2.451117157	-0.076853723	0.014241359	0.05002666	0.140641662	9.50E-05	0.000195343	9	10	10
ENSG00000170703.11	TTLL6	-2.445269942	-0.084227128	0.014474376	0.048221686	0.100142253	0.001127693	0.001651886	13	15	15
ENSG00000267508.1	ZNF285	2.444136541	0.07725427	0.01451993	0.07640143	0.086059709	0.002634938	0.003394225	24	30	30
ENSG00000112619.6	PRPH2	2.441572595	0.031919589	0.014623448	0.320124537	0.486971091	2.59E-16	6.99E-15	22	22	22
ENSG00000071894.10	CPSF1	2.434971594	0.029606212	0.014892959	0.460841659	0.708554684	8.55E-29	7.56E-26	20	25	25
ENSG00000092036.12	HAUS4	-2.43468349	-0.03938195	0.014904821	0.194798844	0.370577405	8.99E-12	9.17E-11	22	28	28
ENSG00000166321.9	NUDT13	2.431670219	0.166940615	0.015029384	0.022023244	0.033846098	0.062850463	0.046696146	12	15	15
ENSG00000169783.8	LINGO1	2.431621052	0.095056898	0.015031425	0.040351129	0.05642049	0.015695106	0.015336506	20	31	31
ENSG00000149548.10	CCDC15	-2.425895432	-0.04786811	0.01527067	0.116188533	0.09631988	0.001420356	0.002001678	35	35	35
ENSG00000170542.5	SERPINB9	2.417928625	0.043730088	0.015609138	0.252841585	0.185242667	5.69E-06	1.61E-05	46	50	50
ENSG00000179774.7	ATOH7	2.411963854	0.091667981	0.015866854	0.046280552	0.118312614	0.000374453	0.000642985	11	12	12
ENSG00000179344.12	HLA-DQB1	2.411399398	0.231767254	0.015891435	0.008691755	0.474142579	9.12E-16	2.18E-14	12	60	60
ENSG00000124532.10	MRS2	-2.410094254	-0.047117326	0.0159484	0.134845863	0.296521046	2.75E-09	1.62E-08	60	63	63
ENSG00000112139.10	MDGA1	2.405720234	0.059402128	0.01614062	0.078427708	0.097210445	0.001346056	0.001916054	19	20	20
ENSG00000136436.10	CALCOCO2	-2.40455897	-0.062353681	0.016191994	0.078440157	0.118617843	0.000367547	0.000632663	17	18	18
ENSG00000198373.8	WWP2	2.396152362	0.545272781	0.016568202	0.001052452	0.033235841	0.065312721	0.048121241	7	12	12
ENSG00000088053.7	GP6	-2.384681216	-0.058014559	0.017093927	0.095448197	0.11661405	0.000415293	0.000704562	27	30	30
ENSG00000167193.7	CRK	2.383335046	0.107247065	0.017156572	0.029991736	0.09028785	0.002042985	0.002741514	6	9	9
ENSG00000121716.14	PILRB	-2.382485093	-0.052728331	0.017196228	0.116489984	0.489519618	2.01E-16	5.63E-15	28	36	36
ENSG00000042286.10	AIFM2	2.377341872	0.026939945	0.017437918	0.415419267	0.465407553	2.11E-15	4.62E-14	57	67	67
ENSG00000160072.15	ATAD3B	-2.36855168	-0.1370706	0.017857885	0.052506974	0.078624017	0.004120276	0.004947255	19	43	43
ENSG00000135698.5	MPHOSPH6	2.357702536	0.020762092	0.018388421	0.725140802	0.335286554	1.48E-10	1.16E-09	127	143	143
ENSG00000101639.14	CEP192	2.328506859	0.034293746	0.019885205	0.287673377	0.494713759	1.19E-16	3.51E-15	37	42	42
ENSG00000162461.7	SLC25A34	-2.32819796	-0.024201899	0.019901594	0.468885194	0.492676241	1.46E-16	4.24E-15	65	79	79
ENSG00000185294.5	SPPL2C	-2.32657083	-0.076929522	0.019988119	0.062868852	0.158110181	3.20E-05	7.43E-05	14	18	18
ENSG00000146021.10	KLHL3	-2.323912132	-0.090006443	0.020130204	0.040442102	0.046766438	0.028235421	0.024582055	42	44	44
ENSG00000225190.4	PLEKHM1	2.311082613	0.042689189	0.020828292	0.190066728	0.598543414	9.80E-22	1.28E-19	33	57	57
ENSG00000188474.6	ZNF788	2.310676672	0.065062093	0.020850721	0.075616389	0.117219082	0.000400263	0.000682336	9	10	10
ENSG00000100461.13	RBM23	2.303974842	0.070645165	0.021224056	0.067895637	0.184826132	5.84E-06	1.65E-05	7	8	8
ENSG00000146648.11	EGFR	-2.302600447	-0.117022002	0.021301334	0.017721657	0.045378086	0.030741158	0.026310286	4	4	4
ENSG00000213996.8	TM6SF2	-2.299171019	-0.072809202	0.02149523	0.055070515	0.09405216	0.001628478	0.002251916	16	19	19
ENSG00000135390.13	ATP5G2	2.29814977	0.035331921	0.021553266	0.256251034	0.497748801	8.76E-17	2.65E-15	13	14	14
ENSG00000122548.3	KIAA0087	-2.294207245	-0.032278352	0.021778597	0.292061872	0.45255629	7.11E-15	1.35E-13	31	32	32
ENSG00000135406.9	PRPH	-2.291631635	-0.028211065	0.021926908	0.335656067	0.240865034	1.42E-07	5.98E-07	55	70	70
ENSG00000177614.5	PGBD5	2.29110932	0.092656195	0.021957092	0.039048249	0.168939181	1.61E-05	4.07E-05	5	9	9
ENSG00000104805.11	NUCB1	2.290052312	0.026841895	0.022018284	0.431858018	0.195280136	2.97E-06	9.11E-06	85	115	115
ENSG00000214063.6	TSPAN4	-2.290011003	-0.091279716	0.022020679	0.033794616	0.065115653	0.009284923	0.00982749	13	19	19
ENSG00000134697.8	GNL2	-2.286131572	-0.125770452	0.022246562	0.018931091	0.036133159	0.054454364	0.041629763	12	12	12
ENSG00000156253.2	RWDD2B	-2.282763925	-0.027977306	0.022444278	0.373781649	0.511330903	2.17E-17	7.37E-16	57	60	60
ENSG00000158483.11	FAM86C1	2.280592418	0.126346521	0.022572576	0.018493525	0.251842914	6.65E-08	2.99E-07	10	17	17
ENSG00000140497.12	SCAMP2	2.280375684	0.062500586	0.022585416	0.106852344	0.136039005	0.00012625	0.000251881	39	55	55
ENSG00000100416.8	TRMU	-2.27225394	-0.039045476	0.023071177	0.295629043	0.164150707	2.18E-05	5.29E-05	76	91	91
ENSG00000166483.6	WEE1	2.267798985	0.076170792	0.023341461	0.063411576	0.036842212	0.052096181	0.040262035	24	26	26
ENSG00000160949.12	TONSL	2.258847989	0.043656907	0.023892842	0.146135881	0.148040622	6.00E-05	0.000130022	26	32	32
ENSG00000100991.7	TRPC4AP	-2.258438501	-0.085898577	0.023918335	0.033650317	0.047731221	0.026618148	0.023410275	11	11	11
ENSG00000272781.1	MDGA2	-2.257609844	-0.724064834	0.023969994	0.000548675	0.136465647	0.000122969	0.000246307	1	1	1
ENSG00000103522.11	IL21R	-2.253139853	-0.033344732	0.024250332	0.268638043	0.228595045	3.26E-07	1.29E-06	42	46	46
ENSG00000087157.14	PGS1	-2.240375	-0.067422418	0.025066588	0.054676205	0.079841936	0.003829424	0.00465331	38	41	41
ENSG00000106686.12	SPATA6L	2.237414275	0.064738311	0.025259276	0.064440563	0.126615908	0.000225391	0.000413953	22	26	26
ENSG00000240053.8	LY6G5B	2.23225802	0.048801608	0.025597915	0.125903755	0.171456759	1.37E-05	3.54E-05	35	62	62
ENSG00000149451.13	ADAM33	2.230193062	0.059030516	0.025734629	0.080135961	0.054154117	0.018005644	0.017172066	41	46	46
ENSG00000117877.6	CD3EAP	2.229592253	0.047178144	0.025774525	0.123365914	0.242547531	1.26E-07	5.38E-07	20	22	22
ENSG00000196655.5	TRAPPC4	-2.22767468	-0.072190223	0.025902217	0.051291561	0.127378582	0.000215093	0.000399394	17	18	18
ENSG00000106351.8	AGFG2	-2.226412702	-0.068594791	0.02598655	0.056042531	0.113565699	0.000499949	0.00082832	8	9	9
ENSG00000120278.10	PLEKHG1	2.225910938	0.064123681	0.026020148	0.077633808	0.0448004	0.03184991	0.02710882	31	34	34
ENSG00000185019.12	UBOX5	2.225236716	0.039201934	0.026065351	0.154866517	0.041475845	0.039080627	0.031962898	51	55	55
ENSG00000133065.6	SLC41A1	-2.220050637	-0.084672283	0.026415331	0.040949086	0.04196024	0.037929904	0.031209373	21	21	21
ENSG00000171824.9	EXOSC10	2.219201158	0.094580128	0.026473042	0.0347427	0.152327579	4.59E-05	0.000102129	9	14	14
ENSG00000143374.10	TARS2	2.219082172	0.075839741	0.026481135	0.054549151	0.073162992	0.005721214	0.006559999	11	18	18
ENSG00000176681.10	LRRC37A	-2.21700292	-0.040115527	0.026622892	0.203783207	0.616436215	9.66E-23	1.63E-20	27	46	46
ENSG00000163879.9	DNALI1	-2.215316988	-0.034002646	0.026738315	0.264192164	0.341113916	9.43E-11	7.85E-10	47	52	52
ENSG00000121314.2	TAS2R8	-2.210696205	-0.049723297	0.027056882	0.104760167	0.15452575	4.00E-05	9.03E-05	29	33	33
ENSG00000204356.7	NELFE	2.210315565	0.096738923	0.027083269	0.044171393	0.059142076	0.013313066	0.013382263	23	42	42
ENSG00000186862.13	PDZD7	-2.208795551	-0.026888209	0.027188865	0.363809933	0.34802526	5.48E-11	4.76E-10	45	49	49
ENSG00000068097.10	HEATR6	-2.205939432	-0.035273721	0.027388241	0.200221847	0.124954414	0.000249543	0.000450953	45	57	57
ENSG00000197566.5	ZNF624	2.199311051	0.109995822	0.027855812	0.026516176	0.05761472	0.014600882	0.014467105	44	50	50
ENSG00000108786.6	HSD17B1	2.195235374	0.046337819	0.028146718	0.139979908	0.164469646	2.14E-05	5.20E-05	16	23	23
ENSG00000164600.4	NEUROD6	2.190000575	0.084546679	0.028524195	0.038034783	0.035266921	0.057487295	0.043441416	30	31	31
ENSG00000144648.10	ACKR2	2.188136937	0.031533931	0.028659629	0.281998497	0.074625075	0.005239811	0.006078955	85	105	105
ENSG00000079313.7	REXO1	2.187034607	1.366966942	0.028739998	0.000132255	0.134543306	0.000138452	0.000273039	1	1	1
ENSG00000167272.6	POP5	2.184498716	0.080254557	0.028925622	0.040959303	0.063275891	0.010373581	0.010817916	11	12	12
ENSG00000155465.14	SLC7A7	-2.183438361	-0.079104864	0.029003544	0.036002009	0.067981425	0.007813417	0.008493646	16	16	16
ENSG00000168906.8	MAT2A	2.182867439	0.051218555	0.029045574	0.111156197	0.192274599	3.61E-06	1.07E-05	14	15	15
ENSG00000140009.14	ESR2	-2.180945199	-0.078645929	0.02918747	0.05785994	0.040278544	0.04208217	0.033869594	40	42	42
ENSG00000109705.7	NKX3-2	2.170611967	0.161182323	0.029960517	0.015724418	0.046435579	0.028812914	0.024986431	12	14	14
ENSG00000171466.5	ZNF562	2.165765314	0.029337834	0.030329125	0.315799226	0.055392773	0.016703085	0.016125454	71	87	87
ENSG00000156256.10	USP16	2.165223729	0.027922562	0.030370556	0.356169389	0.232411307	2.52E-07	1.01E-06	75	84	84
ENSG00000253731.1	PCDHGA6	2.160441394	0.094137582	0.030738516	0.027419173	0.062356002	0.01096526	0.011328069	4	5	5
ENSG00000197345.8	MRPL21	-2.153107919	-0.024847654	0.031310198	0.424325206	0.616689581	9.34E-23	1.63E-20	46	49	49
ENSG00000204965.4	PCDHA5	2.150373118	0.102019893	0.031525713	0.029141101	0.072461492	0.005967678	0.006807292	8	9	9
ENSG00000258365.1	RP11-1105G2.3	-2.145204333	-0.058593312	0.031936513	0.077214818	0.042055626	0.037707455	0.031062466	36	41	41
ENSG00000096093.10	EFHC1	-2.143127763	-0.040452627	0.032102841	0.172681903	0.066296167	0.008647692	0.009269515	51	65	65
ENSG00000136950.9	ARPC5L	2.14259634	0.047688863	0.032145525	0.249136972	0.391233574	1.63E-12	1.96E-11	13	14	14
ENSG00000165097.9	KDM1B	-2.142030751	-0.071361759	0.032191008	0.049355368	0.115435387	0.000446195	0.00075194	8	8	8
ENSG00000197147.8	LRRC8B	2.139911797	0.030521341	0.032361896	0.288119258	0.292432449	3.71E-09	2.12E-08	61	63	63
ENSG00000132423.6	COQ3	-2.139286942	-0.066123937	0.032412437	0.06325131	0.05725028	0.014926358	0.014707205	17	18	18
ENSG00000183346.6	C10orf107	-2.138655788	-0.123448565	0.032463556	0.025497773	0.073969721	0.00545036	0.006292267	11	11	11
ENSG00000197969.7	VPS13A	-2.134627352	-0.028344215	0.032791461	0.377688461	0.233811082	2.29E-07	9.33E-07	115	125	125
ENSG00000181896.7	ZNF101	-2.133536194	-0.079713506	0.032880766	0.038512891	0.087313587	0.002443487	0.003178861	13	15	15
ENSG00000223572.5	CKMT1A	-2.133103873	-0.072938932	0.032916206	0.136857952	0.041327784	0.0394395	0.032193211	45	52	52
ENSG00000177764.6	ZCCHC3	2.127856305	0.039611645	0.033348999	0.153064695	0.145472023	7.04E-05	0.000149577	43	47	47
ENSG00000043514.11	TRIT1	2.126844383	0.047871521	0.033433015	0.117201445	0.170606012	1.45E-05	3.70E-05	35	39	39
ENSG00000099785.6	Mar-02	2.124295526	0.069480424	0.03364544	0.044921736	0.141578404	8.96E-05	0.00018519	18	19	19
ENSG00000174950.6	CD164L2	-2.118923882	-0.075241896	0.0340969	0.034977881	0.132917927	0.000153034	0.000298088	12	14	14
ENSG00000185880.8	TRIM69	-2.118745835	-0.029251199	0.034111952	0.260052346	0.334857262	1.53E-10	1.19E-09	23	30	30
ENSG00000105639.14	JAK3	-2.116859946	-0.047675527	0.034271736	0.112104289	0.240237293	1.48E-07	6.21E-07	9	9	9
ENSG00000178460.13	MCMDC2	-2.115908152	-0.084938231	0.03435262	0.038939779	0.052347628	0.020092669	0.01872329	13	16	16
ENSG00000092108.16	SCFD1	2.115028669	0.101898755	0.034427504	0.032700251	0.116792337	0.000410807	0.00069762	43	45	45
ENSG00000020922.8	MRE11A	2.114398577	0.02957394	0.034481239	0.267728973	0.471892884	1.13E-15	2.63E-14	13	13	13
ENSG00000188542.5	DUSP28	-2.112661616	-0.101187779	0.034629741	0.025244357	0.03460205	0.059934694	0.044954714	7	8	8
ENSG00000085999.7	RAD54L	2.112213229	0.03998896	0.034668164	0.138655835	0.191209364	3.87E-06	1.14E-05	32	37	37
ENSG00000131584.14	ACAP3	-2.110518151	-0.091472131	0.034813749	0.049434324	0.047097816	0.027668893	0.024178421	9	38	38
ENSG00000116016.9	EPAS1	2.109980822	0.161499565	0.034860008	0.008446167	0.070088618	0.006883031	0.007658786	1	1	1
ENSG00000144959.5	NCEH1	2.105085593	0.021493952	0.035283858	0.606425098	0.275964435	1.22E-08	6.36E-08	111	125	125
ENSG00000223501.4	VPS52	2.104951891	0.08307909	0.035295496	0.037456306	0.04063019	0.041176693	0.033284719	16	22	22
ENSG00000090238.7	YPEL3	2.10439554	0.041154837	0.035343958	0.128630356	0.16518957	2.05E-05	5.03E-05	25	29	29
ENSG00000143162.7	CREG1	-2.102366882	-0.043488028	0.03552115	0.148468639	0.070310005	0.00679198	0.007581322	58	63	63
ENSG00000164122.4	ASB5	-2.101670434	-0.027391343	0.035582155	0.336409886	0.345263551	6.81E-11	5.78E-10	57	65	65
ENSG00000164323.8	KIAA1430	2.097806747	0.040268381	0.03592222	0.130682128	0.320163481	4.72E-10	3.27E-09	33	42	42
ENSG00000121898.8	CPXM2	-2.097519253	-0.051803743	0.035947635	0.095603071	0.040940308	0.040394862	0.032810187	39	41	41
ENSG00000162927.9	PUS10	-2.087878712	-0.034566382	0.036808777	0.186578128	0.069897168	0.006962756	0.007730475	57	59	59
ENSG00000170448.7	NFXL1	-2.086718739	-0.08514097	0.036913566	0.048816257	0.133852094	0.000144477	0.000283449	5	6	6
ENSG00000069482.6	GAL	-2.086623125	-0.040392554	0.036922215	0.131145039	0.208429091	1.25E-06	4.26E-06	17	18	18
ENSG00000118514.9	ALDH8A1	-2.08385825	-0.023452626	0.037173063	0.458402028	0.584046367	5.95E-21	6.19E-19	63	63	63
ENSG00000184647.6	PRSS55	2.080773711	0.036390328	0.037454624	0.224568625	0.35488585	3.18E-11	2.92E-10	21	21	21
ENSG00000160271.10	RALGDS	-2.079337701	-0.041019211	0.037586322	0.146263878	0.209230325	1.19E-06	4.08E-06	38	48	48
ENSG00000011590.9	ZBTB32	-2.078782094	-0.052023691	0.037637383	0.0855102	0.089150863	0.002187719	0.002899437	44	57	57
ENSG00000183955.8	SETD8	-2.078379542	-0.051069039	0.037674415	0.117077814	0.192608892	3.53E-06	1.05E-05	36	47	47
ENSG00000185567.6	AHNAK2	2.077797375	0.099202943	0.037728026	0.027600226	0.098636427	0.00123505	0.001783156	8	10	10
ENSG00000065618.12	COL17A1	2.075264847	0.113685328	0.037961996	0.018981348	0.040099346	0.042551494	0.034177339	3	3	3
ENSG00000227868.2	C1orf234	-2.074838017	-0.040010536	0.03800155	0.156591348	0.086524873	0.002562228	0.00331505	41	47	47
ENSG00000108828.11	VAT1	2.074604688	0.082101061	0.038023187	0.035682219	0.095425155	0.001499108	0.00209626	11	14	14
ENSG00000234127.4	TRIM26	2.071747735	0.082353061	0.038288973	0.03741991	0.086249646	0.002605004	0.003361113	22	26	26
ENSG00000143622.6	RIT1	2.071251757	0.058739811	0.038335275	0.07349778	0.068069152	0.007772273	0.008461923	16	21	21
ENSG00000110958.11	PTGES3	2.070864601	0.103816543	0.038371451	0.017633374	0.04668456	0.028377221	0.024675142	13	15	15
ENSG00000063978.11	RNF4	-2.069665916	-0.048931318	0.038483641	0.104251839	0.073783472	0.005511728	0.006358964	32	36	36
ENSG00000042429.6	MED17	2.069064856	0.712190669	0.038540001	0.000708801	0.046112828	0.029387912	0.025366907	1	3	3
ENSG00000197768.6	C9orf173	-2.06871563	-0.083647073	0.03857278	0.070848187	0.059256453	0.013221377	0.013305156	22	28	28
ENSG00000163904.8	SENP2	-2.067139683	-0.093739859	0.038720994	0.027792271	0.053716948	0.01848959	0.017492125	8	10	10
ENSG00000171703.12	TCEA2	2.063390443	0.114387973	0.039075547	0.019557339	0.06080263	0.012042713	0.012304615	9	12	12
ENSG00000128989.6	ARPP19	-2.062717332	-0.033701443	0.039139492	0.196548278	0.25246198	6.37E-08	2.88E-07	41	48	48
ENSG00000181016.5	LSMEM1	2.060702999	0.055124639	0.039331383	0.078155929	0.190821826	3.97E-06	1.16E-05	8	8	8
ENSG00000110906.8	KCTD10	2.059908129	0.103588302	0.039407324	0.036303495	0.135643534	0.000129369	0.000257232	5	5	5
ENSG00000100258.13	LMF2	-2.058926127	-0.059743512	0.039501316	0.096909563	0.06588332	0.00886538	0.009465567	28	34	34
ENSG00000159263.11	SIM2	-2.058509558	-0.035835359	0.039541245	0.157656716	0.221373924	5.30E-07	1.99E-06	50	51	51
ENSG00000107742.8	SPOCK2	2.051456434	0.109412945	0.040222518	0.022098479	0.073992006	0.005443063	0.006287947	4	4	4
ENSG00000188342.7	GTF2F2	2.047584502	0.170366984	0.040600729	0.010761005	0.035569237	0.056409245	0.042791313	7	10	10
ENSG00000134815.14	DHX34	-2.046260377	-0.073166799	0.04073076	0.044418988	0.055756151	0.016339397	0.01584353	10	10	10
ENSG00000205352.6	PRR13	2.046187205	0.203830948	0.040737956	0.005531708	0.040644708	0.041139745	0.033270058	13	16	16
ENSG00000173210.15	ABLIM3	2.045004093	0.020343805	0.040854455	0.492365561	0.498185409	8.38E-17	2.56E-15	76	82	82
ENSG00000164543.5	STK17A	2.043797442	0.073499093	0.040973562	0.040596598	0.052129023	0.020361372	0.018913889	25	26	26
ENSG00000100580.7	TMED8	-2.040384007	-0.054975121	0.041312094	0.081864267	0.156161097	3.61E-05	8.27E-05	30	30	30
ENSG00000184988.4	TMEM106A	2.032553318	0.096631971	0.042097672	0.034264621	0.065699688	0.008963969	0.009556408	13	19	19
ENSG00000237353.2	PATE4	2.032143706	0.060622725	0.04213911	0.046380132	0.03785938	0.048897345	0.03821567	37	41	41
ENSG00000130518.12	KIAA1683	2.031367435	0.072462334	0.042217735	0.048774731	0.088756624	0.002240252	0.002954669	8	8	8
ENSG00000116221.11	MRPL37	2.028853242	0.064558583	0.04247324	0.075731375	0.174526597	1.13E-05	2.96E-05	13	13	13
ENSG00000149582.11	TMEM25	2.027245932	0.035833126	0.042637268	0.150261784	0.268220586	2.11E-08	1.05E-07	24	26	26
ENSG00000152377.8	SPOCK1	-2.025602515	-0.566785973	0.042805534	0.000664304	0.04238005	0.036960882	0.030568478	2	2	2
ENSG00000130475.10	FCHO1	-2.017728809	-0.04653548	0.043619513	0.094892091	0.19418274	3.19E-06	9.68E-06	19	25	25
ENSG00000168291.8	PDHB	2.013124225	0.081213708	0.044101562	0.035455279	0.038113967	0.048129125	0.037748715	7	7	7
ENSG00000120314.14	WDR55	-2.012776298	-0.058136653	0.044138169	0.075016851	0.077665253	0.00436469	0.005189639	20	24	24
ENSG00000161180.6	CCDC116	-2.011475637	-0.084411912	0.044275241	0.029804502	0.148018694	6.01E-05	0.00013004	8	9	9
ENSG00000135318.7	NT5E	2.010708291	0.093850162	0.044356278	0.022938679	0.055582736	0.016511948	0.01598018	9	10	10
ENSG00000136718.5	IMP4	-2.006820935	-0.211546109	0.044768733	0.005789827	0.043599605	0.03428789	0.028774907	5	7	7
ENSG00000142937.7	RPS8	2.004401728	0.056627641	0.045027044	0.07520385	0.053648659	0.01856637	0.017560066	22	25	25
ENSG00000171700.9	RGS19	-2.000118127	-0.05016862	0.04548751	0.091327693	0.186217048	5.34E-06	1.52E-05	17	25	25
ENSG00000068654.11	POLR1A	1.997874787	0.032311633	0.045730237	0.23397676	0.229931845	2.98E-07	1.18E-06	37	50	50
ENSG00000154889.12	MPPE1	1.996659879	0.02375707	0.045862143	0.430902285	0.423049805	1.04E-13	1.64E-12	59	66	66
ENSG00000133661.11	SFTPD	1.995799923	0.062687838	0.045955705	0.052701438	0.109751934	0.000630281	0.001009731	20	25	25
ENSG00000108242.8	CYP2C18	1.995000781	0.07351351	0.046042795	0.043472907	0.097152428	0.001350777	0.001920454	11	11	11
ENSG00000089159.11	PXN	1.994949537	0.052958704	0.046048384	0.100787382	0.049037343	0.024578281	0.021926992	38	47	47
ENSG00000142303.9	ADAMTS10	-1.994510088	-0.036981243	0.046096339	0.142049055	0.071906571	0.006170161	0.00699092	37	44	44
ENSG00000102882.7	MAPK3	-1.990810617	-0.054605128	0.046501712	0.064260742	0.078240784	0.004216286	0.005038591	22	31	31
ENSG00000180776.11	ZDHHC20	1.989069258	0.073647839	0.046693559	0.05583663	0.035189956	0.057765174	0.043614132	26	28	28
ENSG00000165527.5	ARF6	-1.985783298	-0.036786608	0.047057391	0.18703673	0.039190605	0.045016296	0.035743148	38	45	45
ENSG00000176040.9	TMPRSS7	-1.984647339	-0.025789767	0.047183722	0.371912152	0.464555031	2.29E-15	4.95E-14	55	70	70
ENSG00000149380.7	P4HA3	-1.984394431	-0.049444796	0.047211886	0.101705457	0.138615227	0.000107675	0.000218896	29	32	32
ENSG00000204410.10	MSH5	1.979142215	0.507595576	0.047799997	0.000789301	0.042635037	0.036384797	0.030219206	4	18	18
ENSG00000228570.3	NUTM2E	1.978169822	0.047876673	0.047909552	0.073689541	0.194512696	3.12E-06	9.51E-06	23	28	28
ENSG00000185306.8	C12orf56	-1.975573474	-0.181188722	0.048203105	0.006758306	0.035792794	0.055625646	0.042333063	4	8	8
ENSG00000213057.4	C1orf220	-1.974044428	-0.044025977	0.048376691	0.114247976	0.140254108	9.73E-05	0.000199636	12	13	13
ENSG00000100324.9	TAB1	1.973668401	0.047642663	0.04841946	0.088016261	0.113056224	0.000515677	0.000850396	28	31	31
ENSG00000196284.9	SUPT3H	-1.970759554	-0.028492556	0.048751385	0.228243893	0.265731123	2.52E-08	1.23E-07	59	60	60
ENSG00000026950.12	BTN3A1	-1.968890566	-0.069451135	0.048965659	0.046570386	0.047186943	0.027518513	0.02407047	17	21	21
ENSG00000158560.10	DYNC1I1	1.966462805	0.027010914	0.049245175	0.321908113	0.3951566	1.17E-12	1.45E-11	51	53	53
ENSG00000170498.7	KISS1	-1.964220373	-0.031313209	0.049504541	0.215056756	0.101269123	0.001053465	0.001555263	43	48	48
ENSG00000215788.5	TNFRSF25	1.960019537	0.093300448	0.049993507	0.027123967	0.049810157	0.023447181	0.021087106	10	13	13
ENSG00000118257.12	NRP2	1.959857931	0.040867595	0.050012398	0.13742176	0.072219266	0.006055231	0.006882748	45	56	56
ENSG00000115155.12	OTOF	1.957749389	0.039551328	0.050259427	0.116662234	0.052224606	0.020243437	0.018826963	34	35	35
ENSG00000148225.11	WDR31	-1.95552536	-0.046203781	0.050521093	0.11167707	0.165375693	2.02E-05	4.98E-05	22	26	26
ENSG00000108515.13	ENO3	1.955452836	0.063271425	0.050529645	0.061508063	0.165114053	2.05E-05	5.04E-05	13	15	15
ENSG00000244038.5	DDOST	-1.954687414	-0.04343081	0.050619976	0.095765808	0.032909749	0.066669791	0.048957946	36	44	44
ENSG00000129951.14	LPPR3	-1.952490449	-0.656771501	0.050880004	0.000564428	0.045691633	0.030156021	0.025903499	1	1	1
ENSG00000137802.9	MAPKBP1	1.951023304	0.041470205	0.051054274	0.114287665	0.111013346	0.000583822	0.000944715	21	25	25
ENSG00000161677.7	JOSD2	-1.947344827	-0.516718894	0.051493408	0.000740687	0.041380074	0.039312373	0.032115309	2	2	2
ENSG00000198168.4	SVIP	-1.944335805	-0.089076488	0.05185497	0.026287297	0.082897702	0.003186794	0.003990905	19	20	20
ENSG00000086598.6	TMED2	1.9419916	0.033393344	0.052138117	0.181351445	0.188193919	4.70E-06	1.35E-05	49	67	67
ENSG00000148356.9	LRSAM1	-1.94007737	-0.079450729	0.052370288	0.033673365	0.143384412	8.01E-05	0.00016802	20	25	25
ENSG00000152219.4	ARL14EP	1.93772519	0.054250199	0.052656759	0.072985342	0.325442973	3.16E-10	2.29E-09	27	37	37
ENSG00000184922.9	FMNL1	1.935968875	0.06922724	0.052871513	0.050284289	0.15747037	3.33E-05	7.69E-05	21	30	30
ENSG00000014138.4	POLA2	1.931364489	0.086339271	0.053437993	0.033371668	0.06636807	0.008610332	0.009235066	13	16	16
ENSG00000197619.9	ZNF615	-1.930277923	-0.323311243	0.053572411	0.002203882	0.101350932	0.001048269	0.001548886	3	5	5
ENSG00000134905.12	CARS2	1.927958702	0.024156228	0.053860263	0.341122351	0.172004123	1.33E-05	3.42E-05	71	85	85
ENSG00000110218.4	PANX1	1.927485065	0.077055009	0.053919208	0.041821659	0.079725772	0.003856256	0.004677881	14	14	14
ENSG00000155393.8	HEATR3	1.927254495	0.021006095	0.053947922	0.49035011	0.681924586	7.21E-27	3.64E-24	54	54	54
ENSG00000211584.9	SLC48A1	-1.92702209	-0.081553412	0.053976877	0.040754763	0.074760122	0.005197447	0.006041695	25	27	27
ENSG00000187372.9	PCDHB13	-1.926795189	-0.038679094	0.054005159	0.125124756	0.050564506	0.022394273	0.020321973	38	47	47
ENSG00000086666.14	ZFAND6	1.926147741	0.040844048	0.054085929	0.121733713	0.189481747	4.32E-06	1.26E-05	36	41	41
ENSG00000106524.4	ANKMY2	-1.923829479	-0.475703378	0.054375961	0.000809177	0.095874338	0.001459044	0.002047228	2	2	2
ENSG00000254901.3	MEF2BNB	1.920424165	0.081328675	0.054804344	0.02742399	0.054593706	0.017531976	0.016792768	13	14	14
ENSG00000163702.14	IL17RC	1.915762094	0.025787497	0.055395385	0.310943638	0.448250354	1.06E-14	1.97E-13	28	34	34
ENSG00000176209.7	SMIM19	1.914328258	0.051798725	0.055578226	0.073883458	0.128029871	0.000206668	0.000385899	23	24	24
ENSG00000103549.17	RNF40	-1.913043896	-0.036639899	0.055742433	0.159055669	0.182793374	6.66E-06	1.85E-05	29	34	34
ENSG00000196967.6	ZNF585A	1.912126303	1.19220527	0.055859996	0.00012984	0.105053474	0.000837929	0.001281453	1	1	1
ENSG00000127399.10	LRRC61	-1.911756285	-0.022835409	0.055907461	0.240236968	0.382508472	3.37E-12	3.78E-11	23	25	25
ENSG00000204632.7	HLA-G	-1.907846159	-0.048998028	0.056411103	0.102798075	0.475583829	7.93E-16	1.93E-14	60	87	87
ENSG00000144567.6	FAM134A	1.904279762	0.056381205	0.056873758	0.069726601	0.215507082	7.84E-07	2.78E-06	40	45	45
ENSG00000136197.8	C7orf25	1.901772469	0.043818704	0.057200907	0.104688	0.182581436	6.75E-06	1.87E-05	20	21	21
ENSG00000050426.11	LETMD1	1.901628111	0.070654669	0.05721979	0.039887325	0.038034135	0.048368662	0.037877798	13	15	15
ENSG00000176102.7	CSTF3	-1.900091456	-0.052198772	0.057421119	0.06443469	0.066212283	0.008691483	0.009310812	33	35	35
ENSG00000137491.10	SLCO2B1	-1.898439101	-0.076937404	0.057638263	0.036285686	0.039844808	0.043227463	0.034586778	21	25	25
ENSG00000141219.11	C17orf80	1.896921776	0.038745457	0.057838263	0.139352576	0.078520899	0.004145893	0.0049691	47	51	51
ENSG00000085719.7	CPNE3	1.896253043	0.03964747	0.057926592	0.116200783	0.135525356	0.000130316	0.000258824	40	50	50
ENSG00000111364.11	DDX55	-1.895915501	-0.039630255	0.057971219	0.121651999	0.079900198	0.003816037	0.004645021	61	67	67
ENSG00000125551.14	PLGLB2	-1.890797593	-0.092884477	0.058651369	0.025223333	0.134249033	0.000140986	0.000276907	4	27	27
ENSG00000176659.5	C20orf197	1.890285478	0.049894319	0.05871979	0.108586289	0.273805749	1.42E-08	7.27E-08	7	8	8
ENSG00000166145.10	SPINT1	1.889057173	0.029502867	0.058884168	0.284890792	0.067223009	0.008178357	0.008837735	61	68	68
ENSG00000106701.7	FSD1L	-1.886525556	-0.084345028	0.059224168	0.035498495	0.035066542	0.058213691	0.0438872	15	16	16
ENSG00000114354.8	TFG	1.885310229	0.064292314	0.059387966	0.092557329	0.158305265	3.16E-05	7.35E-05	19	21	21
ENSG00000151365.2	THRSP	-1.883019106	-0.055978418	0.059697779	0.057253703	0.117488381	0.000393748	0.000672851	12	13	13
ENSG00000237541.3	HLA-DQA2	-1.881894342	-0.087047626	0.059850363	0.046526606	0.253013514	6.13E-08	2.78E-07	27	60	60
ENSG00000148719.10	DNAJB12	1.876444783	0.036763205	0.06059423	0.149663063	0.047144175	0.027590569	0.02412753	38	45	45
ENSG00000108551.4	RASD1	-1.874642575	-0.041112642	0.060841912	0.129700617	0.073517654	0.005600516	0.006444584	38	57	57
ENSG00000105856.9	HBP1	-1.874293327	-0.132540447	0.060890007	0.012283823	0.038356089	0.047410145	0.037292297	1	1	1
ENSG00000188529.10	SRSF10	1.873046386	0.090616979	0.06106198	0.024125935	0.070100225	0.006878227	0.007658786	10	13	13
ENSG00000152292.12	SH2D6	1.871670025	0.022987104	0.061252269	0.384682064	0.556068345	1.63E-19	9.45E-18	14	16	16
ENSG00000157601.9	MX1	1.871286014	0.066580132	0.061305448	0.034175929	0.078130334	0.004244369	0.005065306	8	8	8
ENSG00000162399.6	BSND	-1.871208546	-0.03724001	0.061316181	0.149934968	0.3344271	1.58E-10	1.22E-09	19	19	19
ENSG00000159208.11	C1orf51	1.87076361	0.090328979	0.061377854	0.026508664	0.033473949	0.064340169	0.047533391	15	17	17
ENSG00000157181.10	C1orf27	-1.870301547	-0.03770575	0.061441955	0.144306294	0.080872335	0.003599434	0.004431689	64	70	70
ENSG00000155367.11	PPM1J	1.869895858	0.052369459	0.061498281	0.074357441	0.040676576	0.041058764	0.033219757	23	28	28
ENSG00000129925.6	TMEM8A	-1.868311612	-0.040402367	0.061718649	0.138497118	0.470450537	1.30E-15	2.96E-14	27	34	34
ENSG00000130762.10	ARHGEF16	-1.867107406	-0.094202038	0.06188659	0.025252896	0.045934316	0.029710977	0.025592637	6	6	6
ENSG00000122912.10	SLC25A16	-1.866653924	-0.072592872	0.061949932	0.045953079	0.071090872	0.006480371	0.007274819	31	35	35
ENSG00000113272.9	THG1L	-1.86586435	-0.066291743	0.062060346	0.042104461	0.087990654	0.002345938	0.003076851	9	9	9
ENSG00000168614.13	NBPF9	-1.865158621	-0.122007009	0.062159174	0.01546408	0.060329696	0.012391511	0.012617265	7	14	14
ENSG00000169224.8	GCSAML	1.864489477	0.055993441	0.062252998	0.065409171	0.061991584	0.011208961	0.011539393	25	30	30
ENSG00000005884.13	ITGA3	1.864356388	0.035284833	0.062271673	0.169618875	0.129024018	0.000194434	0.000366419	52	57	57
ENSG00000151746.9	BICD1	-1.862559736	-0.05465409	0.062524234	0.065293901	0.041701338	0.038540535	0.031610655	27	30	30
ENSG00000125611.11	CHCHD5	-1.862282006	-0.047735481	0.06256335	0.081757543	0.077800214	0.004329427	0.005152916	33	37	37
ENSG00000074696.8	PTPLAD1	-1.861003233	-0.041821068	0.06274372	0.089966185	0.095127453	0.001526262	0.002128037	30	34	34
ENSG00000153822.9	KCNJ16	1.859676674	0.114755492	0.062931284	0.012208474	0.050848629	0.022010301	0.020076542	4	4	4
ENSG00000101246.15	ARFRP1	1.85785683	0.058142406	0.063189348	0.059079802	0.054853294	0.017258221	0.016579941	19	21	21
ENSG00000164880.11	INTS1	1.856747337	0.024745389	0.063347109	0.271251257	0.302153391	1.82E-09	1.10E-08	48	74	74
ENSG00000185055.6	EFCAB10	-1.854790942	-0.01446208	0.063626086	0.717943505	0.116863861	0.000409021	0.000695255	120	136	136
ENSG00000069712.9	KIAA1107	1.853900585	0.060923979	0.063753384	0.044621035	0.102207894	0.000995347	0.001481832	10	11	11
ENSG00000057608.12	GDI2	-1.852684097	-0.062867708	0.063927651	0.044208808	0.058485319	0.01385212	0.013853258	26	30	30
ENSG00000161798.6	AQP5	-1.851655346	-0.036165076	0.06407533	0.197914075	0.246450158	9.66E-08	4.23E-07	20	24	24
ENSG00000254772.5	EEF1G	1.851572417	0.083599547	0.064087247	0.026873112	0.055027537	0.017076905	0.016419129	7	8	8
ENSG00000166794.4	PPIB	-1.84421779	-0.063304909	0.065151407	0.049320317	0.039368843	0.044521456	0.03542977	22	26	26
ENSG00000024048.6	UBR2	-1.843702761	-0.041850392	0.06522647	0.115013877	0.188874264	4.50E-06	1.30E-05	34	39	39
ENSG00000153820.8	SPHKAP	-1.842890374	-0.06276554	0.065345018	0.050640677	0.122241011	0.000294606	0.000520728	9	12	12
ENSG00000178028.9	DMAP1	1.839612544	0.030692362	0.065825141	0.18354371	0.044590651	0.032262565	0.027386269	57	66	66
ENSG00000167608.7	TMC4	1.837561544	0.030927926	0.06612704	0.176173259	0.209990018	1.13E-06	3.91E-06	35	55	55
ENSG00000224153.2	RP11-433C9.2	1.83476043	0.106856979	0.066541194	0.017825771	0.05576087	0.016334728	0.015843345	5	5	5
ENSG00000170322.10	NFRKB	1.833577176	0.060268994	0.066716783	0.057240846	0.162118412	2.48E-05	5.93E-05	15	16	16
ENSG00000157322.12	CLEC18A	-1.830336175	-0.154369634	0.067199685	0.007544133	0.108569717	0.000677142	0.001072179	3	8	8
ENSG00000037474.10	NSUN2	1.828393255	0.025240754	0.067490553	0.265245216	0.567328963	4.41E-20	3.43E-18	25	30	30
ENSG00000156990.10	RPUSD3	1.828347283	0.079871238	0.067497448	0.039337816	0.209000545	1.21E-06	4.13E-06	5	7	7
ENSG00000144199.7	FAHD2B	-1.827792795	-0.141039314	0.067580655	0.008865992	0.049488908	0.023910773	0.021426292	7	12	12
ENSG00000170421.7	KRT8	1.827569543	0.032635647	0.06761418	0.202449215	0.05155445	0.021085184	0.019412916	61	68	68
ENSG00000160213.5	CSTB	1.825706058	0.058989549	0.06789455	0.047738116	0.03573609	0.055823319	0.042428729	12	14	14
ENSG00000204178.5	TMEM57	1.825558744	0.074908625	0.067916755	0.035027799	0.063718903	0.010100217	0.01058657	9	12	12
ENSG00000188878.12	FBF1	-1.824249552	-0.07057389	0.068114353	0.045763425	0.104745095	0.000853719	0.001299419	20	22	22
ENSG00000172058.11	SERF1A	1.82358755	0.089464394	0.06821445	0.032372062	0.0411761	0.039810682	0.032417577	24	32	32
ENSG00000243725.2	TTC4	1.822111955	0.089594321	0.068438	0.022527325	0.034925661	0.058730139	0.044191782	7	7	7
ENSG00000184730.6	APOBR	-1.819976307	-0.064889324	0.068762613	0.048503229	0.110179925	0.000614121	0.000987869	11	15	15
ENSG00000170577.7	SIX2	1.819928421	0.022659233	0.068769906	0.370145566	0.077618822	0.004376888	0.005202394	85	90	90
ENSG00000186417.9	GLDN	1.819468127	0.035200827	0.068840041	0.268074115	0.067287322	0.008146757	0.008809981	59	69	69
ENSG00000117152.9	RGS4	1.817597228	0.041559806	0.069125716	0.130946844	0.140253073	9.73E-05	0.000199636	31	34	34
ENSG00000064666.10	CNN2	1.816256591	0.050913532	0.069331021	0.073987057	0.149600077	5.44E-05	0.000119293	15	16	16
ENSG00000042493.11	CAPG	-1.815714684	-0.037321874	0.06941415	0.117754839	0.121942782	0.000300025	0.000529055	26	27	27
ENSG00000051180.12	RAD51	-1.814522667	-0.031670466	0.069597296	0.224120259	0.049693527	0.02361442	0.021211545	61	67	67
ENSG00000129484.9	PARP2	-1.813835573	-0.052947841	0.069703044	0.071537621	0.089980073	0.002081195	0.002787501	17	19	19
ENSG00000184492.5	FOXD4L1	-1.813043201	-0.064580503	0.069825159	0.04044974	0.234468799	2.19E-07	9.00E-07	9	22	22
ENSG00000185721.7	DRG1	-1.809740415	-0.687461837	0.070336052	0.000608641	0.042195872	0.037382829	0.030830947	2	3	3
ENSG00000254997.2	KRTAP5-9	-1.809465543	-0.082007466	0.070378709	0.029243211	0.068534983	0.007557421	0.008273845	14	15	15
ENSG00000100601.5	ALKBH1	-1.806161618	-0.072181817	0.070893098	0.034307515	0.046152975	0.029315753	0.025316977	10	14	14
ENSG00000117305.10	HMGCL	1.803888865	0.075177318	0.071248731	0.036089718	0.130849745	0.000173802	0.000332317	17	23	23
ENSG00000135956.4	TMEM127	-1.803479682	-0.06532475	0.071312914	0.031502134	0.0345629	0.060082163	0.045036676	9	20	20
ENSG00000171503.7	ETFDH	1.800933649	0.022182101	0.071713339	0.454571783	0.38686866	2.34E-12	2.72E-11	41	52	52
ENSG00000111540.11	RAB5B	1.80006466	0.059744044	0.071850429	0.058889321	0.050791473	0.022087	0.020125744	30	39	39
ENSG00000136068.10	FLNB	1.79920992	0.022609915	0.071985481	0.305551372	0.196491324	2.74E-06	8.50E-06	71	78	78
ENSG00000150760.8	DOCK1	1.7990204	0.051905451	0.072015454	0.068518646	0.073969955	0.005450283	0.006292267	16	18	18
ENSG00000232859.5	LYRM9	-1.798596225	-0.022982549	0.072082575	0.363027081	0.416355936	1.88E-13	2.84E-12	35	38	38
ENSG00000204389.8	HSPA1A	-1.798211901	-0.351256345	0.072143434	0.001492921	0.079551499	0.003896864	0.004720664	2	3	3
ENSG00000110200.4	ANAPC15	1.795965552	1.32178926	0.072499996	0.000108258	0.099689607	0.001158951	0.001689837	1	1	1
ENSG00000106245.5	BUD31	1.793617025	0.434013767	0.072874317	0.00073235	0.064499798	0.009635902	0.010165519	2	2	2
ENSG00000173113.2	TRMT112	1.792774802	0.059769875	0.07300894	0.051609353	0.059247042	0.013228897	0.013305219	19	20	20
ENSG00000188573.7	FBLL1	-1.791649487	-0.055995762	0.073189131	0.044097525	0.293347774	3.47E-09	2.00E-08	28	31	31
ENSG00000085832.12	EPS15	1.791185047	0.048766139	0.073263605	0.09623093	0.111627536	0.000562446	0.000914309	12	14	14
ENSG00000196372.8	ASB13	1.788818052	0.024862988	0.073644123	0.277498335	0.102628191	0.00097037	0.001450753	84	95	95
ENSG00000091536.12	MYO15A	1.788359877	0.031607715	0.073717965	0.167148101	0.279474711	9.47E-09	5.09E-08	19	21	21
ENSG00000158985.9	CDC42SE2	1.788321079	0.053788035	0.073724221	0.045400987	0.140810958	9.40E-05	0.00019353	3	3	3
ENSG00000159023.14	EPB41	-1.787885565	-0.030416101	0.073794472	0.142958762	0.292759085	3.62E-09	2.08E-08	30	31	31
ENSG00000249481.2	SPATS1	-1.7874301	-0.047955092	0.073868	0.07700087	0.103339503	0.000929508	0.001401509	28	30	30
ENSG00000138802.7	SEC24B	1.785440767	0.068480776	0.074189851	0.03306597	0.037019075	0.051524712	0.039916312	14	15	15
ENSG00000145861.7	C1QTNF2	1.78482357	0.024237168	0.074289939	0.354798434	0.218283745	6.52E-07	2.37E-06	62	70	70
ENSG00000060491.12	OGFR	1.782659569	0.073272753	0.074641737	0.037844798	0.041713687	0.03851118	0.031606783	13	17	17
ENSG00000162344.3	FGF19	-1.781019708	-0.032125488	0.074909231	0.181562322	0.037596742	0.049703223	0.038794074	62	66	66
ENSG00000112053.9	SLC26A8	1.780212516	0.069670088	0.075041188	0.035400761	0.15789537	3.24E-05	7.52E-05	21	24	24
ENSG00000100075.5	SLC25A1	-1.779117547	-0.037168437	0.075220493	0.164682394	0.362232668	1.77E-11	1.70E-10	22	26	26
ENSG00000103966.5	EHD4	1.777717002	0.024309655	0.075450346	0.267253487	0.305156636	1.45E-09	8.99E-09	32	34	34
ENSG00000163382.7	APOA1BP	1.777203126	0.036354343	0.075534825	0.131969022	0.193448893	3.34E-06	1.01E-05	25	29	29
ENSG00000188385.7	JAKMIP3	-1.776430891	-0.023041597	0.075661923	0.37518328	0.526712476	4.25E-18	1.69E-16	27	31	31
ENSG00000135773.8	CAPN9	1.773184043	0.033768611	0.076198215	0.164012241	0.109493876	0.000640227	0.001022886	53	55	55
ENSG00000124766.4	SOX4	1.772998835	0.022981799	0.0762289	0.365196479	0.111915024	0.000552709	0.000900549	84	97	97
ENSG00000154146.8	NRGN	1.772915921	0.044374347	0.07624264	0.086670459	0.141866194	8.80E-05	0.000182342	32	34	34
ENSG00000001461.12	NIPAL3	1.770583391	1.118970225	0.076630006	0.000135684	0.0419887	0.037863392	0.031169146	1	1	1
ENSG00000110871.10	COQ5	1.769635824	0.043185735	0.076787827	0.072854247	0.206348104	1.44E-06	4.83E-06	48	49	49
ENSG00000178695.4	KCTD12	1.769476513	0.059491021	0.076814387	0.046406564	0.068387637	0.007624727	0.008332059	24	27	27
ENSG00000185479.5	KRT6B	1.766526936	0.116712927	0.077307487	0.013510836	0.036549994	0.053054881	0.040824567	14	17	17
ENSG00000178226.6	PRSS36	-1.766521813	-0.057737547	0.077308345	0.055431782	0.091096479	0.00194589	0.002626166	4	7	7
ENSG00000241553.8	ARPC4	1.765371078	0.047891666	0.077501421	0.090381471	0.046695079	0.028358963	0.024665329	33	37	37
ENSG00000214872.4	SMTNL1	-1.763202298	-0.022507514	0.077866376	0.337499217	0.299069131	2.28E-09	1.36E-08	55	72	72
ENSG00000181744.4	C3orf58	1.761995792	2.345946993	0.078070008	3.07E-05	0.037450383	0.050158289	0.039042607	1	2	2
ENSG00000241106.2	HLA-DOB	1.761128502	0.027544028	0.078216656	0.358480251	0.556642147	1.53E-19	9.00E-18	59	69	69
ENSG00000071051.9	NCK2	-1.759918051	-0.031471022	0.078421702	0.163392319	0.127053123	0.000219429	0.000406167	58	66	66
ENSG00000116991.6	SIPA1L2	1.756739158	0.033707637	0.07896228	0.140155796	0.054769209	0.017346417	0.016651104	51	58	58
ENSG00000109163.6	GNRHR	1.755376114	0.069161141	0.079194995	0.032028139	0.094762598	0.001560208	0.002169383	6	8	8
ENSG00000198862.9	LTN1	-1.754737893	-0.046261283	0.079304151	0.093693266	0.109254169	0.000649606	0.001035065	26	28	28
ENSG00000167702.7	KIFC2	-1.754707639	-0.060695273	0.079309329	0.050965974	0.105379114	0.000821571	0.001260796	7	7	7
ENSG00000090376.4	IRAK3	1.752488462	0.042292039	0.079689852	0.095654205	0.038949177	0.045695673	0.036168914	52	56	56
ENSG00000135245.9	HILPDA	1.751326248	0.063583233	0.079889729	0.041180415	0.072031464	0.006123997	0.006947517	8	13	13
ENSG00000104870.8	FCGRT	1.749307164	0.034881975	0.080237938	0.140709745	0.166863758	1.84E-05	4.57E-05	29	36	36
ENSG00000010282.10	HHATL	1.748475549	0.0478136	0.080381716	0.076224895	0.125856703	0.000236126	0.000431429	28	29	29
ENSG00000214960.5	ISPD	1.748118491	0.032720781	0.080443512	0.158758727	0.048563272	0.025299544	0.022445909	49	58	58
ENSG00000136143.9	SUCLA2	-1.747884404	-0.028268346	0.080484046	0.241933413	0.08672499	0.002531567	0.003280178	64	72	72
ENSG00000111877.13	MCM9	1.747830472	0.083311371	0.080493387	0.024834562	0.045660758	0.030213129	0.025933661	8	9	9
ENSG00000111801.11	BTN3A3	-1.744229208	-0.048857234	0.08111913	0.076960642	0.174314175	1.15E-05	3.00E-05	23	24	24
ENSG00000180263.9	FGD6	1.742644128	0.031287786	0.081395797	0.192865001	0.038482821	0.047038268	0.037040967	51	54	54
ENSG00000161542.12	PRPSAP1	-1.742539111	-0.02521883	0.081414154	0.320867819	0.439653215	2.34E-14	4.10E-13	35	40	40
ENSG00000178187.3	ZNF454	-1.73930234	-0.036679707	0.081981596	0.148579931	0.331932337	1.92E-10	1.45E-09	16	19	19
ENSG00000188011.5	CXXC11	1.736417068	0.067335336	0.082490116	0.041412638	0.103258233	0.000934089	0.001407816	4	4	4
ENSG00000151353.10	TMEM18	-1.735094871	-0.030399473	0.082724003	0.207151987	0.130230631	0.000180543	0.000343721	60	93	93
ENSG00000157500.6	APPL1	-1.734598698	-0.054182315	0.08281191	0.070243601	0.068835965	0.007421783	0.008155639	15	18	18
ENSG00000066923.13	STAG3	1.733399916	0.028296393	0.083024613	0.220931357	0.405648512	4.76E-13	6.36E-12	31	41	41
ENSG00000134245.13	WNT2B	-1.729877354	-0.035955917	0.08365219	0.139788385	0.298997846	2.29E-09	1.36E-08	20	20	20
ENSG00000103852.8	TTC23	1.729449575	0.036177986	0.083728664	0.135379256	0.308820835	1.11E-09	6.99E-09	15	15	15
ENSG00000126217.16	MCF2L	1.727251723	0.07257161	0.084122465	0.031880307	0.073673595	0.005548257	0.00639485	10	12	12
ENSG00000189042.9	ZNF567	1.726824845	0.10036292	0.084199125	0.018585702	0.072195938	0.00606373	0.006890195	26	31	31
ENSG00000122786.15	CALD1	1.725128895	0.043468875	0.084504246	0.083402294	0.065811558	0.008903777	0.009500829	43	49	49
ENSG00000145020.10	AMT	1.724919343	0.0350113	0.084542009	0.135783516	0.289231559	4.68E-09	2.65E-08	18	25	25
ENSG00000205363.4	C15orf59	1.724486828	0.107464237	0.084619995	0.016695863	0.080507952	0.003679145	0.004513683	1	1	1
ENSG00000131015.4	ULBP2	-1.724283664	-0.035378741	0.084656647	0.146144813	0.22439368	4.33E-07	1.66E-06	35	46	46
ENSG00000111666.6	CHPT1	-1.722691349	-0.030769187	0.084944356	0.189181124	0.35671361	2.75E-11	2.55E-10	36	40	40
ENSG00000138594.8	TMOD3	1.721504304	0.074773605	0.085159352	0.032896893	0.050219562	0.022869626	0.020684355	28	30	30
ENSG00000131067.12	GGT7	-1.721503293	-0.05741904	0.085159535	0.049670425	0.062871227	0.010629793	0.011036298	47	52	52
ENSG00000040199.14	PHLPP2	1.720758564	0.041895336	0.085294644	0.101086457	0.155892213	3.67E-05	8.39E-05	20	20	20
ENSG00000153113.19	CAST	1.720405645	0.038336313	0.085358732	0.137104669	0.180580973	7.67E-06	2.09E-05	22	22	22
ENSG00000157510.9	AFAP1L1	1.720283822	0.037150418	0.085380863	0.122822195	0.321437488	4.28E-10	3.00E-09	12	12	12
ENSG00000138031.10	ADCY3	1.719732256	0.045361435	0.085481122	0.076336501	0.079327928	0.003949585	0.004773088	25	28	28
ENSG00000138085.12	ATRAID	1.719660163	0.056405998	0.085494233	0.049589136	0.064091952	0.009875659	0.010376961	8	8	8
ENSG00000163131.6	CTSS	-1.719149904	-0.070918453	0.08558708	0.036785363	0.076354984	0.004722328	0.005553274	18	20	20
ENSG00000182050.9	MGAT4C	-1.716150008	-0.068168753	0.08613459	0.032040258	0.053947421	0.018232832	0.017314048	5	6	6
ENSG00000178623.7	GPR35	-1.714689918	-0.06201377	0.086402093	0.044747466	0.092013124	0.001841371	0.002498452	20	23	23
ENSG00000077232.12	DNAJC10	-1.713449226	-0.039983429	0.086629927	0.102537816	0.136663923	0.000121473	0.00024348	31	32	32
ENSG00000124780.9	KCNK17	1.712047133	0.061136911	0.086887983	0.044775734	0.04125579	0.039615228	0.032280713	21	21	21
ENSG00000184047.11	DIABLO	-1.711469674	-0.047315314	0.086994445	0.088030888	0.115645632	0.000440521	0.00074344	36	44	44
ENSG00000111261.9	MANSC1	-1.709707147	-1.024465333	0.08732004	0.000124177	0.037283701	0.050681829	0.039410059	2	2	2
ENSG00000110651.7	CD81	1.70885842	0.110767063	0.087477178	0.017414138	0.050833916	0.022030018	0.020084169	14	15	15
ENSG00000214300.6	SPDYE3	1.708152428	0.173845109	0.087608063	0.005680844	0.036575922	0.052969081	0.040776286	11	12	12
ENSG00000198646.9	NCOA6	-1.707118823	-0.046728358	0.087799969	0.062368797	0.199446353	2.26E-06	7.15E-06	23	33	33
ENSG00000101265.11	RASSF2	1.704378833	0.043915546	0.088310336	0.107925321	0.086045596	0.002637176	0.003395644	39	41	41
ENSG00000233932.3	CTXN2	-1.70351306	-0.05980136	0.088472096	0.062775506	0.033281413	0.065125394	0.04801713	23	23	23
ENSG00000145365.10	TIFA	1.703029626	0.06032828	0.088562524	0.047858683	0.141355164	9.09E-05	0.000187442	43	47	47
ENSG00000204978.2	C19orf69	-1.702926274	-0.057607196	0.088581866	0.043116011	0.037246181	0.050800459	0.039476271	16	20	20
ENSG00000151366.8	NDUFC2	-1.701479166	-0.03646015	0.088853047	0.108534101	0.25114371	6.98E-08	3.13E-07	17	17	17
ENSG00000116679.11	IVNS1ABP	1.700353943	0.040320617	0.089064369	0.09061919	0.036100084	0.054567044	0.041688876	27	34	34
ENSG00000172731.9	LRRC20	-1.69705953	-0.027514123	0.089685406	0.214855115	0.134413086	0.000139568	0.000274884	53	56	56
ENSG00000108375.8	RNF43	1.697029193	0.021502345	0.089691141	0.20872796	0.158100461	3.20E-05	7.43E-05	48	48	48
ENSG00000204179.6	PTPN20A	1.69253766	0.16363941	0.090543506	0.005665323	0.126650929	0.000224908	0.00041328	3	10	10
ENSG00000197013.5	ZNF429	1.690120885	0.028692323	0.09100483	0.209489411	0.410904772	3.02E-13	4.24E-12	29	34	34
ENSG00000111886.9	GABRR2	-1.689990287	-0.027419246	0.091029813	0.260267775	0.193412303	3.35E-06	1.01E-05	51	56	56
ENSG00000127081.9	ZNF484	-1.689311966	-0.048723086	0.091159661	0.065998494	0.048878036	0.024818282	0.022096521	29	31	31
ENSG00000175575.8	PAAF1	1.68840928	0.043680883	0.09133269	0.10325671	0.139040202	0.000104882	0.000213956	25	29	29
ENSG00000116141.11	MARK1	1.688270384	0.04286464	0.091359338	0.079956615	0.061048212	0.011865519	0.012130575	30	34	34
ENSG00000168243.6	GNG4	1.688252689	0.031940252	0.091362733	0.180462989	0.040801471	0.040742966	0.033020045	48	53	53
ENSG00000156030.8	ELMSAN1	-1.688026371	-0.028703413	0.091406167	0.187155998	0.243131812	1.21E-07	5.18E-07	40	42	42
ENSG00000134014.12	ELP3	1.686663651	0.021007997	0.091668045	0.349364843	0.214320909	8.49E-07	3.00E-06	85	91	91
ENSG00000166471.6	TMEM41B	-1.685945651	-0.058208177	0.091806268	0.043350242	0.040266996	0.042112253	0.033878389	23	24	24
ENSG00000110455.9	ACCS	-1.684176871	-0.050082772	0.092147492	0.086917215	0.198631944	2.39E-06	7.50E-06	17	17	17
ENSG00000104432.8	IL7	1.682920563	0.029150985	0.09239047	0.181915253	0.315947228	6.49E-10	4.34E-09	40	41	41
ENSG00000182957.11	SPATA13	-1.682002881	-0.029017249	0.092568281	0.202511648	0.179621346	8.16E-06	2.21E-05	65	77	77
ENSG00000137764.15	MAP2K5	1.681592603	0.0416639	0.092647866	0.093149178	0.098647472	0.001234227	0.001783156	31	32	32
ENSG00000139998.10	RAB15	-1.680630583	-0.058041785	0.092834692	0.03769077	0.054562498	0.017565183	0.01682002	21	24	24
ENSG00000145920.10	CPLX2	1.680603266	0.346009801	0.092840001	0.001286958	0.040453054	0.041630268	0.033566983	1	1	1
ENSG00000153560.7	UBP1	-1.679640991	-0.023326261	0.093027187	0.317340398	0.454967377	5.68E-15	1.11E-13	41	42	42
ENSG00000172318.4	B3GALT1	1.679443997	0.049070604	0.093065545	0.072135983	0.066104294	0.008748187	0.009360217	25	27	27
ENSG00000178665.10	ZNF713	1.678851782	0.027380484	0.093180934	0.237483727	0.327591107	2.68E-10	1.97E-09	27	34	34
ENSG00000099954.14	CECR2	1.678776739	0.085818842	0.093195564	0.020541857	0.091077976	0.00194806	0.002628091	5	6	6
ENSG00000140299.7	BNIP2	1.678546652	0.02737088	0.093240431	0.210925005	0.167749544	1.74E-05	4.35E-05	42	48	48
ENSG00000133247.9	SUV420H2	-1.674058804	-0.063781722	0.094119043	0.049650048	0.080589551	0.003661143	0.004498272	13	14	14
ENSG00000037757.9	MRI1	1.67377718	0.027604717	0.094174399	0.199280151	0.146472941	6.61E-05	0.000141788	45	56	56
ENSG00000120686.7	UFM1	-1.673699696	-0.088776487	0.094189634	0.014875595	0.033058005	0.066049166	0.048552597	9	11	11
ENSG00000188690.8	UROS	1.673242413	0.051358016	0.094279584	0.062515589	0.188433536	4.63E-06	1.33E-05	10	11	11
ENSG00000011451.13	WIZ	-1.672959096	-0.085838154	0.094335349	0.020893803	0.03575701	0.055750306	0.042413518	4	5	5
ENSG00000134490.9	TMEM241	1.671755799	0.07229692	0.094572486	0.024586892	0.052348728	0.020091326	0.01872329	5	7	7
ENSG00000215305.5	VPS16	1.671501196	0.034859869	0.094622723	0.146432843	0.043530772	0.034433325	0.028876405	50	53	53
ENSG00000166839.12	ANKDD1A	-1.668954152	-0.035780774	0.095126466	0.115229743	0.104963723	0.000842495	0.001286765	29	30	30
ENSG00000076201.10	PTPN23	1.668912464	0.046190549	0.095134729	0.069614069	0.069949799	0.006940748	0.007713302	16	19	19
ENSG00000070540.8	WIPI1	1.668236615	0.045127064	0.095268765	0.071494036	0.106420387	0.00077136	0.001196196	12	13	13
ENSG00000139182.9	CLSTN3	-1.668180842	-0.043435079	0.095279833	0.087086884	0.08637132	0.002586006	0.003340926	21	95	95
ENSG00000188895.7	MSL1	-1.667560553	-0.031012241	0.095402994	0.142203222	0.284397232	6.65E-09	3.66E-08	17	18	18
ENSG00000102900.8	NUP93	-1.666557855	-0.068636468	0.095602355	0.036612874	0.044232076	0.032980774	0.027876363	21	22	22
ENSG00000135587.4	SMPD2	-1.66474294	-0.045883903	0.095964052	0.072201283	0.078670197	0.004108855	0.004936893	18	21	21
ENSG00000115568.11	ZNF142	-1.664735452	-0.034502345	0.095965547	0.163838554	0.050621085	0.022317269	0.020272899	42	48	48
ENSG00000028310.13	BRD9	1.66303288	0.171372271	0.096305854	0.005436951	0.043707962	0.034060228	0.0286192	7	15	15
ENSG00000188086.8	PRSS45	-1.662103118	-0.090759906	0.096492101	0.042009636	0.146135784	6.75E-05	0.000144444	30	34	34
ENSG00000007341.14	ST7L	1.662074467	0.065870514	0.096497844	0.037290959	0.108204499	0.000692306	0.001090798	12	12	12
ENSG00000196151.6	WDSUB1	-1.661374106	-0.0490888	0.096638335	0.069552127	0.209536307	1.17E-06	4.01E-06	7	7	7
ENSG00000167536.9	DHRS13	1.660684773	0.067196818	0.096776773	0.043436572	0.055283196	0.016814358	0.016210758	22	24	24
ENSG00000172348.10	RCAN2	1.659258686	0.028028983	0.097063677	0.327641685	0.142170952	8.64E-05	0.000179349	128	151	151
ENSG00000048471.9	SNX29	1.65901857	0.088592786	0.09711205	0.021447482	0.037789718	0.049109764	0.038356261	40	41	41
ENSG00000116977.14	LGALS8	1.6586828	0.030984052	0.097179727	0.170014235	0.179347141	8.31E-06	2.24E-05	33	36	36
ENSG00000106683.10	LIMK1	1.658142978	0.081117434	0.097288611	0.023180878	0.038102006	0.048164936	0.037768428	7	10	10
ENSG00000163220.10	S100A9	1.657328274	0.043164356	0.097453124	0.075939254	0.060776556	0.012061682	0.012320438	22	25	25
ENSG00000115339.9	GALNT3	-1.657255752	-0.027508297	0.097467779	0.260658127	0.513039167	1.81E-17	6.28E-16	27	30	30
ENSG00000149735.2	GPHA2	-1.657210845	-0.125199435	0.097476855	0.015116026	0.05715919	0.01500885	0.014778675	3	3	3
ENSG00000140416.15	TPM1	1.656076891	0.02376283	0.097706248	0.286885695	0.380515394	3.98E-12	4.38E-11	44	49	49
ENSG00000101473.12	ACOT8	-1.653725002	-0.052338974	0.0981834	0.058094843	0.053918157	0.018265232	0.017335507	25	26	26
ENSG00000137809.12	ITGA11	-1.652293714	-0.053377735	0.09847469	0.06300992	0.072138246	0.006084802	0.006911918	17	21	21
ENSG00000164488.7	DACT2	-1.650028299	-0.018481077	0.098937148	0.349370397	0.200551771	2.10E-06	6.72E-06	69	94	94
ENSG00000175318.7	GRAMD2	-1.649030269	-0.049799043	0.099141434	0.067011	0.063087194	0.01049227	0.010925584	23	25	25
ENSG00000123815.7	ADCK4	-1.646619875	-0.036141941	0.099636203	0.104402702	0.141407034	9.06E-05	0.000186949	30	34	34
ENSG00000160867.10	FGFR4	1.645669387	0.039794687	0.099831845	0.089436467	0.147584403	6.17E-05	0.000133443	27	36	36
ENSG00000072401.10	UBE2D1	-1.641740619	-0.056582468	0.10064377	0.045389655	0.05527519	0.016822516	0.016214204	16	20	20
ENSG00000111254.3	AKAP3	1.640134882	0.03299318	0.100977125	0.14879282	0.228239667	3.34E-07	1.31E-06	44	45	45
ENSG00000181007.7	ZFP82	-1.638956578	-0.053269827	0.101222303	0.066777847	0.125221741	0.000245491	0.000444636	30	39	39
ENSG00000072135.8	PTPN18	1.638655812	0.052674663	0.101284962	0.055768653	0.172144185	1.32E-05	3.40E-05	8	12	12
ENSG00000171109.14	MFN1	1.637952412	0.02612168	0.101431621	0.19785207	0.32654079	2.91E-10	2.11E-09	25	26	26
ENSG00000140575.8	IQGAP1	1.63698267	0.031007968	0.101634091	0.169282689	0.388703356	2.01E-12	2.36E-11	18	21	21
ENSG00000160439.11	RDH13	1.636736822	0.149587759	0.101685472	0.006115895	0.057781157	0.014454638	0.014354367	6	11	11
ENSG00000128607.9	KLHDC10	-1.636235324	-0.031489734	0.101790346	0.17194473	0.049416202	0.024016985	0.021502166	40	44	44
ENSG00000253710.1	ALG11	-1.63531179	-0.06088196	0.101983703	0.038308142	0.053926644	0.01825583	0.017331234	8	8	8
ENSG00000146085.7	MUT	-1.635062044	-0.050407913	0.102036042	0.089982851	0.06349893	0.010235033	0.010699059	28	35	35
ENSG00000076356.6	PLXNA2	1.63468998	0.047196827	0.102114054	0.075175973	0.03626089	0.054021474	0.041343499	43	47	47
ENSG00000150551.10	LYPD1	1.634134324	0.019547785	0.102230649	0.395081747	0.126517017	0.000226761	0.000416254	82	114	114
ENSG00000174576.4	NPAS4	1.63334795	0.036503285	0.102395837	0.098005746	0.035263259	0.057500484	0.043442102	36	43	43
ENSG00000126858.12	RHOT1	1.633284763	0.043231944	0.10240912	0.074376814	0.07867701	0.004107173	0.004936549	25	32	32
ENSG00000133028.6	SCO1	1.632806274	0.054452046	0.102509747	0.060191555	0.167345565	1.78E-05	4.45E-05	10	11	11
ENSG00000153790.7	C7orf31	-1.630295976	-0.033411712	0.103038958	0.142127979	0.082895208	0.003187272	0.003990905	57	64	64
ENSG00000143437.16	ARNT	-1.630136722	-0.038202534	0.103072604	0.10813809	0.19620489	2.79E-06	8.63E-06	22	24	24
ENSG00000153551.9	CMTM7	1.629897031	0.029095197	0.103123261	0.174484572	0.339491916	1.07E-10	8.76E-10	21	21	21
ENSG00000164308.12	ERAP2	1.628716472	0.02022849	0.103373054	0.260405836	0.488549583	2.21E-16	6.16E-15	45	48	48
ENSG00000177191.2	B3GNT8	1.628188267	0.038883319	0.103484972	0.080274904	0.259387282	3.93E-08	1.85E-07	50	54	54
ENSG00000168615.7	ADAM9	1.627783424	0.050997099	0.103570817	0.053771368	0.051626152	0.020993447	0.019356026	24	27	27
ENSG00000218416.3	AC110619.2	-1.625631477	-0.03549463	0.104028075	0.117060114	0.195713464	2.89E-06	8.87E-06	19	23	23
ENSG00000056661.9	PCGF2	-1.625318057	-0.026320751	0.104094806	0.182197346	0.302706061	1.74E-09	1.06E-08	13	14	14
ENSG00000008735.10	MAPK8IP2	-1.625218079	-0.050906454	0.1041161	0.098657027	0.072543125	0.005938459	0.006784902	22	29	29
ENSG00000048162.15	NOP16	-1.623760201	-0.034890824	0.104426997	0.114625172	0.076820104	0.004592136	0.005425424	38	49	49
ENSG00000135823.9	STX6	1.622413934	0.023944162	0.104714748	0.272012352	0.086667041	0.002540408	0.003290429	73	80	80
ENSG00000127364.2	TAS2R4	-1.622281244	-0.034062928	0.104743143	0.122500405	0.367767676	1.13E-11	1.14E-10	34	37	37
ENSG00000110237.3	ARHGEF17	-1.622086549	-0.037653636	0.104784818	0.153257615	0.118235862	0.000376209	0.000645374	31	35	35
ENSG00000168314.13	MOBP	1.621651651	0.055267666	0.104877957	0.040185213	0.042393699	0.036929808	0.030549921	35	38	38
ENSG00000154845.11	PPP4R1	-1.620706789	-0.091543945	0.105080537	0.022705477	0.084796841	0.002842877	0.003622508	2	2	2
ENSG00000172771.7	EFCAB12	-1.620612195	-0.030443968	0.105100835	0.163368945	0.255252892	5.25E-08	2.40E-07	24	31	31
ENSG00000154096.9	THY1	-1.619461813	-0.05730834	0.105347936	0.052857103	0.052972413	0.019344407	0.01816962	22	23	23
ENSG00000168038.6	ULK4	-1.618139538	-0.125097204	0.105632529	0.010491272	0.096361178	0.001416822	0.001997494	30	38	38
ENSG00000136490.4	LIMD2	1.614394175	0.08734013	0.106441954	0.021809604	0.052824861	0.019518525	0.018318572	5	5	5
ENSG00000186895.2	FGF3	-1.612995712	-0.045373187	0.106745439	0.075565682	0.146801063	6.48E-05	0.00013943	22	24	24
ENSG00000007171.12	NOS2	1.611616061	0.018665446	0.107045514	0.447511812	0.544274942	6.19E-19	3.08E-17	35	39	39
ENSG00000142494.9	SLC47A1	-1.610608428	-0.043173961	0.107265096	0.066566647	0.063597947	0.010174125	0.010641288	23	39	39
ENSG00000163444.7	TMEM183A	-1.61005564	-0.021944105	0.10738571	0.60578195	0.181380135	7.29E-06	2.00E-05	109	125	125
ENSG00000187824.4	TMEM220	1.60949125	0.025749485	0.107508967	0.254813481	0.398038878	9.14E-13	1.16E-11	67	68	68
ENSG00000149257.9	SERPINH1	-1.60906481	-0.027576767	0.107602171	0.187157557	0.130977488	0.000172442	0.000330611	44	47	47
ENSG00000185963.9	BICD2	-1.608930451	-0.030769328	0.10763155	0.176508391	0.224805621	4.21E-07	1.62E-06	52	57	57
ENSG00000036448.5	MYOM2	-1.607339817	-0.020167754	0.107979844	0.382199813	0.436005126	3.26E-14	5.68E-13	62	81	81
ENSG00000178343.4	SHISA3	-1.607283084	-0.036608715	0.107992283	0.113128973	0.111492653	0.000567073	0.000920984	21	26	26
ENSG00000117091.5	CD48	-1.605426431	-1.060796856	0.108399992	0.000151043	0.033326789	0.064939433	0.047906377	1	1	1
ENSG00000124171.4	PARD6B	-1.605426431	-0.526236909	0.108399992	0.001248656	0.03950188	0.044155782	0.035194194	1	1	1
ENSG00000187764.7	SEMA4D	-1.604764472	-0.021821738	0.108545648	0.29765261	0.114669084	0.000467496	0.000782598	91	94	94
ENSG00000008394.8	MGST1	-1.604605089	-0.031136101	0.108580741	0.176146119	0.032609334	0.067946266	0.049752285	51	59	59
ENSG00000100197.16	CYP2D6	-1.604298714	-0.023225222	0.108648224	0.320487935	0.52345291	6.02E-18	2.32E-16	40	44	44
ENSG00000149488.11	TMC2	-1.602978246	-0.037700199	0.108939457	0.110205664	0.277483605	1.09E-08	5.77E-08	4	4	4
ENSG00000106049.4	HIBADH	1.602686997	0.044902969	0.109003776	0.08026342	0.115306848	0.0004497	0.000757354	29	32	32
ENSG00000125633.6	CCDC93	-1.602160058	-0.032300937	0.10912022	0.126467597	0.097850682	0.001295041	0.001855381	43	48	48
ENSG00000097046.8	CDC7	1.601151987	0.020770587	0.10934326	0.358465072	0.268860166	2.02E-08	1.01E-07	49	59	59
ENSG00000165140.5	FBP1	-1.598999264	-0.171588067	0.109820766	0.004764286	0.062371164	0.010955237	0.011326615	3	7	7
ENSG00000141867.13	BRD4	-1.596579426	-0.018871462	0.110359488	0.295753159	0.108303052	0.000688181	0.001086533	80	100	100
ENSG00000099940.7	SNAP29	-1.594336989	-0.053338147	0.110860577	0.048804815	0.117687594	0.000388996	0.000665917	16	21	21
ENSG00000180336.13	C17orf104	1.593666816	0.029756566	0.11101068	0.158903054	0.183118284	6.52E-06	1.81E-05	32	37	37
ENSG00000139187.5	KLRG1	1.592377067	2.383968572	0.111300006	2.37E-05	0.221172952	5.37E-07	2.01E-06	1	42	42
ENSG00000180891.8	CUEDC1	1.592071909	0.33261715	0.111368548	0.00131609	0.032828421	0.067012848	0.049158838	2	2	2
ENSG00000119943.6	PYROXD2	1.591602253	0.046287702	0.111474104	0.074454913	0.100687934	0.001091121	0.001608172	24	29	29
ENSG00000119969.10	HELLS	1.591261801	0.042064399	0.11155067	0.11518466	0.127227826	0.000217091	0.000402471	33	33	33
ENSG00000171262.7	FAM98B	-1.590863447	-0.044547936	0.11164031	0.084552418	0.154273471	4.06E-05	9.16E-05	19	23	23
ENSG00000163624.5	CDS1	1.590577141	0.020625853	0.111704772	0.400387815	0.159928425	2.85E-05	6.73E-05	79	90	90
ENSG00000100485.7	SOS2	-1.590375692	-0.045480676	0.111750146	0.07052335	0.158927095	3.04E-05	7.11E-05	23	25	25
ENSG00000114648.7	KLHL18	1.590129345	0.023564382	0.111805653	0.200407812	0.114390364	0.000475491	0.000793748	52	65	65
ENSG00000103222.14	ABCC1	-1.589395766	-0.144272913	0.11197107	0.007950073	0.039925838	0.043011077	0.034476021	5	10	10
ENSG00000132623.11	ANKEF1	1.589108164	0.059333737	0.112035975	0.048463601	0.087320145	0.002442523	0.003178776	11	11	11
ENSG00000102466.11	FGF14	-1.583389229	-0.055181308	0.113332776	0.04746007	0.035362992	0.057142394	0.043226958	19	21	21
ENSG00000100697.10	DICER1	1.582178253	0.030403865	0.113608884	0.134364933	0.059326319	0.013165685	0.01326805	58	60	60
ENSG00000145241.6	CENPC	-1.582157803	-0.036505849	0.113613551	0.096856343	0.099357498	0.001182431	0.001718407	36	36	36
ENSG00000176386.4	CDC26	-1.580543692	-0.041845013	0.113982409	0.080430983	0.156175717	3.61E-05	8.26E-05	37	43	43
ENSG00000111912.14	NCOA7	-1.57959342	-0.41261689	0.114200007	0.001017103	0.03503671	0.05832265	0.043941249	1	1	1
ENSG00000197020.6	ZNF100	1.57934091	0.034053599	0.114257883	0.126524423	0.192397363	3.58E-06	1.07E-05	23	23	23
ENSG00000169946.9	ZFPM2	-1.578721672	-0.026777756	0.114399912	0.211868026	0.170607528	1.45E-05	3.70E-05	72	86	86
ENSG00000100592.11	DAAM1	-1.577087636	-0.041492504	0.114775362	0.082267936	0.161020304	2.66E-05	6.33E-05	33	35	35
ENSG00000111218.7	PRMT8	-1.577003445	-0.053664189	0.114794732	0.045900409	0.095710136	0.001473564	0.002066547	25	28	28
ENSG00000122481.12	RWDD3	-1.57669197	-0.022861351	0.114866419	0.299559717	0.439839772	2.30E-14	4.05E-13	32	32	32
ENSG00000198399.10	ITSN2	-1.575596503	-0.037153721	0.115118823	0.114010786	0.034048993	0.06205357	0.046259539	34	42	42
ENSG00000084731.9	KIF3C	-1.574854966	-0.023228653	0.115289926	0.203399664	0.054079064	0.018087804	0.017222562	35	45	45
ENSG00000149806.6	FAU	-1.573922774	-0.025219259	0.115505304	0.268961501	0.14303705	8.19E-05	0.000171036	55	72	72
ENSG00000134830.3	C5AR2	-1.572203889	-0.020751468	0.115903274	0.363672051	0.107639786	0.000716417	0.001120821	71	103	103
ENSG00000120057.4	SFRP5	1.571670081	0.040238093	0.116027084	0.083089066	0.070518239	0.006707442	0.007496421	27	28	28
ENSG00000117118.5	SDHB	1.571108519	0.043190857	0.116157444	0.062364919	0.129127626	0.000193201	0.000364484	20	22	22
ENSG00000197822.6	OCLN	1.570781774	0.143499566	0.116233347	0.009190792	0.177521308	9.34E-06	2.48E-05	5	13	13
ENSG00000053372.4	MRTO4	-1.570695914	-0.02838835	0.116253299	0.190188181	0.219343814	6.07E-07	2.24E-06	104	110	110
ENSG00000172006.7	ZNF554	1.569184097	0.072542491	0.116605049	0.030259585	0.082876182	0.00319092	0.003992647	21	28	28
ENSG00000103310.6	ZP2	1.568347692	0.063759829	0.116800011	0.035548344	0.150199873	5.24E-05	0.00011534	1	1	1
ENSG00000154153.9	FAM134B	1.568183984	0.034236933	0.116838201	0.118606924	0.275487083	1.26E-08	6.56E-08	24	26	26
ENSG00000196793.9	ZNF239	1.565791744	0.052580355	0.11739738	0.047438449	0.048140682	0.025960695	0.022940425	62	63	63
ENSG00000118689.10	FOXO3	-1.565511733	-0.075373342	0.117462969	0.024675327	0.041894383	0.038084278	0.03129999	7	8	8
ENSG00000124422.7	USP22	1.565471935	0.079829625	0.117472293	0.022403805	0.058060517	0.014212494	0.014165602	19	25	25
ENSG00000072858.6	SIDT1	1.56365966	0.021831632	0.117897516	0.271701086	0.406455407	4.44E-13	6.00E-12	24	26	26
ENSG00000080031.5	PTPRH	1.563324823	0.018722092	0.117976212	0.386307098	0.067990511	0.007809145	0.008491613	78	102	102
ENSG00000196189.8	SEMA4A	-1.559271972	-0.057046452	0.118932022	0.040042422	0.050472061	0.022520671	0.020410494	13	17	17
ENSG00000235169.3	SMIM1	1.558507284	0.531387062	0.119113043	0.000551744	0.03574367	0.055796851	0.042426844	2	2	2
ENSG00000188199.6	NUTM2B	-1.558273654	-0.070903663	0.119168392	0.021322306	0.065819645	0.008899442	0.009499068	5	11	11
ENSG00000162819.7	BROX	1.557788522	0.050300195	0.119283388	0.079935292	0.062635157	0.010782196	0.01117485	41	50	50
ENSG00000163320.6	CGGBP1	-1.55763953	-0.015713781	0.119318723	0.543627845	0.217411268	6.91E-07	2.50E-06	124	150	150
ENSG00000143067.4	ZNF697	-1.555510353	-0.064861897	0.119824571	0.037879054	0.092413744	0.001797463	0.002445442	4	4	4
ENSG00000231500.2	RPS18	1.55524593	0.044447574	0.119887509	0.105188129	0.266002802	2.47E-08	1.21E-07	8	9	9
ENSG00000122958.10	VPS26A	1.553833726	0.038983527	0.120224083	0.093337061	0.032774341	0.067241994	0.049306483	37	44	44
ENSG00000109775.6	UFSP2	1.553357615	0.030844325	0.120337723	0.171970809	0.294351884	3.22E-09	1.87E-08	24	29	29
ENSG00000132975.6	GPR12	1.551599138	0.03772438	0.12075817	0.10150839	0.171424473	1.38E-05	3.54E-05	27	32	32
ENSG00000177570.9	SAMD12	1.549756408	1.011949386	0.121199994	0.00013778	0.117489648	0.000393718	0.000672851	1	1	1
ENSG00000189292.11	FAM150B	1.548596689	0.026913557	0.121478702	0.18524917	0.084398896	0.002911733	0.003699585	57	69	69
ENSG00000005801.12	ZNF195	1.548479909	0.030365515	0.121506795	0.161233554	0.220805343	5.51E-07	2.05E-06	41	46	46
ENSG00000129355.6	CDKN2D	-1.543916907	-0.070237616	0.122608464	0.025345864	0.048484135	0.025422033	0.022537624	17	21	21
ENSG00000169826.6	CSGALNACT2	-1.539608564	-0.040491057	0.123655797	0.087128182	0.198274535	2.44E-06	7.65E-06	15	15	15
ENSG00000249242.3	TMEM150C	-1.538873049	-0.040022187	0.123835292	0.084576548	0.073719442	0.005532986	0.006379328	38	46	46
ENSG00000124243.13	BCAS4	-1.538630889	-0.029884208	0.123894433	0.14591684	0.155963816	3.66E-05	8.36E-05	49	53	53
ENSG00000146054.13	TRIM7	-1.538463735	-0.032812593	0.123935269	0.102317015	0.133591145	0.000146819	0.000287724	10	17	17
ENSG00000161326.8	DUSP14	-1.537623301	-0.061757658	0.124140747	0.035822893	0.033176042	0.065559393	0.048262773	22	25	25
ENSG00000036530.4	CYP46A1	-1.536813391	-0.02632257	0.124339013	0.161362992	0.334704833	1.55E-10	1.20E-09	18	19	19
ENSG00000153233.8	PTPRR	1.535223757	0.041937921	0.124728875	0.082144558	0.057280462	0.014899126	0.014688556	22	24	24
ENSG00000102890.10	ELMO3	-1.535052186	-0.02451793	0.12477101	0.326263129	0.385771151	2.57E-12	2.94E-11	37	42	42
ENSG00000124749.12	COL21A1	1.532277844	0.020670305	0.125453886	0.291876144	0.202749418	1.82E-06	5.92E-06	60	68	68
ENSG00000013573.12	DDX11	1.53183468	0.023665613	0.125563236	0.223845871	0.581699166	7.92E-21	8.00E-19	36	46	46
ENSG00000099203.2	TMED1	1.529794227	0.015296847	0.126067671	0.7940209	0.11530187	0.000449836	0.000757354	144	169	169
ENSG00000157837.11	SPPL3	-1.528670016	-0.023400996	0.126346269	0.261747703	0.122148967	0.000296268	0.000523208	63	72	72
ENSG00000055147.13	FAM114A2	1.528453469	0.90253118	0.126399988	0.000110885	0.051641155	0.020974303	0.019351123	1	1	1
ENSG00000112561.13	TFEB	1.528338762	0.029077242	0.126428451	0.220018692	0.173708111	1.19E-05	3.10E-05	54	59	59
ENSG00000130768.10	SMPDL3B	1.528056354	0.035167714	0.126498547	0.107661999	0.032518521	0.068337179	0.049985207	38	47	47
ENSG00000112110.5	MRPL18	-1.527363071	-0.055583584	0.126670754	0.055651699	0.130821975	0.000174099	0.000332705	16	19	19
ENSG00000177303.5	CASKIN2	-1.524534664	-0.062740853	0.127375205	0.033535625	0.049739103	0.023548923	0.021158086	22	22	22
ENSG00000268358.1	EPB41L4A-AS2	1.523936672	0.972516254	0.127524531	0.000167577	0.033772007	0.063144136	0.046845462	3	3	3
ENSG00000127415.8	IDUA	-1.523283456	-0.062306777	0.127687804	0.034284333	0.083345565	0.003102125	0.003903634	9	9	9
ENSG00000268885.1	AC026740.1	1.52313613	0.223489478	0.127724651	0.002525257	0.044535392	0.03237219	0.027442875	3	9	9
ENSG00000120008.11	WDR11	1.522806659	0.022985815	0.127807083	0.274660728	0.570466772	3.05E-20	2.51E-18	72	74	74
ENSG00000092529.18	CAPN3	-1.522708853	-0.045724222	0.127831562	0.089540497	0.110902107	0.000587779	0.000950053	17	20	20
ENSG00000155666.7	KDM8	-1.522135507	-0.021652063	0.127975131	0.330859511	0.065164226	0.009257795	0.00980758	103	113	113
ENSG00000206562.7	METTL6	-1.521454664	-0.03398585	0.12814578	0.17091406	0.231147327	2.75E-07	1.10E-06	28	30	30
ENSG00000099804.4	CDC34	1.52021973	0.048580046	0.12845576	0.062092049	0.150031999	5.30E-05	0.000116482	15	18	18
ENSG00000163946.9	FAM208A	1.516517671	0.035249	0.129388505	0.105068457	0.18122959	7.36E-06	2.01E-05	32	36	36
ENSG00000167700.4	MFSD3	-1.516460252	-0.06214693	0.129403014	0.032912185	0.036927571	0.051819552	0.040083275	11	14	14
ENSG00000164366.3	CCDC127	1.516092854	0.028960884	0.129495875	0.157997091	0.293641965	3.40E-09	1.96E-08	40	41	41
ENSG00000123329.13	ARHGAP9	1.514532408	0.079216578	0.129890861	0.023289295	0.033359697	0.06480492	0.047826797	7	8	8
ENSG00000177888.7	ZBTB41	1.51359855	0.04116548	0.130127689	0.080496727	0.121483881	0.000308557	0.000542203	24	28	28
ENSG00000071539.9	TRIP13	-1.51126828	-0.101204069	0.130720112	0.01300363	0.052229809	0.020237038	0.018826963	2	2	2
ENSG00000155760.1	FZD7	1.510385161	0.060694571	0.130945173	0.03136887	0.125732796	0.000237925	0.000433597	18	20	20
ENSG00000121900.14	TMEM54	-1.509832245	-0.043402364	0.131086235	0.075127622	0.058064664	0.01420893	0.014165602	26	31	31
ENSG00000138346.10	DNA2	1.508701161	0.019362459	0.131375169	0.404033179	0.566524136	4.85E-20	3.53E-18	44	49	49
ENSG00000153879.4	CEBPG	-1.50864116	-0.013930912	0.13139051	0.771653365	0.153709528	4.21E-05	9.44E-05	148	166	166
ENSG00000119723.11	COQ6	1.508207916	0.041866544	0.131501322	0.079138144	0.196832061	2.68E-06	8.34E-06	27	29	29
ENSG00000143195.8	ILDR2	1.506400185	0.054923749	0.131964473	0.065569871	0.146008565	6.81E-05	0.000145415	38	42	42
ENSG00000123992.14	DNPEP	1.506013496	0.049904775	0.132063709	0.122660321	0.034423866	0.060608949	0.045393069	34	36	36
ENSG00000197417.7	SHPK	1.505654548	0.035760781	0.132155878	0.094824851	0.269155033	1.98E-08	9.89E-08	3	3	3
ENSG00000141759.10	TXNL4A	1.505292082	0.101791823	0.132249	0.018889905	0.0479831	0.02621173	0.023119792	12	21	21
ENSG00000166004.10	KIAA1731	1.504436017	0.053484719	0.132469136	0.05922333	0.053989119	0.018186767	0.017297451	32	36	36
ENSG00000197457.5	STMN3	-1.504032418	-0.02996804	0.13257302	0.139425798	0.259092788	4.02E-08	1.88E-07	28	38	38
ENSG00000151414.10	NEK7	-1.50338034	-0.045737411	0.132740993	0.065461462	0.046124887	0.029366218	0.025354369	44	52	52
ENSG00000157870.10	FAM213B	-1.500814632	-0.060825544	0.133403513	0.042140286	0.070951349	0.006534976	0.007331466	35	41	41
ENSG00000186088.11	GSAP	1.500533878	0.018502695	0.133476165	0.341506992	0.435880909	3.30E-14	5.69E-13	48	60	60
ENSG00000205581.6	HMGN1	-1.500451299	-0.022968406	0.13349754	0.199287626	0.164955958	2.08E-05	5.09E-05	50	58	58
ENSG00000143799.8	PARP1	1.500046468	0.069305401	0.133602366	0.029870688	0.049062262	0.024540956	0.021910271	10	13	13
ENSG00000143751.9	SDE2	1.499816034	0.024387183	0.133662063	0.261992072	0.12459225	0.000255139	0.000459989	62	70	70
ENSG00000149474.9	CSRP2BP	1.498870419	0.025918603	0.133907252	0.189602977	0.095422783	0.001499322	0.00209626	68	70	70
ENSG00000198467.9	TPM2	-1.497828996	-0.017790787	0.134177685	0.483924792	0.560439172	9.85E-20	6.22E-18	46	49	49
ENSG00000144455.9	SUMF1	1.497265058	0.036419889	0.134324303	0.110141118	0.250888501	7.11E-08	3.17E-07	16	17	17
ENSG00000131626.11	PPFIA1	-1.495405614	-0.03463844	0.134808616	0.134500098	0.36530216	1.38E-11	1.36E-10	32	39	39
ENSG00000127366.4	TAS2R5	1.495167306	0.06785143	0.134870784	0.026788894	0.04108503	0.040035269	0.03255549	13	16	16
ENSG00000258405.5	ZNF578	-1.492130733	-0.059677343	0.135664877	0.03380571	0.128998476	0.000194739	0.000366604	24	30	30
ENSG00000101460.8	MAP1LC3A	1.491848857	0.025860113	0.135738773	0.180355542	0.390333794	1.75E-12	2.08E-11	16	20	20
ENSG00000140986.7	RPL3L	1.491234303	0.100258707	0.135899991	0.008574521	0.035073153	0.058189573	0.043878369	1	2	2
ENSG00000006432.11	MAP3K9	-1.490424136	-0.027940671	0.13611275	0.137390699	0.232442639	2.52E-07	1.01E-06	27	33	33
ENSG00000168955.3	TM4SF20	1.488033448	0.02679701	0.136742073	0.187457356	0.047265109	0.027387317	0.02399725	52	56	56
ENSG00000157353.12	FUK	-1.487056136	-1.049413697	0.136999985	0.000121966	0.062214969	0.011058934	0.011418174	1	1	1
ENSG00000197362.9	ZNF786	1.485843774	0.031448226	0.137320449	0.125817462	0.336982445	1.30E-10	1.04E-09	25	30	30
ENSG00000167434.5	CA4	-1.485505261	-0.019922482	0.137410031	0.303858631	0.094497317	0.001585361	0.002197499	66	87	87
ENSG00000166828.2	SCNN1G	1.482743795	0.022598971	0.138142494	0.234160816	0.274780567	1.33E-08	6.87E-08	31	37	37
ENSG00000074266.13	EED	1.482681361	0.027648069	0.138159089	0.131762407	0.121942647	0.000300027	0.000529055	36	42	42
ENSG00000114784.3	EIF1B	-1.48170498	-0.052189685	0.138418812	0.042235921	0.055181077	0.016918733	0.016284756	32	36	36
ENSG00000131446.11	MGAT1	1.481417369	0.054898259	0.138495389	0.047543652	0.16453286	2.13E-05	5.19E-05	5	7	7
ENSG00000198624.8	CCDC69	-1.480620554	-0.052863196	0.138707715	0.035131535	0.048721682	0.025056163	0.022252305	9	11	11
ENSG00000158747.9	NBL1	-1.479687373	-0.079386009	0.138956697	0.021725692	0.162525488	2.42E-05	5.79E-05	6	7	7
ENSG00000177694.10	NAALADL2	-1.477919447	-0.0564908	0.13942934	0.045296724	0.059391755	0.01311374	0.013223235	18	19	19
ENSG00000112031.11	MTRF1L	1.47690089	0.031249169	0.139702206	0.131013381	0.294046981	3.30E-09	1.91E-08	24	25	25
ENSG00000054983.12	GALC	-1.475143821	-0.042603538	0.140173881	0.074090852	0.147400546	6.24E-05	0.000134814	121	124	124
ENSG00000196774.3	ANKRD20A1	1.474674821	0.257487513	0.140299989	0.005808654	0.036060409	0.054702533	0.041765326	1	26	26
ENSG00000105612.4	DNASE2	1.473920584	0.067869848	0.140502975	0.028229039	0.036093005	0.054591192	0.041698318	15	17	17
ENSG00000133561.11	GIMAP6	1.473329116	0.090446529	0.140662313	0.024894632	0.067185207	0.008196989	0.008853476	18	30	30
ENSG00000185689.11	C6orf201	1.47252321	0.05253077	0.140879644	0.056357644	0.143020303	8.20E-05	0.000171036	12	13	13
ENSG00000183172.8	SMDT1	-1.472319743	-0.025021072	0.140934554	0.214560312	0.509796819	2.54E-17	8.40E-16	35	39	39
ENSG00000144488.10	ESPNL	-1.47166381	-0.015723092	0.141111685	0.670787697	0.539998261	9.96E-19	4.70E-17	112	123	123
ENSG00000077312.4	SNRPA	-1.47152136	-0.020029313	0.141150175	0.295608923	0.054815541	0.017297763	0.016613417	76	95	95
ENSG00000134070.4	IRAK2	1.470829776	0.040068747	0.141337158	0.076235336	0.087670117	0.002391626	0.003125185	24	26	26
ENSG00000129460.11	NGDN	1.470258538	0.043018433	0.141491746	0.088156074	0.085002708	0.002807896	0.00358439	23	27	27
ENSG00000168411.9	RFWD3	-1.469999704	-0.033852088	0.141561834	0.101864507	0.202759191	1.82E-06	5.92E-06	16	18	18
ENSG00000169857.3	AVEN	1.469808713	0.06124438	0.141613569	0.028644181	0.036454461	0.053372276	0.041005755	18	18	18
ENSG00000137449.11	CPEB2	-1.469287466	-0.048866139	0.141754835	0.037686429	0.05993993	0.012686627	0.012869582	2	2	2
ENSG00000138381.5	ASNSD1	-1.468780976	-0.027958299	0.141892206	0.168469319	0.323313979	3.72E-10	2.65E-09	14	15	15
ENSG00000013306.11	SLC25A39	1.468017045	0.01866845	0.142099593	0.34606649	0.302139461	1.82E-09	1.10E-08	69	80	80
ENSG00000142661.14	MYOM3	-1.467922322	-0.041908663	0.142125324	0.070499377	0.171007338	1.41E-05	3.62E-05	11	12	12
ENSG00000086189.5	DIMT1	1.467023268	0.033098656	0.142369726	0.107797959	0.068695765	0.007484657	0.008206884	80	89	89
ENSG00000100243.16	CYB5R3	1.466617865	0.056911261	0.142480037	0.037995353	0.06308748	0.010492089	0.010925584	18	23	23
ENSG00000005379.11	BZRAP1	1.465766991	0.030483596	0.142711776	0.143928221	0.195574539	2.91E-06	8.94E-06	20	22	22
ENSG00000168488.14	ATXN2L	-1.464683269	-0.074269936	0.143007352	0.028901784	0.051440497	0.021231818	0.019522514	7	9	9
ENSG00000154175.12	ABI3BP	1.462988331	0.042520116	0.143470572	0.06932009	0.105015216	0.000839872	0.001283474	25	28	28
ENSG00000070886.6	EPHA8	-1.462955939	-0.027703595	0.143479436	0.159045919	0.042872244	0.035857185	0.029886259	42	46	46
ENSG00000100504.12	PYGL	1.462864742	0.067667673	0.143504393	0.028813931	0.047980455	0.026215965	0.023119792	8	9	9
ENSG00000121577.9	POPDC2	-1.46263718	-0.020646072	0.143566684	0.279478565	0.072438172	0.005976052	0.00681245	87	90	90
ENSG00000104671.3	DCTN6	-1.460812788	-0.045712632	0.144066825	0.102828103	0.079735463	0.003854011	0.00467676	37	43	43
ENSG00000172803.13	SNX32	1.460280165	0.020497339	0.144213091	0.273191451	0.522660147	6.56E-18	2.49E-16	14	17	17
ENSG00000169220.13	RGS14	1.4597505	0.041856126	0.144358657	0.075672813	0.208913956	1.21E-06	4.15E-06	20	26	26
ENSG00000141401.7	IMPA2	1.459126274	0.069860578	0.144530356	0.041938596	0.054718376	0.017399956	0.016693437	23	29	29
ENSG00000142677.3	IL22RA1	-1.457737897	-0.02530017	0.144912802	0.183703215	0.329970457	2.23E-10	1.67E-09	12	12	12
ENSG00000104774.8	MAN2B1	-1.457416335	-0.033135377	0.145001491	0.098724046	0.03620474	0.054211326	0.041470851	39	51	51
ENSG00000171714.10	ANO5	-1.456657347	-0.027223268	0.145210989	0.151620687	0.210141325	1.12E-06	3.88E-06	41	45	45
ENSG00000126001.11	CEP250	-1.456351668	-0.025807486	0.145295429	0.181130966	0.258035792	4.32E-08	2.01E-07	34	43	43
ENSG00000115526.6	CHST10	1.456225799	0.050162378	0.14533021	0.052498137	0.132895153	0.000153249	0.000298342	5	6	6
ENSG00000196754.6	S100A2	1.456101108	0.021454835	0.145364671	0.302119124	0.276975814	1.13E-08	5.96E-08	54	65	65
ENSG00000159267.10	HLCS	-1.455215929	-0.019194465	0.145609492	0.263337862	0.337178321	1.28E-10	1.02E-09	93	95	95
ENSG00000149115.9	TNKS1BP1	-1.455138579	-0.066329695	0.145630901	0.032514729	0.039396828	0.044444277	0.035392239	13	16	16
ENSG00000119844.10	AFTPH	1.454902022	0.037540638	0.145696388	0.123423009	0.174826468	1.11E-05	2.91E-05	22	25	25
ENSG00000187097.8	ENTPD5	1.45404863	0.031540302	0.145932824	0.144478116	0.272709735	1.54E-08	7.82E-08	27	31	31
ENSG00000184076.10	UQCR10	-1.453037941	-0.075122585	0.14621322	0.02074419	0.052742727	0.019616136	0.018400418	5	5	5
ENSG00000072274.8	TFRC	-1.449847608	-0.050378133	0.14710102	0.048010329	0.083677398	0.003040842	0.003837439	18	25	25
ENSG00000085662.9	AKR1B1	1.44784559	0.033795374	0.147660239	0.108423403	0.097277097	0.001340654	0.00191144	31	36	36
ENSG00000183513.4	COA5	1.446275702	0.510902969	0.148099888	0.000483976	0.049077893	0.02451757	0.021900447	2	2	2
ENSG00000105146.8	AURKC	1.446236667	0.110113132	0.148110833	0.009976443	0.041971726	0.037903046	0.03119453	15	16	16
ENSG00000123607.10	TTC21B	1.446081653	0.037295328	0.148154301	0.089503925	0.078612849	0.004123043	0.004948196	22	25	25
ENSG00000164403.10	SHROOM1	-1.44566934	-0.049477375	0.148269968	0.047850413	0.064690285	0.009525939	0.010061515	16	20	20
ENSG00000163599.10	CTLA4	1.445599461	1.043767504	0.148289578	0.000142269	0.039156551	0.045111486	0.035786597	12	13	13
ENSG00000105447.8	GRWD1	-1.442974399	-0.040412253	0.149027683	0.069369254	0.108280639	0.000689117	0.001087246	15	18	18
ENSG00000170412.12	GPRC5C	1.442917771	0.054632706	0.149043636	0.045831755	0.080477275	0.003685935	0.004516707	15	16	16
ENSG00000145194.13	ECE2	1.442287604	0.048537199	0.149221256	0.050249487	0.057128948	0.015036339	0.014799082	27	30	30
ENSG00000205097.2	FRG2	1.441903964	0.112056492	0.149329468	0.010033755	0.078764484	0.004085635	0.004914002	9	16	16
ENSG00000070669.12	ASNS	1.441529271	0.038650897	0.149435214	0.065953034	0.088322234	0.002299592	0.003025037	31	38	38
ENSG00000197114.7	ZGPAT	-1.441354438	-0.037304213	0.149484575	0.071859468	0.061226078	0.011738828	0.012021901	19	23	23
ENSG00000163798.9	SLC4A1AP	-1.440118834	-0.017728538	0.149833781	0.316582125	0.100033873	0.0011351	0.001659671	58	67	67
ENSG00000104979.4	C19orf53	1.439512612	0.02575244	0.150005339	0.199014614	0.072327957	0.006015786	0.006844511	60	70	70
ENSG00000172428.6	MYEOV2	-1.439290309	-0.064067861	0.150068287	0.025632052	0.064266269	0.009772458	0.010285042	10	15	15
ENSG00000166529.10	ZSCAN21	-1.438615861	-0.028877772	0.15025939	0.122725056	0.132632371	0.000155749	0.000302542	38	44	44
ENSG00000127483.13	HP1BP3	1.437827552	0.032670217	0.15048299	0.114037569	0.059251827	0.013225074	0.013305156	44	48	48
ENSG00000172922.4	RNASEH2C	-1.437728835	-0.030167464	0.150511008	0.139469686	0.144907587	7.29E-05	0.000154272	26	30	30
ENSG00000137337.10	MDC1	1.437658967	0.041173545	0.150530841	0.054143718	0.034548617	0.060136057	0.045066175	20	26	26
ENSG00000162434.7	JAK1	-1.436751138	-0.018459791	0.150788719	0.429254389	0.518743898	9.94E-18	3.66E-16	48	48	48
ENSG00000115902.6	SLC1A4	1.435978491	0.036489292	0.151008462	0.119512438	0.098229179	0.00126579	0.00181863	39	41	41
ENSG00000165995.14	CACNB2	1.435310408	0.065262487	0.151198663	0.019459136	0.03516751	0.057846479	0.043666199	7	7	7
ENSG00000081760.12	AACS	-1.43433473	-0.262152831	0.151476764	0.001788683	0.033893845	0.06266197	0.046595419	2	4	4
ENSG00000163933.5	RFT1	1.433474834	0.016712932	0.151722186	0.402546158	0.636140919	6.63E-24	1.38E-21	44	47	47
ENSG00000204642.9	HLA-F	-1.432190485	-0.025240321	0.152089314	0.226106657	0.383937695	2.99E-12	3.38E-11	41	65	65
ENSG00000141959.12	PFKL	1.432051432	0.020796159	0.152129103	0.24632295	0.24021814	1.48E-07	6.21E-07	46	54	54
ENSG00000164989.11	CCDC171	1.431574709	0.023360858	0.152265572	0.224954843	0.296208656	2.81E-09	1.65E-08	48	56	56
ENSG00000186907.3	RTN4RL2	1.429763506	0.024642362	0.152784906	0.19393111	0.322225584	4.04E-10	2.84E-09	21	22	22
ENSG00000120071.8	KANSL1	-1.429371182	-0.02785407	0.152897577	0.163496083	0.24387551	1.15E-07	4.95E-07	29	36	36
ENSG00000205853.6	RFPL3S	1.428919976	0.027694126	0.153027235	0.13356179	0.131612651	0.000165835	0.000318809	43	45	45
ENSG00000122515.10	ZMIZ2	-1.428156471	-0.026501737	0.153246826	0.181779787	0.083669363	0.003042312	0.003837924	56	70	70
ENSG00000113273.11	ARSB	-1.427742934	-0.119084252	0.153365864	0.0091879	0.043384556	0.034744365	0.02912344	6	7	7
ENSG00000170801.5	HTRA3	-1.427720936	-0.022562913	0.153372198	0.264860966	0.08394562	0.002992191	0.003786851	73	110	110
ENSG00000148843.9	PDCD11	-1.42715992	-0.04065158	0.153533804	0.085172522	0.085865974	0.002665824	0.003427769	25	27	27
ENSG00000161265.10	U2AF1L4	-1.42627098	-0.021994219	0.153790138	0.218633555	0.447806942	1.11E-14	2.04E-13	27	30	30
ENSG00000163885.7	CCDC37	1.425839279	0.028356018	0.15391474	0.130364042	0.188279025	4.67E-06	1.35E-05	37	41	41
ENSG00000236939.2	C8orf56	1.42552761	0.06584363	0.154004745	0.025675174	0.042915937	0.035760863	0.029848175	26	29	29
ENSG00000179772.6	FOXS1	-1.425473162	-0.118394281	0.154020473	0.008779505	0.034006992	0.062217658	0.046362321	7	8	8
ENSG00000177084.12	POLE	1.423644741	0.018492444	0.154549337	0.317982963	0.703888441	1.91E-28	1.35E-25	34	54	54
ENSG00000120451.6	SNX19	1.423625868	0.020827791	0.154554804	0.270868631	0.355904129	2.94E-11	2.70E-10	62	66	66
ENSG00000164344.11	KLKB1	-1.423391887	-0.028293644	0.154622583	0.117779125	0.208738836	1.23E-06	4.18E-06	23	30	30
ENSG00000137216.14	TMEM63B	-1.423250026	-0.033581971	0.154663688	0.104988066	0.233905227	2.28E-07	9.29E-07	13	14	14
ENSG00000055483.15	USP36	-1.42321435	-0.024725511	0.154674027	0.246468938	0.203627501	1.72E-06	5.64E-06	43	52	52
ENSG00000122643.14	NT5C3A	1.423202888	0.036554812	0.154677349	0.072891341	0.186046595	5.40E-06	1.53E-05	12	14	14
ENSG00000175315.2	CST6	1.422489653	0.024304063	0.154884153	0.187140665	0.306401733	1.33E-09	8.28E-09	16	18	18
ENSG00000148672.7	GLUD1	-1.422032158	-0.040306514	0.155016916	0.068882303	0.142591209	8.42E-05	0.000174838	20	20	20
ENSG00000126267.4	COX6B1	1.421624128	0.046334935	0.155135396	0.060729561	0.239414139	1.57E-07	6.54E-07	23	30	30
ENSG00000111358.9	GTF2H3	-1.42020343	-0.030179995	0.155548465	0.08730878	0.132449804	0.000157509	0.00030529	20	21	21
ENSG00000172889.11	EGFL7	1.418332107	0.024672067	0.156093827	0.176108227	0.094892013	0.001548082	0.002155064	56	63	63
ENSG00000134575.5	ACP2	-1.418108539	-0.033020378	0.156159079	0.08436364	0.098636836	0.00123502	0.001783156	15	21	21
ENSG00000114529.8	C3orf52	-1.418092203	-0.023819387	0.156163847	0.196341152	0.321694399	4.20E-10	2.94E-09	25	31	31
ENSG00000066405.8	CLDN18	1.417540708	0.041465795	0.156324901	0.085118477	0.098369972	0.001255078	0.00180696	39	41	41
ENSG00000146828.13	SLC12A9	1.417516386	0.038071004	0.156332007	0.064783849	0.049259975	0.02424684	0.021685998	23	26	26
ENSG00000171763.13	SPATA5L1	-1.415379122	-0.075344673	0.156957368	0.017570456	0.041089581	0.040024015	0.03255549	45	45	45
ENSG00000126432.9	PRDX5	-1.413578856	-0.024448225	0.157485593	0.146128954	0.216566708	7.31E-07	2.63E-06	40	43	43
ENSG00000184786.4	TCTE3	-1.41327697	-0.04175063	0.157574303	0.067081825	0.034816096	0.059135103	0.044468122	34	43	43
ENSG00000134201.6	GSTM5	1.412442268	0.021078812	0.157819778	0.187010308	0.338329502	1.17E-10	9.48E-10	12	16	16
ENSG00000051596.5	THOC3	1.412324395	0.019402512	0.157854467	0.358243029	0.339788326	1.05E-10	8.58E-10	77	95	95
ENSG00000188818.8	ZDHHC11	-1.411628167	-0.090068075	0.158059474	0.01554695	0.069865801	0.006975906	0.007732493	8	15	15
ENSG00000130714.11	POMT1	-1.410936948	-0.024909237	0.158263207	0.175514311	0.218196729	6.56E-07	2.38E-06	38	40	40
ENSG00000196150.9	ZNF250	1.409101638	0.059204667	0.158805116	0.035556795	0.063364905	0.010318062	0.010772723	9	15	15
ENSG00000143167.7	GPA33	1.409055877	0.043378639	0.158818646	0.061679964	0.057156353	0.015011427	0.014778675	23	23	23
ENSG00000080166.11	DCT	1.40847609	0.018897637	0.158990142	0.345319106	0.506416783	3.61E-17	1.15E-15	67	68	68
ENSG00000153317.10	ASAP1	-1.408409018	-0.031220498	0.15900999	0.101734256	0.124224044	0.000260954	0.00046904	21	22	22
ENSG00000159905.10	ZNF221	-1.407630527	-0.042679204	0.159240503	0.057818977	0.069922284	0.006952245	0.007723653	30	41	41
ENSG00000145416.9	Mar-01	1.407424971	0.029186046	0.159301411	0.119769245	0.205719056	1.50E-06	5.01E-06	24	24	24
ENSG00000172380.5	GNG12	-1.405576105	-0.061367229	0.159850036	0.030791459	0.064395875	0.009696432	0.010217188	20	22	22
ENSG00000141279.11	NPEPPS	-1.405309825	-0.036234655	0.159929168	0.083439638	0.039584285	0.043930843	0.035038592	38	41	41
ENSG00000133316.11	WDR74	-1.402942171	-0.032572646	0.160634084	0.104082436	0.053523894	0.018707485	0.017674629	25	36	36
ENSG00000027001.7	MIPEP	1.402837642	0.022910559	0.160665259	0.251361506	0.300228589	2.09E-09	1.25E-08	54	67	67
ENSG00000129048.6	ACKR4	-1.40266279	-0.036374664	0.160717418	0.107510638	0.128429239	0.000201665	0.000377632	27	29	29
ENSG00000158186.8	MRAS	1.402410444	0.039981116	0.160792716	0.074552148	0.03383509	0.062894006	0.046718685	34	39	39
ENSG00000178342.4	KCNG2	1.401716232	1.074418903	0.161000001	0.000132512	0.096976521	0.00136519	0.001936886	1	1	1
ENSG00000042088.9	TDP1	-1.401086136	-0.021806677	0.161188317	0.230163704	0.096048447	0.001443802	0.002027451	58	61	61
ENSG00000066084.8	DIP2B	-1.401010389	-0.045520031	0.161210966	0.043415947	0.068081471	0.007766513	0.008458256	8	9	9
ENSG00000005981.8	ASB4	-1.400539384	-0.030065231	0.161351858	0.128556076	0.081784201	0.003407435	0.004236587	34	38	38
ENSG00000152672.3	CLEC4F	-1.399848383	-0.045145996	0.161558726	0.057540357	0.0428869	0.035824846	0.029880427	24	26	26
ENSG00000103496.10	STX4	-1.399324831	-0.049834029	0.161715597	0.053698944	0.122465739	0.000290586	0.000514974	11	12	12
ENSG00000204463.8	BAG6	-1.398735477	-0.028074228	0.161892321	0.143840302	0.304630981	1.51E-09	9.29E-09	40	57	57
ENSG00000235750.5	KIAA0040	1.398032055	0.048993736	0.162103441	0.044408375	0.105421986	0.000819441	0.00125862	33	38	38
ENSG00000135314.8	KHDC1	-1.397373646	-0.07181323	0.16230124	0.034393562	0.046911062	0.027986725	0.024413608	14	15	15
ENSG00000197841.10	ZNF181	-1.397269446	-0.062123564	0.16233256	0.029115505	0.046515689	0.028671988	0.024906657	15	16	16
ENSG00000187068.2	C3orf70	-1.397085575	-0.030101815	0.162387839	0.0929587	0.123697915	0.000269493	0.000482182	34	36	36
ENSG00000145476.11	CYP4V2	-1.396303572	-0.024309266	0.162623099	0.213311332	0.309689297	1.04E-09	6.58E-09	24	29	29
ENSG00000175518.6	UBQLNL	1.395260716	0.072873935	0.162937234	0.022594687	0.085354668	0.002749083	0.003519473	2	4	4
ENSG00000171148.9	TADA3	1.394477798	0.045465695	0.16317337	0.064029493	0.044555515	0.032332225	0.027419917	30	32	32
ENSG00000157851.12	DPYSL5	-1.392937421	-0.034282577	0.163638715	0.091277419	0.198874817	2.35E-06	7.40E-06	9	9	9
ENSG00000165480.11	SKA3	-1.392786547	-0.309100705	0.163684348	0.001018242	0.039479564	0.044216904	0.035234972	16	17	17
ENSG00000189171.9	S100A13	-1.390666072	-0.045712431	0.16432671	0.058223995	0.089122087	0.002191511	0.002903375	8	13	13
ENSG00000169507.5	SLC38A11	-1.39066099	-0.049680742	0.164328252	0.04465348	0.038596049	0.046708578	0.036826583	29	30	30
ENSG00000241973.6	PI4KA	-1.389697488	-0.037575798	0.164620758	0.096480636	0.185422914	5.62E-06	1.59E-05	35	51	51
ENSG00000100379.13	KCTD17	-1.389371377	-0.021421827	0.164719849	0.264120319	0.22263108	4.87E-07	1.84E-06	63	68	68
ENSG00000131370.11	SH3BP5	1.38744465	0.025526872	0.165306218	0.178183509	0.121381212	0.000310498	0.000545073	73	82	82
ENSG00000109686.12	SH3D19	-1.387064839	-0.03241049	0.165421993	0.0962269	0.24105889	1.40E-07	5.91E-07	22	25	25
ENSG00000167208.10	SNX20	-1.387022844	-0.022185565	0.165434797	0.188297482	0.043291995	0.034942759	0.029255075	45	52	52
ENSG00000092068.14	SLC7A8	1.386720821	0.020587075	0.165526909	0.293599984	0.414233338	2.26E-13	3.36E-12	27	31	31
ENSG00000112130.12	RNF8	1.386447223	0.039850572	0.165610385	0.078294768	0.156953675	3.44E-05	7.92E-05	6	7	7
ENSG00000129946.6	SHC2	1.38615985	0.038601809	0.165698098	0.069490337	0.109864449	0.000625992	0.001003769	18	24	24
ENSG00000108255.3	CRYBA1	1.385053095	0.052293626	0.166036233	0.039344475	0.046409581	0.028858802	0.025007832	17	17	17
ENSG00000138771.10	SHROOM3	1.384078826	0.020505674	0.16633432	0.270893437	0.428908802	6.18E-14	1.01E-12	28	28	28
ENSG00000145741.11	BTF3	-1.38380181	-0.061129719	0.166419149	0.042779226	0.109192432	0.000652044	0.001038014	8	8	8
ENSG00000128596.12	CCDC136	-1.381799683	-0.024492214	0.167033217	0.242624115	0.244755464	1.09E-07	4.68E-07	37	40	40
ENSG00000108852.10	MPP2	1.381503791	0.060721941	0.167124113	0.030039206	0.040397911	0.041772519	0.033658665	15	17	17
ENSG00000101546.8	RBFA	-1.380497053	-0.083142456	0.167433656	0.020663088	0.055353116	0.016743269	0.01615543	9	9	9
ENSG00000104835.10	SARS2	1.380323312	0.041083698	0.16748712	0.071201954	0.054207739	0.017947176	0.017134785	37	44	44
ENSG00000139190.12	VAMP1	-1.380106651	-0.022427581	0.16755381	0.182354816	0.292185711	3.78E-09	2.16E-08	20	24	24
ENSG00000180155.14	LYNX1	1.37941036	0.051394199	0.167768267	0.043747445	0.051048076	0.021744774	0.019890764	23	29	29
ENSG00000145287.6	PLAC8	1.378543224	0.041640037	0.168035632	0.056366163	0.107695485	0.000714002	0.001118032	14	14	14
ENSG00000171574.13	ZNF584	1.378247865	0.045478567	0.168126774	0.057358115	0.143588169	7.91E-05	0.000166007	13	18	18
ENSG00000189283.5	FHIT	-1.377868376	-0.048608535	0.16824393	0.046161643	0.084399257	0.002911669	0.003699585	10	11	11
ENSG00000187098.10	MITF	1.376625586	0.019063359	0.168628036	0.270626938	0.194392686	3.14E-06	9.56E-06	60	72	72
ENSG00000128944.9	KNSTRN	-1.375752108	-0.021618904	0.168898393	0.154174754	0.301427135	1.92E-09	1.15E-08	27	28	28
ENSG00000103351.8	CLUAP1	-1.371980754	-0.021689655	0.170069429	0.227833633	0.139961657	9.91E-05	0.000202917	53	61	61
ENSG00000149150.4	SLC43A1	1.371001204	0.02465172	0.170374581	0.164861018	0.195187008	2.99E-06	9.15E-06	22	27	27
ENSG00000153443.8	UBALD1	1.370997598	0.014140857	0.170375705	0.56299318	0.177829113	9.15E-06	2.45E-05	109	121	121
ENSG00000188269.4	OR7A5	-1.370721612	-0.028545345	0.170461755	0.118409732	0.079753465	0.003849843	0.004673305	33	37	37
ENSG00000048649.9	RSF1	-1.370542165	-0.036930657	0.170517723	0.082467631	0.086322655	0.002593588	0.003349498	28	32	32
ENSG00000059122.12	FLYWCH1	1.370298994	0.017890804	0.170593587	0.357701945	0.612847287	1.55E-22	2.38E-20	15	19	19
ENSG00000132507.13	EIF5A	1.37029051	0.02715617	0.170596234	0.164279685	0.243765894	1.16E-07	4.98E-07	34	42	42
ENSG00000259363.1	CTD-2054N24.2	-1.369658139	-0.03938116	0.170793642	0.072646416	0.103123217	0.000941749	0.001416343	19	25	25
ENSG00000137877.8	SPTBN5	1.369453393	0.027903549	0.170857594	0.12582371	0.277080937	1.12E-08	5.92E-08	9	9	9
ENSG00000203908.3	KHDC3L	1.369049495	0.023758382	0.170983804	0.247751776	0.310499205	9.77E-10	6.28E-09	57	69	69
ENSG00000133114.13	GPALPP1	-1.366395482	-0.049842866	0.171814866	0.059941455	0.0724941	0.00595599	0.006800538	28	30	30
ENSG00000197372.5	ZNF675	1.366196024	0.042447298	0.171877445	0.061504848	0.03427279	0.061186852	0.045719408	29	34	34
ENSG00000135541.16	AHI1	-1.366141276	-0.020095226	0.171894625	0.282487683	0.468799334	1.53E-15	3.42E-14	24	27	27
ENSG00000132313.10	MRPL35	-1.365881868	-0.020772225	0.171976045	0.235522039	0.097169671	0.001349372	0.001919229	65	82	82
ENSG00000132681.12	ATP1A4	1.365047541	0.022105476	0.172238108	0.163874924	0.344197142	7.41E-11	6.25E-10	13	14	14
ENSG00000180481.6	GLIPR1L2	1.364633298	0.018102112	0.172368334	0.355407181	0.596745132	1.23E-21	1.55E-19	19	22	22
ENSG00000187166.1	H1FNT	1.364280037	0.024846905	0.172479446	0.142602576	0.242088773	1.30E-07	5.54E-07	34	40	40
ENSG00000242485.1	MRPL20	1.362691073	0.062054802	0.172979892	0.048256008	0.092611954	0.001776127	0.00242107	17	24	24
ENSG00000138769.6	CDKL2	-1.362575654	-0.060570051	0.173016286	0.028192592	0.058135901	0.014147858	0.01410913	14	18	18
ENSG00000186818.8	LILRB4	-1.362088896	-0.017829402	0.173169832	0.2880321	0.051710672	0.020885832	0.019304744	79	118	118
ENSG00000101216.6	GMEB2	-1.360744105	-0.026227803	0.173594571	0.14049923	0.189289762	4.38E-06	1.27E-05	38	47	47
ENSG00000061273.13	HDAC7	-1.360655533	-0.065846773	0.173622573	0.020113754	0.037510927	0.049969521	0.038933198	9	10	10
ENSG00000243317.3	C7orf73	-1.359356336	-0.023460446	0.1740337	0.194101869	0.255083114	5.31E-08	2.43E-07	33	37	37
ENSG00000267795.1	SMIM22	1.35915348	0.024660824	0.174097959	0.162520211	0.269566185	1.92E-08	9.65E-08	18	18	18
ENSG00000142459.4	EVI5L	1.358749565	0.015366461	0.17422596	0.4462295	0.243319836	1.20E-07	5.12E-07	93	119	119
ENSG00000109501.9	WFS1	-1.358176316	-0.021856543	0.174407744	0.224886034	0.372382727	7.76E-12	8.00E-11	36	38	38
ENSG00000146830.9	GIGYF1	1.357516711	0.02979866	0.174617087	0.116478556	0.074911019	0.005150516	0.005996995	33	39	39
ENSG00000086619.9	ERO1LB	1.356943513	0.050108663	0.17479916	0.047498033	0.04525142	0.03098083	0.026464188	16	18	18
ENSG00000168899.4	VAMP5	-1.356920852	-0.053039036	0.17480636	0.031646246	0.051327863	0.021377775	0.019621018	7	9	9
ENSG00000165269.8	AQP7	-1.35572501	-0.038148581	0.175186679	0.086249498	0.117930634	0.000383276	0.000657178	25	33	33
ENSG00000166900.10	STX3	1.354960558	0.019354291	0.175430124	0.292236537	0.071675808	0.006256378	0.007077271	87	110	110
ENSG00000171453.13	POLR1C	1.352803543	0.047016473	0.176118401	0.060807386	0.061131962	0.011805694	0.012079887	16	17	17
ENSG00000167637.12	ZNF283	-1.35267302	-0.029037054	0.176160113	0.119435596	0.193483459	3.34E-06	1.01E-05	31	32	32
ENSG00000221983.3	UBA52	-1.352054619	-0.014465593	0.176357843	0.393913978	0.099304069	0.001186252	0.001721838	77	95	95
ENSG00000124145.5	SDC4	-1.350761386	-0.041111488	0.176771881	0.062368961	0.12051593	0.000327349	0.000571252	30	33	33
ENSG00000164199.11	GPR98	-1.350140392	-0.029127338	0.176970954	0.144552347	0.289813957	4.49E-09	2.55E-08	14	15	15
ENSG00000034239.6	EFCAB1	1.349995159	0.022931247	0.177017536	0.184134676	0.229289763	3.11E-07	1.23E-06	18	21	21
ENSG00000181031.11	RPH3AL	1.349930096	0.022158408	0.177038407	0.150332833	0.145860965	6.87E-05	0.000146579	35	51	51
ENSG00000075785.8	RAB7A	1.349896398	0.055731555	0.177049217	0.044502108	0.045776998	0.0299987	0.025799689	16	18	18
ENSG00000115649.11	CNPPD1	1.349257905	0.018497606	0.177254141	0.276576537	0.203134123	1.78E-06	5.79E-06	59	65	65
ENSG00000113734.13	BNIP1	1.348725179	0.038214387	0.177425255	0.071521909	0.04726025	0.027395455	0.023998436	33	37	37
ENSG00000172716.12	SLFN11	1.348266642	0.047529903	0.177572637	0.040609813	0.07307309	0.005752221	0.006589296	11	11	11
ENSG00000144681.6	STAC	-1.347783925	-0.051208923	0.177727889	0.051875677	0.114784345	0.000464229	0.000778253	27	28	28
ENSG00000130717.8	UCK1	-1.347514383	-0.037877577	0.177814624	0.070384218	0.044745519	0.031957354	0.027180199	29	30	30
ENSG00000127472.6	PLA2G5	-1.347382131	-0.027024431	0.177857193	0.241115517	0.204165603	1.66E-06	5.49E-06	61	70	70
ENSG00000162975.3	KCNF1	-1.347159017	-0.039540072	0.177929024	0.06214684	0.042779536	0.036062449	0.030000791	25	26	26
ENSG00000137135.13	ARHGEF39	1.347107086	0.036903009	0.177945746	0.073417442	0.112621501	0.000529485	0.000868711	10	11	11
ENSG00000173110.6	HSPA6	-1.34389146	-0.076520481	0.178983488	0.020428104	0.036674316	0.052644782	0.040579623	9	12	12
ENSG00000105464.3	GRIN2D	1.342014016	0.019838242	0.179591451	0.197155285	0.122587062	0.000288439	0.000511424	48	57	57
ENSG00000089335.16	ZNF302	1.341416775	0.019762033	0.179785174	0.289313696	0.48247163	4.04E-16	1.02E-14	30	31	31
ENSG00000196335.8	STK31	-1.34038503	-0.022423431	0.1801202	0.235988023	0.269292239	1.96E-08	9.83E-08	45	50	50
ENSG00000160294.6	MCM3AP	-1.340155224	-0.031877545	0.180194885	0.119072451	0.074712664	0.005212295	0.006052988	43	60	60
ENSG00000092148.8	HECTD1	1.339673479	0.018898319	0.180351523	0.295141138	0.082913168	0.003183832	0.00398963	83	90	90
ENSG00000197375.8	SLC22A5	-1.339536661	-0.046890279	0.180396028	0.04884159	0.05194816	0.020586444	0.019082871	9	10	10
ENSG00000158714.6	SLAMF8	1.339068436	0.01618599	0.180548395	0.57895923	0.573719233	2.07E-20	1.88E-18	54	57	57
ENSG00000131737.5	KRT34	-1.337693272	-0.034774766	0.180996445	0.098149024	0.045347265	0.0307993	0.026344573	30	35	35
ENSG00000064989.8	CALCRL	-1.337491168	-0.179181594	0.181062363	0.002618808	0.07009016	0.006882393	0.007658786	15	18	18
ENSG00000213066.7	FGFR1OP	1.337032425	0.049239039	0.181212053	0.036905331	0.068316586	0.007657397	0.008360012	14	19	19
ENSG00000141013.10	GAS8	1.335940891	0.021152723	0.181568594	0.22776497	0.411057634	2.98E-13	4.20E-12	21	30	30
ENSG00000144134.14	RABL2A	1.335692917	0.019783269	0.181649665	0.154521931	0.112263628	0.000541126	0.000884937	52	60	60
ENSG00000223865.6	HLA-DPB1	1.335275397	0.031442813	0.181786228	0.129991217	0.508376323	2.94E-17	9.56E-16	59	77	77
ENSG00000256294.3	ZNF225	-1.333966165	-0.045715628	0.182214946	0.039699591	0.057604934	0.014609527	0.014471617	34	41	41
ENSG00000083454.17	P2RX5	1.333723839	0.040330633	0.182294379	0.07410116	0.133319072	0.0001493	0.000291456	17	19	19
ENSG00000100373.5	UPK3A	-1.333710465	-0.018234758	0.182298764	0.328356501	0.076119691	0.004789589	0.00562489	68	81	81
ENSG00000197497.6	ZNF665	-1.333410524	-0.026377225	0.182397121	0.140522488	0.07642823	0.004701584	0.005532557	46	62	62
ENSG00000143771.7	CNIH4	-1.333246414	-0.041205552	0.182450952	0.062453965	0.099086813	0.001201918	0.001739579	33	39	39
ENSG00000176046.7	NUPR1	-1.332562302	-0.051506338	0.182675483	0.044210984	0.050397601	0.022623007	0.02049274	20	29	29
ENSG00000115657.8	ABCB6	1.332027683	0.048996641	0.182851092	0.04075065	0.102120074	0.001000646	0.001485968	10	12	12
ENSG00000169413.2	RNASE6	1.331031801	0.02911962	0.183178547	0.143854041	0.052338756	0.020103503	0.018728452	52	61	61
ENSG00000184154.8	LRTOMT	1.330846069	0.087249598	0.183239666	0.025940492	0.057429484	0.014765406	0.01459741	5	7	7
ENSG00000168297.11	PXK	1.33079125	0.020695388	0.183257708	0.251652938	0.155874796	3.68E-05	8.40E-05	38	51	51
ENSG00000143418.15	CERS2	-1.330502366	-0.028425136	0.183352807	0.127343584	0.156762458	3.48E-05	7.99E-05	35	39	39
ENSG00000073792.11	IGF2BP2	1.330220589	0.027177893	0.183445602	0.133992679	0.153738566	4.20E-05	9.43E-05	34	38	38
ENSG00000205281.6	GOLGA6L10	-1.328193658	-0.029234601	0.184114139	0.105169463	0.171144205	1.40E-05	3.59E-05	19	20	20
ENSG00000177058.7	SLC38A9	1.328171249	0.03301837	0.18412154	0.105334116	0.125145981	0.000246633	0.000446475	29	31	31
ENSG00000104763.13	ASAH1	1.325477343	0.025090361	0.185012879	0.18535787	0.215709063	7.74E-07	2.75E-06	50	53	53
ENSG00000166938.8	DIS3L	1.325144199	0.014031563	0.185123329	0.460571528	0.311087596	9.35E-10	6.06E-09	58	64	64
ENSG00000177700.5	POLR2L	-1.324521706	-0.080845415	0.185329839	0.016618018	0.07570866	0.004909396	0.005752298	14	20	20
ENSG00000006128.7	TAC1	1.324505636	0.038591248	0.185335173	0.069467098	0.065711448	0.008957623	0.009552522	34	43	43
ENSG00000163956.6	LRPAP1	-1.323397203	-0.0274553	0.185703321	0.087765801	0.092756996	0.001760673	0.002404638	22	25	25
ENSG00000219481.6	NBPF1	1.322582296	0.059689872	0.185974325	0.039367758	0.099887775	0.001145161	0.001672489	19	35	35
ENSG00000103249.13	CLCN7	-1.32170666	-0.036192387	0.18626585	0.061651067	0.226197439	3.84E-07	1.49E-06	29	33	33
ENSG00000106244.8	PDAP1	-1.320904044	-0.05599993	0.186533361	0.03247641	0.041291395	0.039528219	0.032246955	7	8	8
ENSG00000204531.11	POU5F1	1.320649748	0.048119835	0.186618177	0.044488265	0.114608153	0.000469233	0.000784764	16	20	20
ENSG00000198729.4	PPP1R14C	1.320579207	0.035618725	0.18664171	0.074134448	0.042909376	0.035775309	0.029853188	32	38	38
ENSG00000163328.9	GPR155	-1.319807503	-0.032314715	0.186899296	0.082231896	0.090433894	0.002025099	0.002719576	25	27	27
ENSG00000186532.7	SMYD4	-1.319520234	-0.032465093	0.18699525	0.103394558	0.141530097	8.99E-05	0.000185637	28	33	33
ENSG00000130529.11	TRPM4	1.319076244	0.113004359	0.187143624	0.007626012	0.099790995	0.001151875	0.001680907	6	8	8
ENSG00000147853.12	AK3	-1.318709235	-0.027962116	0.187266338	0.112681858	0.067298314	0.008141368	0.00880954	37	42	42
ENSG00000198963.6	RORB	-1.318039014	-0.059042319	0.187490588	0.031362122	0.051567651	0.021068264	0.019402388	11	12	12
ENSG00000184227.3	ACOT1	-1.316398798	-0.024080188	0.188040226	0.14866425	0.269856673	1.88E-08	9.47E-08	27	30	30
ENSG00000138246.11	DNAJC13	1.316193155	0.042317083	0.188109221	0.064080537	0.124758475	0.000252555	0.000455564	15	15	15
ENSG00000160712.8	IL6R	1.3153919	0.042543942	0.188378226	0.058416279	0.033203382	0.065446495	0.048199723	41	44	44
ENSG00000139780.7	METTL21C	1.312173495	0.03860977	0.189461603	0.074011072	0.043020655	0.035531089	0.0296774	20	21	21
ENSG00000011083.4	SLC6A7	1.311705133	0.028674691	0.189619644	0.13517775	0.271313815	1.70E-08	8.59E-08	17	18	18
ENSG00000142945.8	KIF2C	1.311083025	0.106824305	0.189829715	0.007709109	0.051909369	0.020635046	0.019122912	6	8	8
ENSG00000101333.12	PLCB4	-1.310798088	-0.037841476	0.189925989	0.076060465	0.175788265	1.04E-05	2.75E-05	39	46	46
ENSG00000174780.11	SRP72	1.310705358	0.021774672	0.189957328	0.193733174	0.036794016	0.05225305	0.040359251	50	57	57
ENSG00000211448.7	DIO2	-1.310448855	-0.017491093	0.190044036	0.304359084	0.158221323	3.17E-05	7.38E-05	115	121	121
ENSG00000198563.9	DDX39B	-1.310339266	-0.053958854	0.19008109	0.037946232	0.049947776	0.023251399	0.020949301	7	14	14
ENSG00000104408.5	EIF3E	-1.308948482	-0.277873634	0.190551802	0.001243981	0.104938976	0.000843758	0.001287537	2	2	2
ENSG00000153446.11	C16orf89	1.307794056	0.068310976	0.190943171	0.021404343	0.036280259	0.053956146	0.041302487	8	8	8
ENSG00000143545.4	RAB13	-1.307466027	-0.047598163	0.191054486	0.029054941	0.041401075	0.039261433	0.032095932	8	9	9
ENSG00000104714.9	ERICH1	1.307396872	0.02916316	0.191077959	0.130262233	0.219732977	5.92E-07	2.19E-06	28	34	34
ENSG00000019144.12	PHLDB1	1.307106798	0.022044369	0.191176443	0.182110924	0.155630584	3.73E-05	8.50E-05	34	36	36
ENSG00000013810.14	TACC3	1.306176027	0.047415403	0.191492703	0.041667096	0.188499083	4.61E-06	1.33E-05	31	42	42
ENSG00000186510.7	CLCNKA	1.306159935	0.034382867	0.191498174	0.066224066	0.099192484	0.001194273	0.001730639	24	32	32
ENSG00000115286.15	NDUFS7	1.305409361	0.07562328	0.191753493	0.013654788	0.068388831	0.007624179	0.008332059	8	10	10
ENSG00000100372.10	SLC25A17	-1.305167796	-0.138122587	0.191835718	0.005389741	0.039288312	0.044744332	0.035551147	11	12	12
ENSG00000131408.9	NR1H2	1.304978967	0.214831751	0.19190001	0.002386464	0.085316901	0.002755334	0.003526201	1	1	1
ENSG00000142794.14	NBPF3	-1.304420404	-0.014652474	0.192090282	0.418514859	0.563660152	6.78E-20	4.68E-18	83	99	99
ENSG00000026297.11	RNASET2	1.304367279	0.040921655	0.192108386	0.065650936	0.178334082	8.86E-06	2.37E-05	17	24	24
ENSG00000184497.8	TMEM255B	1.303842705	0.045869818	0.192287219	0.044517442	0.034285889	0.061136519	0.045691451	25	40	40
ENSG00000241878.5	PISD	-1.303655569	-0.0282157	0.192351045	0.130364355	0.179063092	8.46E-06	2.27E-05	33	38	38
ENSG00000164691.12	TAGAP	-1.303375564	-0.037810038	0.192446575	0.075093789	0.066058309	0.008772446	0.009383335	27	31	31
ENSG00000204767.3	FAM196B	-1.303301396	-0.040343036	0.192471885	0.058322848	0.039282692	0.044759929	0.035555553	22	24	24
ENSG00000162910.14	MRPL55	-1.302977294	-0.030103642	0.192582513	0.098196767	0.206568736	1.42E-06	4.77E-06	14	20	20
ENSG00000188015.5	S100A3	1.302787517	0.067630454	0.192647314	0.0232431	0.082164086	0.003330498	0.004149679	23	24	24
ENSG00000115165.5	CYTIP	1.30233958	0.039121504	0.192800327	0.068301225	0.056756212	0.015379364	0.015094695	24	24	24
ENSG00000162290.12	DCP1A	-1.302111113	-0.039090582	0.192878405	0.056573546	0.095306118	0.001509907	0.002108559	15	16	16
ENSG00000180834.3	MAP6D1	-1.302070503	-0.033253257	0.192892286	0.11873592	0.339171909	1.10E-10	8.92E-10	19	22	22
ENSG00000112584.9	FAM120B	1.301799206	0.049255954	0.192985035	0.052178931	0.145776543	6.91E-05	0.000147262	10	12	12
ENSG00000151090.13	THRB	-1.300855442	-0.03843048	0.19330794	0.058349797	0.079173252	0.003986476	0.004814381	25	25	25
ENSG00000122687.13	FTSJ2	1.300556922	0.032389122	0.19341016	0.09919594	0.218930056	6.24E-07	2.29E-06	15	16	16
ENSG00000124104.14	SNX21	-1.299148673	-0.026831477	0.193892912	0.122819398	0.233376183	2.36E-07	9.59E-07	16	18	18
ENSG00000115041.8	KCNIP3	-1.297118812	-0.131575391	0.19459031	0.005850681	0.04955363	0.023816628	0.021366049	12	21	21
ENSG00000120662.11	MTRF1	1.294723278	0.019209858	0.195415707	0.328399939	0.278721713	1.00E-08	5.34E-08	53	61	61
ENSG00000099365.5	STX1B	-1.294356434	-0.035786706	0.195542332	0.087529264	0.205757972	1.50E-06	5.00E-06	16	17	17
ENSG00000070081.11	NUCB2	-1.293016851	-0.022170971	0.196005231	0.163728018	0.09164466	0.001882695	0.002546708	54	58	58
ENSG00000109943.4	CRTAM	1.292834874	0.016951019	0.196068176	0.377540255	0.22344184	4.62E-07	1.75E-06	73	78	78
ENSG00000127527.9	EPS15L1	-1.291990724	-0.027266065	0.196360357	0.144076817	0.198453498	2.41E-06	7.57E-06	20	26	26
ENSG00000174990.3	CA5A	1.291880297	0.045800729	0.196398602	0.054660724	0.165541933	2.00E-05	4.93E-05	17	22	22
ENSG00000136870.6	ZNF189	1.291355222	0.02943633	0.19658053	0.121982437	0.22906026	3.16E-07	1.25E-06	18	18	18
ENSG00000048544.5	MRPS10	1.290449981	0.030163873	0.196894468	0.112990343	0.053888203	0.018298457	0.017353072	46	52	52
ENSG00000196666.3	FAM180B	-1.290076967	-0.037557113	0.197023936	0.059570406	0.051579105	0.021053594	0.019393927	13	16	16
ENSG00000147457.9	CHMP7	-1.287594978	-0.041038064	0.197886988	0.056990683	0.155582973	3.74E-05	8.52E-05	12	12	12
ENSG00000185477.4	GPRIN3	1.286684359	0.016306749	0.198204327	0.384713694	0.221876865	5.13E-07	1.93E-06	63	68	68
ENSG00000172594.8	SMPDL3A	1.286349379	0.026090252	0.198321157	0.16421823	0.21052464	1.09E-06	3.79E-06	22	24	24
ENSG00000203734.7	ECT2L	-1.28613395	-0.047185123	0.198396317	0.039040202	0.048941826	0.024721895	0.022021876	20	25	25
ENSG00000118849.5	RARRES1	1.28557969	0.029290372	0.198589789	0.101635603	0.07880989	0.0040745	0.004903944	20	33	33
ENSG00000185787.10	MORF4L1	-1.285092419	-0.038442363	0.198759991	0.065298633	0.044203272	0.033039176	0.027905723	28	30	30
ENSG00000125505.12	MBOAT7	-1.284723466	-0.040032727	0.198888935	0.051280661	0.053975374	0.018201939	0.017299142	23	30	30
ENSG00000144045.9	DQX1	-1.284407578	-0.054004587	0.198999383	0.032610235	0.038407528	0.047258837	0.037181549	9	11	11
ENSG00000164627.13	KIF6	1.283259759	0.057454006	0.199401086	0.036444388	0.096897257	0.001371735	0.001942444	26	28	28
ENSG00000166140.13	ZFYVE19	1.283224925	0.035130089	0.199413286	0.086835748	0.274967751	1.31E-08	6.78E-08	18	21	21
ENSG00000126088.8	UROD	1.282433028	0.115692786	0.199690784	0.007324682	0.032545873	0.068219187	0.049909223	14	16	16
ENSG00000058085.10	LAMC2	-1.282263824	-0.030981566	0.199750114	0.104398621	0.120477201	0.000328124	0.000572322	19	21	21
ENSG00000153563.11	CD8A	-1.282044558	-0.029150176	0.199827016	0.095901196	0.142052758	8.70E-05	0.000180562	19	25	25
ENSG00000182253.10	SYNM	1.281238632	0.028357963	0.200109861	0.106273664	0.135320423	0.000131974	0.000261676	26	27	27
ENSG00000037637.6	FBXO42	1.281231714	0.039637273	0.20011229	0.062733164	0.102566169	0.000974016	0.00145436	23	28	28
ENSG00000198937.8	CCDC167	1.280741505	0.031089433	0.200284476	0.094991341	0.037566234	0.049797723	0.038842121	43	46	46
ENSG00000176472.6	ZNF575	1.28049576	0.061649915	0.200370835	0.027018652	0.046993307	0.027846297	0.024313059	8	8	8
ENSG00000078814.11	MYH7B	-1.279659053	-0.024263287	0.200665071	0.181410976	0.253490902	5.93E-08	2.70E-07	57	67	67
ENSG00000118495.14	PLAGL1	1.279049541	0.029345975	0.200879611	0.080749171	0.043807875	0.033851683	0.028476395	32	35	35
ENSG00000197892.8	KIF13B	1.278558839	0.052719727	0.201052452	0.033238782	0.055945844	0.016152742	0.015701276	11	12	12
ENSG00000101146.8	RAE1	-1.278446108	-0.01858788	0.201092175	0.278326634	0.156813159	3.47E-05	7.98E-05	75	86	86
ENSG00000162144.5	CYB561A3	-1.278320115	-0.085523851	0.201136578	0.014222878	0.057432422	0.014762782	0.01459741	12	14	14
ENSG00000198728.6	LDB1	1.276634553	0.05540263	0.201731297	0.028811326	0.040949113	0.040372888	0.032799871	10	10	10
ENSG00000180921.6	FAM83H	1.276514111	0.02189908	0.201773842	0.229495855	0.445641319	1.35E-14	2.45E-13	18	21	21
ENSG00000183044.7	ABAT	-1.276513602	-0.01604679	0.201774022	0.3129964	0.099316005	0.001185398	0.001721304	75	82	82
ENSG00000117335.14	CD46	1.276019286	0.017370804	0.201948702	0.326040523	0.424146179	9.44E-14	1.50E-12	41	43	43
ENSG00000171246.5	NPTX1	-1.275323833	-0.026485105	0.202194646	0.137910982	0.186441525	5.26E-06	1.50E-05	26	28	28
ENSG00000166689.10	PLEKHA7	1.274288854	0.462940631	0.202561065	0.000974034	0.099658966	0.001161098	0.001691573	3	3	3
ENSG00000175785.8	PRIMA1	1.274041445	0.084301455	0.202648728	0.012411845	0.033875775	0.062733238	0.046618843	8	9	9
ENSG00000268040.1	PRED62	1.273484633	0.039763983	0.202846122	0.069871259	0.095424709	0.001499148	0.00209626	20	24	24
ENSG00000175390.8	EIF3F	-1.273238055	-0.041191999	0.20293358	0.065322115	0.130879132	0.000173488	0.000331897	10	11	11
ENSG00000143379.8	SETDB1	-1.272973091	-0.074321522	0.203027591	0.031297053	0.047980738	0.026215512	0.023119792	5	8	8
ENSG00000144034.10	TPRKB	1.271942953	0.024221465	0.203393389	0.153804769	0.056645861	0.015482432	0.015162198	44	51	51
ENSG00000133739.11	LRRCC1	1.271904775	0.035666186	0.203406955	0.08498154	0.106467012	0.000769184	0.001194339	16	18	18
ENSG00000083812.7	ZNF324	-1.270842292	-0.04432919	0.20378476	0.044180386	0.034870006	0.058935482	0.044336863	48	59	59
ENSG00000131966.9	ACTR10	1.27051481	0.032993648	0.203901311	0.08911742	0.035572009	0.056399458	0.042791313	35	37	37
ENSG00000186897.3	C1QL4	-1.270079127	-0.017315805	0.204056446	0.348927409	0.099357506	0.00118243	0.001718407	78	96	96
ENSG00000185272.9	RBM11	1.269660741	0.065948917	0.204205503	0.019822688	0.065474131	0.009086578	0.009652213	5	6	6
ENSG00000110274.10	CEP164	-1.269471078	-0.016669579	0.2042731	0.331111158	0.446276339	1.27E-14	2.33E-13	34	34	34
ENSG00000137106.13	GRHPR	1.269059449	0.032668888	0.204419862	0.076714539	0.194958823	3.03E-06	9.25E-06	16	16	16
ENSG00000057757.5	PITHD1	-1.2689671	-0.056677748	0.204452798	0.039483836	0.055605973	0.016488719	0.015962067	17	17	17
ENSG00000105287.8	PRKD2	-1.267300221	-0.021052161	0.205047962	0.22116463	0.202146317	1.90E-06	6.13E-06	43	50	50
ENSG00000104147.4	OIP5	-1.266485628	-0.015345088	0.205339272	0.361663195	0.168469458	1.66E-05	4.18E-05	71	74	74
ENSG00000165312.5	OTUD1	1.266426152	0.145290542	0.205360553	0.004029962	0.043060538	0.03544398	0.029631432	2	2	2
ENSG00000149506.6	ZP1	1.2649136	0.043803264	0.205902302	0.044300735	0.068700542	0.007482506	0.008206884	17	18	18
ENSG00000105641.3	SLC5A5	1.264682016	0.031041263	0.205985339	0.088948992	0.071619935	0.006277434	0.007087532	30	32	32
ENSG00000089737.11	DDX24	-1.264284862	-0.029911837	0.206127801	0.130053938	0.068242996	0.007691384	0.00838571	56	57	57
ENSG00000196268.7	ZNF493	1.263459483	0.040898773	0.206424099	0.07370116	0.32650942	2.91E-10	2.12E-09	34	55	55
ENSG00000112773.11	FAM46A	1.262492067	0.028101135	0.206771779	0.112434005	0.180598354	7.67E-06	2.09E-05	17	18	18
ENSG00000204961.5	PCDHA9	1.261534182	0.025010311	0.207116453	0.200745902	0.353918729	3.44E-11	3.12E-10	25	26	26
ENSG00000255150.1	EID3	1.259844039	0.053396707	0.207725629	0.035363494	0.080507813	0.003679176	0.004513683	8	8	8
ENSG00000198553.4	KCNRG	1.258926701	0.012187219	0.208056809	0.597103266	0.14108915	9.24E-05	0.000190446	104	131	131
ENSG00000181195.6	PENK	1.256918719	0.020638463	0.208783069	0.204319148	0.144259195	7.59E-05	0.000159801	55	61	61
ENSG00000100319.11	ZMAT5	1.256760994	0.028339744	0.208840194	0.132062814	0.057943856	0.01431311	0.0142338	48	51	51
ENSG00000066654.8	THUMPD1	1.255547831	0.03762527	0.209279956	0.056235173	0.061369085	0.011637957	0.011939337	28	28	28
ENSG00000064601.12	CTSA	1.2546166	0.034450855	0.209617974	0.089479637	0.12820995	0.000204397	0.000382344	23	26	26
ENSG00000206503.7	HLA-A	1.253954794	0.026820429	0.209858437	0.136633493	0.566454385	4.89E-20	3.53E-18	104	133	133
ENSG00000111981.4	ULBP1	-1.253253933	-0.02561888	0.210113308	0.147797979	0.336376373	1.36E-10	1.08E-09	12	15	15
ENSG00000240344.4	PPIL3	1.25268708	0.019645642	0.21031961	0.238617129	0.319390776	5.00E-10	3.45E-09	30	33	33
ENSG00000184363.5	PKP3	1.252561986	0.11304668	0.210365157	0.008096726	0.145025238	7.24E-05	0.000153287	3	12	12
ENSG00000088305.14	DNMT3B	-1.251265445	-0.057030182	0.210837648	0.029428335	0.041622713	0.038727974	0.031725822	10	11	11
ENSG00000136449.9	MYCBPAP	-1.251029767	-0.04226201	0.210923617	0.059659332	0.197457484	2.58E-06	8.04E-06	25	26	26
ENSG00000159685.6	CHCHD6	1.25083343	0.724952696	0.210995256	0.00019188	0.039373688	0.044508086	0.0354271	7	7	7
ENSG00000111348.4	ARHGDIB	-1.250599893	-0.058180904	0.21108049	0.02842416	0.034266716	0.061210206	0.045727199	23	24	24
ENSG00000219435.3	TEX40	-1.248791825	-0.026694676	0.211741225	0.096016675	0.148919779	5.68E-05	0.000123801	24	26	26
ENSG00000182511.7	FES	1.248556009	0.018059604	0.211827511	0.289203475	0.056978102	0.015174219	0.014918183	60	64	64
ENSG00000251695.2	AC124890.1	-1.24749632	-0.045245167	0.212215569	0.043422946	0.088551567	0.002268071	0.002986905	11	11	11
ENSG00000164924.13	YWHAZ	-1.246775604	-0.024568497	0.212479788	0.140649308	0.323714778	3.60E-10	2.58E-09	28	30	30
ENSG00000087087.14	SRRT	1.246447921	0.418525991	0.212599998	0.00049342	0.049940958	0.023261059	0.020952668	1	1	1
ENSG00000164841.4	TMEM74	1.246205597	0.040604884	0.212688925	0.074959875	0.062924104	0.010595955	0.011007628	28	29	29
ENSG00000134744.9	ZCCHC11	-1.243415505	-0.024831675	0.213714759	0.227531206	0.319223994	5.07E-10	3.47E-09	41	41	41
ENSG00000187607.11	ZNF286A	1.243310487	0.658941046	0.213753441	0.000319031	0.051013679	0.021790332	0.019912976	2	8	8
ENSG00000135341.13	MAP3K7	1.241852489	0.014028794	0.214290992	0.455224599	0.102306903	0.000989407	0.00147485	119	125	125
ENSG00000159214.8	CCDC24	1.240484649	0.088264436	0.214796189	0.015998553	0.039019564	0.045496513	0.036043536	10	11	11
ENSG00000198598.2	MMP17	-1.238318008	-0.072364408	0.215598169	0.018667864	0.040537743	0.041412772	0.033429715	14	17	17
ENSG00000198089.10	SFI1	-1.237927024	-0.027933159	0.215743121	0.116874251	0.26079396	3.56E-08	1.69E-07	10	10	10
ENSG00000177000.6	MTHFR	-1.237896768	-0.019339559	0.215754341	0.200802029	0.326456478	2.92E-10	2.12E-09	18	24	24
ENSG00000113716.8	HMGXB3	1.236426711	0.912589248	0.216299992	0.000130531	0.049740135	0.023547442	0.021158086	1	1	1
ENSG00000129116.13	PALLD	-1.235935761	-0.035660866	0.216482443	0.087977654	0.079915957	0.003812424	0.004642221	35	37	37
ENSG00000055130.11	CUL1	1.235916159	0.009690571	0.21648973	0.697982535	0.185096312	5.74E-06	1.62E-05	125	143	143
ENSG00000163697.12	APBB2	1.233919392	0.018688715	0.217232943	0.215724924	0.276125201	1.20E-08	6.30E-08	34	35	35
ENSG00000183087.10	GAS6	-1.233693745	-0.069679423	0.217317045	0.021672243	0.079389491	0.003934997	0.00475871	3	3	3
ENSG00000221819.2	C16orf3	1.23243757	0.022846699	0.217785674	0.184442526	0.431386225	4.94E-14	8.37E-13	20	34	34
ENSG00000196263.3	ZNF471	-1.231934823	-0.023708153	0.217973432	0.150796817	0.231715507	2.64E-07	1.06E-06	33	42	42
ENSG00000178996.8	SNX18	1.231318839	0.038837145	0.218203639	0.05826654	0.100680154	0.001091634	0.001608258	15	16	16
ENSG00000099337.3	KCNK6	1.231188971	0.041398243	0.218252195	0.063091293	0.05185659	0.020701361	0.019169301	20	23	23
ENSG00000236624.4	CCDC163P	-1.23081942	-0.013512458	0.218390411	0.445824306	0.640668041	3.51E-24	7.77E-22	26	26	26
ENSG00000158615.8	PPP1R15B	1.229544031	0.016380762	0.2188679	0.59014045	0.175461351	1.06E-05	2.80E-05	105	115	115
ENSG00000243284.1	VSIG8	1.228642167	0.038837868	0.219205998	0.054915953	0.130535129	0.000177196	0.000338076	10	12	12
ENSG00000069974.11	RAB27A	-1.228386793	-0.028108529	0.219301803	0.114331304	0.219319034	6.08E-07	2.24E-06	17	19	19
ENSG00000161328.10	LRRC56	1.228339479	0.035293822	0.219319557	0.064009125	0.18136314	7.30E-06	2.00E-05	29	42	42
ENSG00000159128.10	IFNGR2	1.22810373	0.030600207	0.219408031	0.123629777	0.11607618	0.000429123	0.000726283	36	39	39
ENSG00000103510.15	KAT8	-1.227824519	-0.033364058	0.219512849	0.077100837	0.221523392	5.25E-07	1.97E-06	19	25	25
ENSG00000109794.9	FAM149A	-1.22763702	-0.024149461	0.219583258	0.124441656	0.295665304	2.93E-09	1.70E-08	14	18	18
ENSG00000167711.9	SERPINF2	1.227023559	0.031907215	0.219813736	0.119872648	0.190896502	3.95E-06	1.16E-05	32	36	36
ENSG00000237440.4	ZNF737	1.226512843	0.05403155	0.220005745	0.023959424	0.073409813	0.005636944	0.006478073	17	44	44
ENSG00000139278.5	GLIPR1	1.226012547	0.025471896	0.220193953	0.141511485	0.05538326	0.016712716	0.01613035	46	50	50
ENSG00000240771.2	ARHGEF25	-1.225176766	-0.044077152	0.220508626	0.034989064	0.09462597	0.001573113	0.00218475	50	54	54
ENSG00000073670.9	ADAM11	-1.225061175	-0.051076256	0.220552172	0.032116217	0.108298822	0.000688357	0.001086533	7	8	8
ENSG00000166896.3	XRCC6BP1	1.224863153	0.017214912	0.220626785	0.252070393	0.413699019	2.37E-13	3.48E-12	10	10	10
ENSG00000171735.14	CAMTA1	1.224516052	0.031012869	0.220757615	0.086964081	0.06513532	0.009273929	0.009821732	42	49	49
ENSG00000103197.12	TSC2	1.222878861	0.039793237	0.221375454	0.057144046	0.059956611	0.012673852	0.012864017	10	15	15
ENSG00000166407.9	LMO1	-1.222845798	-0.056523387	0.221387944	0.023259254	0.036198076	0.054233906	0.041479154	9	9	9
ENSG00000063854.8	HAGH	-1.222711998	-0.018137062	0.221438494	0.404704166	0.284580409	6.56E-09	3.62E-08	74	104	104
ENSG00000162194.8	C11orf48	-1.221210829	-0.04361395	0.222006205	0.047259429	0.099866005	0.001146668	0.001673999	13	19	19
ENSG00000116885.14	OSCP1	-1.220841439	-0.030170894	0.222146061	0.070388875	0.150592674	5.12E-05	0.000113038	7	7	7
ENSG00000218739.5	AC007390.5	1.219980905	0.020930128	0.222472113	0.182189865	0.307528491	1.22E-09	7.66E-09	18	19	19
ENSG00000113318.9	MSH3	1.219610483	0.049511524	0.222612571	0.035402018	0.0876243	0.002398229	0.003130344	9	9	9
ENSG00000100714.11	MTHFD1	1.219332346	0.027870458	0.222718076	0.112739797	0.074420309	0.005304707	0.006142157	25	29	29
ENSG00000102921.3	N4BP1	-1.219185033	-0.031340723	0.222773971	0.11462194	0.122687615	0.000286671	0.000509055	45	49	49
ENSG00000241370.1	RPP21	-1.218857602	-0.024600823	0.222898244	0.14719218	0.071973982	0.006145201	0.006969337	42	58	58
ENSG00000163870.10	TPRA1	1.218816048	0.020622335	0.222914019	0.184400903	0.391686364	1.56E-12	1.90E-11	47	49	49
ENSG00000197329.7	PELI1	-1.217767629	-0.031798247	0.223312289	0.076194055	0.071574845	0.006294478	0.007101484	26	29	29
ENSG00000066629.12	EML1	-1.217651621	-0.018731038	0.223356389	0.242628012	0.104259348	0.00087919	0.00133417	72	74	74
ENSG00000108439.5	PNPO	1.21759545	0.040322478	0.223377744	0.048918907	0.127135464	0.000218324	0.000404333	15	16	16
ENSG00000164241.9	C5orf63	1.214915463	0.039818489	0.224398336	0.049539529	0.069996215	0.006921395	0.007696632	20	24	24
ENSG00000171045.10	TSNARE1	1.214817558	0.025406688	0.224435682	0.111960304	0.190516045	4.04E-06	1.18E-05	32	34	34
ENSG00000104412.3	EMC2	1.214741778	0.030410095	0.224464593	0.094043045	0.219535075	6.00E-07	2.21E-06	26	28	28
ENSG00000137843.7	PAK6	1.212742025	0.017046	0.225228467	0.315765763	0.277794296	1.07E-08	5.65E-08	57	60	60
ENSG00000131378.9	RFTN1	1.211953141	0.031471177	0.225530318	0.07759133	0.218687048	6.35E-07	2.32E-06	13	17	17
ENSG00000060749.10	QSER1	-1.211262751	-0.013303628	0.22579472	0.32338221	0.089587707	0.00213094	0.002840212	85	95	95
ENSG00000158552.8	ZFAND2B	1.210195086	0.038083325	0.226204043	0.060928582	0.080425905	0.003697335	0.004525449	10	11	11
ENSG00000117280.8	RAB7L1	-1.210067748	-0.025776231	0.226252898	0.128682644	0.096485243	0.001406258	0.001983391	19	22	22
ENSG00000165699.9	TSC1	-1.209787038	-0.036633411	0.226360621	0.063310043	0.055222997	0.016875808	0.016252283	39	41	41
ENSG00000154309.7	DISP1	-1.209465963	-0.048421598	0.22648388	0.071019287	0.088290135	0.002304038	0.003027508	17	17	17
ENSG00000198837.5	DENND4B	-1.208819051	-0.030175683	0.226732371	0.07689688	0.035974733	0.054996311	0.041953644	13	17	17
ENSG00000117640.13	MTFR1L	1.206382925	0.033975648	0.227669877	0.063579321	0.116622958	0.000415068	0.000704518	15	21	21
ENSG00000164946.15	FREM1	1.205402294	0.028438178	0.228048036	0.088628801	0.056686773	0.015444139	0.015128886	36	39	39
ENSG00000185619.13	PCGF3	-1.205333133	-0.01719238	0.228074724	0.288598521	0.285258654	6.25E-09	3.46E-08	42	64	64
ENSG00000077380.11	DYNC1I2	1.204892345	0.052549316	0.228244864	0.028649347	0.071300302	0.006399263	0.007197473	17	18	18
ENSG00000113621.10	TXNDC15	1.204727389	0.013572947	0.228308559	0.33336411	0.572471865	2.40E-20	2.12E-18	10	10	10
ENSG00000183569.13	SERHL2	-1.204573398	-0.025404179	0.228368031	0.127614104	0.102310646	0.000989183	0.00147485	43	46	46
ENSG00000123901.4	GPR83	-1.204530867	-0.019199844	0.228384459	0.335625367	0.360106371	2.10E-11	2.00E-10	56	68	68
ENSG00000108039.13	XPNPEP1	-1.204376405	-0.032754693	0.228444127	0.072284276	0.058506363	0.013834511	0.01383956	24	29	29
ENSG00000166402.4	TUB	-1.203864803	-0.028873907	0.228641838	0.09721618	0.038979188	0.045610647	0.036117778	27	29	29
ENSG00000106733.16	NMRK1	-1.203649575	-0.012647591	0.22872505	0.515671133	0.487728576	2.40E-16	6.58E-15	60	66	66
ENSG00000009413.11	REV3L	-1.203322391	-0.03518116	0.228851587	0.062220415	0.089088895	0.002195894	0.002905917	21	24	24
ENSG00000176393.6	RNPEP	-1.202904295	-0.05516464	0.229013358	0.02217391	0.035911651	0.055213668	0.04209198	5	6	6
ENSG00000137601.11	NEK1	1.2028321	0.043559151	0.2290413	0.047066238	0.058050746	0.014220893	0.014165991	14	14	14
ENSG00000124103.8	FAM209A	-1.200402097	-0.017164845	0.229983215	0.212392097	0.051291693	0.021424863	0.019658457	86	96	96
ENSG00000173214.5	KIAA1919	1.199599721	0.030504783	0.230294835	0.091928839	0.103895776	0.000898747	0.001359764	39	42	42
ENSG00000189045.9	ANKDD1B	1.198480905	0.022666245	0.230729852	0.138423029	0.113281116	0.000508675	0.000840809	36	40	40
ENSG00000115840.9	SLC25A12	-1.198348529	-0.030898312	0.230781361	0.091664393	0.261564417	3.38E-08	1.61E-07	20	21	21
ENSG00000144837.4	PLA1A	1.197973342	0.026138697	0.230927395	0.138264739	0.110166193	0.000614633	0.000988243	50	55	55
ENSG00000163811.7	WDR43	1.197339341	0.02447422	0.231174316	0.137059912	0.112360774	0.000537941	0.00088095	52	55	55
ENSG00000184983.5	NDUFA6	-1.196888556	-0.020153277	0.231349995	0.256251195	0.411792594	2.80E-13	3.96E-12	19	23	23
ENSG00000169169.10	CPT1C	1.195833693	0.050641036	0.231761465	0.032061171	0.074523373	0.005271943	0.00610822	9	14	14
ENSG00000109576.9	AADAT	-1.195054591	-0.063245661	0.232065702	0.020407789	0.069230938	0.007247489	0.007996406	18	21	21
ENSG00000118961.10	C2orf43	1.194966793	0.90287747	0.232100004	0.000142544	0.062009271	0.011197008	0.011530443	1	1	1
ENSG00000166928.6	MS4A14	-1.194874654	-0.043026676	0.232136007	0.041802018	0.11502851	0.000457383	0.000768596	12	13	13
ENSG00000165388.8	ZNF488	-1.194665649	-0.028395746	0.232217689	0.115933029	0.198779988	2.36E-06	7.43E-06	18	21	21
ENSG00000186732.9	MPPED1	-1.194022835	-0.035971792	0.232469036	0.062156351	0.061201119	0.011756523	0.012036538	20	21	21
ENSG00000182247.5	UBE2E2	1.193556446	0.043417571	0.23265152	0.044327313	0.057948216	0.014309337	0.0142338	9	10	10
ENSG00000160282.9	FTCD	1.193193969	0.020705872	0.232793416	0.195717504	0.340698206	9.74E-11	8.09E-10	38	40	40
ENSG00000122417.11	ODF2L	1.193189582	0.038275109	0.232795134	0.064195021	0.069507617	0.00712785	0.007884077	31	32	32
ENSG00000117400.10	MPL	-1.193177104	-0.685371349	0.23280002	0.000123095	0.036756403	0.052375814	0.040425153	1	1	1
ENSG00000114841.13	DNAH1	1.192809704	0.032799302	0.232943909	0.070679573	0.16295077	2.36E-05	5.65E-05	25	25	25
ENSG00000128039.6	SRD5A3	-1.192533939	-0.018877615	0.233051951	0.224629443	0.210249106	1.11E-06	3.86E-06	53	60	60
ENSG00000182944.13	EWSR1	1.19235384	0.451471375	0.233122532	0.000571029	0.036821934	0.05216212	0.040304189	2	2	2
ENSG00000138658.11	C4orf21	1.191935109	0.045666539	0.233286691	0.039965146	0.067786785	0.007905484	0.008580545	34	35	35
ENSG00000120705.8	ETF1	-1.191911237	-0.02009701	0.233296052	0.242110652	0.069962664	0.006935378	0.007709757	53	71	71
ENSG00000164100.7	NDST3	-1.191901207	-0.600251378	0.233299985	0.000143826	0.042191066	0.037393906	0.030832894	1	1	1
ENSG00000123104.7	ITPR2	-1.191896277	-0.015879784	0.233301918	0.398850179	0.675224706	2.07E-26	9.17E-24	19	21	21
ENSG00000185920.11	PTCH1	-1.19160896	-0.029679641	0.23341461	0.093975395	0.063754541	0.010078544	0.010569445	29	35	35
ENSG00000068724.11	TTC7A	1.191573188	0.037714023	0.233428643	0.061731829	0.052899503	0.019430245	0.018240558	34	35	35
ENSG00000166292.7	TMEM100	-1.191136479	-0.254636777	0.233600011	0.001204903	0.063824088	0.010036384	0.010528354	1	1	1
ENSG00000132406.7	TMEM128	-1.190223328	-0.041464287	0.233958627	0.058454379	0.133411771	0.00014845	0.000289957	14	20	20
ENSG00000150967.13	ABCB9	-1.189944573	-0.031739139	0.234068178	0.085033079	0.209881638	1.14E-06	3.93E-06	8	14	14
ENSG00000143630.5	HCN3	1.188896458	0.021837796	0.234480414	0.201373293	0.127618	0.000211957	0.0003944	52	60	60
ENSG00000213533.7	TMEM110	-1.188865818	-0.034451349	0.234492473	0.059226638	0.066113565	0.008743304	0.009357823	13	18	18
ENSG00000214491.4	SEC14L6	-1.188711246	-0.029991457	0.234553314	0.09152986	0.036598599	0.052894154	0.040736337	18	21	21
ENSG00000184608.4	C8orf12	-1.188400218	-0.035891147	0.23467577	0.055215895	0.039022647	0.04548781	0.036043536	20	23	23
ENSG00000141562.13	NARF	-1.188232005	-0.082082581	0.234742018	0.014637779	0.049806758	0.023452038	0.021087106	11	12	12
ENSG00000136167.9	LCP1	1.186357856	0.042236672	0.235481008	0.042955426	0.036914957	0.051860337	0.040106053	24	30	30
ENSG00000141699.6	FAM134C	1.186321136	0.023191739	0.235495503	0.185247101	0.124983397	0.000249101	0.00045049	40	49	49
ENSG00000176678.4	FOXL1	1.185557126	0.018118409	0.235797242	0.219264091	0.038429544	0.047194232	0.03713898	55	57	57
ENSG00000188997.3	KCTD21	-1.185481373	-0.022294306	0.235827175	0.144264211	0.279105538	9.73E-09	5.21E-08	27	28	28
ENSG00000115257.11	PCSK4	-1.185163788	-0.025565288	0.235952695	0.089431944	0.140871462	9.36E-05	0.000192919	27	33	33
ENSG00000117154.7	IGSF21	-1.184385036	-0.047152094	0.236260681	0.035008077	0.042504618	0.036678285	0.030384486	6	6	6
ENSG00000125148.6	MT2A	-1.18402	-0.016286451	0.236405146	0.396819403	0.12101562	0.00031751	0.000556554	81	92	92
ENSG00000166405.10	RIC3	-1.183572356	-0.021291534	0.236582389	0.176278824	0.320275739	4.68E-10	3.25E-09	23	23	23
ENSG00000100568.6	VTI1B	-1.183554616	-0.051969516	0.236589415	0.027019963	0.042478984	0.036736255	0.030425383	16	16	16
ENSG00000123191.9	ATP7B	-1.183315475	-0.03802564	0.236684142	0.069191293	0.152170998	4.64E-05	0.000102939	16	19	19
ENSG00000241697.3	TMEFF1	-1.183133773	-0.06369462	0.236756135	0.028349576	0.052142616	0.020344557	0.018903234	10	10	10
ENSG00000160679.8	CHTOP	1.18300374	0.052517688	0.236807665	0.033065393	0.097527023	0.001320586	0.001885869	13	13	13
ENSG00000079435.5	LIPE	1.18257397	0.03130043	0.236978034	0.085257205	0.047440295	0.027095597	0.023771082	23	26	26
ENSG00000114796.11	KLHL24	1.182029152	0.022540212	0.237194134	0.171600817	0.286893519	5.55E-09	3.11E-08	31	34	34
ENSG00000196366.1	C9orf163	-1.181955096	-0.023165464	0.237223519	0.175025321	0.072131627	0.006087224	0.00691245	58	69	69
ENSG00000090061.13	CCNK	-1.18165437	-0.018769698	0.237342871	0.288225341	0.170681014	1.44E-05	3.68E-05	96	104	104
ENSG00000081791.4	KIAA0141	-1.181551967	-0.020392731	0.237383522	0.296951538	0.09246994	0.001791388	0.002438115	63	71	71
ENSG00000048540.10	LMO3	-1.181522259	-0.022673119	0.237395316	0.170829759	0.074925269	0.005146106	0.005993833	41	42	42
ENSG00000052344.11	PRSS8	1.181321347	0.028590174	0.23747509	0.09460533	0.127266014	0.000216583	0.00040195	30	46	46
ENSG00000118217.5	ATF6	1.179952135	0.029599517	0.238019253	0.091510967	0.050647579	0.022281304	0.020250629	45	48	48
ENSG00000106003.8	LFNG	1.179338605	0.037597474	0.238263372	0.074825349	0.054675045	0.017445727	0.016723528	23	27	27
ENSG00000120253.9	NUP43	1.17891995	0.026338137	0.238430053	0.105308564	0.13018546	0.000181045	0.000344306	48	54	54
ENSG00000161526.10	SAP30BP	1.17852496	0.051109357	0.238587388	0.037565334	0.032561468	0.068152015	0.049870394	19	25	25
ENSG00000112530.7	PACRG	-1.177970947	-0.063342927	0.238808189	0.018413564	0.164867692	2.09E-05	5.10E-05	9	13	13
ENSG00000128253.9	RFPL2	1.177937462	0.090880388	0.238821539	0.009474681	0.08378725	0.003020822	0.003818987	5	6	6
ENSG00000249915.3	PDCD6	-1.176931691	-0.021320568	0.239222772	0.161869046	0.312572715	8.36E-10	5.48E-09	19	31	31
ENSG00000196275.9	GTF2IRD2	-1.17591076	-0.129799724	0.239630539	0.005808579	0.103344733	0.000929214	0.001401509	4	10	10
ENSG00000196290.10	NIF3L1	1.174878889	0.04872016	0.240043173	0.040853785	0.049314539	0.024166307	0.021624906	12	13	13
ENSG00000100804.14	PSMB5	-1.173355864	-0.060084465	0.240653129	0.024473087	0.081253737	0.003517847	0.004348762	8	9	9
ENSG00000082153.13	BZW1	-1.173335498	-0.051290992	0.240661292	0.020847384	0.053014099	0.019295501	0.018133314	21	23	23
ENSG00000142657.16	PGD	-1.172303815	-0.018701905	0.2410751	0.203073719	0.155955523	3.66E-05	8.36E-05	36	39	39
ENSG00000143001.4	TMEM61	-1.171826871	-0.019199683	0.241266572	0.279752254	0.341649671	9.04E-11	7.56E-10	44	48	48
ENSG00000174007.7	CEP19	-1.171628782	-0.037629105	0.241346127	0.059682442	0.079874402	0.003821958	0.004645834	40	50	50
ENSG00000104343.15	UBE2W	1.170869904	0.012368199	0.241651074	0.477931967	0.335450424	1.46E-10	1.15E-09	106	124	124
ENSG00000100711.9	ZFYVE21	1.168953688	0.019370232	0.242422291	0.188127998	0.137227539	0.000117318	0.000236864	41	54	54
ENSG00000125734.9	GPR108	-1.168571004	-0.015281209	0.242576516	0.399945817	0.571991455	2.54E-20	2.19E-18	34	43	43
ENSG00000019995.6	ZRANB1	1.167018611	0.023623824	0.243202854	0.13249852	0.05735518	0.014831928	0.014637729	51	57	57
ENSG00000108384.10	RAD51C	-1.166651769	-0.022637966	0.243351028	0.174662157	0.270676278	1.78E-08	8.96E-08	41	45	45
ENSG00000154736.5	ADAMTS5	-1.166425256	-0.034353349	0.243442552	0.071513773	0.187873286	4.80E-06	1.38E-05	15	15	15
ENSG00000166743.5	ACSM1	-1.166300572	-0.030055342	0.243492942	0.091645634	0.093984674	0.001635116	0.002257564	32	34	34
ENSG00000167601.7	AXL	1.165348317	0.025327009	0.243878029	0.130617857	0.069419728	0.007165638	0.007918446	46	52	52
ENSG00000174871.6	CNIH2	-1.164702213	-0.018210099	0.244139553	0.191170237	0.130214567	0.000180722	0.000343876	39	49	49
ENSG00000109332.15	UBE2D3	1.164167639	0.048934473	0.244356082	0.029978854	0.039749764	0.043482709	0.034735993	12	16	16
ENSG00000091656.11	ZFHX4	1.163307747	0.016288228	0.244704664	0.493276374	0.158684647	3.08E-05	7.20E-05	108	136	136
ENSG00000080644.11	CHRNA3	1.163123502	0.085972318	0.244779398	0.010417657	0.045439195	0.030626211	0.026230947	5	7	7
ENSG00000175264.3	CHST1	-1.162498899	-0.02616803	0.245032872	0.103509993	0.054338007	0.017805937	0.017013715	28	29	29
ENSG00000066382.12	MPPED2	-1.162279305	-0.037673335	0.24512203	0.046961446	0.055339732	0.016756853	0.016164129	11	11	11
ENSG00000152578.8	GRIA4	-1.162127459	-0.044751339	0.245183695	0.048207118	0.068276637	0.007675829	0.008374965	12	13	13
ENSG00000174928.11	C3orf33	1.162053187	0.033127127	0.245213861	0.079925194	0.042361228	0.037003776	0.0305968	32	42	42
ENSG00000221926.7	TRIM16	1.161073742	0.000189679	0.245611912	0.120407169	0.082912304	0.003183998	0.00398963	36	45	45
ENSG00000245680.5	ZNF585B	-1.160595571	-0.033264418	0.245806407	0.065407426	0.152456015	4.55E-05	0.000101376	15	17	17
ENSG00000197081.8	IGF2R	-1.16017357	-0.060102354	0.245978146	0.055335543	0.047937276	0.026285195	0.023174736	16	23	23
ENSG00000160284.10	SPATC1L	1.15924177	0.025925604	0.24635765	0.124065562	0.263113518	3.03E-08	1.46E-07	18	19	19
ENSG00000130287.9	NCAN	-1.158767568	-0.024753414	0.24655094	0.100541527	0.079879563	0.003820773	0.004645834	32	33	33
ENSG00000010438.12	PRSS3	-1.15843988	-0.02201944	0.246684573	0.163943873	0.051213053	0.021527603	0.019743165	66	85	85
ENSG00000103226.13	NOMO3	1.158202763	0.034917582	0.246781301	0.036985745	0.078863765	0.004061327	0.004891418	15	26	26
ENSG00000133597.5	ADCK2	-1.157845929	-0.020112043	0.246926916	0.19309074	0.101829394	0.001018386	0.001508513	50	57	57
ENSG00000104885.13	DOT1L	1.157094455	0.0271482	0.247233772	0.116370967	0.149414777	5.51E-05	0.00012053	20	26	26
ENSG00000206549.8	PRSS50	-1.156419771	-0.086778741	0.247509498	0.026668746	0.037138881	0.051141315	0.039680126	13	15	15
ENSG00000107281.5	NPDC1	1.156198382	0.488072423	0.247600021	0.000276563	0.03644987	0.05338758	0.041005755	1	2	2
ENSG00000176020.7	AMIGO3	-1.155913454	-0.034995336	0.247716559	0.06012541	0.089726694	0.002113185	0.002826068	16	21	21
ENSG00000132932.12	ATP8A2	1.155695769	0.043119221	0.247805619	0.036963562	0.036498675	0.053225139	0.040928571	11	11	11
ENSG00000124466.8	LYPD3	-1.155330444	-0.032208904	0.247955133	0.142422493	0.071636486	0.006271189	0.007086422	69	87	87
ENSG00000197385.5	ZNF860	-1.154975099	-0.027234435	0.248100624	0.115962971	0.057525914	0.014679526	0.014520623	36	41	41
ENSG00000132600.12	PRMT7	1.153731206	0.014610946	0.248610386	0.37691889	0.310534479	9.74E-10	6.28E-09	40	45	45
ENSG00000188677.10	PARVB	1.153332446	0.025651373	0.248773958	0.102708113	0.210067377	1.13E-06	3.89E-06	14	16	16
ENSG00000157827.15	FMNL2	1.153268933	0.886380851	0.248800017	0.000105487	0.065555115	0.009042364	0.009611018	1	1	1
ENSG00000169242.7	EFNA1	1.153109753	0.024087816	0.248865339	0.113805693	0.164279833	2.17E-05	5.26E-05	13	16	16
ENSG00000141580.11	WDR45B	-1.152434708	-0.027083788	0.249142485	0.092728542	0.103866976	0.000900314	0.001361395	23	33	33
ENSG00000128699.9	ORMDL1	1.151043633	0.035419493	0.249714285	0.055705389	0.08251355	0.003261254	0.00407201	17	18	18
ENSG00000102678.6	FGF9	1.150553571	0.658876889	0.249915943	0.000201612	0.135247902	0.000132565	0.000262702	2	2	2
ENSG00000125991.14	ERGIC3	1.150391845	0.029866719	0.249982517	0.09024314	0.069728739	0.007033661	0.007789638	12	14	14
ENSG00000110435.7	PDHX	1.149881919	0.033137644	0.250192509	0.065783027	0.120245198	0.000332804	0.000579059	19	19	19
ENSG00000164466.8	SFXN1	1.149347834	0.067563664	0.250412581	0.016784722	0.035380515	0.057079718	0.043198021	8	10	10
ENSG00000196378.7	ZNF34	-1.148455021	-0.059250097	0.250780771	0.020101004	0.144357384	7.54E-05	0.000159019	3	6	6
ENSG00000176485.6	PLA2G16	1.147897028	0.01842664	0.251011075	0.208460044	0.245330269	1.04E-07	4.54E-07	30	36	36
ENSG00000197217.8	ENTPD4	1.147471764	0.035503001	0.251186696	0.066558478	0.051012743	0.021791574	0.019912976	13	13	13
ENSG00000117054.9	ACADM	-1.146915923	-0.025896641	0.251416371	0.111608377	0.354558824	3.27E-11	2.98E-10	34	40	40
ENSG00000111962.7	UST	-1.146821477	-0.019113547	0.251455411	0.224015642	0.239300058	1.58E-07	6.58E-07	65	71	71
ENSG00000164142.11	FAM160A1	-1.145612593	-0.020705805	0.251955484	0.152162037	0.386198583	2.48E-12	2.86E-11	34	40	40
ENSG00000107829.9	FBXW4	1.145505544	0.04486006	0.2519998	0.040152827	0.102225455	0.000994291	0.001480883	8	8	8
ENSG00000131849.10	ZNF132	1.144103564	0.049744112	0.25258069	0.031883254	0.154729911	3.95E-05	8.94E-05	9	13	13
ENSG00000168661.10	ZNF30	-1.14387208	-0.019283231	0.252676691	0.189336599	0.311389124	9.14E-10	5.95E-09	56	65	65
ENSG00000181444.8	ZNF467	1.143793686	0.044606156	0.252709209	0.038244415	0.066805099	0.008386723	0.009028081	15	15	15
ENSG00000106608.12	URGCP	1.143066172	0.036422366	0.253011118	0.046393231	0.050314588	0.022737658	0.020586052	20	24	24
ENSG00000040341.13	STAU2	1.14244383	0.074127613	0.253269581	0.018455073	0.039956296	0.042930029	0.034426658	16	16	16
ENSG00000135632.7	SMYD5	1.14091742	0.041063241	0.25390429	0.039747951	0.076704693	0.004624102	0.005457722	24	28	28
ENSG00000134020.6	PEBP4	1.140192283	0.02026152	0.254206202	0.182770296	0.20881097	1.22E-06	4.17E-06	37	42	42
ENSG00000221995.4	TIAF1	1.139389402	0.022665585	0.254540774	0.148767623	0.276482644	1.17E-08	6.16E-08	31	32	32
ENSG00000103423.9	DNAJA3	-1.139121427	-0.037114815	0.254652511	0.068988625	0.049479842	0.023923991	0.021429757	22	26	26
ENSG00000107372.8	ZFAND5	1.13836154	0.012537802	0.254969547	0.27381956	0.037984246	0.048518983	0.037961898	58	66	66
ENSG00000117475.9	BLZF1	1.13795187	0.03475094	0.25514058	0.063772799	0.062097175	0.011137791	0.011476145	21	24	24
ENSG00000135835.6	KIAA1614	1.137465068	0.029186413	0.255343919	0.100102024	0.102004098	0.001007687	0.001495169	22	24	24
ENSG00000141552.13	ANAPC11	1.13735812	0.091998916	0.255388607	0.00931652	0.063498321	0.010235409	0.010699059	10	14	14
ENSG00000138756.13	BMP2K	1.137348993	0.232301038	0.255392421	0.001403001	0.049003339	0.02462931	0.021961438	2	2	2
ENSG00000159167.7	STC1	-1.137265468	-0.016285836	0.255427326	0.241337698	0.057784726	0.014451518	0.014354367	47	57	57
ENSG00000168936.6	TMEM129	1.137211914	0.049316635	0.255449708	0.035887551	0.114765145	0.000464772	0.000778425	27	32	32
ENSG00000089116.3	LHX5	-1.137138181	-0.024756995	0.255480525	0.131690419	0.046229173	0.029179294	0.025217602	42	47	47
ENSG00000106261.12	ZKSCAN1	1.136599861	0.036796971	0.255705598	0.307795571	0.16334457	2.30E-05	5.53E-05	69	93	93
ENSG00000139675.10	HNRNPA1L2	1.136591266	0.021940229	0.255709193	0.126200973	0.120880976	0.000320132	0.000560872	43	49	49
ENSG00000144120.8	TMEM177	-1.135920942	-0.020840408	0.255989653	0.144690749	0.402531172	6.23E-13	8.07E-12	11	12	12
ENSG00000002919.10	SNX11	-1.135813116	-0.028363127	0.256034787	0.098197703	0.188314992	4.66E-06	1.34E-05	22	22	22
ENSG00000134508.8	CABLES1	1.13496203	0.023012679	0.256391228	0.144479981	0.142706448	8.36E-05	0.000173854	29	34	34
ENSG00000198087.7	CD2AP	-1.133711796	-0.048298164	0.25691546	0.034572893	0.145765105	6.91E-05	0.000147278	6	7	7
ENSG00000120370.8	GORAB	1.133232315	0.010079091	0.257116707	0.348096126	0.18195884	7.02E-06	1.93E-05	63	72	72
ENSG00000022556.11	NLRP2	-1.133149052	-0.078615909	0.257151665	0.013904587	0.06721984	0.008179918	0.008837735	2	2	2
ENSG00000145388.10	METTL14	1.133146882	0.040278166	0.257152576	0.038087744	0.032679758	0.067644741	0.049570978	16	17	17
ENSG00000183258.7	DDX41	1.132437404	0.020674365	0.257450587	0.190726285	0.097624594	0.001312833	0.001875554	41	54	54
ENSG00000038002.4	AGA	-1.131725483	-0.017816648	0.257749865	0.201504585	0.348706592	5.20E-11	4.56E-10	34	37	37
ENSG00000129450.4	SIGLEC9	-1.131672287	-0.014861827	0.257772237	0.190305098	0.122873586	0.000283429	0.00050482	46	49	49
ENSG00000228146.2	CASP16	-1.131326378	-0.277744527	0.257917746	0.000875458	0.037259488	0.050758351	0.039460887	6	9	9
ENSG00000189337.11	KAZN	1.130813876	0.039655739	0.258133438	0.049548498	0.033707388	0.063401441	0.046996118	22	22	22
ENSG00000156875.9	HIAT1	-1.130785017	-0.063264133	0.258145588	0.025568006	0.045891707	0.029788625	0.025643958	11	16	16
ENSG00000177076.4	ACER2	-1.130283615	-0.042378662	0.258356736	0.041403709	0.096248242	0.001426507	0.002007148	17	18	18
ENSG00000124160.7	NCOA5	-1.130178743	-0.022739606	0.258400915	0.131076198	0.063657634	0.010137587	0.010609681	51	52	52
ENSG00000057468.6	MSH4	1.129212528	0.037890813	0.25880819	0.05907911	0.130083848	0.000182179	0.000346091	23	25	25
ENSG00000121542.7	SEC22A	1.128737917	0.020869217	0.259008409	0.156605048	0.207449803	1.34E-06	4.52E-06	24	28	28
ENSG00000187144.7	SPATA21	1.12869006	0.030311355	0.259028604	0.077530642	0.177004227	9.65E-06	2.56E-05	20	35	35
ENSG00000164039.10	BDH2	1.127981338	0.025311046	0.259327801	0.085827186	0.06401871	0.009919347	0.010411754	38	50	50
ENSG00000168792.4	ABHD15	-1.127386384	-0.02545111	0.259579154	0.106934522	0.062504615	0.010867416	0.011245457	24	33	33
ENSG00000185122.6	HSF1	1.12672654	0.017694229	0.259858118	0.248759679	0.056207358	0.015898953	0.015497166	55	78	78
ENSG00000172059.6	KLF11	1.126387779	0.009846889	0.260001417	0.725045029	0.124156874	0.000262029	0.000470256	142	166	166
ENSG00000143198.8	MGST3	1.126250773	0.028550997	0.260059388	0.086643379	0.066346954	0.008621287	0.009244012	23	34	34
ENSG00000138111.10	TMEM180	-1.125741851	-0.020243457	0.260274804	0.17060754	0.327054434	2.79E-10	2.05E-09	22	22	22
ENSG00000183066.10	WBP2NL	1.125657211	0.025011481	0.260310642	0.127520923	0.146449314	6.62E-05	0.000141911	36	43	43
ENSG00000131711.10	MAP1B	1.124899894	0.038193833	0.260631457	0.047571265	0.133504525	0.000147604	0.000288783	8	9	9
ENSG00000148396.14	SEC16A	-1.124143272	-0.056281446	0.260952251	0.024556797	0.038875398	0.045905401	0.03629431	15	16	16
ENSG00000149557.8	FEZ1	-1.123837058	-0.014599893	0.261082157	0.258476489	0.236200598	1.95E-07	8.06E-07	57	63	63
ENSG00000204252.8	HLA-DOA	-1.123507589	-0.019700247	0.261221979	0.162134628	0.212538715	9.55E-07	3.35E-06	23	29	29
ENSG00000164588.4	HCN1	-1.123363572	-0.216065109	0.261283114	0.001716303	0.035106734	0.058067222	0.043804785	2	5	5
ENSG00000110172.7	CHORDC1	-1.122890623	-0.023009389	0.261483951	0.159891058	0.058788805	0.013600335	0.013647755	35	56	56
ENSG00000164465.14	DCBLD1	-1.122772244	-0.016875552	0.261534237	0.252202241	0.086738223	0.002529552	0.003278769	65	77	77
ENSG00000166823.5	MESP1	1.122187433	0.056902269	0.261782755	0.021196401	0.062501592	0.010869397	0.011245457	30	32	32
ENSG00000134121.5	CHL1	1.122144861	0.015668297	0.261800852	0.297291878	0.247777046	8.81E-08	3.89E-07	55	67	67
ENSG00000143631.10	FLG	-1.121723523	-0.029784852	0.261980012	0.064551023	0.068723611	0.007472127	0.008198227	15	15	15
ENSG00000161217.7	PCYT1A	-1.120409202	-0.035570401	0.262539425	0.064248496	0.131230319	0.000169781	0.000325864	28	39	39
ENSG00000108826.11	MRPL27	1.120399493	0.025011871	0.262543561	0.112794502	0.245853729	1.01E-07	4.39E-07	13	13	13
ENSG00000165443.7	PHYHIPL	1.119947586	0.044404741	0.262736098	0.034239128	0.098397507	0.001252993	0.001805378	32	39	39
ENSG00000133812.10	SBF2	-1.118516578	-0.044206383	0.26334643	0.025479361	0.051839132	0.020723343	0.019182319	9	9	9
ENSG00000125779.17	PANK2	-1.118448526	-0.011546277	0.263375479	0.497416477	0.173373847	1.22E-05	3.16E-05	108	128	128
ENSG00000183773.11	AIFM3	1.118373505	0.02245222	0.263407505	0.180009679	0.195172159	2.99E-06	9.15E-06	43	68	68
ENSG00000213780.6	GTF2H4	-1.118145086	-0.013009014	0.263505033	0.147331272	0.112426862	0.000535785	0.000877826	43	73	73
ENSG00000162039.10	MEIOB	-1.117989778	-0.057814219	0.263571359	0.020867554	0.080376791	0.003708267	0.00453569	14	17	17
ENSG00000124787.9	RPP40	1.117938449	0.023313685	0.263593282	0.130772997	0.043000375	0.03557547	0.029707454	51	52	52
ENSG00000175084.7	DES	1.117346811	0.035849809	0.263846068	0.048224548	0.047582755	0.026860717	0.023600139	18	22	22
ENSG00000101327.4	PDYN	-1.116718213	-0.02590514	0.264114828	0.105146799	0.056445918	0.015670963	0.015317146	49	50	50
ENSG00000228716.2	DHFR	1.116661306	0.012457669	0.264139168	0.436420239	0.429507231	5.85E-14	9.68E-13	77	86	86
ENSG00000107736.15	CDH23	1.116528518	0.018477516	0.26419597	0.24480156	0.034583891	0.060003047	0.044986904	64	70	70
ENSG00000059691.7	PET112	1.116486087	0.35013071	0.264214122	0.000739392	0.09328971	0.001705055	0.002336797	2	5	5
ENSG00000164749.7	HNF4G	1.115867985	0.035792408	0.264478648	0.053183665	0.065654012	0.008988663	0.009574078	18	22	22
ENSG00000134285.6	FKBP11	1.114900112	0.02391008	0.264893229	0.130953523	0.261516407	3.39E-08	1.62E-07	17	21	21
ENSG00000189157.9	FAM47E	-1.114154995	-0.036281131	0.265212699	0.056851964	0.059879241	0.012733213	0.012905752	44	47	47
ENSG00000178096.8	BOLA1	-1.113771103	-0.03899417	0.265377397	0.038590023	0.053444012	0.018798406	0.017733829	13	20	20
ENSG00000188211.4	NCR3LG1	1.113377954	0.047306935	0.265546139	0.030906061	0.051014577	0.021789142	0.019912976	22	26	26
ENSG00000125945.10	ZNF436	1.11306914	0.0594885	0.265678736	0.022473354	0.044837468	0.031777549	0.027072838	10	10	10
ENSG00000068781.16	STON1-GTF2A1L	-1.112997485	-0.012819736	0.26570951	0.420701209	0.318772106	5.24E-10	3.58E-09	70	73	73
ENSG00000157992.8	KRTCAP3	1.112396279	0.044908268	0.265967804	0.037142069	0.034168553	0.06158895	0.045971305	9	9	9
ENSG00000136485.10	DCAF7	1.111631409	0.091613779	0.266296662	0.011839894	0.040014658	0.042775175	0.034325822	4	4	4
ENSG00000060558.3	GNA15	1.110835843	0.018943526	0.266639015	0.186635226	0.651173993	7.79E-25	2.14E-22	46	56	56
ENSG00000107551.16	RASSF4	-1.110775021	-0.028495391	0.266665201	0.086952629	0.060005716	0.012636323	0.012840663	28	33	33
ENSG00000163517.10	HDAC11	1.110741391	0.019245763	0.26667968	0.232888754	0.182783879	6.66E-06	1.85E-05	50	53	53
ENSG00000149541.5	B3GAT3	-1.109868475	-0.018385181	0.267055707	0.207870981	0.23922752	1.59E-07	6.61E-07	40	47	47
ENSG00000188643.6	S100A16	1.109792168	0.018797947	0.267088595	0.218306964	0.400716186	7.27E-13	9.39E-12	36	43	43
ENSG00000166228.4	PCBD1	1.107897235	0.035637198	0.2679062	0.083901484	0.056374529	0.015738839	0.015366505	45	45	45
ENSG00000128563.9	PRKRIP1	-1.107817722	-0.040346685	0.267940545	0.050125428	0.055769705	0.016325988	0.015843345	24	26	26
ENSG00000115271.6	GCA	-1.107454378	-0.020170689	0.268097527	0.236492886	0.310416644	9.83E-10	6.31E-09	29	29	29
ENSG00000086506.2	HBQ1	1.105399929	0.021555382	0.268986334	0.196891754	0.152154236	4.64E-05	0.000102982	48	58	58
ENSG00000133401.11	PDZD2	-1.105235472	-0.010324269	0.26905757	0.703001549	0.078334647	0.004192566	0.005018722	147	159	159
ENSG00000125337.12	KIF25	-1.10428714	-0.026906123	0.269468599	0.106489262	0.372064997	7.97E-12	8.19E-11	27	32	32
ENSG00000169885.5	CALML6	1.104211094	0.059658458	0.269501578	0.015000336	0.051671691	0.020935394	0.019325306	5	8	8
ENSG00000198169.4	ZNF251	-1.104019252	-0.019751709	0.269584786	0.177511381	0.319171105	5.09E-10	3.48E-09	13	14	14
ENSG00000186792.11	HYAL3	1.103575938	0.015204578	0.269777134	0.271972361	0.415519117	2.02E-13	3.03E-12	11	13	13
ENSG00000157978.7	LDLRAP1	1.103063716	0.02516806	0.269999496	0.11331311	0.206420651	1.43E-06	4.81E-06	13	16	16
ENSG00000015413.5	DPEP1	-1.102998126	-0.023711789	0.270027979	0.139155433	0.041618479	0.038738095	0.031726765	44	62	62
ENSG00000004777.14	ARHGAP33	-1.10254666	-0.039371689	0.270224085	0.053700587	0.075115462	0.005087607	0.005938961	41	48	48
ENSG00000108272.9	DHRS11	1.10213553	0.020892458	0.270402755	0.173514332	0.140241139	9.74E-05	0.000199668	40	46	46
ENSG00000174194.11	AGAP8	-1.101875767	-0.016740357	0.270515685	0.249351155	0.318267116	5.45E-10	3.69E-09	48	58	58
ENSG00000144306.9	SCRN3	-1.10102754	-0.024350238	0.270884671	0.092773324	0.098306959	0.001259861	0.001811644	24	24	24
ENSG00000115641.14	FHL2	-1.100926309	-0.033499023	0.270928731	0.078221275	0.048242947	0.025799098	0.022814727	27	27	27
ENSG00000037042.8	TUBG2	1.100143516	0.038509676	0.271269596	0.045986155	0.188754669	4.53E-06	1.31E-05	23	30	30
ENSG00000233276.2	GPX1	-1.10013563	-0.021124313	0.271273032	0.139216774	0.215715252	7.74E-07	2.75E-06	39	43	43
ENSG00000138764.9	CCNG2	1.100004689	0.026107292	0.271330079	0.105240176	0.163732806	2.24E-05	5.41E-05	65	68	68
ENSG00000163975.7	MFI2	-1.100001009	-0.024920804	0.271331682	0.148541523	0.042922845	0.035745658	0.029842525	69	82	82
ENSG00000173540.8	GMPPB	-1.099627319	-0.033694107	0.271494534	0.055771815	0.195706948	2.89E-06	8.87E-06	13	19	19
ENSG00000180257.8	ZNF816	1.099167865	0.016542809	0.271694853	0.239652878	0.093540205	0.001679509	0.002308047	78	99	99
ENSG00000095321.12	CRAT	-1.0988676	-0.017975119	0.271825821	0.200212809	0.273923999	1.41E-08	7.23E-08	46	46	46
ENSG00000168944.11	CEP120	1.096712711	0.086643598	0.272766998	0.010379875	0.055992004	0.016107649	0.015672897	4	6	6
ENSG00000146729.5	GBAS	1.09628186	0.065241333	0.272955445	0.020171518	0.086562063	0.002556502	0.003308852	16	25	25
ENSG00000176593.3	CTD-2368P22.1	1.095185315	0.016392721	0.273435458	0.152375126	0.086040656	0.002637959	0.003395644	41	48	48
ENSG00000197747.4	S100A10	1.095138589	0.058879908	0.273455925	0.01897739	0.040562859	0.041348496	0.03339307	8	8	8
ENSG00000140400.10	MAN2C1	1.092473965	0.043540775	0.274624828	0.034448222	0.05791979	0.014333956	0.014250525	13	16	16
ENSG00000105698.11	USF2	-1.092096815	-0.021566889	0.274790549	0.117334875	0.121762121	0.000303355	0.000534308	32	38	38
ENSG00000113163.11	COL4A3BP	1.091915679	0.053850679	0.274870166	0.019236835	0.035366447	0.057130029	0.043226848	8	8	8
ENSG00000188493.10	C19orf54	1.091340513	0.017350832	0.275123077	0.224117909	0.286781199	5.59E-09	3.12E-08	28	38	38
ENSG00000156050.4	FAM161B	1.090763688	0.019731995	0.275376878	0.229653139	0.172802148	1.26E-05	3.27E-05	45	50	50
ENSG00000164970.10	FAM219A	1.090711117	0.156552443	0.275400017	0.002873223	0.045744908	0.030057741	0.025831624	1	2	2
ENSG00000136603.9	SKIL	-1.089458231	-0.019207044	0.275951864	0.152339675	0.080498022	0.003681341	0.004513683	46	57	57
ENSG00000225921.2	NOL7	1.089297829	0.031805712	0.27602257	0.072431664	0.148445617	5.85E-05	0.000127016	26	28	28
ENSG00000139508.10	SLC46A3	1.089069361	0.019469097	0.2761233	0.194484264	0.232431054	2.52E-07	1.01E-06	39	41	41
ENSG00000132467.2	UTP3	-1.088727156	-0.059272008	0.276274223	0.020233068	0.042217242	0.037333619	0.030804726	3	3	3
ENSG00000164733.16	CTSB	-1.087725071	-0.026471292	0.276716496	0.088172319	0.093376648	0.001696145	0.00232639	19	22	22
ENSG00000100726.10	TELO2	1.086514537	0.079970457	0.277251413	0.010700436	0.069357414	0.007192552	0.007938267	10	12	12
ENSG00000133313.10	CNDP2	-1.085654087	-0.017023744	0.277632061	0.281832802	0.381647059	3.62E-12	4.03E-11	38	42	42
ENSG00000108465.10	CDK5RAP3	-1.085635638	-0.016421795	0.277640226	0.262681786	0.35990915	2.13E-11	2.03E-10	40	46	46
ENSG00000169715.10	MT1E	-1.084485501	-0.034581204	0.278149592	0.058726031	0.144778998	7.35E-05	0.000155371	10	10	10
ENSG00000077348.4	EXOSC5	1.084102726	0.016691973	0.278319254	0.193669991	0.163402963	2.29E-05	5.52E-05	32	39	39
ENSG00000169330.4	KIAA1024	1.083740154	0.05394354	0.278480027	0.024732255	0.086154652	0.002619932	0.003376124	16	17	17
ENSG00000233232.2	NPIPB7	1.08355164	0.15180776	0.278563643	0.002964341	0.060442503	0.012307398	0.01254245	10	17	17
ENSG00000002549.8	LAP3	-1.083139515	-0.095244352	0.278746502	0.008383189	0.040435155	0.041676385	0.033588855	8	9	9
ENSG00000162300.7	ZFPL1	1.082413692	0.031842043	0.279068747	0.064130409	0.041995881	0.037846629	0.031162599	20	21	21
ENSG00000106392.6	C1GALT1	-1.081808885	-0.019182614	0.279337458	0.189943121	0.260629765	3.61E-08	1.71E-07	36	39	39
ENSG00000077616.6	NAALAD2	1.080618382	0.024818344	0.279866902	0.12208945	0.171424807	1.38E-05	3.54E-05	34	46	46
ENSG00000069188.12	SDK2	-1.079163054	-0.043379082	0.280515046	0.039139416	0.108734744	0.000670399	0.001064361	13	13	13
ENSG00000151704.11	KCNJ1	-1.078653225	-0.209718558	0.280742345	0.00125522	0.059176058	0.013285758	0.013358609	2	2	2
ENSG00000143416.16	SELENBP1	-1.078570226	-0.022610187	0.28077936	0.120574101	0.211956156	9.93E-07	3.46E-06	11	12	12
ENSG00000221838.5	AP4M1	-1.077998765	-0.038060323	0.281034307	0.047093223	0.049053947	0.024553403	0.021910323	13	14	14
ENSG00000148143.8	ZNF462	1.077553574	0.017926167	0.28123303	0.177633291	0.11351647	0.000501448	0.000830415	63	68	68
ENSG00000113569.11	NUP155	1.077398964	0.039580855	0.281302067	0.039381161	0.044412586	0.03261719	0.027601031	11	12	12
ENSG00000240694.4	PNMA2	1.076764757	0.017171831	0.281585374	0.257220411	0.385781196	2.57E-12	2.94E-11	21	23	23
ENSG00000120699.8	EXOSC8	-1.076386067	-0.013591051	0.281754631	0.462514618	0.132738575	0.000154734	0.000300735	92	115	115
ENSG00000119636.11	CCDC176	1.076258144	0.054000205	0.281811823	0.02384336	0.050612764	0.022328577	0.020276385	4	5	5
ENSG00000166246.9	C16orf71	-1.075681203	-0.03435471	0.282069857	0.058515862	0.033621808	0.063743901	0.047180076	17	21	21
ENSG00000255374.1	TAS2R43	1.074771922	0.014776355	0.282476854	0.264094816	0.515809994	1.35E-17	4.84E-16	43	47	47
ENSG00000103241.5	FOXF1	1.074265731	0.055590993	0.2827036	0.033166896	0.104825147	0.000849592	0.001294558	17	22	22
ENSG00000141519.10	CCDC40	1.074183038	0.013716877	0.282740653	0.453150264	0.490393953	1.84E-16	5.20E-15	62	69	69
ENSG00000114030.8	KPNA1	1.074065478	0.013459835	0.282793336	0.349555853	0.203743112	1.71E-06	5.61E-06	77	84	84
ENSG00000171931.8	FBXW10	1.074023346	0.027435261	0.282812218	0.080851703	0.353492495	3.56E-11	3.20E-10	14	19	19
ENSG00000121068.9	TBX2	1.07354077	0.047226106	0.283028557	0.026123553	0.053810575	0.018384846	0.017411658	18	24	24
ENSG00000136628.13	EPRS	1.072842505	0.016392606	0.283341786	0.359410034	0.177876229	9.13E-06	2.44E-05	111	125	125
ENSG00000171885.9	AQP4	-1.071948576	-0.030247624	0.28374313	0.066168903	0.081412419	0.003484449	0.004315655	14	17	17
ENSG00000101307.11	SIRPB1	1.071862773	0.027939624	0.283781673	0.101222922	0.380356629	4.03E-12	4.43E-11	11	13	13
ENSG00000178750.2	STX19	1.07106986	0.026367465	0.284138019	0.090279958	0.057349474	0.014837048	0.014637729	23	31	31
ENSG00000204677.6	FAM153C	-1.07039263	-0.036823804	0.284442615	0.05526307	0.272649586	1.54E-08	7.84E-08	16	23	23
ENSG00000152128.13	TMEM163	1.070140684	0.023348149	0.284555989	0.118540707	0.053437026	0.01880638	0.017734905	29	30	30
ENSG00000180398.7	MCFD2	-1.069716636	-0.014438443	0.284746876	0.334562898	0.312817296	8.21E-10	5.39E-09	47	49	49
ENSG00000028203.13	VEZT	-1.06952368	-0.017523901	0.284833764	0.24532726	0.127524074	0.000213182	0.00039647	56	61	61
ENSG00000110063.4	DCPS	1.068745411	0.02055235	0.285184403	0.122695567	0.085077271	0.002795333	0.00357222	31	35	35
ENSG00000124120.6	TTPAL	-1.067724331	-0.035720685	0.28564488	0.045702834	0.057587445	0.01462499	0.014475972	19	20	20
ENSG00000224051.2	GLTPD1	-1.066287298	-0.074702078	0.28629379	0.018802896	0.038616076	0.046650516	0.036809376	23	35	35
ENSG00000162437.10	RAVER2	-1.066199156	-0.020034209	0.286333623	0.170557942	0.330900852	2.08E-10	1.57E-09	13	13	13
ENSG00000119900.7	OGFRL1	-1.065034991	-0.02551579	0.286860095	0.109063005	0.329839176	2.26E-10	1.69E-09	7	9	9
ENSG00000241043.1	GVQW1	-1.064563898	-0.031330901	0.287073324	0.059475674	0.043059831	0.035445521	0.029631432	15	16	16
ENSG00000078674.13	PCM1	-1.06383781	-0.013119691	0.28740218	0.343498745	0.474169066	9.10E-16	2.18E-14	46	49	49
ENSG00000237765.2	FAM200B	1.063709408	0.036470843	0.287460361	0.049230918	0.116205685	0.000425752	0.000721959	12	13	13
ENSG00000119630.9	PGF	1.062960148	0.687710611	0.287800024	0.000132066	0.092706096	0.001766081	0.002411093	1	1	1
ENSG00000141076.13	CIRH1A	1.062843221	0.03923178	0.287853055	0.094601058	0.20412746	1.66E-06	5.50E-06	9	10	10
ENSG00000124226.7	RNF114	1.062801761	0.023247734	0.287871861	0.106366294	0.170821749	1.43E-05	3.66E-05	21	21	21
ENSG00000106819.7	ASPN	-1.062454182	-0.05022419	0.288029548	0.019988764	0.046748885	0.02826576	0.024596361	9	10	10
ENSG00000076685.14	NT5C2	1.062340951	0.026975961	0.28808093	0.097836127	0.079533432	0.003901098	0.004724176	32	36	36
ENSG00000067082.10	KLF6	-1.062102495	-0.01148048	0.288189158	0.387883857	0.047984016	0.026210264	0.023119792	79	92	92
ENSG00000101290.9	CDS2	1.061854959	0.011341707	0.288301535	0.355150798	0.30445766	1.53E-09	9.39E-09	102	113	113
ENSG00000136630.11	HLX	-1.060956484	-0.034432793	0.288709678	0.070201241	0.110210947	0.000612965	0.000986908	15	16	16
ENSG00000151812.10	SLC35F4	1.060677315	0.033216926	0.288836573	0.062722946	0.059923114	0.012699518	0.012875289	32	34	34
ENSG00000142675.13	CNKSR1	1.060444668	0.01269481	0.28894235	0.369105391	0.519820269	8.87E-18	3.30E-16	58	73	73
ENSG00000039523.13	FAM65A	1.060423371	0.067830498	0.288952034	0.026723465	0.039410696	0.044406081	0.03537775	17	21	21
ENSG00000204659.4	CBY3	-1.060161084	-0.061879457	0.289071322	0.014847745	0.037808415	0.049052659	0.038320121	11	22	22
ENSG00000168807.12	SNTB2	1.059979129	0.019559425	0.289154095	0.152446879	0.13188301	0.0001631	0.000314062	43	50	50
ENSG00000163683.7	SMIM14	-1.05955191	-0.054278313	0.289348502	0.022719431	0.045408006	0.030684824	0.026268427	13	14	14
ENSG00000007944.10	MYLIP	1.058370835	0.016397513	0.28988641	0.203060751	0.063395278	0.010299186	0.01075619	52	57	57
ENSG00000103126.10	AXIN1	-1.057988226	-0.022220651	0.29006081	0.142457158	0.093161228	0.001718307	0.002352225	24	34	34
ENSG00000054611.9	TBC1D22A	-1.057852196	-0.020602607	0.290122832	0.258363901	0.107799016	0.000709535	0.001112022	71	78	78
ENSG00000180210.10	F2	-1.056621713	-0.030994479	0.290684267	0.075101859	0.077348485	0.004448587	0.005275208	10	12	12
ENSG00000155957.12	TMBIM4	1.05570335	0.035566722	0.291103766	0.055394112	0.163335848	2.30E-05	5.53E-05	27	35	35
ENSG00000140386.8	SCAPER	-1.054994047	-0.026071329	0.291428047	0.116859417	0.152777145	4.46E-05	9.96E-05	35	40	40
ENSG00000164081.8	TEX264	1.05488753	0.082092853	0.291476766	0.01449299	0.073504115	0.005605076	0.006447734	10	14	14
ENSG00000124772.7	CPNE5	-1.054849644	-0.018402043	0.291494096	0.106882233	0.069887356	0.006966867	0.00773083	35	43	43
ENSG00000102572.10	STK24	-1.054196486	-0.038556915	0.291792969	0.068285219	0.12620151	0.000231189	0.000423502	9	10	10
ENSG00000012963.9	UBR7	1.053958387	0.042448864	0.291901969	0.038580243	0.058643693	0.013720143	0.013747063	12	13	13
ENSG00000100813.10	ACIN1	1.053328443	0.070411788	0.292190487	0.014106379	0.033999075	0.062248639	0.046375637	4	4	4
ENSG00000130635.11	COL5A1	1.05249731	0.039349757	0.292571444	0.04562736	0.062195265	0.011072085	0.011425083	11	13	13
ENSG00000118855.14	MFSD1	-1.052446798	-0.03770075	0.292594607	0.049359849	0.050154414	0.022960552	0.020740078	25	29	29
ENSG00000103415.7	HMOX2	1.05198978	0.04654055	0.292804239	0.032785549	0.064580962	0.009588893	0.010121964	9	9	9
ENSG00000084207.11	GSTP1	1.051942843	0.04719275	0.292825774	0.031958315	0.163384149	2.29E-05	5.52E-05	14	21	21
ENSG00000228008.1	CTD-2330K9.3	1.051720484	0.042649981	0.29292781	0.067006444	0.051881594	0.020669917	0.01915021	12	18	18
ENSG00000116062.10	MSH6	-1.051641249	-0.029817008	0.292964175	0.065608409	0.034608935	0.059908799	0.044950594	27	28	28
ENSG00000165271.12	NOL6	1.051388452	0.017489266	0.293080217	0.19352669	0.386719429	2.37E-12	2.74E-11	18	21	21
ENSG00000162994.11	CLHC1	-1.051199431	-0.033309519	0.293167005	0.057832285	0.072053618	0.006115844	0.006940494	20	21	21
ENSG00000151893.10	CACUL1	1.051139839	0.011213119	0.293194369	0.52171874	0.280297506	8.93E-09	4.81E-08	120	133	133
ENSG00000108947.4	EFNB3	-1.051005657	-0.029112214	0.293255992	0.063395345	0.106070723	0.000787872	0.001217532	17	17	17
ENSG00000023171.10	GRAMD1B	-1.050990953	-0.032677387	0.293262745	0.045161881	0.043234905	0.035065707	0.029351064	20	21	21
ENSG00000154319.10	FAM167A	-1.050645256	-0.021931917	0.293421547	0.11957919	0.061959369	0.011230765	0.011558476	45	51	51
ENSG00000162714.8	ZNF496	1.050492759	0.018596871	0.293491618	0.14112883	0.155414018	3.78E-05	8.60E-05	65	83	83
ENSG00000141434.7	MEP1B	-1.050322826	-0.037279053	0.293569714	0.04213902	0.038954205	0.045681416	0.036165722	29	31	31
ENSG00000137462.6	TLR2	-1.050046956	-0.016966364	0.293696524	0.186297221	0.057105731	0.015057478	0.014814316	46	54	54
ENSG00000150787.3	PTS	-1.050041205	-0.073871128	0.293699169	0.024336532	0.040806804	0.040729537	0.033020045	12	13	13
ENSG00000168924.10	LETM1	1.050039411	0.708080974	0.293699994	0.000145217	0.076708889	0.004622936	0.005457722	1	1	1
ENSG00000095203.10	EPB41L4B	1.049971768	0.014522196	0.293731093	0.277336067	0.112212767	0.000542801	0.000886856	80	92	92
ENSG00000112299.7	VNN1	1.049387097	0.66286269	0.293999994	0.000139893	0.059260453	0.013218183	0.013305156	1	1	1
ENSG00000107890.12	ANKRD26	1.04895865	0.024334913	0.29419715	0.120475508	0.139497757	0.000101955	0.000208706	26	27	27
ENSG00000143466.9	IKBKE	1.047596245	0.05083119	0.294824668	0.020712112	0.075042108	0.00511009	0.005957769	9	12	12
ENSG00000186448.10	ZNF197	-1.04743278	-0.901326157	0.29490002	0.000139785	0.071212116	0.00643329	0.007228849	1	1	1
ENSG00000130811.6	EIF3G	-1.047200414	-0.047939096	0.295007154	0.025945029	0.036668132	0.052665103	0.040586066	13	16	16
ENSG00000111684.6	LPCAT3	-1.047131716	-0.050350239	0.295038833	0.02864214	0.095908213	0.001456066	0.00204386	14	47	47
ENSG00000189269.8	C22orf43	1.047118591	0.031826818	0.295044886	0.065165351	0.208893133	1.22E-06	4.15E-06	16	18	18
ENSG00000127948.9	POR	1.046787441	0.024507534	0.295197624	0.099163529	0.115164427	0.000453615	0.00076299	28	47	47
ENSG00000133983.10	COX16	-1.046674575	-0.022650843	0.295249694	0.137263058	0.080797676	0.003615624	0.004450074	66	73	73
ENSG00000159788.14	RGS12	1.046604623	0.025248351	0.295281969	0.102951901	0.054753635	0.017362802	0.016662311	29	39	39
ENSG00000156983.11	BRPF1	-1.046588356	-0.034286696	0.295289475	0.052930621	0.064915959	0.009397297	0.00993454	23	24	24
ENSG00000168491.5	CCDC110	-1.046301401	-0.040668943	0.295421899	0.045301288	0.076939273	0.004559361	0.005390303	8	8	8
ENSG00000186994.7	KANK3	1.04626622	0.020480066	0.295438137	0.149374198	0.309717001	1.04E-09	6.58E-09	29	32	32
ENSG00000065665.16	SEC61A2	1.046218271	0.021002186	0.295460269	0.129643339	0.37409919	6.74E-12	7.06E-11	22	23	23
ENSG00000166862.6	CACNG2	1.046131769	0.012076839	0.2955002	0.398030298	0.09321707	0.001712535	0.002345231	84	96	96
ENSG00000010379.11	SLC6A13	-1.045880597	-0.019555156	0.295616164	0.14695338	0.049115996	0.024460663	0.02186618	53	57	57
ENSG00000106459.10	NRF1	1.045448712	0.022553011	0.295815633	0.111774381	0.121063661	0.00031658	0.000555199	31	34	34
ENSG00000197142.6	ACSL5	-1.044519505	-0.017024486	0.2962451	0.185617732	0.112295988	0.000540063	0.000884016	40	45	45
ENSG00000138018.13	EPT1	-1.044400811	-0.297609445	0.296299988	0.000513048	0.06408903	0.009877398	0.010376961	1	1	1
ENSG00000130177.10	CDC16	1.04435234	0.056522027	0.296322405	0.020925538	0.032980671	0.06637214	0.048768534	10	10	10
ENSG00000116106.7	EPHA4	-1.0425996	-0.048023403	0.297133775	0.033633314	0.048878151	0.024818108	0.022096521	17	18	18
ENSG00000165379.9	LRFN5	1.042015452	0.022659611	0.297404515	0.139282447	0.13313454	0.000151007	0.000294462	26	28	28
ENSG00000196155.8	PLEKHG4	1.041871819	0.068650332	0.297471111	0.013916545	0.048763527	0.024992272	0.02222905	8	11	11
ENSG00000162878.8	PKDCC	1.040265464	0.00805006	0.298216585	0.75247595	0.227228922	3.58E-07	1.40E-06	133	154	154
ENSG00000104783.7	KCNN4	-1.039157875	-0.023444242	0.298731318	0.144614852	0.149755171	5.39E-05	0.000118291	35	43	43
ENSG00000134215.11	VAV3	1.038380825	0.022681068	0.299092793	0.141047554	0.069090537	0.007308969	0.008044166	60	61	61
ENSG00000133816.9	MICAL2	1.037550483	0.014603109	0.299479381	0.363651012	0.452817518	6.94E-15	1.33E-13	44	51	51
ENSG00000175928.5	LRRN1	1.037538531	0.056431568	0.299484948	0.020103928	0.067264188	0.00815811	0.008819561	3	3	3
ENSG00000065060.12	UHRF1BP1	-1.03740869	-0.029921991	0.29954543	0.055708743	0.163058996	2.34E-05	5.61E-05	14	18	18
ENSG00000196700.3	ZNF512B	-1.03716285	-0.046653451	0.299659968	0.028926854	0.06295008	0.010579372	0.01099686	18	22	22
ENSG00000108961.9	RANGRF	-1.036665122	-0.02213175	0.299891952	0.117723504	0.143135927	8.14E-05	0.000170429	36	39	39
ENSG00000105976.10	MET	-1.035508287	-0.031793964	0.300431598	0.063115983	0.085296984	0.002758637	0.00352915	24	24	24
ENSG00000243709.1	LEFTY1	1.035419136	0.019014058	0.300473213	0.149727341	0.150211032	5.24E-05	0.00011534	33	36	36
ENSG00000196796.4	CTB-134H23.2	-1.035214999	-0.030397871	0.300568516	0.074511443	0.088376179	0.002292138	0.003016354	27	40	40
ENSG00000168152.8	THAP9	-1.033649564	-0.279014697	0.30130002	0.001192329	0.039179998	0.045045922	0.035753032	1	1	1
ENSG00000114744.4	COMMD2	1.033053511	0.01642582	0.301578857	0.21799737	0.173788078	1.18E-05	3.09E-05	65	74	74
ENSG00000142252.6	GEMIN7	-1.032759793	-0.020017413	0.301716324	0.133908302	0.108667948	0.00067312	0.001067244	39	48	48
ENSG00000167635.7	ZNF146	-1.032271036	-0.044624521	0.301945166	0.028318438	0.097965542	0.001286094	0.001844057	27	27	27
ENSG00000156171.10	DRAM2	-1.032068284	-0.015955361	0.30204013	0.212460561	0.400329177	7.52E-13	9.67E-12	11	11	11
ENSG00000142515.10	KLK3	1.031949807	0.014057495	0.302095632	0.271283213	0.102151624	0.000998739	0.001485007	67	77	77
ENSG00000198231.8	DDX42	1.031648645	0.04751296	0.302236743	0.033238326	0.102710277	0.000965565	0.001446352	12	15	15
ENSG00000157823.12	AP3S2	1.031377665	0.01758781	0.302363751	0.175382582	0.171269247	1.39E-05	3.57E-05	57	63	63
ENSG00000048740.13	CELF2	1.030673732	0.021408271	0.302693847	0.131216641	0.06754897	0.008019455	0.008693578	47	51	51
ENSG00000170915.8	PAQR8	-1.030362856	-0.020124353	0.302839703	0.187939372	0.193471767	3.34E-06	1.01E-05	40	44	44
ENSG00000163728.6	TTC14	1.030156301	0.021020864	0.30293664	0.092157731	0.146383381	6.65E-05	0.000142322	18	19	19
ENSG00000105750.10	ZNF85	-1.029399342	-0.048222696	0.303292058	0.023611647	0.05865583	0.013710083	0.013742291	64	67	67
ENSG00000188710.1	QRFP	1.029034167	0.062402491	0.30346362	0.014767603	0.0879925	0.002345678	0.003076851	3	5	5
ENSG00000130755.8	GMFG	-1.028402334	-0.076429277	0.303760611	0.011968943	0.048318714	0.025680034	0.022720797	5	9	9
ENSG00000145911.5	N4BP3	1.027264279	0.022967585	0.304296038	0.130639527	0.130387624	0.00017881	0.000340604	27	30	30
ENSG00000144895.7	EIF2A	-1.027029244	-0.012300926	0.304406694	0.420738437	0.578437877	1.18E-20	1.15E-18	23	23	23
ENSG00000118407.10	FILIP1	1.026556824	0.030176897	0.304629193	0.059450638	0.096862591	0.001374607	0.001944953	24	26	26
ENSG00000203668.1	CHML	-1.026230065	-0.034501868	0.304783153	0.051521248	0.044534072	0.032374812	0.027442875	33	35	35
ENSG00000188554.9	NBR1	1.025974235	0.026333297	0.304903729	0.090310167	0.302516107	1.77E-09	1.07E-08	16	21	21
ENSG00000114654.6	EFCC1	-1.025419775	-0.022217943	0.305165162	0.121049945	0.097108708	0.001354345	0.001923981	32	39	39
ENSG00000101115.8	SALL4	-1.024721402	-0.019920605	0.305494662	0.13847149	0.071108575	0.006473475	0.007269385	52	57	57
ENSG00000148943.7	LIN7C	1.024227362	0.029047118	0.305727898	0.041043517	0.050898987	0.021942948	0.020025434	10	11	11
ENSG00000196236.8	XPNPEP3	-1.023562595	-0.027725793	0.30604192	0.078734093	0.087499203	0.002416349	0.003149347	22	25	25
ENSG00000143847.11	PPFIA4	-1.022715648	-0.013237911	0.306442311	0.339908751	0.196825051	2.68E-06	8.34E-06	62	70	70
ENSG00000108679.8	LGALS3BP	-1.021475378	-0.022492329	0.307029269	0.177925494	0.189998351	4.18E-06	1.22E-05	48	61	61
ENSG00000125285.4	SOX21	-1.021225795	-0.026778741	0.307147474	0.085991744	0.049486649	0.023914065	0.021426292	44	47	47
ENSG00000170855.3	TRIAP1	-1.020969383	-0.02803678	0.307268945	0.065035384	0.09369964	0.001663449	0.002289534	24	33	33
ENSG00000175279.17	APITD1	-1.020246235	-0.092542922	0.307611695	0.007834273	0.050805553	0.02206808	0.020113685	5	8	8
ENSG00000136856.13	SLC2A8	-1.02017536	-0.019807231	0.307645301	0.133157855	0.257521483	4.48E-08	2.08E-07	20	25	25
ENSG00000071794.11	HLTF	-1.019908695	-0.017030623	0.307771765	0.176756852	0.274074163	1.39E-08	7.17E-08	22	24	24
ENSG00000110148.5	CCKBR	1.019510288	0.024406175	0.307960771	0.122680549	0.039327158	0.04463668	0.035489528	35	43	43
ENSG00000100083.14	GGA1	1.019163473	0.022972962	0.308125365	0.088219474	0.069625423	0.007077513	0.007833298	40	44	44
ENSG00000008256.11	CYTH3	-1.018576744	-0.024398131	0.30840395	0.098036438	0.085220324	0.002771386	0.003544178	28	53	53
ENSG00000154040.16	CABYR	-1.018308695	-0.020223259	0.308531278	0.158446411	0.266475347	2.39E-08	1.18E-07	18	19	19
ENSG00000178222.8	RNF212	-1.017971203	-0.031084493	0.308691642	0.068732355	0.179222197	8.37E-06	2.26E-05	15	23	23
ENSG00000174348.9	PODN	-1.017528264	-0.023148286	0.308902193	0.08408953	0.035061318	0.058232753	0.043892216	30	34	34
ENSG00000185658.9	BRWD1	-1.017505766	-0.0174078	0.308912891	0.173212738	0.069129343	0.007291925	0.008035407	56	60	60
ENSG00000197555.5	SIPA1L1	-1.01604192	-0.067871154	0.309609425	0.017629829	0.036492493	0.053245684	0.040928571	6	6	6
ENSG00000249853.3	HS3ST5	1.015775564	0.050671135	0.309736275	0.02330118	0.05230014	0.020150732	0.018762568	7	9	9
ENSG00000100031.14	GGT1	1.015515306	0.035921199	0.309860254	0.105471686	0.035534292	0.05653277	0.042857445	40	51	51
ENSG00000214046.4	SMIM7	1.014984958	0.769791524	0.310112998	0.000157616	0.051970998	0.020557884	0.019064507	2	2	2
ENSG00000183891.5	TTC32	-1.014745476	-0.048301689	0.310227171	0.075979523	0.218534665	6.41E-07	2.34E-06	22	22	22
ENSG00000156858.7	PRR14	-1.014737739	-0.033014679	0.310230859	0.089309955	0.045464625	0.030578507	0.026202778	24	28	28
ENSG00000079785.10	DDX1	-1.014562551	-0.023061629	0.310314398	0.116868132	0.0678697	0.007866132	0.008545698	37	43	43
ENSG00000184840.7	TMED9	1.014557248	0.035707179	0.310316927	0.054461397	0.037181181	0.051006657	0.039584329	20	23	23
ENSG00000258289.3	CHURC1	-1.014026703	-0.011808034	0.31057001	0.338280192	0.413264842	2.46E-13	3.58E-12	79	79	79
ENSG00000145824.8	CXCL14	-1.013798055	-0.016193235	0.310679124	0.195960484	0.084657344	0.002866827	0.003649083	48	49	49
ENSG00000197134.7	ZNF257	1.013512972	0.019980977	0.310815203	0.150522868	0.281311394	8.30E-09	4.51E-08	23	36	36
ENSG00000128285.4	MCHR1	-1.01334328	-0.047329428	0.310896222	0.027637094	0.048964566	0.024687628	0.022002347	14	18	18
ENSG00000110092.3	CCND1	-1.012916565	-0.352375786	0.311100015	0.000533268	0.059494082	0.013032923	0.013168019	1	1	1
ENSG00000174886.8	NDUFA11	-1.012460665	-0.018503025	0.311317845	0.119734022	0.122046922	0.000298121	0.000526218	22	24	24
ENSG00000261794.1	GOLGA8H	1.012444178	0.042042112	0.311325725	0.031159658	0.063657111	0.010137906	0.010609681	15	23	23
ENSG00000136869.13	TLR4	1.012086006	0.014912005	0.311496933	0.199650934	0.073135907	0.005730538	0.00656856	63	66	66
ENSG00000134317.13	GRHL1	1.011712627	0.033764068	0.311675476	0.050406211	0.10493243	0.000844092	0.001287537	37	38	38
ENSG00000169860.4	P2RY1	1.011201175	0.032261786	0.311920153	0.053881072	0.039689698	0.043644823	0.034857625	23	24	24
ENSG00000144909.7	OSBPL11	-1.01093895	-0.026365173	0.312045651	0.069961559	0.061118825	0.011815058	0.012085972	22	26	26
ENSG00000146223.10	RPL7L1	-1.010481327	-0.028964936	0.312264741	0.059120319	0.081937154	0.003376247	0.004200762	18	19	19
ENSG00000159958.3	TNFRSF13C	1.010130064	0.016272413	0.31243298	0.257525856	0.090158737	0.002058928	0.002760814	60	78	78
ENSG00000000460.12	C1orf112	-1.010064163	-0.014720148	0.312464551	0.208381309	0.365037409	1.41E-11	1.39E-10	33	38	38
ENSG00000183281.10	PLGLB1	1.009930626	0.029486716	0.312528529	0.084921883	0.267814636	2.17E-08	1.08E-07	6	16	16
ENSG00000175121.7	WFDC5	-1.009769207	-0.014968192	0.312605876	0.24986918	0.060931685	0.011949266	0.012212663	69	74	74
ENSG00000255468.2	RP11-867G23.8	-1.009677663	-0.038951135	0.312649747	0.041643579	0.147028724	6.39E-05	0.000137803	6	8	8
ENSG00000167858.8	TEKT1	1.009364247	0.627643216	0.312799978	0.000155164	0.052406436	0.020021001	0.018671262	1	1	1
ENSG00000148384.11	INPP5E	-1.009256614	-0.016521635	0.312851582	0.219117418	0.36368935	1.57E-11	1.53E-10	18	19	19
ENSG00000163138.14	PACRGL	1.009159062	0.016447375	0.312898356	0.24469438	0.207305995	1.35E-06	4.56E-06	54	71	71
ENSG00000188771.3	C11orf34	1.008595158	0.065521778	0.31316883	0.016397492	0.032646767	0.067785818	0.049664072	21	22	22
ENSG00000213077.5	FAM106A	-1.007645568	-0.038430182	0.313624645	0.050582205	0.303723	1.62E-09	9.88E-09	10	24	24
ENSG00000218537.1	AP000350.4	1.005611715	0.016024718	0.314602386	0.229863894	0.385390329	2.65E-12	3.02E-11	24	27	27
ENSG00000188827.6	SLX4	1.005235686	0.026456933	0.314783375	0.081957513	0.088581521	0.002263986	0.002982636	21	23	23
ENSG00000152556.11	PFKM	-1.004919945	-0.016497322	0.3149354	0.219967232	0.138248418	0.000110145	0.000223404	89	92	92
ENSG00000101282.4	RSPO4	1.00491858	0.029540816	0.314936057	0.071563874	0.097144394	0.001351432	0.001920614	36	38	38
ENSG00000134802.13	SLC43A3	1.004916076	0.02519329	0.314937263	0.089802407	0.179129076	8.42E-06	2.27E-05	11	11	11
ENSG00000159210.5	SNF8	-1.004866313	-0.044394413	0.314961227	0.0272835	0.111198351	0.0005773	0.000935445	26	31	31
ENSG00000212124.2	TAS2R19	-1.004649497	-0.026049099	0.315065654	0.07747502	0.169577637	1.55E-05	3.92E-05	12	19	19
ENSG00000008382.11	MPND	-1.003971097	-0.525229581	0.315392545	0.000216804	0.081321298	0.003503589	0.004334806	2	2	2
ENSG00000040487.8	PQLC2	1.00319244	0.02782583	0.31576802	0.087381628	0.080936793	0.003585514	0.004419166	43	46	46
ENSG00000088682.9	COQ9	-1.002912	-0.017749453	0.315903322	0.164498973	0.271732422	1.65E-08	8.35E-08	32	32	32
ENSG00000135537.12	LACE1	-1.002775208	-0.035267063	0.315969333	0.083171597	0.054007188	0.018166842	0.017288512	21	21	21
ENSG00000107201.5	DDX58	1.002217975	0.017905159	0.316238328	0.212654504	0.099430426	0.001177235	0.001713671	54	60	60
ENSG00000160360.7	GPSM1	1.000847008	0.016301304	0.316900779	0.279229636	0.323532828	3.65E-10	2.61E-09	61	77	77
ENSG00000165905.12	GYLTL1B	-1.000612106	-0.02568857	0.317014375	0.10843594	0.078450897	0.004163373	0.004987153	24	27	27
ENSG00000100982.7	PCIF1	-1.000519778	-0.020992533	0.317059031	0.111564117	0.045984381	0.029620006	0.025549904	62	64	64
ENSG00000185043.6	CIB1	-1.000414863	-0.021733441	0.31710978	0.122245076	0.23332221	2.37E-07	9.61E-07	14	15	15
ENSG00000196943.8	NOP9	0.99955951	0.020276785	0.317523726	0.124479653	0.082837531	0.003198344	0.003999107	46	58	58
ENSG00000188186.6	LAMTOR4	-0.999038972	-0.020720992	0.317775813	0.144688667	0.282111363	7.84E-09	4.29E-08	15	15	15
ENSG00000127564.12	PKMYT1	0.998780869	0.033073773	0.317900856	0.058409215	0.186997506	5.08E-06	1.45E-05	9	9	9
ENSG00000124374.8	PAIP2B	0.997627761	0.044172944	0.318459894	0.029335826	0.08311808	0.003144847	0.003947565	15	17	17
ENSG00000100359.16	SGSM3	-0.997244538	-0.023116826	0.318645827	0.095971984	0.166548575	1.88E-05	4.66E-05	23	24	24
ENSG00000156711.12	MAPK13	-0.996630131	-0.021186065	0.318944075	0.141723976	0.200176619	2.16E-06	6.87E-06	48	50	50
ENSG00000119242.4	CCDC92	-0.996463703	-0.031338831	0.319024895	0.060039331	0.103173096	0.000938912	0.001413278	14	16	16
ENSG00000165646.7	SLC18A2	0.995310005	0.018565073	0.319585513	0.183642154	0.295179039	3.03E-09	1.76E-08	38	38	38
ENSG00000054654.11	SYNE2	-0.993901997	-0.041498611	0.320270582	0.03578441	0.144760762	7.36E-05	0.000155454	8	11	11
ENSG00000075131.5	TIPIN	-0.993841253	-0.016952547	0.320300159	0.232934258	0.152533939	4.53E-05	0.00010101	65	69	69
ENSG00000007129.13	CEACAM21	-0.99314856	-0.024461343	0.320637562	0.115313016	0.10541411	0.000819832	0.001258673	15	23	23
ENSG00000174611.7	KY	-0.992781224	-0.022579507	0.320816582	0.121649976	0.105904115	0.000795862	0.001227735	58	59	59
ENSG00000100987.10	VSX1	-0.991926556	-0.014534139	0.321233354	0.292984351	0.417679736	1.67E-13	2.55E-12	30	36	36
ENSG00000256980.4	KHDC1L	0.991498294	0.022400273	0.321442325	0.117485091	0.123642459	0.000270409	0.000483576	28	33	33
ENSG00000186470.9	BTN3A2	-0.991456048	-0.013395579	0.321462944	0.395617823	0.503874907	4.69E-17	1.47E-15	97	102	102
ENSG00000106018.9	VIPR2	-0.990812049	-0.033404651	0.321777365	0.043042152	0.118530124	0.000369519	0.000635747	4	12	12
ENSG00000188393.4	CLEC2A	0.990213729	0.024628536	0.322069663	0.117908023	0.160001536	2.84E-05	6.71E-05	17	24	24
ENSG00000156299.8	TIAM1	-0.989868924	-0.034513517	0.32223819	0.059422827	0.181190436	7.38E-06	2.01E-05	7	8	8
ENSG00000104972.10	LILRB1	-0.989678014	-0.018415906	0.322331525	0.133962649	0.043689832	0.03409821	0.028636106	47	56	56
ENSG00000141425.13	RPRD1A	0.989379493	0.025331961	0.322477504	0.106129623	0.043808839	0.033849677	0.028476395	61	65	65
ENSG00000105982.12	RNF32	-0.988161222	-0.019586172	0.323073696	0.140811764	0.087979826	0.002347468	0.003077715	44	51	51
ENSG00000156219.12	ART3	-0.98815331	-0.030429825	0.323077571	0.063079998	0.15718374	3.39E-05	7.81E-05	36	37	37
ENSG00000128512.15	DOCK4	0.987764558	0.019456959	0.323267969	0.144086611	0.125797942	0.000236978	0.000432538	32	35	35
ENSG00000125703.10	ATG4C	0.987755856	0.045465699	0.323272232	0.026204593	0.080270693	0.003731992	0.004563086	31	32	32
ENSG00000116005.7	PCYOX1	-0.987699151	-0.697865114	0.32330001	0.00013513	0.039855174	0.043199718	0.034585419	1	1	1
ENSG00000110944.4	IL23A	-0.986534174	-0.059396091	0.323871054	0.019751558	0.060010607	0.012632591	0.012840559	4	4	4
ENSG00000170647.2	TMEM133	0.985329024	0.01791616	0.324462481	0.185074547	0.060395567	0.012342325	0.012574421	69	81	81
ENSG00000110700.2	RPS13	0.984735883	0.019859165	0.324753822	0.134172897	0.041027653	0.040177438	0.032656083	56	60	60
ENSG00000204308.6	RNF5	-0.984216748	-0.054722488	0.325008953	0.020285135	0.098306406	0.001259903	0.001811644	19	23	23
ENSG00000023902.9	PLEKHO1	0.98386599	0.042472509	0.325181408	0.032905044	0.102868987	0.000956342	0.001434953	13	19	19
ENSG00000138621.7	PPCDC	-0.983801539	-0.025431894	0.325213103	0.098546248	0.183969277	6.17E-06	1.73E-05	13	15	15
ENSG00000170153.6	RNF150	0.983789699	0.035032492	0.325218925	0.049496488	0.046397976	0.028879308	0.025019473	14	16	16
ENSG00000162736.11	NCSTN	-0.982776264	-0.018743022	0.325717566	0.130486785	0.039298716	0.044715473	0.035544185	59	68	68
ENSG00000135916.11	ITM2C	0.982499265	0.042652481	0.325853945	0.037643463	0.041112248	0.03996801	0.032538197	30	31	31
ENSG00000158109.10	TPRG1L	-0.980998061	-0.032039913	0.326593698	0.058880999	0.087338096	0.002439886	0.003176513	21	21	21
ENSG00000175745.7	NR2F1	-0.980631355	-0.039841463	0.326774566	0.067338939	0.065330902	0.00916531	0.009727082	24	27	27
ENSG00000122025.10	FLT3	0.980295673	0.01259163	0.32694019	0.351232326	0.547980848	4.09E-19	2.17E-17	27	35	35
ENSG00000106605.6	BLVRA	-0.980276867	-0.029007287	0.32694947	0.067915981	0.042083784	0.037642046	0.031022303	20	24	24
ENSG00000187783.7	TMEM72	0.979337889	0.042295725	0.327413055	0.03587527	0.033651282	0.063625739	0.047103962	15	17	17
ENSG00000138175.8	ARL3	-0.979140031	-0.038427084	0.327510795	0.040942414	0.081784399	0.003407395	0.004236587	33	36	36
ENSG00000122376.7	FAM35A	0.978772481	0.05447603	0.32769241	0.024391212	0.041707603	0.03852564	0.031610655	8	9	9
ENSG00000115297.9	TLX2	0.978530235	0.022909142	0.327812145	0.127404245	0.049005209	0.024626501	0.021961438	53	58	58
ENSG00000108771.8	DHX58	-0.977659721	-0.026036123	0.32824265	0.112504992	0.126961091	0.000220671	0.000407304	17	23	23
ENSG00000111110.7	PPM1H	0.977515167	0.0413137	0.328314173	0.029822003	0.034405453	0.060679077	0.045426355	17	17	17
ENSG00000184611.7	KCNH7	-0.975635154	-0.017177707	0.329245297	0.168492539	0.323712447	3.60E-10	2.58E-09	12	12	12
ENSG00000114331.8	ACAP2	-0.975180806	-0.009482261	0.329470581	0.446910575	0.066148769	0.008724788	0.009343661	78	99	99
ENSG00000115484.10	CCT4	-0.975018177	-0.019967746	0.329551244	0.09761737	0.033113758	0.065817353	0.048392248	28	33	33
ENSG00000162913.9	C1orf145	-0.974574438	-0.021016659	0.329771398	0.123614113	0.112991032	0.000517725	0.000852603	31	32	32
ENSG00000144747.10	TMF1	-0.97347571	-0.025686691	0.330316927	0.07137618	0.128973396	0.000195039	0.000366798	26	30	30
ENSG00000188981.6	MSANTD1	-0.973433738	-0.033618772	0.330337778	0.045214089	0.051124309	0.021644147	0.01982435	20	22	22
ENSG00000173535.9	TNFRSF10C	-0.97342646	-0.007858693	0.330341393	0.620972786	0.24700281	9.30E-08	4.08E-07	110	119	119
ENSG00000128266.7	GNAZ	0.973207629	0.027946059	0.33045012	0.066416342	0.081000519	0.003571805	0.004403804	31	41	41
ENSG00000106976.14	DNM1	0.973133298	0.022326126	0.330487056	0.071422333	0.042085771	0.037637436	0.031022303	24	30	30
ENSG00000124155.12	PIGT	-0.972255199	-0.022104793	0.330923606	0.164341393	0.035752887	0.055764688	0.042413518	46	54	54
ENSG00000099260.6	PALMD	0.971946027	0.018519241	0.3310774	0.16227691	0.082712263	0.003222523	0.004026493	52	58	58
ENSG00000213923.6	CSNK1E	-0.971699655	-0.639364806	0.331199988	0.000122504	0.059036585	0.013398199	0.013460189	1	1	1
ENSG00000182909.5	LENG9	0.971371104	0.039065311	0.331363512	0.0444812	0.113231328	0.000510217	0.000842964	15	17	17
ENSG00000163206.5	SMCP	0.971065463	0.017051431	0.331515681	0.16358865	0.347266839	5.82E-11	5.01E-10	9	10	10
ENSG00000136861.13	CDK5RAP2	-0.970784351	-0.016062253	0.331655677	0.297475926	0.165633888	1.99E-05	4.90E-05	63	79	79
ENSG00000111671.5	SPSB2	0.970494628	0.70759582	0.331800001	0.000138568	0.093551598	0.001678356	0.002307359	1	9	9
ENSG00000100979.10	PLTP	0.970456998	0.023490618	0.331818749	0.086278558	0.040060042	0.042655154	0.034246962	32	36	36
ENSG00000162836.7	ACP6	-0.969926619	-0.021121944	0.332083071	0.115290717	0.251698439	6.72E-08	3.02E-07	19	20	20
ENSG00000168385.13	Sep-02	-0.969288139	-0.018078335	0.332401445	0.126994839	0.452321505	7.27E-15	1.37E-13	36	45	45
ENSG00000131697.13	NPHP4	0.969214921	0.039580554	0.332437968	0.028775708	0.041860232	0.038164586	0.031358707	7	7	7
ENSG00000170275.10	CRTAP	0.966893037	0.044062995	0.333597508	0.033639918	0.063639797	0.010148492	0.010617618	9	12	12
ENSG00000154263.13	ABCA10	-0.966677575	-0.015299356	0.333705241	0.090432465	0.035731287	0.055840097	0.042432363	31	34	34
ENSG00000006607.9	FARP2	-0.965512614	-0.015252168	0.334288121	0.23524505	0.479904672	5.20E-16	1.29E-14	24	27	27
ENSG00000090487.6	SPG21	0.964646987	0.021842778	0.334721657	0.128441854	0.162083684	2.49E-05	5.94E-05	16	17	17
ENSG00000125630.11	POLR1B	0.964186997	0.027676961	0.334952182	0.107791233	0.245108996	1.06E-07	4.59E-07	15	17	17
ENSG00000186642.11	PDE2A	0.964086797	0.018160982	0.335002412	0.189261013	0.194447686	3.13E-06	9.54E-06	37	40	40
ENSG00000005075.11	POLR2J	-0.963105196	-0.030002469	0.335494734	0.068020355	0.204890339	1.58E-06	5.28E-06	30	35	35
ENSG00000130522.4	JUND	0.963100838	0.016427882	0.335496921	0.186697488	0.139387688	0.000102652	0.000209768	56	59	59
ENSG00000123643.8	SLC36A1	0.962905148	0.017443905	0.335595126	0.170320839	0.209418012	1.17E-06	4.03E-06	28	28	28
ENSG00000188176.7	SMTNL2	-0.962822885	-0.036004542	0.335636414	0.034225337	0.073413968	0.005635535	0.006478073	9	12	12
ENSG00000073712.9	FERMT2	-0.962618241	-0.020398395	0.33573914	0.135400763	0.04087417	0.040560303	0.032921886	44	49	49
ENSG00000167723.10	TRPV3	-0.962052688	-0.023139631	0.336023138	0.088018162	0.22111428	5.40E-07	2.02E-06	22	25	25
ENSG00000214026.6	MRPL23	-0.961890627	-0.024080682	0.336104547	0.085438821	0.03870552	0.046392106	0.036629991	48	52	52
ENSG00000127863.11	TNFRSF19	-0.961386906	-0.023568005	0.336357665	0.093736325	0.041325414	0.039445273	0.032193211	34	37	37
ENSG00000185630.14	PBX1	0.961234727	0.850739363	0.336434159	9.29E-05	0.051592939	0.02103589	0.019382667	2	3	3
ENSG00000182095.10	TNRC18	-0.961145111	-0.029479865	0.33647921	0.079103242	0.081237424	0.003521298	0.004349112	24	26	26
ENSG00000132182.7	NUP210	0.960844978	0.01868276	0.336630119	0.133722817	0.229312498	3.11E-07	1.23E-06	32	33	33
ENSG00000179630.6	LACC1	0.960673552	0.016682866	0.336716333	0.191526887	0.216045556	7.57E-07	2.71E-06	65	67	67
ENSG00000174915.7	PTDSS2	-0.96029215	-0.01418681	0.3369082	0.247391682	0.343251869	7.98E-11	6.72E-10	27	41	41
ENSG00000172020.8	GAP43	-0.960138543	-0.031808722	0.336985493	0.057387164	0.070440789	0.006738761	0.007526668	19	19	19
ENSG00000143434.11	SEMA6C	-0.959843428	-0.01842494	0.337134022	0.175196509	0.422388052	1.10E-13	1.72E-12	16	23	23
ENSG00000130413.11	STK33	0.959439445	0.022669829	0.337337412	0.082939581	0.133477174	0.000147853	0.00028911	19	21	21
ENSG00000159200.13	RCAN1	-0.959091287	-0.01666564	0.337512759	0.149793267	0.179808632	8.06E-06	2.18E-05	34	35	35
ENSG00000160953.10	MUM1	-0.958945407	-0.015766711	0.337586249	0.165893567	0.123877887	0.000266541	0.000477626	50	66	66
ENSG00000130294.10	KIF1A	-0.958721855	-0.032499123	0.337698885	0.069440655	0.03693432	0.051797747	0.040075172	30	34	34
ENSG00000171219.8	CDC42BPG	0.9579847	0.020126109	0.338070474	0.1198553	0.114890654	0.000461236	0.000773681	45	52	52
ENSG00000112039.3	FANCE	-0.957378705	-0.030497851	0.338376143	0.064222511	0.091756892	0.001870011	0.002531618	23	25	25
ENSG00000130309.6	COLGALT1	0.957135094	0.037024634	0.338499072	0.047359974	0.033149476	0.065669289	0.048313511	28	30	30
ENSG00000203784.2	LELP1	0.957053972	0.016484556	0.338540014	0.204896708	0.138811269	0.000106378	0.000216507	54	62	62
ENSG00000183426.11	NPIPA1	-0.956827921	-0.023913619	0.338654117	0.094371211	0.192972454	3.45E-06	1.03E-05	22	28	28
ENSG00000118322.8	ATP10B	0.956164912	0.013503117	0.338988924	0.285667846	0.109121815	0.000654843	0.001041533	85	97	97
ENSG00000066185.8	ZMYND12	-0.956098687	-0.016287047	0.339022378	0.158383423	0.224003851	4.45E-07	1.69E-06	34	39	39
ENSG00000109861.11	CTSC	-0.955766984	-0.018942068	0.339189972	0.165889976	0.089496989	0.002142609	0.002853551	42	53	53
ENSG00000196090.8	PTPRT	0.955718263	0.035046501	0.339214593	0.057379757	0.055946563	0.016152039	0.015701276	18	21	21
ENSG00000118900.10	UBN1	0.955461063	0.032472937	0.339344587	0.053689773	0.068317398	0.007657023	0.008360012	18	20	20
ENSG00000114107.4	CEP70	-0.955351472	-0.337340652	0.339399986	0.000508243	0.036982998	0.051640749	0.039971189	1	1	1
ENSG00000116032.5	GRIN3B	-0.954298084	-0.020421672	0.339932778	0.113015584	0.183504027	6.36E-06	1.77E-05	29	39	39
ENSG00000234719.4	RP11-166B2.1	-0.954261725	-0.012805084	0.339951177	0.36741643	0.377536526	5.08E-12	5.47E-11	78	84	84
ENSG00000139364.6	TMEM132B	-0.954123831	-0.02033398	0.340020964	0.122441202	0.196059372	2.82E-06	8.69E-06	39	46	46
ENSG00000170989.8	S1PR1	0.953921934	0.023953928	0.34012316	0.081000941	0.065993073	0.008806976	0.009414577	32	40	40
ENSG00000128915.7	NARG2	-0.953543503	-0.019820367	0.340314765	0.140004482	0.178823988	8.59E-06	2.31E-05	23	25	25
ENSG00000040531.10	CTNS	0.952827876	0.015067236	0.340677288	0.227562008	0.313253522	7.95E-10	5.24E-09	30	38	38
ENSG00000064309.10	CDON	-0.9527803	-0.011837037	0.340701398	0.353220049	0.535104424	1.71E-18	7.55E-17	34	38	38
ENSG00000124782.15	RREB1	-0.952495232	-0.03271206	0.340845883	0.053037504	0.072569148	0.005929175	0.006776483	26	27	27
ENSG00000023041.7	ZDHHC6	0.952290437	0.029299632	0.340949707	0.049449096	0.039034807	0.045453501	0.036025598	19	20	20
ENSG00000178607.11	ERN1	0.951914646	0.015380847	0.341140271	0.233909383	0.191680132	3.75E-06	1.11E-05	39	44	44
ENSG00000162873.10	KLHDC8A	0.950240623	0.019904983	0.341990001	0.143558905	0.114126201	0.000483194	0.000804707	46	51	51
ENSG00000006047.8	YBX2	-0.949942089	-0.025998627	0.342141679	0.089290795	0.039659246	0.04372725	0.034901672	29	33	33
ENSG00000223953.3	C1QTNF5	0.948442234	0.025066812	0.342904367	0.120603027	0.034230557	0.061349436	0.045821534	30	33	33
ENSG00000269282.1	AC024257.1	-0.948327932	-0.030530573	0.342962535	0.057467416	0.038885821	0.045875711	0.036278945	38	46	46
ENSG00000167291.11	TBC1D16	0.948148867	0.056323901	0.343053674	0.033118208	0.198860007	2.35E-06	7.40E-06	15	20	20
ENSG00000123243.10	ITIH5	0.947617289	0.02751626	0.343324321	0.060487977	0.093513557	0.001682209	0.002310858	40	48	48
ENSG00000182327.7	GLTPD2	-0.947470454	-0.016094513	0.343399105	0.190182944	0.037630519	0.049598813	0.038721125	58	70	70
ENSG00000174093.6	RP11-1407O15.2	0.946683645	0.233524297	0.343800007	0.001129827	0.053829474	0.018363775	0.017396361	1	2	2
ENSG00000154274.10	C4orf19	0.946338889	0.021265304	0.343975764	0.091673285	0.075026222	0.005114972	0.005961496	36	38	38
ENSG00000103245.9	NARFL	0.946012807	0.021042795	0.344142054	0.107867606	0.230196436	2.93E-07	1.16E-06	8	10	10
ENSG00000124251.6	TP53TG5	0.94598345	0.04421926	0.344157028	0.030694446	0.040723953	0.040938674	0.033130173	10	12	12
ENSG00000204571.4	KRTAP5-11	-0.945087653	-0.022519741	0.344614129	0.09344077	0.074281325	0.005349213	0.006187613	26	28	28
ENSG00000128564.5	VGF	0.944601541	0.020616598	0.34486234	0.126327469	0.114930358	0.000460123	0.000772467	44	54	54
ENSG00000122729.14	ACO1	-0.944512421	-0.019523732	0.344907858	0.123849609	0.274071334	1.39E-08	7.17E-08	10	10	10
ENSG00000115310.13	RTN4	-0.944317119	-0.012585512	0.345007621	0.268653838	0.373908221	6.85E-12	7.15E-11	27	30	30
ENSG00000248801.3	RP11-664D7.4	0.944086304	0.025533915	0.345125548	0.089454668	0.064505405	0.009632647	0.010165117	44	46	46
ENSG00000175643.7	RMI2	0.944028275	0.020200033	0.3451552	0.140786228	0.125658266	0.000239014	0.000434909	39	43	43
ENSG00000198576.2	ARC	-0.943699966	-0.040444004	0.345322991	0.028950581	0.083159165	0.003137088	0.003939223	6	9	9
ENSG00000077235.13	GTF3C1	0.942447403	0.043030414	0.345963628	0.027812817	0.071647204	0.006267149	0.007086422	21	23	23
ENSG00000176927.10	EFCAB5	-0.942235693	-0.020688332	0.346071984	0.123868501	0.179292384	8.33E-06	2.25E-05	26	34	34
ENSG00000146067.11	FAM193B	-0.941962629	-0.029456196	0.346211774	0.058577627	0.153967128	4.14E-05	9.32E-05	9	10	10
ENSG00000134253.5	TRIM45	-0.941556495	-0.02804841	0.346419752	0.054194602	0.142701119	8.36E-05	0.000173854	12	15	15
ENSG00000185028.3	LRRC14B	0.941399007	0.026991287	0.346500423	0.088883165	0.055199633	0.016899719	0.016270881	18	49	49
ENSG00000057019.11	DCBLD2	0.940522871	0.029255025	0.346949424	0.064830231	0.112463869	0.000534581	0.00087626	30	32	32
ENSG00000241935.4	HOGA1	0.940443757	0.014831998	0.346989986	0.232381434	0.08337204	0.00309719	0.003898812	55	58	58
ENSG00000188938.11	FAM120AOS	-0.940442739	-0.257209775	0.346990508	0.00044463	0.045902008	0.029769834	0.02563402	2	2	2
ENSG00000151067.16	CACNA1C	0.940405239	0.040496026	0.347009736	0.031135241	0.053428403	0.018816226	0.017739461	10	11	11
ENSG00000161103.7	AC008132.13	-0.940394046	-0.239941343	0.347015475	0.001363772	0.035633083	0.056184287	0.042666413	2	3	3
ENSG00000122966.9	CIT	-0.939059854	-1.966524006	0.347700015	1.42E-05	0.033453371	0.064423616	0.047565238	1	3	3
ENSG00000122756.10	CNTFR	-0.938762288	-0.040699121	0.347852805	0.02936427	0.033172106	0.065575662	0.048264706	10	14	14
ENSG00000008438.4	PGLYRP1	-0.938330405	-0.02355369	0.348074639	0.106356094	0.096134781	0.001436303	0.002018523	23	29	29
ENSG00000175267.10	VWA3A	-0.938218707	-0.009402904	0.348132026	0.467174196	0.161746475	2.54E-05	6.06E-05	81	100	100
ENSG00000143514.12	TP53BP2	0.938151234	0.507057856	0.348166695	0.000182778	0.055434848	0.016660557	0.016098297	3	3	3
ENSG00000152127.4	MGAT5	-0.938093569	-0.024221377	0.348196326	0.095413602	0.076672697	0.004633004	0.005466404	39	42	42
ENSG00000205212.3	CCDC144NL	0.937352594	0.032231671	0.348577218	0.040806212	0.133516487	0.000147496	0.00028873	19	31	31
ENSG00000101544.4	ADNP2	-0.936530709	-4.923545283	0.349000009	3.33E-06	0.041792474	0.03832444	0.031475431	1	2	2
ENSG00000144118.9	RALB	-0.936432904	-0.137708818	0.349050343	0.004316211	0.047525445	0.026954955	0.023659432	8	13	13
ENSG00000095397.9	DFNB31	0.936004664	0.016139768	0.349270787	0.168227861	0.322289809	4.02E-10	2.84E-09	15	15	15
ENSG00000106367.9	AP1S1	-0.935942526	-0.014766488	0.34930278	0.218422342	0.249355665	7.90E-08	3.51E-07	31	36	36
ENSG00000100997.14	ABHD12	0.935327302	0.038858742	0.349619649	0.035894817	0.053024218	0.019283649	0.018130898	14	17	17
ENSG00000173262.7	SLC2A14	-0.935171366	-0.463998422	0.349699993	0.000258832	0.150233824	5.23E-05	0.00011534	1	53	53
ENSG00000104723.16	TUSC3	0.934698141	0.017629982	0.349943885	0.141583008	0.086564114	0.002556187	0.003308852	41	44	44
ENSG00000156787.12	TBC1D31	0.933314175	0.021137237	0.350657778	0.091568655	0.049100038	0.024484481	0.021881018	34	39	39
ENSG00000013725.10	CD6	-0.932812186	-0.017998931	0.350916948	0.13435881	0.220139241	5.76E-07	2.14E-06	14	16	16
ENSG00000168765.11	GSTM4	-0.932725383	-0.033688848	0.350961776	0.038400277	0.046256464	0.029130579	0.025187809	13	17	17
ENSG00000176595.3	KBTBD11	0.93246613	0.01185354	0.351095683	0.33595664	0.419599817	1.41E-13	2.16E-12	31	38	38
ENSG00000175582.15	RAB6A	-0.93218437	-0.027896351	0.351241251	0.08550164	0.176210655	1.02E-05	2.69E-05	37	44	44
ENSG00000138669.5	PRKG2	0.932070673	2.264630086	0.351300003	8.97E-06	0.038484331	0.047033855	0.037040967	1	2	2
ENSG00000128185.5	DGCR6L	-0.931546614	-0.038170076	0.351570884	0.036713715	0.038142883	0.048042667	0.037705985	10	13	13
ENSG00000213246.2	SUPT4H1	0.930816067	0.013957884	0.351948717	0.294378712	0.217894541	6.69E-07	2.42E-06	45	47	47
ENSG00000113240.8	CLK4	-0.930076588	-0.029170964	0.352331432	0.060677262	0.080400479	0.00370299	0.004530803	20	27	27
ENSG00000103202.8	NME4	0.930046643	0.02064054	0.352346935	0.119656519	0.166183044	1.92E-05	4.76E-05	35	49	49
ENSG00000090857.9	PDPR	-0.929091679	-0.036732352	0.352841576	0.056979254	0.21692151	7.14E-07	2.57E-06	10	16	16
ENSG00000235098.4	ANKRD65	0.929038781	0.022231137	0.352868989	0.147671184	0.183718876	6.27E-06	1.75E-05	13	21	21
ENSG00000184923.8	NUTM2A	-0.928440004	-0.042975042	0.353179376	0.029114717	0.079561512	0.003894519	0.00471944	19	33	33
ENSG00000152977.5	ZIC1	-0.927959662	-0.221022882	0.353428495	0.001240432	0.046990639	0.02785084	0.024313059	3	3	3
ENSG00000180479.9	ZNF571	-0.927704071	-0.016451917	0.353561096	0.238621407	0.056138123	0.015965746	0.0155537	76	93	93
ENSG00000172893.11	DHCR7	-0.926791615	-0.017775878	0.354034739	0.164194327	0.052599941	0.019787011	0.018511613	55	80	80
ENSG00000122779.12	TRIM24	-0.926665962	-0.561688793	0.354099996	0.000145434	0.035839055	0.055464916	0.042247099	1	1	1
ENSG00000174227.11	PIGG	-0.926319446	-0.033434999	0.354279993	0.046009184	0.086246907	0.002605433	0.003361113	21	40	40
ENSG00000213240.7	NOTCH2NL	-0.926306469	-0.03607419	0.354286735	0.032478775	0.044749359	0.031949825	0.027180199	20	32	32
ENSG00000140463.9	BBS4	0.926199847	0.015321823	0.354342132	0.201322589	0.206283543	1.44E-06	4.85E-06	38	44	44
ENSG00000006114.11	SYNRG	-0.924269079	-0.020236332	0.355346237	0.132039101	0.27861243	1.01E-08	5.37E-08	9	9	9
ENSG00000079156.12	OSBPL6	0.924158464	0.013470054	0.355403818	0.304476749	0.136127797	0.00012556	0.000250787	75	92	92
ENSG00000196584.2	XRCC2	-0.923481575	-0.015828631	0.355756298	0.176960266	0.34060055	9.81E-11	8.11E-10	21	25	25
ENSG00000147642.12	SYBU	0.923210208	0.181397714	0.35589767	0.001258854	0.050585865	0.022365172	0.020300773	8	9	9
ENSG00000065268.6	WDR18	0.922963759	0.055919201	0.356026092	0.017351578	0.157503302	3.32E-05	7.68E-05	6	8	8
ENSG00000183111.7	ARHGEF37	0.922502523	0.029963156	0.356266515	0.05864403	0.089060554	0.002199643	0.002908702	28	31	31
ENSG00000171310.6	CHST11	0.922301345	0.011927511	0.356371413	0.319923048	0.53327011	2.09E-18	8.79E-17	8	12	12
ENSG00000175262.10	C1orf127	0.921983837	0.014591951	0.356537007	0.214925962	0.410467426	3.14E-13	4.38E-12	8	8	8
ENSG00000197599.8	CCDC154	0.920219842	0.009142257	0.357457888	0.387532886	0.345740079	6.56E-11	5.59E-10	47	61	61
ENSG00000164855.11	TMEM184A	0.920216854	0.030471843	0.357459449	0.053071962	0.044446922	0.032548499	0.027557085	16	21	21
ENSG00000167280.12	ENGASE	-0.920198978	-0.009442229	0.357468788	0.387799491	0.090968196	0.001960981	0.00264287	85	100	100
ENSG00000153339.9	TRAPPC8	-0.919818375	-0.028725379	0.35766768	0.058683691	0.097912464	0.001290221	0.001849225	29	31	31
ENSG00000136881.7	BAAT	-0.919623209	-0.022458346	0.357769694	0.093246554	0.033618986	0.063755226	0.047180076	42	46	46
ENSG00000068615.12	REEP1	0.918141552	0.014232956	0.358544763	0.256436644	0.256615692	4.77E-08	2.20E-07	61	70	70
ENSG00000106397.7	PLOD3	0.917886921	0.029973141	0.35867807	0.069051209	0.059007657	0.013421641	0.013479911	34	43	43
ENSG00000184371.9	CSF1	-0.917811436	-0.029652013	0.358717594	0.068031579	0.081155679	0.003538645	0.004367486	29	31	31
ENSG00000003436.10	TFPI	-0.917293561	-0.015933427	0.358988831	0.192575374	0.088112678	0.002328775	0.003058877	56	63	63
ENSG00000177663.9	IL17RA	0.916790356	0.015351771	0.359252507	0.237756976	0.256560367	4.79E-08	2.21E-07	47	61	61
ENSG00000112062.6	MAPK14	0.916610171	0.025593783	0.359346953	0.067449411	0.073072706	0.005752354	0.006589296	29	31	31
ENSG00000087250.4	MT3	0.916342367	0.234220694	0.359487353	0.000849908	0.039946234	0.042956786	0.034440308	6	6	6
ENSG00000119950.16	MXI1	-0.915691179	-0.02445804	0.359828893	0.084306641	0.089587336	0.002130988	0.002840212	28	30	30
ENSG00000135720.8	DYNC1LI2	-0.914985627	-0.753569007	0.360199176	0.000124953	0.034161757	0.061615262	0.045981242	2	2	2
ENSG00000229117.4	RPL41	-0.914120489	-0.047788911	0.360653537	0.013043643	0.038008749	0.048445092	0.037924748	10	18	18
ENSG00000075240.12	GRAMD4	0.913614501	0.010980117	0.360919444	0.608635286	0.159840553	2.87E-05	6.76E-05	117	142	142
ENSG00000164056.6	SPRY1	-0.913565773	-0.046038115	0.360945058	0.047835526	0.05598393	0.016115527	0.015673715	33	37	37
ENSG00000006625.13	GGCT	-0.913548998	-0.008333034	0.360953876	0.548455401	0.337633189	1.24E-10	9.97E-10	104	119	119
ENSG00000108797.7	CNTNAP1	-0.913492012	-0.010302476	0.360983833	0.476987222	0.145600395	6.98E-05	0.000148615	85	102	102
ENSG00000152620.8	NADK2	0.912910049	0.017979611	0.361289852	0.141558033	0.052109651	0.020385358	0.01892623	57	61	61
ENSG00000069998.8	CECR5	0.912819521	0.043336966	0.36133747	0.024170937	0.070624889	0.006664555	0.007455556	11	13	13
ENSG00000102796.6	DHRS12	-0.912574253	-0.031514332	0.361466501	0.068615691	0.057716398	0.014511363	0.014398572	19	20	20
ENSG00000107618.4	RBP3	-0.912150664	-0.032869669	0.361689411	0.050239663	0.093831366	0.001650295	0.002274083	10	11	11
ENSG00000119878.5	CRIPT	0.911589254	0.027665773	0.361984981	0.055805113	0.106707279	0.000758069	0.001179204	11	11	11
ENSG00000146910.7	CNPY1	-0.91123117	-0.025096752	0.362173584	0.078876926	0.050064702	0.023086365	0.02083776	40	46	46
ENSG00000160194.13	NDUFV3	0.910505884	0.027168486	0.36255578	0.049740584	0.096257391	0.00142572	0.002007148	10	10	10
ENSG00000171130.13	ATP6V0E2	0.909649066	0.024235704	0.363007613	0.077612292	0.203712998	1.71E-06	5.62E-06	12	13	13
ENSG00000129219.9	PLD2	0.909192161	0.024989136	0.363248702	0.087573564	0.165183785	2.05E-05	5.03E-05	21	23	23
ENSG00000119383.15	PPP2R4	-0.908132843	-0.04880843	0.36380804	0.02119893	0.091756025	0.001870109	0.002531618	6	8	8
ENSG00000136378.10	ADAMTS7	0.906879317	0.044392051	0.36447062	0.025084196	0.079602147	0.003885018	0.004709541	18	18	18
ENSG00000135913.6	USP37	0.906059134	0.033180721	0.364904554	0.037508136	0.347178469	5.86E-11	5.03E-10	31	35	35
ENSG00000166501.8	PRKCB	0.905811321	0.031096956	0.365035728	0.107309797	0.300516207	2.05E-09	1.23E-08	17	19	19
ENSG00000110497.10	AMBRA1	-0.905377916	-0.035477447	0.365265211	0.028443653	0.05673489	0.015399225	0.015099231	6	8	8
ENSG00000108064.6	TFAM	-0.904984744	-0.022724011	0.365473469	0.093385175	0.166126752	1.93E-05	4.77E-05	15	15	15
ENSG00000171794.3	UTF1	-0.904472787	-0.029776099	0.365744758	0.065450673	0.189087407	4.44E-06	1.29E-05	15	27	27
ENSG00000001460.13	STPG1	-0.904055677	-0.032983318	0.365965879	0.040401281	0.048328014	0.025665459	0.022713582	14	14	14
ENSG00000075043.13	KCNQ2	-0.903502104	-0.013900808	0.366259472	0.13140933	0.036103528	0.054555302	0.041688876	53	71	71
ENSG00000188629.7	ZNF177	0.903483196	0.016157509	0.366269503	0.236796593	0.176024174	1.03E-05	2.71E-05	46	59	59
ENSG00000145779.7	TNFAIP8	-0.902204086	-0.017933312	0.366948465	0.132987695	0.227789944	3.45E-07	1.35E-06	69	71	71
ENSG00000144026.7	ZNF514	0.901620892	0.019214551	0.367258289	0.129880285	0.296715222	2.71E-09	1.60E-08	29	51	51
ENSG00000081177.14	EXD2	-0.901368044	-0.012539341	0.367392666	0.233667878	0.085653757	0.002700071	0.003465506	79	81	81
ENSG00000143537.9	ADAM15	0.901255828	0.024584633	0.367452314	0.08512994	0.053974898	0.018202465	0.017299142	28	28	28
ENSG00000145217.9	SLC26A1	-0.901193698	-0.010284142	0.367485341	0.399611564	0.534826155	1.76E-18	7.69E-17	27	31	31
ENSG00000085491.11	SLC25A24	0.900652832	0.01450964	0.367772935	0.242378016	0.419661343	1.40E-13	2.16E-12	17	19	19
ENSG00000122694.11	GLIPR2	-0.900288899	-0.017512576	0.367966527	0.102632721	0.249310608	7.93E-08	3.51E-07	20	27	27
ENSG00000171345.9	KRT19	-0.900063297	-0.041633863	0.368086567	0.030081108	0.048359296	0.025616495	0.02268655	18	19	19
ENSG00000142166.8	IFNAR1	0.899998462	0.029761109	0.368121069	0.060097147	0.188886843	4.49E-06	1.30E-05	26	33	33
ENSG00000172785.14	CBWD1	0.899967513	0.044426145	0.36813754	0.025005832	0.125798648	0.000236967	0.000432538	8	12	12
ENSG00000170266.11	GLB1	-0.899861925	-0.018194498	0.368193735	0.128261095	0.255472283	5.17E-08	2.37E-07	14	16	16
ENSG00000253309.2	SERPINE3	-0.899805699	-0.023631454	0.368223661	0.1040424	0.040742106	0.040892756	0.033115742	44	47	47
ENSG00000164850.10	GPER1	0.899366375	0.117367324	0.368457544	0.005330259	0.033959787	0.062402622	0.046470781	6	19	19
ENSG00000186326.3	RGS9BP	0.898983595	0.030239974	0.368661399	0.043905598	0.033521291	0.064148617	0.04741168	21	22	22
ENSG00000141540.6	TTYH2	-0.897958163	-0.017392615	0.369207855	0.1230689	0.043321585	0.03487921	0.029208784	52	57	57
ENSG00000081026.14	MAGI3	0.897859573	0.026506095	0.36926042	0.061972194	0.038594192	0.046713967	0.036826583	25	29	29
ENSG00000108219.10	TSPAN14	0.89747864	0.012378546	0.369463566	0.320926739	0.207969988	1.29E-06	4.38E-06	89	105	105
ENSG00000115604.6	IL18R1	0.89730742	0.015562324	0.369554898	0.210012737	0.407650836	4.01E-13	5.45E-12	50	53	53
ENSG00000109586.7	GALNT7	0.896742	0.034820687	0.369856604	0.044639488	0.052946452	0.019374927	0.018193455	13	13	13
ENSG00000222040.3	ADRA2B	0.89669769	0.021947332	0.369880254	0.137511958	0.224268401	4.37E-07	1.67E-06	19	24	24
ENSG00000112081.12	SRSF3	-0.895975802	-0.013250864	0.370265687	0.241931381	0.107246947	0.00073368	0.00114479	47	51	51
ENSG00000134108.8	ARL8B	0.894951515	0.015053529	0.370813007	0.207857958	0.138504744	0.000108414	0.000220144	55	65	65
ENSG00000196405.8	EVL	0.894345035	0.016085007	0.371137311	0.160628785	0.142613231	8.41E-05	0.000174702	45	46	46
ENSG00000157214.9	STEAP2	-0.894144837	-0.011319828	0.371244402	0.395715184	0.612232975	1.68E-22	2.48E-20	38	44	44
ENSG00000243646.4	IL10RB	-0.892646172	-0.009296353	0.372046685	0.429616393	0.441358075	2.00E-14	3.58E-13	53	57	57
ENSG00000120341.14	SEC16B	0.892394278	0.027331954	0.372181637	0.076931708	0.047852254	0.026422058	0.023272534	19	21	21
ENSG00000093183.9	SEC22C	0.892097164	0.024310497	0.372340855	0.071063441	0.081940318	0.003375605	0.004200762	26	29	29
ENSG00000169174.9	PCSK9	-0.891903582	-0.026980632	0.372444615	0.073871779	0.032877291	0.066806481	0.049044242	35	38	38
ENSG00000170290.3	SLN	0.891474916	0.034112075	0.372674443	0.03645427	0.047296819	0.027334277	0.02395671	18	19	19
ENSG00000198440.5	ZNF583	0.890990663	0.054502224	0.372934179	0.01481087	0.039858157	0.043191736	0.034585419	4	4	4
ENSG00000175470.14	PPP2R2D	0.890962815	0.152805614	0.372949119	0.002173727	0.099099968	0.001200963	0.00173891	2	4	4
ENSG00000151553.10	FAM160B1	0.890642435	0.038118986	0.373121026	0.03640641	0.057211548	0.014961378	0.014737606	13	15	15
ENSG00000221990.2	C5orf55	-0.890633339	-0.025738285	0.373125907	0.065016713	0.05817453	0.014114852	0.014080184	16	25	25
ENSG00000115073.6	ACTR1B	-0.890399729	-0.013695381	0.373251288	0.200287955	0.237990819	1.73E-07	7.18E-07	27	38	38
ENSG00000105323.12	HNRNPUL1	0.890096855	0.013997932	0.373413881	0.185471529	0.052700049	0.019667053	0.018438363	44	56	56
ENSG00000063438.12	AHRR	-0.889961868	-0.02679834	0.373486362	0.04886088	0.136926302	0.000119521	0.0002409	10	13	13
ENSG00000162944.6	RFTN2	0.889952137	0.032267025	0.373491587	0.032075849	0.037552369	0.049840734	0.038849969	17	18	18
ENSG00000033178.8	UBA6	-0.889831196	-0.02752565	0.373556533	0.066694503	0.089406344	0.002154332	0.002863773	78	91	91
ENSG00000136238.13	RAC1	0.889655554	0.014498446	0.373650866	0.246547177	0.17375228	1.19E-05	3.09E-05	55	64	64
ENSG00000166311.5	SMPD1	-0.889564097	-0.648287067	0.373699992	0.000134976	0.051695674	0.020904887	0.01931731	1	1	1
ENSG00000101190.8	TCFL5	0.889559087	0.019097949	0.373702683	0.108514819	0.106595526	0.000763219	0.001186171	33	48	48
ENSG00000249931.3	GOLGA8K	-0.889449197	-0.018229914	0.373761715	0.153857329	0.041056688	0.040105429	0.032605047	43	51	51
ENSG00000134262.8	AP4B1	-0.888643729	-0.039459321	0.374194582	0.025863198	0.059289109	0.013195317	0.013290339	9	10	10
ENSG00000130226.12	DPP6	-0.888311602	-0.023189112	0.374373161	0.073566708	0.108444378	0.000682309	0.001079393	20	20	20
ENSG00000184389.8	A3GALT2	0.887547054	0.016039716	0.374784445	0.18067482	0.24519369	1.05E-07	4.57E-07	33	34	34
ENSG00000033627.10	ATP6V0A1	0.887540419	0.042116121	0.374788015	0.041829773	0.038800289	0.046119933	0.036431355	24	34	34
ENSG00000183562.2	AC131971.1	0.887191931	0.019834246	0.374975576	0.117625368	0.084871293	0.002830176	0.003607624	41	45	45
ENSG00000159063.8	ALG8	-0.886560758	-0.013766707	0.375315429	0.213456165	0.345405735	6.74E-11	5.73E-10	26	28	28
ENSG00000124225.11	PMEPA1	-0.886460146	-0.040124017	0.375369621	0.02215064	0.036299512	0.05389129	0.041279592	16	18	18
ENSG00000006712.10	PAF1	0.886136496	0.011705697	0.375543979	0.379723005	0.117002924	0.00040557	0.000690052	64	74	74
ENSG00000196683.6	TOMM7	0.885907591	0.022238704	0.375667325	0.103939562	0.259955029	3.78E-08	1.78E-07	18	22	22
ENSG00000101413.7	RPRD1B	0.885408373	0.031858718	0.375936418	0.043239092	0.052645405	0.019732441	0.018475219	12	16	16
ENSG00000019102.7	VSIG2	0.885218161	0.043677495	0.376038979	0.032664412	0.034409245	0.06066463	0.045425154	18	20	20
ENSG00000125818.13	PSMF1	0.884602157	0.010260202	0.376371243	0.386561564	0.197059491	2.64E-06	8.22E-06	93	108	108
ENSG00000006007.7	GDE1	-0.884501297	-0.026133775	0.376425663	0.069547799	0.137191725	0.000117577	0.000237253	25	32	32
ENSG00000175567.4	UCP2	-0.883907395	-0.014196351	0.376746205	0.193459128	0.114953613	0.000459472	0.000771741	36	47	47
ENSG00000112308.8	C6orf62	0.883470671	0.013923442	0.376982022	0.205515588	0.212183343	9.78E-07	3.42E-06	32	35	35
ENSG00000128973.7	CLN6	-0.883018802	-0.064655811	0.377226113	0.014355581	0.125703689	0.00023835	0.000434147	15	19	19
ENSG00000087338.4	GMCL1	-0.882646432	-0.016301813	0.377427333	0.176326481	0.145507192	7.02E-05	0.000149389	46	51	51
ENSG00000159339.9	PADI4	-0.882202113	-0.226811566	0.377667519	0.000961859	0.108091087	0.000697082	0.001096879	4	4	4
ENSG00000143851.11	PTPN7	0.882037689	0.026720703	0.377756426	0.063095013	0.122821713	0.00028433	0.00050566	17	17	17
ENSG00000164694.12	FNDC1	-0.88181699	-0.038225228	0.377875782	0.032267429	0.051684981	0.020918484	0.01931978	6	6	6
ENSG00000027697.8	IFNGR1	0.88179409	0.004528886	0.377888168	0.499120312	0.227587745	3.49E-07	1.37E-06	118	132	132
ENSG00000010361.9	FUZ	0.881361183	0.025087059	0.378122361	0.061360648	0.089537019	0.002137452	0.002847755	15	17	17
ENSG00000055211.8	GINM1	0.880295588	0.011424383	0.378699202	0.243304198	0.047213858	0.027473267	0.024048733	65	72	72
ENSG00000108830.7	RND2	0.880105019	0.033621227	0.37880242	0.044389664	0.055229887	0.016868763	0.016249923	30	34	34
ENSG00000173272.9	MZT2A	0.879927499	0.022439015	0.378898587	0.099531145	0.274614586	1.34E-08	6.94E-08	24	27	27
ENSG00000185262.7	UBALD2	-0.879728551	-0.044146171	0.379006379	0.024661619	0.052571468	0.019821267	0.018528959	6	8	8
ENSG00000177508.11	IRX3	-0.879082853	-0.028245708	0.379356354	0.057306943	0.033293111	0.0650774	0.047997847	18	19	19
ENSG00000213347.6	MXD3	-0.877433501	-0.021792158	0.380251224	0.105179543	0.220926315	5.46E-07	2.04E-06	5	5	5
ENSG00000176903.3	PNMA1	-0.876875618	-0.01491274	0.380554201	0.16930265	0.122592489	0.000288343	0.000511424	41	50	50
ENSG00000105185.7	PDCD5	0.876863773	0.016811511	0.380560635	0.202589796	0.174190408	1.15E-05	3.01E-05	47	51	51
ENSG00000137101.8	CD72	0.875486121	0.013315356	0.381309459	0.299620954	0.243145951	1.21E-07	5.18E-07	48	57	57
ENSG00000122971.4	ACADS	0.87406423	0.012658175	0.382083276	0.271601149	0.36955282	9.78E-12	9.94E-11	26	27	27
ENSG00000005961.13	ITGA2B	0.873476461	0.014456653	0.382403431	0.231363131	0.183193027	6.49E-06	1.81E-05	44	48	48
ENSG00000129518.4	EAPP	0.873450511	0.027481341	0.38241757	0.065921399	0.046491871	0.028713813	0.024918818	21	26	26
ENSG00000169371.9	SNUPN	-0.873288925	-0.0270461	0.382505616	0.058213971	0.202012883	1.91E-06	6.18E-06	20	32	32
ENSG00000205609.8	EIF3CL	-0.873204288	-0.014828898	0.382551738	0.274709616	0.100282506	0.001118178	0.001641212	67	101	101
ENSG00000214530.3	STARD10	0.873145988	0.015525645	0.38258351	0.185634986	0.245096467	1.06E-07	4.59E-07	36	36	36
ENSG00000116260.12	QSOX1	-0.872596848	-0.015774516	0.382882859	0.139083408	0.212073738	9.85E-07	3.44E-06	10	13	13
ENSG00000116883.8	RP11-268J15.5	-0.872474084	-0.021606348	0.3829498	0.081111939	0.114661725	0.000467706	0.000782598	19	20	20
ENSG00000157110.11	RBPMS	0.871690721	0.029102648	0.383377123	0.050563089	0.056118058	0.015985157	0.015568322	21	22	22
ENSG00000165912.11	PACSIN3	0.871681083	0.032169823	0.383382383	0.047318396	0.057951763	0.014306268	0.0142338	12	13	13
ENSG00000090432.5	MUL1	0.871295508	0.023322319	0.383592822	0.079009507	0.148588517	5.80E-05	0.000125967	20	21	21
ENSG00000153157.8	SYCP2L	-0.870935435	-0.03982568	0.383789408	0.025769674	0.11089797	0.000587926	0.000950053	2	2	2
ENSG00000165076.9	PRSS37	0.870659086	0.03974514	0.383940324	0.026169011	0.162283517	2.46E-05	5.87E-05	11	13	13
ENSG00000240204.2	SMKR1	0.870446499	0.022589007	0.384056445	0.129126851	0.290454601	4.28E-09	2.44E-08	5	5	5
ENSG00000130684.9	ZNF337	0.870337374	0.029351219	0.38411606	0.080423617	0.196254673	2.79E-06	8.61E-06	20	22	22
ENSG00000149196.11	C11orf73	0.86980387	0.018245223	0.384407596	0.208636718	0.109267411	0.000649084	0.0010347	72	84	84
ENSG00000241852.5	C8orf58	-0.869491463	-0.026163497	0.384578375	0.046962069	0.062570148	0.010824551	0.01121546	24	27	27
ENSG00000135547.4	HEY2	-0.869043367	-0.101354407	0.384823411	0.00323684	0.046633541	0.028465947	0.024740129	6	6	6
ENSG00000177990.7	DPY19L2	0.868883553	0.025025733	0.384910826	0.07714401	0.218572045	6.39E-07	2.33E-06	20	25	25
ENSG00000159871.10	LYPD5	-0.86880222	-0.015779918	0.384955319	0.154773243	0.31215785	8.63E-10	5.64E-09	12	12	12
ENSG00000110852.4	CLEC2B	0.867756805	0.020017706	0.385527481	0.100174657	0.065225372	0.009223757	0.009777648	24	54	54
ENSG00000147804.5	SLC39A4	0.86746899	0.011826615	0.385685095	0.435289705	0.194102254	3.20E-06	9.72E-06	61	84	84
ENSG00000197702.7	PARVA	0.867111124	0.037959565	0.385881126	0.041821506	0.114368467	0.000476125	0.000794431	9	11	11
ENSG00000172992.7	DCAKD	0.867022537	0.01410528	0.385929661	0.213912192	0.363886796	1.55E-11	1.51E-10	35	37	37
ENSG00000117114.15	LPHN2	-0.867020718	-0.04709768	0.385930658	0.021674539	0.075804329	0.004881245	0.005724928	11	11	11
ENSG00000175711.4	B3GNTL1	0.867007685	0.022437216	0.385937799	0.092279484	0.209329153	1.18E-06	4.05E-06	13	24	24
ENSG00000180185.7	FAHD1	0.866830854	0.01485873	0.386034694	0.178041344	0.487586396	2.43E-16	6.62E-15	20	28	28
ENSG00000175322.7	ZNF519	0.866225359	0.096608044	0.386366589	0.005370225	0.119866685	0.000340583	0.00059143	7	14	14
ENSG00000138032.16	PPM1B	0.865546507	0.027829131	0.386738902	0.092901938	0.081244572	0.003519786	0.004348762	26	28	28
ENSG00000132792.14	CTNNBL1	-0.865478699	-0.023215038	0.386776102	0.072244337	0.120307633	0.000331538	0.000577424	20	21	21
ENSG00000002587.5	HS3ST1	0.864613011	0.011342594	0.387251229	0.29223907	0.105123006	0.00083441	0.001276622	62	76	76
ENSG00000160325.10	CACFD1	0.863087688	0.022450023	0.388089257	0.087566051	0.062196714	0.011071118	0.011425083	29	34	34
ENSG00000140521.7	POLG	-0.862957032	-0.016263458	0.388161092	0.156119789	0.154216111	4.08E-05	9.19E-05	35	37	37
ENSG00000164825.3	DEFB1	0.862640014	0.016021666	0.388335423	0.164251614	0.337589447	1.24E-10	9.97E-10	23	33	33
ENSG00000143995.15	MEIS1	-0.862477343	-0.010888851	0.388424896	0.406338657	0.057996986	0.014267198	0.014204116	122	133	133
ENSG00000105366.11	SIGLEC8	0.862340808	0.192526987	0.388500003	0.001546164	0.03628024	0.053956209	0.041302487	1	1	1
ENSG00000075340.18	ADD2	0.862058733	0.025010166	0.388655199	0.031273494	0.040522833	0.041450978	0.033452922	12	14	14
ENSG00000145113.17	MUC4	-0.861748178	-0.017050028	0.388826108	0.140350083	0.125672961	0.000238799	0.000434741	33	51	51
ENSG00000179954.10	SSC5D	0.860853318	0.009752127	0.389318835	0.355685139	0.440082548	2.25E-14	3.98E-13	37	47	47
ENSG00000206561.8	COLQ	0.860739279	0.015356846	0.389381654	0.188152288	0.333111451	1.75E-10	1.35E-09	39	39	39
ENSG00000168803.10	ADAL	0.860094684	0.024357709	0.389736851	0.098061403	0.340649999	9.77E-11	8.10E-10	18	19	19
ENSG00000102543.10	CDADC1	0.860012454	0.017745427	0.389782177	0.161017919	0.305336245	1.43E-09	8.90E-09	36	38	38
ENSG00000100906.6	NFKBIA	0.859979659	0.17538429	0.389800255	0.000867689	0.038595557	0.046710006	0.036826583	4	4	4
ENSG00000188786.9	MTF1	-0.859746173	-0.021545283	0.389928977	0.087169818	0.083792741	0.003019825	0.003818987	37	43	43
ENSG00000129167.5	TPH1	-0.859736508	-0.023275811	0.389934306	0.097724091	0.04285321	0.035899229	0.029914254	39	43	43
ENSG00000178033.5	FAM26E	-0.859183466	-0.019889213	0.390239304	0.158124334	0.035239433	0.057586377	0.043497705	35	40	40
ENSG00000172167.3	MTBP	0.858800998	0.009442329	0.390450317	0.390754787	0.590264051	2.77E-21	3.16E-19	57	62	62
ENSG00000167972.9	ABCA3	-0.857886985	-0.017334535	0.390954871	0.18029689	0.129003103	0.000194684	0.000366604	50	66	66
ENSG00000092094.6	OSGEP	-0.857478745	-0.008693235	0.391180357	0.468063787	0.518554209	1.01E-17	3.70E-16	48	58	58
ENSG00000143196.4	DPT	0.857034907	0.033555316	0.391425594	0.041671747	0.056763698	0.015372398	0.015092045	12	16	16
ENSG00000121988.13	ZRANB3	0.856735947	0.020682498	0.391590832	0.242620029	0.055857233	0.016239664	0.015781431	61	74	74
ENSG00000111215.7	PRR4	-0.856579189	-0.011995605	0.391677491	0.309711186	0.454765443	5.79E-15	1.12E-13	69	70	70
ENSG00000185594.4	SPATA8	0.856149385	0.010773167	0.391915155	0.275151434	0.05678157	0.015355779	0.015079914	67	76	76
ENSG00000243566.2	UPK3B	0.855535942	0.024701391	0.392254515	0.078484068	0.348275985	5.38E-11	4.69E-10	20	34	34
ENSG00000214402.6	LCNL1	0.854745665	0.035409106	0.392691964	0.042195702	0.083679665	0.003040427	0.003837439	21	21	21
ENSG00000188130.9	MAPK12	-0.854013857	-0.023697046	0.393097312	0.082917734	0.082883806	0.003189458	0.003992229	31	44	44
ENSG00000129910.3	CDH15	-0.854002379	-0.010197939	0.393103671	0.324054238	0.183978054	6.17E-06	1.73E-05	57	83	83
ENSG00000205809.5	KLRC2	0.853998681	0.031683126	0.39310572	0.04471625	0.123982272	0.000264844	0.000474826	23	31	31
ENSG00000259658.3	RP11-89K11.1	-0.853875498	-0.011335844	0.393173977	0.336010366	0.36174074	1.84E-11	1.76E-10	67	73	73
ENSG00000135702.10	CHST5	-0.853381939	-0.038314476	0.393447534	0.029180921	0.058640712	0.013722616	0.013747063	12	12	12
ENSG00000150457.7	LATS2	0.853311224	0.017659445	0.393486737	0.141897913	0.181472476	7.25E-06	1.99E-05	24	26	26
ENSG00000070759.12	TESK2	-0.852798565	-0.022551372	0.39377102	0.089651709	0.100370822	0.001112228	0.001635193	33	36	36
ENSG00000115652.10	UXS1	0.852558105	0.011199804	0.393904404	0.34539942	0.065270876	0.009198509	0.009756462	84	97	97
ENSG00000197540.3	GZMM	0.851426129	0.033333928	0.394532682	0.055671674	0.317758168	5.66E-10	3.81E-09	21	24	24
ENSG00000144136.6	SLC20A1	0.851092009	0.036301952	0.394718244	0.040023125	0.125518078	0.000241076	0.000437538	21	28	28
ENSG00000173209.18	AHSA2	-0.850543449	-0.009600068	0.395023015	0.382334285	0.486104291	2.82E-16	7.50E-15	49	56	56
ENSG00000138794.5	CASP6	-0.850376495	-0.027216192	0.3951158	0.054334742	0.157585202	3.30E-05	7.65E-05	9	10	10
ENSG00000182963.5	GJC1	0.849972192	0.028332766	0.395340547	0.05653972	0.097486201	0.001323843	0.001888995	17	18	18
ENSG00000134326.7	CMPK2	0.849927586	0.018114888	0.395365347	0.164953808	0.092243553	0.001815987	0.002467797	49	52	52
ENSG00000132478.5	UNK	0.849900782	0.014627059	0.395380251	0.14844544	0.107360231	0.00072866	0.001138463	34	42	42
ENSG00000042317.12	SPATA7	0.849558679	0.011663147	0.395570493	0.28047406	0.236251069	1.94E-07	8.04E-07	58	66	66
ENSG00000143033.13	MTF2	0.849527017	0.041398402	0.395588103	0.030643533	0.043726238	0.034021981	0.028606046	26	29	29
ENSG00000159248.4	GJD2	-0.848565351	-0.051531567	0.396123194	0.007702584	0.037200694	0.050944665	0.039553574	4	6	6
ENSG00000160957.8	RECQL4	-0.847922352	-0.031686883	0.396481215	0.032768084	0.039640066	0.043779248	0.034925558	12	20	20
ENSG00000156170.8	NDUFAF6	0.846843261	0.018916965	0.397082491	0.095508384	0.169940196	1.51E-05	3.84E-05	37	40	40
ENSG00000151948.7	GLT1D1	0.845853187	0.026168442	0.39763465	0.07083335	0.081452945	0.003475971	0.00430817	15	16	16
ENSG00000184640.13	Sep-09	-0.845781206	-0.02282703	0.397674812	0.068842165	0.155829524	3.69E-05	8.41E-05	20	20	20
ENSG00000111670.10	GNPTAB	-0.845452276	-0.039288818	0.397858368	0.029718981	0.061577489	0.011492522	0.011800403	18	19	19
ENSG00000176974.13	SHMT1	-0.84448428	-0.05365668	0.398398844	0.013794236	0.149095655	5.62E-05	0.000122649	4	16	16
ENSG00000157017.11	GHRL	0.84396138	0.020593009	0.398690987	0.103644418	0.108737559	0.000670284	0.001064361	35	35	35
ENSG00000184428.8	TOP1MT	0.843263218	0.021243929	0.399081249	0.063714086	0.113949196	0.000488424	0.00081227	26	33	33
ENSG00000197586.8	ENTPD6	-0.842855605	-0.022295786	0.399309205	0.078735827	0.192941621	3.46E-06	1.03E-05	27	29	29
ENSG00000158008.5	EXTL1	-0.842682265	-0.0224167	0.399406169	0.086019825	0.17010863	1.50E-05	3.80E-05	6	6	6
ENSG00000103018.12	CYB5B	0.842652702	0.041319526	0.399422707	0.02823148	0.036404487	0.053539096	0.041080985	8	9	9
ENSG00000100364.14	KIAA0930	0.842555795	0.02144524	0.399476923	0.100497158	0.115796569	0.000436491	0.000737695	22	22	22
ENSG00000159228.8	CBR1	0.842110894	0.010898921	0.399725884	0.273307581	0.127004902	0.000220079	0.000406944	67	78	78
ENSG00000005812.6	FBXL3	-0.841111093	-0.028472677	0.400285701	0.0788605	0.046730773	0.028297098	0.024617575	24	32	32
ENSG00000141504.7	SAT2	-0.840611277	-0.019928454	0.400565739	0.111342145	0.201991783	1.91E-06	6.19E-06	50	60	60
ENSG00000159199.9	ATP5G1	-0.840116939	-0.025387368	0.400842824	0.06360283	0.207075791	1.37E-06	4.62E-06	13	15	15
ENSG00000105355.4	PLIN3	0.84001017	0.027303335	0.400902684	0.062884406	0.066407067	0.008590138	0.009221794	48	60	60
ENSG00000140259.6	MFAP1	-0.839972661	-0.036014493	0.400923716	0.041093349	0.035550911	0.056473989	0.042831242	22	22	22
ENSG00000163586.5	FABP1	0.839479875	0.02534501	0.401200078	0.063966829	0.126330246	0.000229372	0.000420392	17	22	22
ENSG00000078699.17	CBFA2T2	0.838739099	0.033735986	0.401615732	0.035167207	0.146438753	6.63E-05	0.000141918	17	21	21
ENSG00000105656.8	ELL	-0.838715499	-0.020084856	0.401628979	0.123169369	0.068004175	0.007802726	0.008489852	34	43	43
ENSG00000187987.5	ZSCAN23	0.838138419	0.018020758	0.401952968	0.156038961	0.18039088	7.77E-06	2.11E-05	36	40	40
ENSG00000213413.2	PVRIG	0.837829674	0.020196733	0.40212637	0.097498419	0.357073405	2.67E-11	2.50E-10	19	22	22
ENSG00000134375.6	TIMM17A	-0.837733936	-0.014292744	0.402180149	0.074309556	0.154551289	3.99E-05	9.02E-05	16	16	16
ENSG00000100577.14	GSTZ1	0.836799854	0.008692275	0.40270508	0.524281036	0.129085712	0.000193699	0.000365228	100	113	113
ENSG00000079246.11	XRCC5	0.836772668	0.024559819	0.402720363	0.072822841	0.169442598	1.56E-05	3.95E-05	11	13	13
ENSG00000167136.6	ENDOG	0.836107274	0.022084605	0.403094556	0.080361224	0.132237169	0.000159584	0.000308467	12	14	14
ENSG00000174100.5	MRPL45	-0.835571436	-0.017771241	0.403396043	0.161619648	0.155830258	3.69E-05	8.41E-05	32	47	47
ENSG00000173409.9	ARV1	-0.835127546	-0.037832796	0.403645898	0.028675389	0.066714304	0.008432693	0.009069287	15	17	17
ENSG00000101181.13	MTG2	-0.834823996	-0.028417776	0.403816813	0.04995512	0.102448215	0.000980988	0.001463535	12	12	12
ENSG00000123427.11	METTL21B	-0.834767051	-0.010636254	0.403848881	0.386537528	0.483209385	3.76E-16	9.56E-15	49	52	52
ENSG00000104643.5	MTMR9	-0.834636621	-0.027008885	0.403922336	0.039927118	0.068965857	0.007364005	0.008097179	13	18	18
ENSG00000117407.12	ARTN	-0.834327275	-0.012100005	0.404096586	0.297360789	0.41712696	1.76E-13	2.66E-12	23	23	23
ENSG00000152359.10	POC5	0.833560644	0.029158727	0.404528611	0.046356437	0.136887537	0.000119807	0.000241065	15	17	17
ENSG00000107611.10	CUBN	0.833141529	0.02991969	0.404764914	0.048842897	0.067135189	0.008221707	0.008874754	13	15	15
ENSG00000167792.7	NDUFV1	0.83261805	0.007262221	0.405060176	0.384550768	0.126836183	0.000222368	0.000409676	74	102	102
ENSG00000164197.7	RNF180	0.832252602	0.063746386	0.405266378	0.010848248	0.060516473	0.012252557	0.01249016	5	6	6
ENSG00000234465.6	PINLYP	-0.831518155	-0.017651687	0.405680976	0.163571988	0.245063192	1.06E-07	4.59E-07	31	32	32
ENSG00000138172.6	CALHM2	-0.831206516	-0.033959497	0.405856975	0.033161763	0.040516352	0.041467597	0.0334587	14	15	15
ENSG00000170802.11	FOXN2	-0.830789225	-0.013632136	0.406092711	0.265588261	0.563537907	6.88E-20	4.68E-18	23	27	27
ENSG00000144040.8	SFXN5	0.829555021	0.024772273	0.406790416	0.067259973	0.098369505	0.001255113	0.00180696	35	39	39
ENSG00000102547.14	CAB39L	0.829008234	0.025770411	0.407099748	0.066895969	0.101414172	0.00104427	0.001544267	25	32	32
ENSG00000167468.12	GPX4	0.828612649	0.022386609	0.407323628	0.053486863	0.130883475	0.000173441	0.000331897	6	6	6
ENSG00000185527.7	PDE6G	0.828432231	0.025816676	0.40742576	0.041665469	0.052483278	0.019927748	0.018613078	19	21	21
ENSG00000167751.8	KLK2	0.827986568	0.006286348	0.407678107	0.356168432	0.183537703	6.35E-06	1.77E-05	73	82	82
ENSG00000159445.8	THEM4	0.827099083	0.018163426	0.408180904	0.118586737	0.204356132	1.64E-06	5.45E-06	16	17	17
ENSG00000178163.3	ZNF518B	0.826422782	0.346419534	0.408564305	0.000404396	0.065780634	0.008920375	0.009515669	3	4	4
ENSG00000112685.9	EXOC2	-0.826249689	-0.013743388	0.408662467	0.280078684	0.149100822	5.62E-05	0.000122649	59	69	69
ENSG00000113319.7	RASGRF2	-0.825880395	-0.020679235	0.408871943	0.087618322	0.147675725	6.14E-05	0.000132767	21	23	23
ENSG00000256515.3	CCL3L3	0.825767886	0.044666407	0.408935775	0.03005607	0.181872207	7.06E-06	1.94E-05	13	15	15
ENSG00000184619.3	KRBA2	0.82507365	0.021336207	0.409329779	0.083988475	0.204235253	1.65E-06	5.48E-06	7	7	7
ENSG00000189046.6	ALKBH2	0.823912517	0.459534928	0.409989268	0.000126753	0.078947164	0.004041019	0.004871936	2	2	2
ENSG00000131242.11	RAB11FIP4	0.8238521	0.110651495	0.4100236	0.002082283	0.068022677	0.007794043	0.008483013	3	3	3
ENSG00000128928.4	IVD	0.823792639	0.015460304	0.410057391	0.101545668	0.036746048	0.052409665	0.040442455	39	40	40
ENSG00000146243.9	IRAK1BP1	-0.823737595	-0.021238079	0.410088673	0.080316379	0.158916659	3.04E-05	7.11E-05	20	26	26
ENSG00000198156.6	NPIPB6	-0.823496332	-0.041784593	0.410225802	0.021631305	0.072229752	0.006051414	0.006880621	8	9	9
ENSG00000162222.9	TTC9C	-0.82278354	-0.038197461	0.410631099	0.035278692	0.154408345	4.03E-05	9.09E-05	14	18	18
ENSG00000166225.4	FRS2	-0.822190689	-0.021733569	0.410968377	0.075960959	0.075707132	0.004909847	0.005752298	21	24	24
ENSG00000166869.2	CHP2	-0.822127784	-0.164111075	0.411004174	0.001609538	0.06215048	0.011102036	0.011452648	2	2	2
ENSG00000235878.4	AP001468.1	-0.822010893	-0.0185952	0.411070697	0.122211142	0.184208564	6.08E-06	1.71E-05	32	39	39
ENSG00000160767.16	FAM189B	0.821781567	0.085377503	0.411201227	0.007880998	0.045932359	0.029714539	0.025592637	6	8	8
ENSG00000132950.14	ZMYM5	0.821353871	0.019776984	0.411444731	0.083447519	0.052247153	0.020215718	0.018813173	30	40	40
ENSG00000164897.8	TMUB1	-0.820956545	-0.014345442	0.411671021	0.388735007	0.158468895	3.12E-05	7.28E-05	89	106	106
ENSG00000139146.9	FAM60A	0.820280266	0.026442814	0.412056353	0.06673152	0.08792481	0.002355252	0.003085634	15	18	18
ENSG00000113328.14	CCNG1	0.820115085	0.025770447	0.412150503	0.065164252	0.047254436	0.027405194	0.024001024	21	22	22
ENSG00000116473.10	RAP1A	0.819746349	0.022542637	0.412360722	0.064669647	0.075379176	0.005007595	0.005853707	59	61	61
ENSG00000124459.7	ZNF45	-0.819131018	-0.030693834	0.412711666	0.04523055	0.092101357	0.00183161	0.002487702	28	32	32
ENSG00000105793.11	GTPBP10	-0.818562684	-0.020074324	0.413035965	0.162183058	0.16839211	1.67E-05	4.19E-05	49	60	60
ENSG00000081913.9	PHLPP1	-0.818425663	-0.026540935	0.413114173	0.048891383	0.110282388	0.000610313	0.000983085	21	24	24
ENSG00000185808.9	PIGP	-0.818171236	-0.01978977	0.413259417	0.096689594	0.148823855	5.71E-05	0.000124336	34	43	43
[truncated: 2,780 more rows]

## Sheet: Cortex
S-prediXcan for HC (Pediatric+adult) for cortex
gene	gene_name	zscore	effect_size	pvalue	var_g	pred_perf_r2	pred_perf_pval	pred_perf_qval	n_snps_used	n_snps_in_cov	n_snps_in_model
ENSG00000206344.6	HCG27	-4.636889051	-0.340331995	3.54E-06	0.011802915	0.225187844	1.76E-06	1.34E-05	29	43	43
ENSG00000204410.10	MSH5	-4.281357842	-4.470375663	1.86E-05	5.99E-05	0.062848433	0.015937707	0.023417963	2	13	13
ENSG00000179344.12	HLA-DQB1	4.242125786	0.19619328	2.21E-05	0.029176983	0.542458994	5.91E-17	7.45E-15	21	58	58
ENSG00000120322.2	PCDHB8	4.102382754	0.082982663	4.09E-05	0.161397938	0.260317315	2.04E-07	2.00E-06	34	36	36
ENSG00000196735.7	HLA-DQA1	4.051617907	0.193641531	5.09E-05	0.024617338	0.459631615	1.14E-13	5.35E-12	14	47	47
ENSG00000167553.10	TUBA1C	4.029076994	0.070689129	5.60E-05	0.213515499	0.340736787	1.01E-09	1.87E-08	23	27	27
ENSG00000167965.13	MLST8	3.782985285	0.15504589	0.000154959	0.030100475	0.094987366	0.002800295	0.005980266	7	7	7
ENSG00000250120.2	PCDHA10	-3.665644537	-0.071003529	0.000246716	0.168488494	0.340817588	1.01E-09	1.87E-08	27	29	29
ENSG00000138041.11	SMEK2	3.641700111	0.057182637	0.000270843	0.238867784	0.047771718	0.036336633	0.043284554	55	60	60
ENSG00000204314.6	PRRT1	-3.50828429	-1.490845806	0.000451007	0.000307653	0.049085985	0.033798717	0.040897225	2	3	3
ENSG00000105607.8	GCDH	3.498576475	0.051711582	0.000467749	0.28976311	0.430231797	1.28E-12	5.03E-11	23	28	28
ENSG00000214087.4	ARL16	-3.40846995	-0.082098981	0.000653283	0.092079599	0.208141884	4.87E-06	3.22E-05	9	10	10
ENSG00000119125.12	GDA	-3.320937616	-0.131903391	0.000897156	0.025787268	0.049309237	0.033386029	0.040499986	8	8	8
ENSG00000151413.12	NUBPL	3.276761109	0.088954974	0.001050052	0.055960857	0.05006462	0.032027588	0.039279715	24	27	27
ENSG00000185829.11	ARL17A	-3.270844588	-0.070734906	0.001072268	0.15574257	0.381300559	5.52E-11	1.51E-09	49	54	54
ENSG00000204308.6	RNF5	-3.256254154	-0.088638841	0.001128926	0.07215258	0.166340904	5.45E-05	0.000246669	41	63	63
ENSG00000213654.5	GPSM3	-3.183376897	-0.120535495	0.00145568	0.040718558	0.054650981	0.024908915	0.032661977	14	36	36
ENSG00000204520.8	MICA	3.152135655	0.052805386	0.00162081	0.216330124	0.438728939	6.45E-13	2.68E-11	75	99	99
ENSG00000205426.6	KRT81	3.145444676	0.079055778	0.001658346	0.084662706	0.129170986	0.000434026	0.001380661	74	86	86
ENSG00000136881.7	BAAT	-3.100166129	-0.103548633	0.001934121	0.03717797	0.0793702	0.00651584	0.011661464	5	5	5
ENSG00000146834.9	MEPCE	3.09581975	0.088791424	0.001962696	0.068044861	0.26614873	1.42E-07	1.46E-06	26	31	31
ENSG00000239389.3	PCDHA13	3.070996908	0.055027176	0.002133454	0.206108464	0.375118905	8.71E-11	2.27E-09	38	41	41
ENSG00000117475.9	BLZF1	3.065984251	0.129319838	0.002169547	0.031034834	0.055354289	0.023969725	0.031818911	29	33	33
ENSG00000196963.2	PCDHB16	-3.046681718	-0.089497823	0.002313826	0.070739919	0.050584837	0.031125102	0.038452025	31	39	39
ENSG00000196126.6	HLA-DRB1	2.974261782	0.651387344	0.002936944	0.001205496	0.53040435	1.93E-16	2.07E-14	18	65	65
ENSG00000158089.10	GALNT14	2.964168059	0.123459647	0.003035025	0.029532789	0.084594624	0.004912968	0.009398333	14	15	15
ENSG00000075826.12	SEC31B	-2.940395176	-0.055192834	0.003277939	0.138527665	0.264890794	1.53E-07	1.56E-06	13	15	15
ENSG00000095917.9	TPSD1	-2.914541751	-0.070481021	0.003562112	0.08530448	0.313722981	6.43E-09	9.03E-08	35	52	52
ENSG00000172818.5	OVOL1	-2.902947645	-0.07630105	0.003696684	0.064305219	0.106939255	0.001464145	0.003602989	19	22	22
ENSG00000090932.6	DLL3	2.878042056	0.451677973	0.004001518	0.002635783	0.04599537	0.040081704	0.046794229	2	2	2
ENSG00000078487.13	ZCWPW1	-2.870273887	-0.041296143	0.004101164	0.258352014	0.468615866	5.33E-14	2.90E-12	46	51	51
ENSG00000184647.6	PRSS55	2.84973068	0.125737069	0.004375626	0.041940976	0.079039584	0.006633317	0.011839625	15	16	16
ENSG00000135541.16	AHI1	-2.841448164	-0.025874575	0.004490915	0.684494901	0.290528257	2.97E-08	3.58E-07	95	111	111
ENSG00000204525.10	HLA-C	2.836082909	0.064946489	0.004567059	0.145024169	0.631801215	3.12E-21	1.90E-18	30	46	46
ENSG00000085514.11	PILRA	-2.829956817	-0.051654534	0.004655429	0.172250592	0.578897749	1.37E-18	2.94E-16	33	41	41
ENSG00000178252.13	WDR6	-2.742514467	-0.10062941	0.006097076	0.043818008	0.063711224	0.015208294	0.022668734	12	17	17
ENSG00000198841.3	KTI12	-2.74019177	-0.04473558	0.006140335	0.230510923	0.104367323	0.001683804	0.004029488	69	86	86
ENSG00000226180.2	AC010536.1	-2.737012711	-0.062412685	0.00619999	0.097377195	0.050886691	0.030613416	0.037986947	29	34	34
ENSG00000151247.8	EIF4E	2.730092752	0.054805722	0.006331651	0.175146327	0.05236233	0.028233067	0.035812123	81	87	87
ENSG00000163590.9	PPM1L	-2.727680912	-0.312887953	0.006378127	0.003705098	0.063353694	0.015506369	0.022964591	10	12	12
ENSG00000128340.10	RAC2	-2.725175666	-0.106437201	0.006426728	0.040343138	0.051110371	0.030239806	0.037689836	7	7	7
ENSG00000166435.11	XRRA1	2.707784618	0.041820148	0.006773396	0.24019382	0.461996076	9.36E-14	4.50E-12	33	35	35
ENSG00000165355.7	FBXO33	2.702170867	0.174473215	0.006888835	0.012099942	0.055847448	0.023332737	0.031223028	5	10	10
ENSG00000101639.14	CEP192	2.700740643	0.055249474	0.006918527	0.162210201	0.274625921	8.28E-08	9.00E-07	33	36	36
ENSG00000127412.2	TRPV5	2.691558996	1.743317476	0.007111892	0.00014394	0.049481972	0.033070269	0.040296178	2	2	2
ENSG00000178662.11	CSRNP3	-2.6885172	-0.07644933	0.007177014	0.069414306	0.0497112	0.032655963	0.039884502	22	22	22
ENSG00000142632.12	ARHGEF19	-2.681192661	-0.05667685	0.007336027	0.118909435	0.123451729	0.000594302	0.001776024	12	17	17
ENSG00000238083.3	LRRC37A2	-2.674444104	-0.065382116	0.007485325	0.12243062	0.584098761	7.79E-19	1.90E-16	32	43	43
ENSG00000148655.10	C10orf11	-2.6639584	-0.065133359	0.007722711	0.099380068	0.165177143	5.82E-05	0.000260251	21	24	24
ENSG00000120324.4	PCDHB10	-2.645212147	-0.079782838	0.008163971	0.064508749	0.234149445	1.03E-06	8.23E-06	34	43	43
ENSG00000121716.14	PILRB	-2.613923125	-0.050386079	0.008950917	0.146641666	0.472073748	3.96E-14	2.26E-12	29	36	36
ENSG00000148600.10	CDHR1	-2.609332231	-0.038643612	0.009071912	0.220990736	0.326664011	2.68E-09	4.27E-08	30	36	36
ENSG00000204463.8	BAG6	-2.60671839	-0.0598157	0.009141451	0.118127991	0.19885098	8.40E-06	5.15E-05	30	42	42
ENSG00000074935.9	TUBE1	-2.585526054	-0.059129762	0.009723052	0.098899675	0.092498388	0.003204187	0.006678772	27	34	34
ENSG00000132740.4	IGHMBP2	2.582605153	0.064770028	0.009805748	0.07758581	0.170954855	4.19E-05	0.000198677	39	48	48
ENSG00000197355.6	UAP1L1	2.55066769	0.075802789	0.010751679	0.067505588	0.077734959	0.007117948	0.012496958	22	34	34
ENSG00000177352.9	CCDC71	-2.539263368	-0.059610178	0.011108616	0.098931009	0.176690053	3.02E-05	0.000150453	28	32	32
ENSG00000259363.1	CTD-2054N24.2	-2.535060002	-0.069984404	0.011242807	0.07510424	0.156189927	9.67E-05	0.000395688	16	19	19
ENSG00000242485.1	MRPL20	2.522414422	0.082322781	0.011655231	0.078222265	0.083800517	0.005128428	0.009718861	21	37	37
ENSG00000204228.3	HSD17B8	2.505710294	0.036573874	0.01222057	0.290975154	0.095943552	0.002658976	0.005761784	82	113	113
ENSG00000167264.13	DUS2	2.501046072	0.075730672	0.012382707	0.066764582	0.094056832	0.002944992	0.006227371	13	14	14
ENSG00000213672.3	NCKIPSD	2.49428711	0.054929522	0.012621041	0.111690905	0.189556977	1.44E-05	8.13E-05	14	16	16
ENSG00000035141.3	FAM136A	-2.493093731	-0.076216559	0.012663541	0.051090027	0.123631012	0.000588486	0.001761526	11	13	13
ENSG00000169087.6	HSPBAP1	-2.489328873	-0.048098184	0.012798452	0.140384858	0.186762702	1.69E-05	9.29E-05	54	59	59
ENSG00000137411.12	VARS2	-2.48885037	-0.039935359	0.012815689	0.204433108	0.313457013	6.54E-09	9.15E-08	112	125	125
ENSG00000178467.13	P4HTM	2.488615455	0.074511572	0.012824159	0.066317128	0.067415652	0.012440287	0.019323716	13	14	14
ENSG00000135390.13	ATP5G2	2.476408588	0.063158002	0.01327116	0.102834963	0.225711481	1.71E-06	1.31E-05	24	24	24
ENSG00000254415.3	SIGLEC14	-2.475790885	-0.070141739	0.013294142	0.093721684	0.185975986	1.77E-05	9.65E-05	14	20	20
ENSG00000112619.6	PRPH2	2.464451957	0.03994136	0.013722296	0.215607415	0.350949972	4.96E-10	1.04E-08	18	19	19
ENSG00000005471.11	ABCB4	2.447653344	0.051777855	0.014378992	0.115814205	0.07326421	0.009064301	0.015157082	31	36	36
ENSG00000162604.8	TM2D1	-2.434648311	-0.152190601	0.01490627	0.014630503	0.057413262	0.021422069	0.029244924	4	4	4
ENSG00000198892.6	SHISA4	2.434547071	0.067665151	0.01491044	0.086186756	0.108907863	0.001315441	0.003303847	40	43	43
ENSG00000183793.9	NPIPA5	2.431264673	0.13463194	0.015046219	0.017938062	0.046661101	0.038633663	0.045379325	7	11	11
ENSG00000197362.9	ZNF786	2.419097366	0.03734197	0.015559075	0.220739207	0.472158117	3.93E-14	2.26E-12	58	70	70
ENSG00000169752.12	NRG4	-2.405012839	-0.036918992	0.016171898	0.175120079	0.20960527	4.46E-06	3.01E-05	34	39	39
ENSG00000113649.7	TCERG1	-2.398315615	-0.461440544	0.016470667	0.001325889	0.090460007	0.003577784	0.007308195	6	6	6
ENSG00000161999.7	JMJD8	-2.39515072	-0.111571109	0.016613534	0.032872806	0.177987525	2.81E-05	0.000141557	17	22	22
ENSG00000085063.10	CD59	-2.392879451	-0.059406833	0.016716732	0.087446666	0.091997318	0.003292255	0.006819002	16	17	17
ENSG00000178802.13	MPI	2.380973292	0.060669877	0.017266964	0.088413857	0.107169061	0.001445961	0.003568751	22	30	30
ENSG00000186868.11	MAPT	2.377870538	0.090417621	0.017412938	0.03684424	0.183397549	2.06E-05	0.00010939	28	43	43
ENSG00000079332.10	SAR1A	-2.376337197	-0.072014667	0.017485476	0.059981162	0.05639973	0.022639796	0.030508164	25	26	26
ENSG00000100003.13	SEC14L2	-2.374613859	-0.079174508	0.017567317	0.054773941	0.053786389	0.026115055	0.033746726	8	10	10
ENSG00000071894.10	CPSF1	2.37358367	0.027398399	0.017616401	0.453294009	0.616193894	2.05E-20	9.34E-18	27	32	32
ENSG00000092036.12	HAUS4	-2.363267536	-0.039578744	0.018114587	0.185990766	0.252532352	3.32E-07	3.05E-06	25	30	30
ENSG00000122483.13	CCDC18	-2.35772112	-0.067951368	0.018387501	0.066711534	0.083672329	0.005164082	0.009766157	27	34	34
ENSG00000197345.8	MRPL21	-2.353772714	-0.035582386	0.01858397	0.20999551	0.381121885	5.60E-11	1.51E-09	36	42	42
ENSG00000232629.4	HLA-DQB2	-2.344972784	-0.189699687	0.019028469	0.022729485	0.484009483	1.40E-14	8.90E-13	8	34	34
ENSG00000087245.8	MMP2	-2.338759649	-0.025306509	0.019347876	0.502438035	0.130970717	0.000393062	0.001266905	72	84	84
ENSG00000137310.7	TCF19	-2.335899754	-0.058486689	0.019496467	0.079200566	0.209401669	4.52E-06	3.04E-05	34	40	40
ENSG00000115414.14	FN1	-2.335328314	-0.02642043	0.019526276	0.453300167	0.142489999	0.000207783	0.000738125	84	90	90
ENSG00000161692.13	DBF4B	2.323506355	0.087807022	0.020151967	0.043958229	0.072392825	0.009501791	0.015729424	15	16	16
ENSG00000057593.9	F7	2.322434679	0.054886479	0.020209542	0.141793666	0.23265771	1.12E-06	8.93E-06	38	58	58
ENSG00000100364.14	KIAA0930	-2.307091588	-0.06711714	0.021049715	0.116498333	0.131009523	0.000392222	0.001265315	30	35	35
ENSG00000117245.8	KIF17	2.304865584	0.051837547	0.021174103	0.123171319	0.07198925	0.009711537	0.016001843	31	32	32
ENSG00000100038.15	TOP3B	-2.302112153	-0.082104896	0.021328848	0.047255578	0.068779904	0.011554049	0.01830527	16	17	17
ENSG00000136319.7	TTC5	2.276629205	0.129362474	0.022808377	0.01981684	0.05691364	0.0220138	0.029807594	8	8	8
ENSG00000180104.11	EXOC3	-2.271443324	-0.060576645	0.023120154	0.074999916	0.123087653	0.000606289	0.001802993	12	17	17
ENSG00000125611.11	CHCHD5	-2.255109483	-0.094305443	0.024126458	0.03181988	0.072918461	0.009235415	0.01537237	14	17	17
ENSG00000170558.4	CDH2	-2.253794535	-0.033944019	0.024209097	0.254198814	0.216664932	2.94E-06	2.10E-05	51	54	54
ENSG00000168582.4	CRYGA	2.239563074	0.102977962	0.025119302	0.027999737	0.103075655	0.001806159	0.004266378	4	5	5
ENSG00000122548.3	KIAA0087	-2.238855536	-0.043658598	0.025165317	0.154411243	0.363427786	2.04E-10	4.86E-09	6	6	6
ENSG00000140451.8	PIF1	2.228234061	0.065227827	0.025864911	0.057490499	0.075670028	0.007958545	0.013642236	9	10	10
ENSG00000173418.7	NAA20	2.226439997	0.082133102	0.025984724	0.045655873	0.058179186	0.020546143	0.02840392	40	43	43
ENSG00000225190.4	PLEKHM1	-2.221523929	-0.087265814	0.026315496	0.034772311	0.13140259	0.000383815	0.001242584	7	19	19
ENSG00000163956.6	LRPAP1	-2.215707016	-0.054446485	0.026711574	0.067365368	0.169385747	4.59E-05	0.000214163	11	13	13
ENSG00000105819.9	PMPCB	-2.214050061	-0.05160497	0.026825335	0.111121622	0.0889674	0.003878593	0.007794435	29	35	35
ENSG00000119411.10	BSPRY	2.209925515	0.054260783	0.027110332	0.109425446	0.21345394	3.55E-06	2.47E-05	22	22	22
ENSG00000153786.8	ZDHHC7	-2.206576517	-1.005166695	0.027343659	0.000257887	0.066850025	0.012827524	0.019824032	2	2	2
ENSG00000181039.7	ANKRD34A	2.204601792	0.050221116	0.02748205	0.134121312	0.261661648	1.88E-07	1.86E-06	15	31	31
ENSG00000118514.9	ALDH8A1	-2.20447076	-0.033496315	0.027491254	0.233800924	0.3437711	8.21E-10	1.57E-08	26	26	26
ENSG00000085741.8	WNT11	-2.198713973	-0.123262585	0.027898267	0.021235215	0.081975697	0.005659995	0.01045853	7	8	8
ENSG00000137776.12	SLTM	-2.197101031	-0.092427296	0.028013232	0.044582558	0.057586695	0.021220463	0.029046322	16	17	17
ENSG00000269282.1	AC024257.1	2.185988441	0.037501125	0.028816451	0.173130588	0.09980705	0.002156655	0.004913149	61	72	72
ENSG00000167272.6	POP5	2.18466279	0.035534283	0.02891358	0.185526847	0.153542495	0.000112131	0.000445576	50	56	56
ENSG00000188199.6	NUTM2B	-2.184534138	-0.021274575	0.028923022	0.551394528	0.162551095	6.75E-05	0.000291909	104	136	136
ENSG00000125780.11	TGM3	-2.18451776	-0.040926824	0.028924224	0.145264711	0.122358946	0.000631003	0.001861332	37	43	43
ENSG00000186529.10	CYP4F3	2.181954216	0.064977095	0.029112912	0.057282724	0.070821973	0.010344755	0.016730508	29	33	33
ENSG00000164989.11	CCDC171	2.181194969	0.051220599	0.029168999	0.087838097	0.188133406	1.57E-05	8.69E-05	14	17	17
ENSG00000103044.6	HAS3	-2.179935342	-0.066953527	0.029262255	0.056636651	0.058118596	0.02061409	0.028467314	29	29	29
ENSG00000042317.12	SPATA7	2.175330788	0.037866229	0.029605337	0.185882795	0.317706842	4.92E-09	7.27E-08	14	14	14
ENSG00000167705.7	RILP	2.162235975	3.214224087	0.030599992	0.000168152	0.061254446	0.017379667	0.02497229	1	1	1
ENSG00000205571.8	SMN2	2.161511919	0.133118041	0.030655817	0.017774374	0.053410157	0.026658351	0.034218729	11	15	15
ENSG00000260916.1	CCPG1	2.156065962	0.064883127	0.031078515	0.069072723	0.097111203	0.002495993	0.00551421	22	22	22
ENSG00000183346.6	C10orf107	-2.155581785	-0.04203079	0.031116336	0.173776523	0.251454058	3.55E-07	3.24E-06	22	22	22
ENSG00000125618.12	PAX8	-2.14719509	-0.04692402	0.031777753	0.164367695	0.241137419	6.70E-07	5.69E-06	21	21	21
ENSG00000169877.5	AHSP	-2.145802197	-0.07854318	0.031888763	0.042616168	0.090981216	0.003478316	0.007128107	4	5	5
ENSG00000204961.5	PCDHA9	2.143939222	0.071686121	0.032037757	0.092463728	0.238212069	8.01E-07	6.56E-06	5	6	6
ENSG00000156253.2	RWDD2B	-2.139485689	-0.030024347	0.032396354	0.257968512	0.364172393	1.93E-10	4.63E-09	28	29	29
ENSG00000106511.5	MEOX2	2.135280596	0.060088914	0.032738097	0.066596205	0.067288132	0.012526548	0.019424657	29	29	29
ENSG00000182087.8	TMEM259	2.126713661	0.043488559	0.033443882	0.141423255	0.099558633	0.002185903	0.004955052	28	36	36
ENSG00000110723.7	EXPH5	-2.118650675	-0.147502659	0.03412	0.010799918	0.092839398	0.003145597	0.006575413	1	1	1
ENSG00000164081.8	TEX264	2.109766887	0.069744239	0.03487844	0.051167577	0.115980173	0.000894565	0.00241694	10	19	19
ENSG00000101546.8	RBFA	-2.106071868	-0.134601669	0.03519811	0.019140802	0.070502542	0.010525161	0.016939754	6	7	7
ENSG00000174837.10	EMR1	2.103913734	0.077126364	0.035385973	0.04797819	0.090051933	0.003657634	0.007428882	14	19	19
ENSG00000115306.11	SPTBN1	-2.096513899	-0.037405519	0.036036628	0.171991143	0.075329391	0.008106476	0.013859378	39	41	41
ENSG00000114656.6	KIAA1257	2.095152468	0.084168315	0.036157441	0.035129818	0.050143213	0.031889543	0.039197513	14	15	15
ENSG00000158882.8	TOMM40L	2.09321551	0.1402291	0.036329921	0.017347801	0.115559889	0.000915335	0.002461463	15	18	18
ENSG00000114650.14	SCAP	-2.092075645	-0.072122491	0.036431749	0.044212869	0.159826754	7.88E-05	0.000329938	12	18	18
ENSG00000186908.10	ZDHHC17	2.089418557	0.044578362	0.036670062	0.112602781	0.090257498	0.003617191	0.007354919	48	53	53
ENSG00000013810.14	TACC3	2.087311843	0.056806827	0.036859955	0.088439109	0.168918669	4.71E-05	0.000218247	31	34	34
ENSG00000177225.12	PDDC1	-2.084598913	-0.131335339	0.037105723	0.016470281	0.052328104	0.028286076	0.035866837	6	16	16
ENSG00000189350.8	FAM179A	-2.078719355	-0.034616879	0.037643153	0.20987777	0.468658082	5.31E-14	2.90E-12	21	23	23
ENSG00000151148.9	UBE3B	2.075514446	0.056882204	0.037938881	0.075670341	0.120035775	0.000716641	0.002038212	24	27	27
ENSG00000128595.12	CALU	2.069433943	0.077880033	0.038505384	0.034428906	0.070660857	0.010435357	0.016826992	11	13	13
ENSG00000142748.8	FCN3	2.067709816	0.276113734	0.038667318	0.00270507	0.069267391	0.011253024	0.017945131	3	3	3
ENSG00000187987.5	ZSCAN23	2.065007577	0.071977051	0.038922283	0.053160002	0.056941758	0.021980061	0.029795053	11	21	21
ENSG00000168646.8	AXIN2	-2.059044361	-0.669817021	0.039489989	0.000563804	0.048189982	0.035508383	0.042537733	1	1	1
ENSG00000126461.10	SCAF1	2.058997312	0.020387033	0.039494496	0.58447923	0.082412609	0.005527912	0.010273335	104	117	117
ENSG00000168374.6	ARF4	2.049986028	0.064854475	0.040365794	0.062848575	0.108330403	0.001357436	0.003390666	17	19	19
ENSG00000184445.7	KNTC1	-2.046625984	-0.055473063	0.040694822	0.167987681	0.095825001	0.002676105	0.005786105	41	49	49
ENSG00000065559.10	MAP2K4	2.045455217	1.49255133	0.04081	0.000159388	0.062493289	0.016248132	0.023762808	1	1	1
ENSG00000112624.8	GLTSCR1L	-2.037270198	-0.024032802	0.041622973	0.493964762	0.191781298	1.27E-05	7.29E-05	81	93	93
ENSG00000181315.6	ZNF322	-2.034111148	-0.054307279	0.04194039	0.079866614	0.093052143	0.003109586	0.006518794	62	69	69
ENSG00000165813.12	C10orf118	-2.03285508	-1.189887201	0.042067166	0.000183357	0.065797714	0.013580586	0.020778785	2	2	2
ENSG00000020922.8	MRE11A	2.031389023	0.074674841	0.042215547	0.037712276	0.133560778	0.000340728	0.001129327	28	32	32
ENSG00000004487.11	KDM1A	-2.029222997	-0.033498888	0.042435582	0.244007748	0.117916531	0.000804739	0.002226354	63	71	71
ENSG00000120306.5	CYSTM1	2.027018444	0.063575319	0.042660527	0.070521149	0.070868298	0.010318851	0.016703409	15	20	20
ENSG00000135698.5	MPHOSPH6	2.026873029	0.039826237	0.042675399	0.134984646	0.102964231	0.001817118	0.004283952	37	39	39
ENSG00000197959.9	DNM3	-2.022458825	-0.040804909	0.043128973	0.160912821	0.075860248	0.007877118	0.013530596	63	75	75
ENSG00000134077.11	THUMPD3	-2.022395863	-0.038981207	0.043135472	0.168734776	0.240167312	7.11E-07	5.98E-06	41	43	43
ENSG00000179627.9	ZBTB42	2.018593295	0.021491547	0.043529509	0.49564144	0.111860409	0.001120036	0.002887442	91	140	140
ENSG00000095906.12	NUBP2	2.013065893	0.079475578	0.044107698	0.038637508	0.059079965	0.019562369	0.027318863	10	11	11
ENSG00000139687.9	RB1	-2.011197484	-0.08636433	0.044304601	0.038406887	0.115769074	0.000904938	0.002440693	13	15	15
ENSG00000118162.9	KPTN	2.009757421	0.048470846	0.044456869	0.116138601	0.071700011	0.009864716	0.016161713	40	43	43
ENSG00000167550.6	RHEBL1	2.008733283	0.036284218	0.044565427	0.211433282	0.104755037	0.00164871	0.003955873	30	32	32
ENSG00000080007.6	DDX43	-2.005261568	-0.099372885	0.044935091	0.023404035	0.157484977	8.99E-05	0.000371658	25	28	28
ENSG00000164048.9	ZNF589	2.004955772	0.052067005	0.044967775	0.069016766	0.190543153	1.36E-05	7.71E-05	23	28	28
ENSG00000108187.11	PBLD	-2.000513614	-0.091950175	0.045444831	0.030745197	0.099129756	0.002237329	0.005049663	7	8	8
ENSG00000186204.10	CYP4F12	1.995464869	0.117233008	0.045992202	0.022642724	0.163129329	6.54E-05	0.000284209	11	21	21
ENSG00000173988.8	LRRC63	1.993977661	0.02084103	0.046154496	0.486505477	0.104351444	0.001685257	0.004030325	110	130	130
ENSG00000136425.8	CIB2	1.989252797	0.058700073	0.046673307	0.064203084	0.105458119	0.001586911	0.003848047	15	15	15
ENSG00000186496.6	ZNF396	-1.985489845	-1.208232864	0.047089999	0.000153649	0.071161499	0.010156407	0.016498963	1	1	1
ENSG00000232859.5	LYRM9	-1.97936198	-0.03752534	0.047775266	0.161730489	0.308811851	8.92E-09	1.21E-07	12	12	12
ENSG00000196821.5	C6orf106	-1.978034549	-0.070323078	0.047924809	0.063913277	0.143008276	0.000201883	0.000723376	23	26	26
ENSG00000167608.7	TMC4	1.976920414	0.083456831	0.048050627	0.027983269	0.135442688	0.00030708	0.001033557	17	19	19
ENSG00000091140.8	DLD	-1.974868551	-0.041156496	0.048283067	0.139304073	0.169723093	4.50E-05	0.000211448	37	42	42
ENSG00000149300.5	C11orf52	1.970676148	0.033042334	0.04876093	0.178409162	0.128041503	0.00046186	0.001452752	48	49	49
ENSG00000155393.8	HEATR3	1.968086505	0.034324044	0.049058085	0.185744634	0.219052201	2.55E-06	1.84E-05	38	38	38
ENSG00000197756.5	RPL37A	-1.967328188	-0.079108722	0.049145387	0.028975764	0.046639419	0.038679965	0.045413157	13	13	13
ENSG00000163516.9	ANKZF1	-1.967044185	-0.025815629	0.049178117	0.296659308	0.13053472	0.000402621	0.001294288	67	73	73
ENSG00000176597.7	B3GNT5	-1.966983433	-0.042311144	0.049185121	0.104324283	0.059781688	0.018829198	0.026538555	47	53	53
ENSG00000081377.12	CDC14B	-1.961181592	-0.02404697	0.049857843	0.306521342	0.132684296	0.000357618	0.00117718	83	96	96
ENSG00000137101.8	CD72	1.953208261	0.099772387	0.050794923	0.0362878	0.076738736	0.007511764	0.013037942	2	2	2
ENSG00000186314.7	PRELID2	1.946568412	0.027123205	0.051586499	0.297891764	0.054422559	0.025221945	0.032942724	62	70	70
ENSG00000011332.15	DPF1	1.942756076	0.033546393	0.052045637	0.218721037	0.107320962	0.001434064	0.003545691	43	61	61
ENSG00000001617.7	SEMA3F	-1.939573737	-0.027801672	0.052431515	0.25546414	0.225550885	1.72E-06	1.32E-05	47	71	71
ENSG00000153113.19	CAST	1.931867455	0.073873805	0.053375868	0.058516531	0.046952353	0.038017199	0.044797991	21	22	22
ENSG00000140287.6	HDC	1.922731215	0.071204037	0.054513814	0.032532401	0.049328433	0.033350786	0.040489377	14	17	17
ENSG00000168653.6	NDUFS5	1.919090591	0.042068155	0.05497287	0.138110886	0.068383075	0.011805069	0.018598226	68	82	82
ENSG00000132141.9	CCT6B	-1.916994466	-0.101385918	0.055238635	0.019887706	0.049695117	0.032684858	0.039906446	2	2	2
ENSG00000257335.4	MGAM	1.916964727	0.046545486	0.055242413	0.10763699	0.137046602	0.000281008	0.000958168	46	61	61
ENSG00000198467.9	TPM2	-1.9134733	-0.040231691	0.055687488	0.101872726	0.099200966	0.002228708	0.005033338	26	28	28
ENSG00000240344.4	PPIL3	1.910730367	0.026497247	0.05603924	0.293688772	0.515300113	8.12E-16	7.06E-14	23	23	23
ENSG00000198937.8	CCDC167	1.909483049	0.034697624	0.056199806	0.160669905	0.255400777	2.78E-07	2.61E-06	31	34	34
ENSG00000170791.13	CHCHD7	1.904309672	1.304934783	0.056869865	0.000156511	0.099736598	0.00216491	0.004922743	2	2	2
ENSG00000141574.3	SECTM1	-1.903510929	-0.021982724	0.056973909	0.487599689	0.124371448	0.000565055	0.001707622	92	130	130
ENSG00000116791.9	CRYZ	-1.902317868	-0.039633743	0.057129611	0.125010856	0.115101132	0.000938553	0.002507281	42	48	48
ENSG00000182993.3	C12orf60	1.900011272	0.068388729	0.05743164	0.039459284	0.180873817	2.38E-05	0.000123244	5	6	6
ENSG00000188827.6	SLX4	1.898779605	0.033742933	0.05759346	0.177416031	0.097499898	0.002443973	0.005425545	43	53	53
ENSG00000186326.3	RGS9BP	1.898119319	0.03970866	0.057680366	0.137355196	0.071799829	0.00981158	0.016132559	46	53	53
ENSG00000268948.1	AC004017.1	1.894601548	0.127290736	0.05814521	0.012338625	0.048142191	0.035602029	0.042585408	5	9	9
ENSG00000189298.9	ZKSCAN3	-1.8937782	-0.047471126	0.058254456	0.099530381	0.132210883	0.000367082	0.001200113	48	53	53
ENSG00000121940.11	CLCC1	1.891557217	1.272925132	0.058550001	0.000149161	0.055393669	0.023918215	0.03176208	1	1	1
ENSG00000141504.7	SAT2	-1.889450344	-0.025637912	0.05883151	0.31687202	0.149580236	0.000139968	0.00053244	60	70	70
ENSG00000146205.9	ANO7	-1.888162919	-0.042206754	0.059004082	0.075318823	0.259193631	2.19E-07	2.13E-06	4	5	5
ENSG00000135094.6	SDS	1.886689328	0.058856334	0.059202124	0.061804992	0.121210589	0.000671988	0.001946072	12	14	14
ENSG00000108523.11	RNF167	-1.886100174	-0.153396061	0.059281457	0.006042101	0.045488865	0.041220799	0.047818345	2	2	2
ENSG00000100099.16	HPS4	1.884424237	0.506820891	0.059507614	0.000893865	0.056289338	0.02277661	0.030611878	2	2	2
ENSG00000135604.9	STX11	1.881415231	0.074499813	0.059915457	0.073131385	0.15682492	9.33E-05	0.00038397	6	8	8
ENSG00000125912.6	NCLN	-1.87640271	-0.025857942	0.060600003	0.322185762	0.196837532	9.44E-06	5.68E-05	58	71	71
ENSG00000256073.2	C21orf119	1.871593312	0.084437335	0.061262889	0.033060848	0.088315828	0.004017689	0.008017483	4	4	4
ENSG00000097046.8	CDC7	1.868583401	0.050684186	0.061680797	0.072871788	0.247637829	4.49E-07	3.95E-06	39	49	49
ENSG00000148303.12	RPL7A	-1.86554076	-0.029716742	0.062105644	0.242590013	0.097908784	0.002390414	0.005342207	74	82	82
ENSG00000152291.9	TGOLN2	-1.864687674	-0.100903216	0.062225195	0.021599045	0.075877683	0.007869696	0.013530577	8	12	12
ENSG00000089737.11	DDX24	-1.864019796	-0.085996398	0.062318924	0.027399331	0.07145519	0.009996267	0.016327671	17	18	18
ENSG00000119725.13	ZNF410	-1.863063466	-0.329661633	0.062453338	0.001659838	0.083521585	0.005206327	0.009820622	3	3	3
ENSG00000129535.8	NRL	1.855930991	0.039385393	0.063463395	0.116734816	0.124753988	0.000553314	0.001685253	33	36	36
ENSG00000125814.13	NAPB	1.855556479	0.026949117	0.063516802	0.295777053	0.344248268	7.94E-10	1.53E-08	54	61	61
ENSG00000101470.5	TNNC2	-1.855208618	-0.164507765	0.063566442	0.00762065	0.073787922	0.008811154	0.014834362	11	14	14
ENSG00000100368.9	CSF2RB	1.85509211	0.030673923	0.063583074	0.227178987	0.149794772	0.0001383	0.000528296	58	63	63
ENSG00000258289.3	CHURC1	-1.85490176	-0.021064534	0.063610257	0.396943855	0.572675954	2.66E-18	5.12E-16	58	63	63
ENSG00000176783.10	RUFY1	1.84885616	0.036546287	0.064478586	0.140661798	0.061530935	0.017120403	0.024711911	38	56	56
ENSG00000117877.6	CD3EAP	1.845011229	0.023950617	0.065035905	0.308283026	0.426659462	1.70E-12	6.61E-11	36	42	42
ENSG00000048544.5	MRPS10	-1.84493688	-0.0461714	0.065046721	0.094260493	0.168977004	4.69E-05	0.00021784	35	37	37
ENSG00000181061.9	HIGD1A	-1.842929911	-0.033377385	0.065339244	0.147380956	0.283982691	4.54E-08	5.27E-07	20	24	24
ENSG00000126088.8	UROD	1.841068944	0.024492327	0.065611456	0.093532094	0.056872392	0.022063388	0.029852602	19	24	24
ENSG00000099817.7	POLR2E	-1.840571735	-0.033312437	0.065684343	0.170150595	0.203812012	6.28E-06	4.03E-05	31	38	38
ENSG00000228696.4	ARL17B	1.840442564	0.057683822	0.065703289	0.045383525	0.080060795	0.006277127	0.011317888	16	20	20
ENSG00000113621.10	TXNDC15	-1.836710177	-0.041045502	0.066252692	0.108436295	0.049842702	0.032420692	0.039636922	27	29	29
ENSG00000164597.9	COG5	-1.836187444	-0.16285337	0.066329939	0.00709405	0.044799827	0.042824252	0.049043524	3	4	4
ENSG00000142065.9	ZFP14	-1.835898231	-0.036144399	0.066372709	0.131468268	0.188174067	1.56E-05	8.68E-05	31	40	40
ENSG00000180329.9	CCDC43	-1.832072421	-0.034413572	0.066940632	0.150539067	0.118982324	0.00075917	0.002121626	36	48	48
ENSG00000150783.5	TEX12	-1.822642681	-0.024586743	0.068357527	0.336973813	0.09621251	0.00262052	0.005709872	70	85	85
ENSG00000141076.13	CIRH1A	1.822017058	0.030195441	0.068452397	0.186591148	0.178888076	2.67E-05	0.000135427	67	76	76
ENSG00000111906.13	HDDC2	1.820636119	0.027199225	0.068662189	0.276466177	0.121157526	0.000673944	0.001948647	59	69	69
ENSG00000214999.3	AC129492.6	1.819766029	0.026721836	0.068794643	0.286784559	0.175608431	3.22E-05	0.0001579	58	70	70
ENSG00000166847.5	DCTN5	1.819540785	0.063852311	0.068828966	0.055698688	0.062323304	0.016398869	0.023887276	14	14	14
ENSG00000122507.16	BBS9	1.814982461	0.103630752	0.069526605	0.01880347	0.066322392	0.013199698	0.020287588	8	9	9
ENSG00000105792.15	C7orf63	1.813163317	0.070646351	0.069806636	0.03455678	0.064853366	0.014294295	0.021615161	8	9	9
ENSG00000196199.9	MPHOSPH8	-1.806392459	-0.052183704	0.070857059	0.097287788	0.08728027	0.004249064	0.008378479	37	40	40
ENSG00000037474.10	NSUN2	1.80417739	0.028475341	0.071203503	0.209326243	0.447782406	3.07E-13	1.35E-11	13	15	15
ENSG00000081842.13	PCDHA6	1.799647573	0.056520217	0.071916304	0.053984868	0.143379907	0.000197754	0.000710797	7	7	7
ENSG00000177943.9	MAMDC4	-1.797891015	-0.042681267	0.07219428	0.135136794	0.052049764	0.02872096	0.036242094	45	65	65
ENSG00000076382.12	SPAG5	1.796955581	0.018528568	0.072342672	0.627325254	0.116810698	0.000854883	0.002340257	80	92	92
ENSG00000180535.3	BHLHA15	1.792671258	0.029242625	0.073025505	0.199893923	0.369587278	1.30E-10	3.22E-09	48	53	53
ENSG00000122970.11	IFT81	-1.790781607	-0.038344028	0.073328348	0.1106438	0.06785854	0.012145318	0.019027402	26	30	30
ENSG00000162378.8	ZYG11B	-1.790273917	-0.088412062	0.073409887	0.02382149	0.044338362	0.04393401	0.049965864	12	16	16
ENSG00000172239.9	PAIP1	1.787001181	0.03358088	0.073937298	0.159087421	0.136508889	0.000289495	0.000981609	63	76	76
ENSG00000244005.8	NFS1	1.786464866	0.053071249	0.074024021	0.071655343	0.060359223	0.018246713	0.025917638	16	21	21
ENSG00000037042.8	TUBG2	1.785682207	0.074170392	0.074150728	0.031879703	0.219938983	2.41E-06	1.76E-05	7	10	10
ENSG00000149136.3	SSRP1	-1.785068209	-0.068437575	0.074250254	0.038657355	0.047556451	0.03677062	0.043639236	44	49	49
ENSG00000127922.5	SHFM1	1.783353356	0.036483621	0.074528801	0.131357191	0.117439742	0.000825992	0.002274809	33	36	36
ENSG00000130540.9	SULT4A1	1.782684039	0.047873113	0.074637751	0.07972701	0.152313845	0.000120121	0.00047321	17	18	18
ENSG00000120370.8	GORAB	1.780693989	0.062062636	0.074962456	0.048238818	0.056982431	0.02193135	0.029758072	17	19	19
ENSG00000144029.7	MRPS5	1.779154937	0.045241651	0.075214364	0.07715891	0.06395136	0.015011347	0.022448476	17	32	32
ENSG00000141540.6	TTYH2	-1.778607471	-0.044131628	0.075304138	0.086303515	0.074490132	0.008482825	0.014384686	20	21	21
ENSG00000151789.5	ZNF385D	-1.775501522	-0.04838092	0.075815114	0.074253065	0.066184581	0.013298686	0.020422539	21	22	22
ENSG00000091704.5	CPA1	-1.774668232	-1.183603322	0.075952684	0.000219097	0.080220092	0.006223318	0.011245236	4	4	4
ENSG00000182218.5	HHIPL1	1.773362634	0.021271656	0.076168636	0.40009602	0.07384838	0.008782391	0.014800171	91	99	99
ENSG00000127399.10	LRRC61	-1.771200452	-0.023199726	0.076527374	0.327072574	0.4609333	1.02E-13	4.86E-12	45	52	52
ENSG00000164323.8	KIAA1430	1.770398777	0.055575041	0.076660733	0.050300877	0.118279867	0.000788908	0.002190855	7	9	9
ENSG00000162994.11	CLHC1	-1.764883768	-0.033888133	0.077583302	0.148987801	0.202406423	6.82E-06	4.31E-05	15	15	15
ENSG00000146352.8	CLVS2	1.763561442	0.050385188	0.077805844	0.065981692	0.046681613	0.038589913	0.04534252	22	25	25
ENSG00000155111.10	CDK19	1.762182368	0.043822639	0.07803849	0.120539178	0.1312964	0.000386069	0.001248772	51	57	57
ENSG00000175634.10	RPS6KB2	-1.757550376	-0.058069485	0.078824043	0.064695856	0.056568327	0.022432456	0.030262266	18	29	29
ENSG00000182183.10	FAM159A	-1.75204891	-0.06015124	0.079765398	0.063998743	0.120713303	0.000690542	0.001982513	16	16	16
ENSG00000104886.5	PLEKHJ1	-1.751442557	-0.021153684	0.079869708	0.400798015	0.056490465	0.02252797	0.030379894	80	109	109
ENSG00000104369.4	JPH1	-1.748131538	-0.059014222	0.080441253	0.041704685	0.15695145	9.26E-05	0.00038168	12	15	15
ENSG00000143156.9	NME7	1.747313458	0.032616637	0.08058298	0.177021124	0.157142376	9.16E-05	0.000378031	47	53	53
ENSG00000197748.8	WDR96	-1.745479611	-0.071186249	0.080901418	0.050874538	0.075352259	0.008096459	0.013848736	11	11	11
ENSG00000167513.4	CDT1	-1.744850102	-0.037128832	0.081010965	0.126315773	0.114596908	0.000964744	0.00256249	45	62	62
ENSG00000171049.8	FPR2	1.744098363	0.05891404	0.08114194	0.05161212	0.094999616	0.002798438	0.005980266	12	12	12
ENSG00000132294.9	EFR3A	1.742892197	0.023681149	0.081352447	0.255094386	0.047478913	0.036928243	0.043770329	55	66	66
ENSG00000170324.15	FRMPD2	-1.742368746	-0.02756384	0.081443941	0.251947608	0.218247871	2.67E-06	1.92E-05	48	53	53
ENSG00000099940.7	SNAP29	-1.742143662	-0.038698132	0.081483309	0.12679433	0.333833918	1.64E-09	2.83E-08	11	19	19
ENSG00000120071.8	KANSL1	-1.740760689	-0.02454872	0.081725535	0.22887394	0.189361777	1.46E-05	8.19E-05	51	62	62
ENSG00000197405.3	C5AR1	-1.737715897	-0.244263506	0.082260886	0.001741218	0.059407667	0.019216446	0.026938797	3	3	3
ENSG00000162461.7	SLC25A34	-1.733635472	-0.056804879	0.082982782	0.051727017	0.16433948	6.11E-05	0.000270567	3	3	3
ENSG00000105711.6	SCN1B	-1.731863439	-0.01653234	0.08329788	0.615824495	0.148919406	0.000145231	0.000549599	94	109	109
ENSG00000180817.7	PPA1	-1.730398478	-0.04559291	0.083559106	0.085928798	0.08892705	0.003887065	0.007803726	36	41	41
ENSG00000107159.8	CA9	1.72824616	0.039754831	0.083944101	0.090614166	0.099618706	0.002178794	0.004945077	43	44	44
ENSG00000100814.13	CCNB1IP1	1.728101611	0.532107388	0.083970009	0.000605246	0.073393084	0.009001338	0.015113347	1	1	1
ENSG00000163933.5	RFT1	1.728101058	0.043133339	0.083970108	0.088413039	0.192413967	1.22E-05	7.04E-05	16	18	18
ENSG00000162869.11	PPP1R21	1.725685727	0.045576619	0.084403967	0.07833747	0.105874692	0.001551386	0.00378452	31	31	31
ENSG00000064270.8	ATP2C2	1.717395401	0.017220917	0.085906951	0.625434997	0.202677641	6.71E-06	4.25E-05	107	118	118
ENSG00000154016.9	GRAP	1.714777098	0.061043031	0.086386102	0.055655113	0.053081263	0.027142731	0.034718447	10	19	19
ENSG00000138061.7	CYP1B1	1.713516945	0.067597137	0.086617479	0.028070116	0.064629816	0.014468718	0.021833711	10	10	10
ENSG00000136378.10	ADAMTS7	-1.710280186	-0.082210667	0.087214074	0.033337178	0.134467798	0.000324079	0.001082789	18	25	25
ENSG00000039650.5	PNKP	1.70994052	0.0507546	0.087276873	0.067196551	0.145024336	0.000180463	0.000656908	13	13	13
ENSG00000173868.7	PHOSPHO1	-1.709761381	-1.633058813	0.087310007	0.000130153	0.100844834	0.002038614	0.004688106	1	1	1
ENSG00000080546.9	SESN1	-1.708523845	-0.036087622	0.087539186	0.146553735	0.059460045	0.019161733	0.026903408	40	52	52
ENSG00000130312.2	MRPL34	-1.708451815	-0.031037724	0.08755254	0.171030006	0.379633751	6.25E-11	1.67E-09	30	31	31
ENSG00000144021.2	CIAO1	-1.708325686	-0.137785585	0.087575928	0.006289687	0.071293926	0.010083882	0.016424987	6	7	7
ENSG00000076650.2	GPATCH1	1.708255042	0.033665255	0.087589029	0.18578997	0.07331655	0.009038676	0.01513396	46	49	49
ENSG00000186575.13	NF2	1.706302993	0.084120589	0.087951681	0.04009623	0.095992212	0.002651977	0.005761227	7	9	9
ENSG00000145911.5	N4BP3	1.705497992	0.046838168	0.088101586	0.072701237	0.045007872	0.04233344	0.048694781	28	33	33
ENSG00000146223.10	RPL7L1	-1.704221856	-0.042384313	0.088339648	0.089851297	0.103138267	0.001800029	0.004257406	21	23	23
ENSG00000196118.7	C16orf93	1.702320481	0.017171705	0.088695307	0.614012541	0.478665625	2.23E-14	1.34E-12	57	72	72
ENSG00000165609.8	NUDT5	1.702299656	0.053387093	0.088699209	0.055083813	0.156049517	9.74E-05	0.000397041	27	34	34
ENSG00000158828.5	PINK1	-1.699244426	-0.050460622	0.089273139	0.04975721	0.115491651	0.000918753	0.002467019	20	22	22
ENSG00000075131.5	TIPIN	-1.693898582	-0.035071723	0.090284557	0.163229661	0.253836857	3.06E-07	2.84E-06	28	31	31
ENSG00000021300.9	PLEKHB1	-1.687621987	-0.07282308	0.091483816	0.033368659	0.044388145	0.043812874	0.049874695	17	19	19
ENSG00000065883.10	CDK13	-1.686855003	-0.034835031	0.091631236	0.166228507	0.06331727	0.015537066	0.0229992	44	50	50
ENSG00000178038.12	ALS2CL	-1.686363046	-0.03963135	0.091725894	0.125997803	0.176759944	3.01E-05	0.000150057	18	19	19
ENSG00000131196.13	NFATC1	-1.68575486	-0.024434877	0.091843026	0.3544921	0.116392487	0.000874642	0.002376533	71	98	98
ENSG00000152527.9	PLEKHH2	-1.685629597	-0.044726465	0.091867165	0.077671515	0.044506365	0.043526588	0.049688198	27	30	30
ENSG00000107731.8	UNC5B	-1.682284486	-0.045726718	0.092513688	0.058755187	0.091011947	0.003472538	0.007120262	26	27	27
ENSG00000219607.2	PPP1R3G	-1.681530118	-0.380723955	0.092659991	0.002049677	0.052029329	0.028753156	0.036245149	1	2	2
ENSG00000106245.5	BUD31	1.680767716	0.049428935	0.092808042	0.073645649	0.048181016	0.035525932	0.042537733	36	38	38
ENSG00000166025.13	AMOTL1	-1.679128756	-0.053982311	0.093126953	0.064552413	0.101526532	0.001964592	0.004569679	20	23	23
ENSG00000143340.6	FAM163A	-1.677818737	-0.043271698	0.09338249	0.072638363	0.099764877	0.002161593	0.004918262	20	20	20
ENSG00000163913.7	IFT122	1.677253836	0.055696301	0.093492856	0.07769375	0.15163804	0.000124753	0.000487251	33	33	33
ENSG00000117308.10	GALE	-1.676407612	-0.126202392	0.093658379	0.012160544	0.078229426	0.006930229	0.012243906	7	9	9
ENSG00000156873.11	PHKG2	1.67639935	0.62775317	0.093659996	0.00043693	0.066435314	0.013119141	0.020197778	1	1	1
ENSG00000188690.8	UROS	1.673437788	0.030224969	0.094241144	0.185688884	0.450928893	2.37E-13	1.07E-11	17	19	19
ENSG00000151575.10	TEX9	1.672264681	0.041904581	0.094472141	0.113335583	0.045902558	0.040287978	0.046987843	45	51	51
ENSG00000163359.11	COL6A3	1.669106598	0.01833827	0.095096256	0.509210226	0.116977264	0.000847137	0.002322534	113	127	127
ENSG00000128944.9	KNSTRN	-1.664763777	-0.01783173	0.095959893	0.369786366	0.519129596	5.66E-16	5.17E-14	46	51	51
ENSG00000176681.10	LRRC37A	-1.66190416	-0.04991406	0.096531992	0.110791688	0.555022284	1.67E-17	2.18E-15	28	42	42
ENSG00000089693.6	MLF2	-1.660025755	-0.020777212	0.096909271	0.318154823	0.160852068	7.43E-05	0.000314222	52	94	94
ENSG00000241404.2	EGFL8	-1.659475565	-1.074906921	0.09702	0.000169252	0.054335891	0.025341762	0.033035524	1	1	1
ENSG00000169925.12	BRD3	1.654749201	0.019278121	0.097975382	0.430045355	0.172923421	3.75E-05	0.000179467	107	119	119
ENSG00000177239.10	MAN1B1	1.65375897	0.047615442	0.098176496	0.09569104	0.209855941	4.40E-06	2.98E-05	20	28	28
ENSG00000185798.6	WDR53	-1.653441387	-0.062288204	0.098241066	0.057014608	0.073349184	0.009022736	0.01513396	19	28	28
ENSG00000059122.12	FLYWCH1	1.652211073	0.024322069	0.09849153	0.292751437	0.4883829	9.48E-15	6.30E-13	18	18	18
ENSG00000124787.9	RPP40	1.649027383	0.059080591	0.099142025	0.047498419	0.086760053	0.004370265	0.008585019	13	14	14
ENSG00000155530.2	LRGUK	-1.646232459	-0.022678689	0.099715909	0.364287278	0.121881881	0.00064772	0.001892301	84	93	93
ENSG00000164366.3	CCDC127	1.644669369	0.097530305	0.100038013	0.020272057	0.07515643	0.008182642	0.013969975	7	10	10
ENSG00000172890.7	NADSYN1	1.642813425	0.01840717	0.100421542	0.380315057	0.089994388	0.003669037	0.007447899	74	88	88
ENSG00000113716.8	HMGXB3	1.641698108	0.025108762	0.100652584	0.212090387	0.070982932	0.010255031	0.016629586	57	57	57
ENSG00000103494.8	RPGRIP1L	-1.639458765	-0.07444912	0.101117752	0.034568891	0.050431795	0.031387866	0.038698096	9	9	9
ENSG00000129194.3	SOX15	-1.636780074	-0.047610083	0.101676431	0.071366305	0.053176808	0.027001097	0.034561494	36	40	40
ENSG00000133874.1	RNF122	-1.636215057	-0.027106272	0.101794586	0.172158323	0.240396422	7.01E-07	5.91E-06	36	50	50
ENSG00000182698.7	RESP18	1.635738391	0.015868908	0.101894351	0.848091069	0.33427668	1.59E-09	2.77E-08	154	169	169
ENSG00000137601.11	NEK1	1.635145197	0.018750547	0.102018613	0.631148902	0.120823489	0.000686388	0.001974514	149	165	165
ENSG00000151929.5	BAG3	1.631331176	0.881193976	0.102820458	0.000205125	0.083561743	0.00519504	0.009809463	2	2	2
ENSG00000105520.6	DKFZP761J1410	-1.631291629	-0.036901229	0.102828799	0.120424937	0.127185077	0.000484135	0.001503391	29	37	37
ENSG00000241878.5	PISD	-1.631052308	-0.054180254	0.102879283	0.082706174	0.065197548	0.014029891	0.021312417	20	21	21
ENSG00000230873.4	STMND1	-1.630882532	-0.07981872	0.102915108	0.032603208	0.051018033	0.030393468	0.03782971	19	19	19
ENSG00000108439.5	PNPO	1.630734174	0.026847216	0.102946422	0.181822682	0.087931368	0.004102085	0.00815027	48	54	54
ENSG00000175264.3	CHST1	-1.630696172	-0.026220221	0.102954445	0.210843667	0.089546239	0.003759056	0.007601056	42	45	45
ENSG00000102904.10	TSNAXIP1	1.6223119	0.044430048	0.104736582	0.090268257	0.172683068	3.80E-05	0.00018123	14	18	18
ENSG00000161551.8	ZNF577	-1.616113354	-0.030525704	0.106069808	0.207612651	0.251396038	3.56E-07	3.24E-06	86	88	88
ENSG00000167600.9	CYP2S1	-1.61522251	-0.047376137	0.106262518	0.06675303	0.068094283	0.011991194	0.018826326	27	31	31
ENSG00000187824.4	TMEM220	1.614551767	0.021609226	0.106407798	0.336790632	0.265047311	1.52E-07	1.55E-06	74	80	80
ENSG00000140092.10	FBLN5	1.612555182	0.017504872	0.106841182	0.469879583	0.071174247	0.010149402	0.016494922	96	100	100
ENSG00000068383.14	INPP5A	-1.611049819	-0.068935823	0.107168864	0.031975847	0.044896631	0.042595149	0.048869328	8	12	12
ENSG00000164402.9	Sep-08	-1.610906959	-0.970347668	0.107200003	0.000137139	0.082825785	0.005405841	0.01011338	1	1	1
ENSG00000152454.3	ZNF256	1.610359492	0.061610293	0.107319398	0.036632889	0.048257585	0.035376346	0.042440568	23	26	26
ENSG00000138382.9	METTL5	-1.608617544	-0.324466314	0.107699996	0.001174151	0.085611686	0.004650166	0.009004086	1	1	1
ENSG00000167992.8	VWCE	-1.608434373	-0.025899699	0.107740079	0.226662683	0.049409475	0.03320242	0.040403279	52	61	61
ENSG00000157593.12	SLC35B2	-1.608432744	-0.016789246	0.107740435	0.37860877	0.192564542	1.21E-05	7.00E-05	95	101	101
ENSG00000108465.10	CDK5RAP3	-1.607887863	-0.042618983	0.10785974	0.084386567	0.201075166	7.37E-06	4.61E-05	20	21	21
ENSG00000212643.1	ZRSR1	-1.605559973	-0.049399032	0.108370626	0.050074889	0.11835373	0.000785728	0.002183684	30	34	34
ENSG00000164808.12	SPIDR	1.603970643	0.027408802	0.108720524	0.201732704	0.269147464	1.17E-07	1.25E-06	59	74	74
ENSG00000163918.6	RFC4	1.603418801	0.021566593	0.108842223	0.33957829	0.137715567	0.000270791	0.000925924	74	77	77
ENSG00000213888.2	AC005003.1	1.60211828	0.01413881	0.109129456	0.62346336	0.139274182	0.000248387	0.000858969	96	114	114
ENSG00000227450.2	CTB-58E17.5	1.597133048	0.059095421	0.110236053	0.040574028	0.062173171	0.016533179	0.024064041	14	15	15
ENSG00000129347.15	KRI1	-1.594997597	-0.02340421	0.110712773	0.282527174	0.274486458	8.35E-08	9.05E-07	26	31	31
ENSG00000144736.9	SHQ1	1.592862694	0.0518509	0.111190997	0.051982256	0.116714418	0.000859392	0.00234796	14	15	15
ENSG00000125651.9	GTF2F1	-1.592822552	-0.383077628	0.111200004	0.00061502	0.052649952	0.027791589	0.035387273	1	1	1
ENSG00000185989.9	RASA3	-1.592117312	-0.025920241	0.111358348	0.251375932	0.237126221	8.56E-07	6.98E-06	50	102	102
ENSG00000139613.7	SMARCC2	-1.591085925	-0.080549141	0.11159024	0.024645499	0.055688439	0.023536217	0.031414737	11	13	13
ENSG00000119139.12	TJP2	1.591042519	1.05183411	0.111600007	0.000138476	0.073780133	0.008814867	0.014834362	1	1	1
ENSG00000182827.8	ACBD3	1.589366253	0.042976808	0.111977729	0.084502716	0.071180098	0.010146189	0.016494922	28	32	32
ENSG00000090238.7	YPEL3	1.587193354	0.041127368	0.11246886	0.058409136	0.059452352	0.019169759	0.026904333	15	27	27
ENSG00000107738.15	C10orf54	1.586840158	0.035265403	0.112548851	0.125707824	0.067097892	0.012656357	0.019592671	40	41	41
ENSG00000162623.11	TYW3	-1.585236296	-0.031446268	0.112912657	0.176560046	0.279727502	5.97E-08	6.75E-07	30	33	33
ENSG00000259658.3	RP11-89K11.1	-1.585105719	-0.043141726	0.112942316	0.139364555	0.048505632	0.034896185	0.04197484	29	33	33
ENSG00000136631.8	VPS45	1.581985158	0.074014182	0.113652959	0.022559138	0.082517571	0.005496643	0.01023606	37	56	56
ENSG00000090263.11	MRPS33	1.580670891	0.056280242	0.113953307	0.060302796	0.096083226	0.002638936	0.005739724	13	14	14
ENSG00000090621.9	PABPC4	-1.580293126	-0.026325289	0.114039753	0.111759549	0.088959246	0.003880303	0.007794435	30	39	39
ENSG00000101307.11	SIRPB1	1.57874052	0.075455483	0.114395586	0.03583731	0.317877402	4.86E-09	7.22E-08	8	17	17
ENSG00000182175.9	RGMA	-1.577884191	-0.02391477	0.114592218	0.278421537	0.233182735	1.09E-06	8.67E-06	58	68	68
ENSG00000144043.7	TEX261	-1.576204736	-0.030632077	0.114978628	0.169435891	0.146643603	0.000164895	0.000612587	42	47	47
ENSG00000149582.11	TMEM25	1.574880853	0.036690059	0.115283949	0.08287428	0.09351996	0.003031836	0.006377771	37	37	37
ENSG00000140265.8	ZSCAN29	-1.573709906	-0.023343811	0.115554531	0.182923104	0.232043597	1.17E-06	9.23E-06	26	34	34
ENSG00000116984.8	MTR	-1.573332536	-0.039796839	0.115641839	0.069563062	0.094223507	0.002918538	0.006200153	25	28	28
ENSG00000122042.9	UBL3	-1.573108234	-0.031087089	0.115693759	0.120131188	0.078185739	0.006946613	0.012266917	55	58	58
ENSG00000107890.12	ANKRD26	1.572842593	0.018091118	0.115755271	0.365165812	0.164491871	6.05E-05	0.000269225	98	112	112
ENSG00000153044.5	CENPH	-1.571004885	-0.838038862	0.116181514	0.000198141	0.052537725	0.027963005	0.035543573	5	5	5
ENSG00000117305.10	HMGCL	1.567434048	0.040930687	0.117013271	0.08925831	0.053743431	0.026176513	0.033790273	24	28	28
ENSG00000103485.13	QPRT	-1.566625291	-0.035473799	0.117202303	0.123285775	0.180737183	2.40E-05	0.000123689	20	26	26
ENSG00000197822.6	OCLN	1.565428763	0.052343058	0.117482408	0.052545897	0.169230753	4.63E-05	0.000215506	17	27	27
ENSG00000167768.4	KRT1	-1.565159288	-0.02367002	0.117545565	0.219724115	0.045681715	0.040783209	0.047422027	65	70	70
ENSG00000145284.7	SCD5	1.560730447	0.038309006	0.118587364	0.088874299	0.180791635	2.39E-05	0.000123543	15	19	19
ENSG00000127588.4	GNG13	-1.558392228	-0.034737353	0.119140298	0.139345145	0.113597188	0.001018833	0.002680567	35	43	43
ENSG00000167695.10	FAM57A	1.558294197	0.038595469	0.119163524	0.084947369	0.137341111	0.000276464	0.000943555	21	23	23
ENSG00000102595.14	UGGT2	-1.552883399	-0.057903579	0.120450994	0.046884336	0.095676658	0.002697692	0.005818999	10	12	12
ENSG00000139546.6	TARBP2	1.552104827	0.252536395	0.120637143	0.002373595	0.047618297	0.036645394	0.043548149	8	10	10
ENSG00000113811.6	SELK	-1.549987384	-0.042441719	0.121144544	0.138049815	0.05821368	0.020507563	0.028378375	66	73	73
ENSG00000182919.10	C11orf54	1.547829056	0.045146034	0.121663459	0.073355673	0.153143391	0.000114667	0.000454173	21	24	24
ENSG00000135720.8	DYNC1LI2	-1.546881207	-0.032494456	0.121891894	0.107993552	0.093011587	0.003116419	0.006525626	33	37	37
ENSG00000174348.9	PODN	-1.546569304	-0.03788671	0.121967136	0.129453284	0.049305554	0.033392794	0.040499986	44	48	48
ENSG00000134014.12	ELP3	1.545774483	0.041436241	0.122159042	0.077303738	0.13180573	0.000375377	0.00122212	18	18	18
ENSG00000157823.12	AP3S2	1.545389757	0.031548273	0.122252016	0.125175593	0.281535742	5.32E-08	6.09E-07	30	31	31
ENSG00000143947.8	RPS27A	-1.545327032	-0.02859238	0.12226718	0.143040562	0.076975695	0.007416157	0.012902662	55	55	55
ENSG00000155792.5	DEPTOR	-1.545035973	-0.052852576	0.122337562	0.046646291	0.044997233	0.042358397	0.048694781	23	30	30
ENSG00000103549.17	RNF40	-1.543291577	-0.039700765	0.122760046	0.091139422	0.163145617	6.53E-05	0.000284209	18	21	21
ENSG00000083838.11	ZNF446	1.542965607	0.022796913	0.122839121	0.276597894	0.064393558	0.014655392	0.022051621	62	75	75
ENSG00000157837.11	SPPL3	-1.541254732	-0.036802007	0.123254801	0.114863893	0.055906964	0.023257038	0.031147961	24	28	28
ENSG00000196683.6	TOMM7	1.541120667	0.036834602	0.123287421	0.106956828	0.192597336	1.21E-05	7.00E-05	25	26	26
ENSG00000138798.7	EGF	1.5394274	0.536951561	0.123699989	0.000465792	0.064092549	0.014896755	0.022341152	1	1	1
ENSG00000128536.11	CDHR3	1.539269478	0.04551909	0.123738522	0.060461182	0.067595598	0.01231958	0.019177004	15	18	18
ENSG00000030110.8	BAK1	-1.538985506	-0.0360337	0.123807835	0.121075755	0.052066998	0.028693837	0.036232909	47	60	60
ENSG00000149599.11	DUSP15	-1.538977077	-0.070363665	0.123809893	0.031142057	0.05714528	0.021737418	0.029564908	18	23	23
ENSG00000173531.11	MST1	1.537296044	0.038651559	0.12422083	0.111472006	0.149498728	0.000140607	0.000534313	33	44	44
ENSG00000123179.9	EBPL	1.536480841	0.024326133	0.124420493	0.21756531	0.462990195	8.60E-14	4.36E-12	25	28	28
ENSG00000172782.7	FADS6	1.53628853	0.022312176	0.124467631	0.251188868	0.101187522	0.002001064	0.004627982	50	52	52
ENSG00000105185.7	PDCD5	1.535487119	0.017675753	0.124664219	0.420727942	0.228721002	1.42E-06	1.11E-05	79	90	90
ENSG00000153495.6	TEX29	1.53473544	0.019884698	0.124848827	0.399652978	0.507643858	1.66E-15	1.29E-13	57	73	73
ENSG00000007129.13	CEACAM21	1.534577628	0.035733871	0.124887611	0.147149514	0.061301482	0.017335283	0.02492356	52	62	62
ENSG00000144655.10	CSRNP1	-1.533236063	-0.025397252	0.125217702	0.174440231	0.094208117	0.002920971	0.00620072	42	45	45
ENSG00000176095.7	IP6K1	1.533003176	0.054686856	0.125275072	0.052572514	0.150666339	0.000131723	0.000508501	19	24	24
ENSG00000142675.13	CNKSR1	1.53283838	0.015409014	0.125315681	0.687293988	0.626922801	5.66E-21	2.96E-18	55	67	67
ENSG00000143994.9	ABHD1	1.531893131	0.03454399	0.125548809	0.095343763	0.082188691	0.005595215	0.010372022	13	15	15
ENSG00000135045.6	C9orf40	1.531867469	0.042945545	0.125555143	0.065416599	0.122397801	0.000629661	0.001860377	10	11	11
ENSG00000250565.2	ATP6V1E2	-1.531592077	-0.015552774	0.125623129	0.585518735	0.209541688	4.48E-06	3.02E-05	102	105	105
ENSG00000231500.2	RPS18	1.531155418	0.054447131	0.125730986	0.080559355	0.123402931	0.000595895	0.001777874	4	9	9
ENSG00000163636.6	PSMD6	1.529886359	0.052354519	0.126044861	0.041773716	0.097943751	0.002385889	0.005335521	8	8	8
ENSG00000137513.5	NARS2	-1.529766915	-0.058027226	0.126074434	0.04106882	0.086286123	0.004483682	0.008746652	11	11	11
ENSG00000138696.6	BMPR1B	-1.528387752	-0.042141609	0.126416294	0.082693859	0.092608485	0.003185153	0.006646686	35	35	35
ENSG00000180011.6	ZADH2	-1.52814874	-0.043346972	0.126475612	0.0702947	0.152048882	0.000121917	0.000478324	15	15	15
ENSG00000175768.8	TOMM5	1.527751624	0.021461411	0.126574217	0.311299639	0.0960244	0.002647358	0.005754615	66	75	75
ENSG00000170485.12	NPAS2	1.526191485	0.042877998	0.126962184	0.0565501	0.101334272	0.001985194	0.00460294	11	13	13
ENSG00000205143.2	ARID3C	-1.523261163	-0.030993748	0.127693379	0.152195673	0.2841235	4.50E-08	5.24E-07	9	9	9
ENSG00000164308.12	ERAP2	1.520435002	0.022149233	0.128401683	0.226489372	0.382134526	5.19E-11	1.44E-09	78	85	85
ENSG00000053372.4	MRTO4	-1.51827533	-0.052346777	0.128945004	0.044901423	0.068568384	0.011687173	0.018460119	12	13	13
ENSG00000160326.9	SLC2A6	-1.517492471	-0.018740819	0.129142393	0.325763904	0.161380898	7.22E-05	0.000306405	77	84	84
ENSG00000100109.12	TFIP11	-1.514286228	-0.011985181	0.12995326	0.788617752	0.26250494	1.78E-07	1.77E-06	131	143	143
ENSG00000197122.7	SRC	-1.514100546	-0.051118578	0.13000034	0.064005287	0.071200565	0.010134958	0.01648612	24	29	29
ENSG00000109917.6	ZNF259	-1.513719374	-0.052468394	0.130097029	0.04675619	0.083430765	0.005231946	0.009860998	18	21	21
ENSG00000120008.11	WDR11	1.510171777	0.022193755	0.130999598	0.267300655	0.265025493	1.52E-07	1.55E-06	59	65	65
ENSG00000101557.10	USP14	-1.508792845	-0.058480727	0.13135173	0.039942843	0.082544433	0.005488669	0.01023606	12	13	13
ENSG00000122687.13	FTSJ2	1.508161639	0.052418486	0.131513163	0.046642096	0.073171361	0.009109938	0.015204808	17	21	21
ENSG00000101187.11	SLCO4A1	1.502634252	0.023760729	0.132933386	0.216020028	0.096959532	0.002516588	0.005552992	59	83	83
ENSG00000138095.14	LRPPRC	1.502443652	0.026767098	0.13298257	0.179737609	0.19333169	1.16E-05	6.75E-05	38	44	44
ENSG00000257218.1	GATC	1.502304952	0.028394249	0.13301837	0.150949721	0.209247588	4.56E-06	3.06E-05	43	48	48
ENSG00000169826.6	CSGALNACT2	-1.502183859	-0.026584456	0.133049632	0.211366909	0.380332999	5.93E-11	1.59E-09	21	22	22
ENSG00000128059.4	PPAT	-1.500615799	-0.053234392	0.133454963	0.045783953	0.107080684	0.001452927	0.003581108	26	29	29
ENSG00000154122.8	ANKH	1.496426922	0.055085519	0.134542438	0.040090352	0.075388225	0.008080731	0.013828309	19	19	19
ENSG00000239704.6	CDRT4	-1.496412057	-0.034725223	0.134546309	0.139050776	0.050938347	0.030526717	0.037930921	47	63	63
ENSG00000139263.7	LRIG3	-1.495355856	-0.022669673	0.134821595	0.217032104	0.110591015	0.001200246	0.003060836	54	61	61
ENSG00000177462.6	OR2T8	-1.494209618	-0.044850015	0.13512084	0.06542212	0.058772936	0.019892201	0.02771588	29	34	34
ENSG00000240184.2	PCDHGC3	1.494121209	0.015554906	0.135143942	0.48278982	0.121299312	0.000668729	0.001940877	96	105	105
ENSG00000107951.8	MTPAP	-1.493857218	-0.042073495	0.135212943	0.070358088	0.119921566	0.000721135	0.002043039	27	31	31
ENSG00000186960.6	C14orf23	1.493705242	0.025842371	0.135252678	0.19326493	0.045408012	0.041405698	0.047987107	68	73	73
ENSG00000196535.10	MYO18A	1.493495469	0.042213793	0.135307539	0.093700469	0.048771379	0.034389179	0.041501687	23	29	29
ENSG00000188171.10	ZNF626	1.49330736	0.03737621	0.13535675	0.08195055	0.08455423	0.004923706	0.009413944	40	40	40
ENSG00000113396.8	SLC27A6	-1.492935965	-0.041379547	0.13545395	0.072345725	0.080544668	0.006115104	0.011104644	20	24	24
ENSG00000188888.7	GPR179	1.488379532	0.041020144	0.136650831	0.077799214	0.173006573	3.73E-05	0.000178853	10	11	11
ENSG00000071626.12	DAZAP1	-1.483280182	-0.79397312	0.137999986	0.000154169	0.046125435	0.039794468	0.046533271	1	1	1
ENSG00000111653.15	ING4	-1.481049132	-0.085536555	0.138593481	0.016617855	0.064521717	0.01455383	0.021934955	11	28	28
ENSG00000184492.5	FOXD4L1	-1.480930988	-0.141291519	0.138624964	0.006206624	0.057703857	0.02108536	0.028893269	4	15	15
ENSG00000157483.4	MYO1E	-1.479771132	-0.038203414	0.138934335	0.151631346	0.048737198	0.034453966	0.041549376	52	55	55
ENSG00000164251.4	F2RL1	1.478668069	0.056854331	0.13922905	0.033915388	0.074539957	0.00846	0.014365776	7	8	8
ENSG00000139780.7	METTL21C	1.473227251	0.022009979	0.140689769	0.304819341	0.307485515	9.75E-09	1.31E-07	33	35	35
ENSG00000171695.6	C20orf201	1.472954593	0.035394503	0.14076328	0.104476551	0.055064263	0.024352574	0.032186729	31	43	43
ENSG00000158050.4	DUSP2	1.47281151	0.040726859	0.140801868	0.074132617	0.115933109	0.000896867	0.002420713	9	21	21
ENSG00000143036.12	SLC44A3	1.467575818	0.02863726	0.142219481	0.167454646	0.203054486	6.56E-06	4.19E-05	37	40	40
ENSG00000172554.7	SNTG2	1.465437612	0.037749962	0.142801562	0.083625926	0.084529581	0.00493027	0.009419547	29	36	36
ENSG00000177084.12	POLE	1.46436169	0.023138678	0.14309515	0.244349047	0.394329548	2.09E-11	6.35E-10	44	47	47
ENSG00000140600.12	SH3GL3	-1.463977814	-0.295630359	0.14320001	0.001343148	0.055772061	0.023428984	0.031317395	1	1	1
ENSG00000166526.12	ZNF3	1.461340178	0.039824274	0.143922109	0.08311306	0.065493209	0.013806705	0.02103463	19	27	27
ENSG00000070371.11	CLTCL1	-1.458758279	-0.027084151	0.144631649	0.165129475	0.333991329	1.62E-09	2.82E-08	60	65	65
ENSG00000123453.12	SARDH	-1.456788056	-0.03289069	0.145174894	0.119387001	0.103286677	0.001785583	0.004228715	34	37	37
ENSG00000204962.4	PCDHA8	-1.456630862	-0.041080159	0.145218304	0.085907219	0.05392848	0.025912818	0.03354474	35	41	41
ENSG00000127364.2	TAS2R4	-1.455375411	-0.041801306	0.14556536	0.072296729	0.163369778	6.45E-05	0.000281378	19	22	22
ENSG00000100033.12	PRODH	1.453984355	0.096334373	0.145950644	0.019413935	0.138266815	0.000262648	0.000904006	10	12	12
ENSG00000109771.11	LRP2BP	1.453763501	0.041692416	0.146011886	0.066680218	0.091178727	0.003441347	0.007080159	23	26	26
ENSG00000130347.8	RTN4IP1	1.452781558	0.068056866	0.146284414	0.027833514	0.058735706	0.019932576	0.02775096	11	11	11
ENSG00000243955.1	GSTA1	1.452757523	0.043567803	0.146291089	0.056987901	0.136529624	0.000289163	0.000981395	29	32	32
ENSG00000197694.9	SPTAN1	1.451707183	0.034554243	0.146583041	0.189545271	0.045218695	0.041841994	0.04835464	43	47	47
ENSG00000163812.9	ZDHHC3	1.45154434	0.017769838	0.146628345	0.372805375	0.127606661	0.00047304	0.001476472	104	114	114
ENSG00000255874.1	LINC00346	-1.450653805	-0.025271661	0.146876285	0.233910247	0.1177113	0.00081382	0.002246371	51	63	63
ENSG00000157036.8	EXOG	-1.450128444	-0.048257345	0.147022705	0.058048941	0.047637247	0.036607112	0.043516817	26	28	28
ENSG00000188878.12	FBF1	-1.449464152	-0.060621739	0.147208004	0.03298697	0.182424443	2.18E-05	0.000114523	11	13	13
ENSG00000135407.6	AVIL	1.448693935	0.052466237	0.147423075	0.045837739	0.058034121	0.020709205	0.028527687	11	15	15
ENSG00000183309.7	ZNF623	-1.445924696	-0.0426603	0.148198324	0.083105953	0.105668951	0.001568831	0.00381688	16	18	18
ENSG00000132182.7	NUP210	-1.445837176	-0.015862873	0.148222876	0.497615467	0.123383671	0.000596525	0.001778301	76	92	92
ENSG00000188404.4	SELL	-1.445144363	-0.06529672	0.14841734	0.029424277	0.095900902	0.002665126	0.005765781	14	19	19
ENSG00000113460.8	BRIX1	-1.444157782	-0.030889002	0.148694598	0.12761257	0.093940516	0.002963595	0.006259458	41	45	45
ENSG00000093072.11	CECR1	-1.443609158	-0.054747407	0.148848947	0.047150593	0.151051574	0.000128915	0.000498706	25	40	40
ENSG00000034239.6	EFCAB1	1.442058441	0.023392414	0.149285888	0.244135804	0.388097097	3.33E-11	9.58E-10	21	21	21
ENSG00000175727.9	MLXIP	-1.441299796	-0.840012457	0.149500005	0.000139516	0.099789456	0.002158713	0.004914773	1	1	1
ENSG00000177663.9	IL17RA	1.441062049	0.048730883	0.149567154	0.041757279	0.091424892	0.003395819	0.006990428	8	8	8
ENSG00000060971.13	ACAA1	1.436979154	0.039156584	0.150723917	0.08964868	0.11700004	0.000846083	0.002321388	27	33	33
ENSG00000101746.11	NOL4	-1.436006107	-0.924077689	0.151000603	0.000162574	0.124472367	0.000561934	0.001701574	4	4	4
ENSG00000132613.10	MTSS1L	1.43173841	0.058484082	0.152218699	0.03622958	0.119096218	0.000754454	0.002112848	5	5	5
ENSG00000243477.1	NAT6	-1.429873106	-0.053745564	0.152753442	0.036755549	0.095216675	0.002765738	0.005927264	5	5	5
ENSG00000078674.13	PCM1	-1.427049558	-0.034448339	0.153565611	0.101558649	0.23980156	7.27E-07	6.08E-06	12	13	13
ENSG00000147679.7	UTP23	1.426133324	0.022547362	0.153829861	0.287111934	0.156773859	9.35E-05	0.000384208	68	76	76
ENSG00000254852.4	NPIPA2	-1.423981668	-0.031265026	0.154451779	0.154053395	0.142690852	0.000205477	0.000732783	25	34	34
ENSG00000179630.6	LACC1	1.423333524	0.060432875	0.154639493	0.030620346	0.076998888	0.007406865	0.012892638	8	8	8
ENSG00000157741.10	UBN2	-1.423239505	-0.056433473	0.154666737	0.036595855	0.047592941	0.036696681	0.043594911	9	9	9
ENSG00000121904.13	CSMD2	1.422526243	0.035237721	0.154873539	0.080901543	0.122836045	0.000614712	0.001822107	24	27	27
ENSG00000166529.10	ZSCAN21	-1.421805796	-0.039228786	0.155082636	0.080196742	0.198264168	8.69E-06	5.32E-05	19	20	20
ENSG00000167281.14	RBFOX3	1.421524562	0.023542941	0.155164318	0.220977557	0.064313791	0.014718965	0.022119936	49	54	54
ENSG00000154310.12	TNIK	-1.42035426	-0.021567993	0.155504572	0.275795937	0.158600607	8.44E-05	0.000350236	52	60	60
ENSG00000134809.4	TIMM10	1.420336342	0.040628061	0.155509786	0.072095248	0.119868381	0.000723238	0.002047407	11	11	11
ENSG00000122176.10	FMOD	-1.420140409	-0.032405906	0.155566808	0.139645873	0.128224106	0.000457244	0.001444025	47	48	48
ENSG00000159267.10	HLCS	1.419696883	0.065068239	0.155695946	0.036074222	0.087610802	0.004173805	0.008261304	8	10	10
ENSG00000163162.4	RNF149	1.419529532	0.013357688	0.155744693	0.646631748	0.265407524	1.48E-07	1.52E-06	133	152	152
ENSG00000138172.6	CALHM2	1.416525933	0.030247177	0.156621577	0.107960605	0.108289589	0.001360454	0.003391245	39	40	40
ENSG00000174231.12	PRPF8	-1.416110841	-0.03623366	0.156743055	0.099724211	0.068966684	0.011437766	0.018152542	28	34	34
ENSG00000223953.3	C1QTNF5	-1.41467078	-0.035597803	0.157165046	0.095541087	0.055409147	0.023898002	0.031756264	27	28	28
ENSG00000172456.12	FGGY	-1.414283977	-0.026860031	0.15727854	0.124465296	0.105030463	0.001624221	0.003917708	61	65	65
ENSG00000133661.11	SFTPD	1.414156162	0.032345039	0.157316056	0.092015218	0.178236406	2.77E-05	0.000139996	16	19	19
ENSG00000158008.5	EXTL1	1.414063893	0.046196491	0.157343143	0.063379691	0.062822419	0.01596024	0.023435623	23	33	33
ENSG00000110768.7	GTF2H1	1.412470541	0.020017276	0.157811459	0.309118348	0.238697601	7.78E-07	6.41E-06	84	101	101
ENSG00000103855.13	CD276	-1.412091085	-0.020626978	0.157923143	0.250274082	0.166563183	5.38E-05	0.000243884	69	75	75
ENSG00000169515.5	CCDC8	-1.411166153	-0.038589183	0.158195628	0.089114875	0.156802475	9.34E-05	0.000384022	17	20	20
ENSG00000072042.8	RDH11	1.410134435	0.491295093	0.158499991	0.000529298	0.07927209	0.006550482	0.011697494	1	1	1
ENSG00000094975.9	SUCO	1.406984728	0.015468393	0.159431917	0.434942057	0.167887122	4.99E-05	0.000229068	89	108	108
ENSG00000126561.12	STAT5A	-1.405295998	-0.038942703	0.159933278	0.059161598	0.166093994	5.53E-05	0.000248911	9	11	11
ENSG00000079432.3	CIC	1.404787699	0.045416962	0.160084418	0.052829676	0.077340579	0.007271314	0.01270514	18	26	26
ENSG00000168002.7	POLR2G	-1.404624894	-0.019795947	0.16013285	0.286181479	0.086333488	0.004472216	0.008736718	67	80	80
ENSG00000114738.6	MAPKAPK3	1.403199301	0.034389967	0.160557416	0.087539565	0.195655824	1.01E-05	6.03E-05	15	21	21
ENSG00000140104.9	C14orf79	-1.403033592	-0.035068138	0.160606822	0.104583212	0.092217667	0.003253234	0.006754019	13	18	18
ENSG00000090054.9	SPTLC1	-1.402116205	-0.053462972	0.160880549	0.052922761	0.091035836	0.003468053	0.007117763	8	9	9
ENSG00000163453.7	IGFBP7	-1.40142867	-0.031203212	0.161085924	0.128509353	0.107869269	0.001391924	0.0034626	43	44	44
ENSG00000150995.13	ITPR1	1.400921446	0.014794687	0.161237565	0.472131827	0.112435564	0.001085465	0.002811314	97	116	116
ENSG00000135773.8	CAPN9	-1.40086991	-0.034780884	0.161252978	0.094369502	0.105046343	0.00162282	0.003917708	17	17	17
ENSG00000109270.8	LAMTOR3	-1.400115247	-0.043366781	0.16147881	0.044380471	0.107560442	0.001415505	0.003511694	8	10	10
ENSG00000196275.9	GTF2IRD2	-1.398934374	-0.127253516	0.161832663	0.009770662	0.062691161	0.016074429	0.023555938	5	10	10
ENSG00000159228.8	CBR1	-1.3971366	-0.032196294	0.162372498	0.103487224	0.053260661	0.026877419	0.034432739	47	52	52
ENSG00000204438.6	GPANK1	1.3952778	0.084477625	0.162932084	0.021029639	0.047330701	0.037231469	0.044058237	32	52	52
ENSG00000168803.10	ADAL	1.393765243	0.041075918	0.163388507	0.066185973	0.096387936	0.002595736	0.005672794	15	18	18
ENSG00000173226.12	IQCB1	-1.392763895	-0.022484085	0.1636912	0.220707109	0.354623395	3.82E-10	8.35E-09	59	70	70
ENSG00000171763.13	SPATA5L1	-1.392653049	-0.045797578	0.163724733	0.041410238	0.090412545	0.003586981	0.007317941	8	11	11
ENSG00000196236.8	XPNPEP3	1.391802308	0.035694082	0.163982271	0.09473604	0.081969373	0.00566193	0.01045853	19	26	26
ENSG00000244165.1	P2RY11	1.391451458	0.162953707	0.16408857	0.004010689	0.087903771	0.00410821	0.008158002	2	2	2
ENSG00000090432.5	MUL1	1.390163044	0.047757474	0.164479373	0.057454646	0.199362377	8.15E-06	5.04E-05	14	16	16
ENSG00000167383.4	ZNF229	-1.389777027	-0.049945556	0.164596596	0.044577097	0.057955472	0.02079816	0.028607062	16	19	19
ENSG00000146143.13	PRIM2	-1.389449098	-0.253586102	0.164696229	0.002370028	0.047289463	0.037316293	0.044115728	2	3	3
ENSG00000149548.10	CCDC15	-1.385680667	-0.015448084	0.165844434	0.398980375	0.098793774	0.002278455	0.005129825	117	132	132
ENSG00000166130.10	IKBIP	-1.385226176	-0.055464351	0.165983319	0.04179562	0.047658905	0.036563409	0.043479019	20	23	23
ENSG00000183230.12	CTNNA3	-1.382900353	-0.055603084	0.166695422	0.029767495	0.061053975	0.017570131	0.025181897	13	13	13
ENSG00000175115.7	PACS1	-1.381597158	-0.037393294	0.167095427	0.091494043	0.163459558	6.42E-05	0.000280289	23	28	28
ENSG00000244687.7	UBE2V1	1.381043992	0.049714567	0.167265435	0.045147349	0.095011655	0.002796614	0.005980266	7	7	7
ENSG00000143653.9	SCCPDH	1.380569846	0.05728985	0.16741126	0.030195727	0.070575328	0.010483777	0.016881732	7	7	7
ENSG00000171714.10	ANO5	-1.380346588	-0.035165582	0.167479957	0.086448345	0.07027642	0.010654778	0.017095626	34	39	39
ENSG00000122783.12	C7orf49	-1.379956603	-0.534044621	0.167600007	0.000589037	0.05637123	0.022675037	0.030544383	1	1	1
ENSG00000160271.10	RALGDS	1.379646914	0.018079258	0.167695385	0.371336724	0.084433625	0.004955907	0.009455709	72	80	80
ENSG00000086506.2	HBQ1	1.378765512	0.043966029	0.167967063	0.068581104	0.051073117	0.030301706	0.0377541	27	34	34
ENSG00000245680.5	ZNF585B	-1.378020693	-0.024935778	0.168196899	0.167608414	0.158725375	8.38E-05	0.000348181	26	30	30
ENSG00000197124.7	ZNF682	1.376973782	0.025223598	0.168520354	0.194428679	0.210625614	4.20E-06	2.87E-05	56	80	80
ENSG00000114993.11	RTKN	1.376392961	0.439913411	0.168700006	0.000512365	0.115137563	0.000936688	0.002504131	1	1	1
ENSG00000158234.8	FAIM	1.37608421	0.069325313	0.168795564	0.020185793	0.211340605	4.03E-06	2.77E-05	13	18	18
ENSG00000197381.11	ADARB1	1.375577605	0.015793633	0.168952444	0.422120865	0.120341942	0.000704728	0.00201094	86	101	101
ENSG00000037757.9	MRI1	1.373039785	0.018372588	0.169739979	0.358688172	0.341537238	9.60E-10	1.81E-08	45	51	51
ENSG00000095637.16	SORBS1	1.370633526	0.070535716	0.170489226	0.023120467	0.053557699	0.026443932	0.034039217	4	5	5
ENSG00000107281.5	NPDC1	1.367399931	0.13148167	0.171499984	0.010487844	0.066700885	0.012931637	0.01995959	1	1	1
ENSG00000213937.3	CLDN9	1.36601797	0.049542661	0.171933323	0.040509362	0.117890033	0.000805906	0.002227894	4	5	5
ENSG00000248727.1	CTC-236F12.4	1.365929368	0.036881896	0.171961134	0.100467684	0.055486362	0.023797418	0.031647701	45	51	51
ENSG00000165023.5	DIRAS2	-1.365374284	-0.019605261	0.172135442	0.22546017	0.098603663	0.002302058	0.005176582	82	88	88
ENSG00000116544.7	DLGAP3	1.358105646	0.325139933	0.174430164	0.001196328	0.083014456	0.005350999	0.010041645	2	2	2
ENSG00000164122.4	ASB5	-1.355954376	-0.023064092	0.175113685	0.22380242	0.062559803	0.016189532	0.023696086	54	59	59
ENSG00000111667.9	USP5	1.355248684	0.732753087	0.175338339	0.000161551	0.062088298	0.016609598	0.024146398	3	3	3
ENSG00000128928.4	IVD	1.353469546	0.034391461	0.175905673	0.089677359	0.12378801	0.000583439	0.001750723	27	30	30
ENSG00000197705.5	KLHL14	1.352328703	0.029883054	0.176270186	0.151022537	0.071691657	0.009869176	0.016161769	57	68	68
ENSG00000174705.7	SH3PXD2B	1.352270674	0.027223118	0.176288742	0.154460864	0.175935113	3.16E-05	0.000155607	41	43	43
ENSG00000144504.11	ANKMY1	-1.35132208	-0.024194857	0.176592282	0.199430986	0.100155869	0.00211624	0.004845261	59	63	63
ENSG00000103496.10	STX4	1.35008882	0.050551669	0.176987494	0.041928066	0.116817847	0.000854549	0.002340257	15	16	16
ENSG00000107371.8	EXOSC3	1.347960365	0.02439626	0.177671131	0.240827315	0.050488112	0.03129091	0.038617672	69	78	78
ENSG00000174744.9	BRMS1	1.347328453	0.045840398	0.177874472	0.061974879	0.093921094	0.002966713	0.006260461	11	16	16
ENSG00000214309.3	MBLAC1	1.346953227	0.043419834	0.177995297	0.096316659	0.241814762	6.43E-07	5.48E-06	40	45	45
ENSG00000029559.5	IBSP	-1.346142316	-0.047928654	0.178256624	0.04626356	0.074137487	0.008646146	0.014611024	12	13	13
ENSG00000176927.10	EFCAB5	-1.34513738	-0.042027609	0.178580874	0.059434615	0.064447227	0.014612774	0.022005628	13	16	16
ENSG00000140464.15	PML	-1.342698711	-0.015194265	0.179369552	0.30141049	0.102989484	0.001814629	0.004280846	67	86	86
ENSG00000243284.1	VSIG8	1.339973961	0.038906438	0.180253811	0.066267188	0.089423618	0.003784068	0.0076419	10	11	11
ENSG00000160282.9	FTCD	1.339479356	0.022381291	0.180414671	0.208448376	0.287036187	3.73E-08	4.41E-07	31	39	39
ENSG00000141668.5	CBLN2	1.337664653	0.070643514	0.181005779	0.027339984	0.092857474	0.003142521	0.006572746	5	5	5
ENSG00000050393.7	MCUR1	1.336411658	0.057157966	0.181414758	0.029854878	0.065795965	0.013581874	0.020778785	8	10	10
ENSG00000115750.12	TAF1B	1.334443878	0.016426331	0.182058428	0.411731049	0.084352861	0.004977588	0.009480532	87	101	101
ENSG00000184497.8	TMEM255B	-1.332928454	-0.041578997	0.182555284	0.055754898	0.196379415	9.70E-06	5.82E-05	27	43	43
ENSG00000204033.5	LRIT2	-1.332329327	-0.020925169	0.182751994	0.196364702	0.200084595	7.81E-06	4.84E-05	29	34	34
ENSG00000100294.8	MCAT	1.331675037	0.024581518	0.182966996	0.195247694	0.161911759	7.00E-05	0.00029945	36	39	39
ENSG00000168066.16	SF1	1.331089075	0.017489291	0.183159703	0.484008277	0.124129255	0.000572616	0.001724543	82	114	114
ENSG00000179841.8	AKAP5	1.330566096	0.049392983	0.183331825	0.046144037	0.044477719	0.043595779	0.049751631	52	58	58
ENSG00000136827.11	TOR1A	-1.328435403	-0.02382522	0.18403431	0.174744959	0.077398087	0.007248746	0.012671771	56	58	58
ENSG00000204572.5	KRTAP5-10	-1.328391008	-0.055814621	0.184048969	0.027775202	0.084523859	0.004931795	0.009419547	8	12	12
ENSG00000173064.6	HECTD4	1.324848823	0.025432298	0.185221298	0.11692087	0.07575276	0.007923027	0.013596664	37	48	48
ENSG00000197296.5	FITM2	1.324428075	0.018639238	0.185360916	0.304017757	0.049335506	0.033337809	0.040487084	70	77	77
ENSG00000203666.8	EFCAB2	1.322597756	0.019996018	0.185969181	0.268888665	0.417969453	3.38E-12	1.22E-10	33	33	33
ENSG00000141452.5	C18orf8	1.321871735	0.036759859	0.186210866	0.084315326	0.193355075	1.16E-05	6.75E-05	14	16	16
ENSG00000198933.5	TBKBP1	1.321697639	0.020401486	0.186268855	0.209839907	0.094281254	0.002909428	0.006184397	30	32	32
ENSG00000091536.12	MYO15A	1.319669419	0.061292405	0.186945415	0.029624272	0.062008237	0.016682012	0.024222742	10	15	15
ENSG00000106278.7	PTPRZ1	-1.319640168	-0.038206761	0.186955185	0.064385432	0.047794933	0.036290147	0.043266782	22	25	25
ENSG00000123427.11	METTL21B	-1.319204251	-0.025251018	0.187100837	0.146206145	0.278025526	6.66E-08	7.39E-07	18	20	20
ENSG00000176209.7	SMIM19	1.317388124	0.01650341	0.18770856	0.329198912	0.330020787	2.13E-09	3.57E-08	27	35	35
ENSG00000163069.8	SGCB	1.315767183	0.019884885	0.188252197	0.123561468	0.103633492	0.00175227	0.004163323	27	31	31
ENSG00000100987.10	VSX1	-1.313500244	-0.023597747	0.189014439	0.201024506	0.233859818	1.04E-06	8.36E-06	50	52	52
ENSG00000157322.12	CLEC18A	1.313359104	0.025786369	0.189061971	0.096981122	0.063273677	0.015573885	0.023035027	36	50	50
ENSG00000144583.4	Mar-04	1.312697372	0.034872213	0.189284943	0.074755463	0.07589876	0.007860733	0.013521533	23	27	27
ENSG00000157927.12	RADIL	-1.310625148	-0.0523601	0.189984439	0.043183589	0.142993715	0.000202047	0.000723376	14	16	16
ENSG00000174292.8	TNK1	1.309151517	0.02834602	0.190483031	0.118574321	0.073202709	0.009094504	0.015185989	29	32	32
ENSG00000072415.4	MPP5	-1.309071547	-0.039902673	0.190510116	0.058960954	0.048003703	0.035874833	0.042846191	14	16	16
ENSG00000128815.13	WDFY4	-1.304945374	-0.032853608	0.191911449	0.098138997	0.123065183	0.000607036	0.00180307	28	32	32
ENSG00000206549.8	PRSS50	-1.304391861	-0.363377705	0.192100009	0.000606498	0.051717531	0.029249006	0.036718105	1	1	1
ENSG00000188672.12	RHCE	1.304066974	0.04488181	0.192210748	0.056991769	0.349717776	5.41E-10	1.12E-08	8	13	13
ENSG00000189171.9	S100A13	-1.303914589	-0.025007315	0.192262706	0.184869792	0.291390852	2.81E-08	3.40E-07	42	46	46
ENSG00000132600.12	PRMT7	1.303439063	0.017736448	0.192424908	0.281573624	0.394639394	2.04E-11	6.25E-10	19	22	22
ENSG00000072858.6	SIDT1	1.30253706	0.022167637	0.192732858	0.204380806	0.350063501	5.28E-10	1.09E-08	14	15	15
ENSG00000204618.4	RNF39	1.302191414	0.022714507	0.19285096	0.245206655	0.112256263	0.001096127	0.002834909	134	154	154
ENSG00000143933.12	CALM2	-1.300294638	-0.725532947	0.193500005	0.000154205	0.044918254	0.042544148	0.048832485	1	1	1
ENSG00000108272.9	DHRS11	1.299735527	0.025270415	0.193691629	0.146613023	0.207102293	5.17E-06	3.40E-05	25	27	27
ENSG00000184227.3	ACOT1	-1.29585774	-0.025122944	0.195024501	0.139632677	0.332225768	1.83E-09	3.14E-08	23	26	26
ENSG00000198590.7	C3orf35	-1.294589808	-0.069306375	0.19546177	0.033091187	0.11277269	0.001065694	0.002767707	3	3	3
ENSG00000172725.9	CORO1B	-1.294498793	-0.014302857	0.195493186	0.407156849	0.162286991	6.86E-05	0.000295248	56	73	73
ENSG00000071539.9	TRIP13	-1.293768888	-0.021156691	0.195745262	0.225797199	0.084829188	0.004851072	0.009311173	40	63	63
ENSG00000068903.15	SIRT2	1.293355084	0.026108834	0.195888277	0.120212281	0.114846874	0.000951671	0.002536758	57	64	64
ENSG00000166896.3	XRCC6BP1	1.292544759	0.01984983	0.196168556	0.204317666	0.402090179	1.16E-11	3.81E-10	19	19	19
ENSG00000134201.6	GSTM5	1.290397669	0.021250967	0.196912621	0.17923345	0.325875743	2.83E-09	4.45E-08	21	22	22
ENSG00000148057.11	IDNK	1.290122816	0.035208826	0.197008019	0.069594939	0.053020569	0.027233094	0.034794785	37	43	43
ENSG00000050628.16	PTGER3	1.289980229	0.024001824	0.197057523	0.18668884	0.202805422	6.66E-06	4.23E-05	61	66	66
ENSG00000169884.9	WNT10B	1.288696936	0.025168669	0.197503468	0.155775817	0.328684825	2.33E-09	3.80E-08	12	16	16
ENSG00000109686.12	SH3D19	1.287541597	0.023975341	0.197905581	0.120187136	0.143678753	0.000194495	0.000700459	18	22	22
ENSG00000089351.10	GRAMD1A	1.285825831	0.037965752	0.198503853	0.098653077	0.045778385	0.040565663	0.047238423	48	55	55
ENSG00000185988.7	PLK5	-1.284822275	-0.027794347	0.198854397	0.151775902	0.201606711	7.15E-06	4.48E-05	43	54	54
ENSG00000170122.4	FOXD4	-1.283993468	-0.065071129	0.199144241	0.022830139	0.062680438	0.016083794	0.023560206	6	9	9
ENSG00000163431.11	LMOD1	1.283365232	0.027752729	0.199364149	0.109521761	0.058369155	0.020334575	0.028181711	26	29	29
ENSG00000147996.12	CBWD5	1.282789803	0.024473694	0.199565727	0.174823708	0.109942164	0.001243418	0.003155509	50	88	88
ENSG00000165935.5	SMCO2	-1.281957735	-0.05481907	0.199857473	0.027076024	0.06326139	0.015584278	0.023041068	7	7	7
ENSG00000106018.9	VIPR2	1.28161598	0.059648113	0.199977392	0.02337382	0.069723286	0.010978652	0.017568968	8	12	12
ENSG00000110871.10	COQ5	1.280865642	0.056784075	0.200240863	0.027645742	0.048441629	0.035019435	0.042081508	11	13	13
ENSG00000184206.7	GOLGA6L4	-1.280841541	-0.020981373	0.20024933	0.149547225	0.299934008	1.61E-08	2.07E-07	34	41	41
ENSG00000205581.6	HMGN1	-1.280749658	-0.021098451	0.200281612	0.205832217	0.050115956	0.03193735	0.039229867	58	60	60
ENSG00000131504.11	DIAPH1	-1.279931349	-0.040395787	0.200569281	0.060494878	0.181585817	2.28E-05	0.00011932	18	20	20
ENSG00000157150.4	TIMP4	1.278479193	0.01947462	0.201080517	0.233032711	0.115621711	0.000912251	0.002456368	47	55	55
ENSG00000118096.3	IFT46	1.278086278	0.028145397	0.201219007	0.091444821	0.077936084	0.007040986	0.012402595	40	42	42
ENSG00000057019.11	DCBLD2	1.277795964	0.028593998	0.201321378	0.127731208	0.185254862	1.85E-05	0.000100036	44	48	48
ENSG00000144895.7	EIF2A	-1.277083857	-0.021455856	0.201572643	0.200115136	0.442111496	4.89E-13	2.05E-11	8	8	8
ENSG00000180992.5	MRPL14	1.275173371	0.033957644	0.202247884	0.068986226	0.063674503	0.015238639	0.022704699	22	24	24
ENSG00000134007.3	ADAM20	1.274435032	0.060054784	0.202509284	0.023213345	0.059508491	0.019111268	0.026853203	3	4	4
ENSG00000013573.12	DDX11	1.274392992	0.022058484	0.202524175	0.182313655	0.670556241	2.03E-23	3.71E-20	26	39	39
ENSG00000172922.4	RNASEH2C	-1.273263563	-0.08986781	0.202924532	0.013294163	0.054868691	0.024614249	0.032375643	6	9	9
ENSG00000116977.14	LGALS8	1.271936088	0.036716532	0.203395828	0.081371902	0.181867819	2.25E-05	0.000117739	20	24	24
ENSG00000111642.10	CHD4	-1.268368125	-0.036638896	0.204666519	0.08225994	0.045006276	0.042337182	0.048694781	27	54	54
ENSG00000228570.3	NUTM2E	1.267720147	0.070606677	0.204897907	0.016496474	0.076631529	0.007555424	0.013082632	10	20	20
ENSG00000182362.9	YBEY	1.266515978	0.019681285	0.205328413	0.238109303	0.31972201	4.29E-09	6.42E-08	39	51	51
ENSG00000182957.11	SPATA13	1.266235474	0.042219079	0.205428791	0.058850547	0.137979181	0.000266866	0.000915935	25	34	34
ENSG00000187848.8	P2RX2	1.265672971	0.031811992	0.205630189	0.099785059	0.179120269	2.63E-05	0.000134197	38	44	44
ENSG00000150773.6	PIH1D2	-1.265420918	-0.020966885	0.20572048	0.215998456	0.091551589	0.003372621	0.006954435	88	95	95
ENSG00000127081.9	ZNF484	-1.265198946	-0.224383372	0.20580002	0.00189514	0.075645199	0.007969236	0.013650304	1	1	1
ENSG00000107554.11	DNMBP	-1.265119262	-0.03616721	0.205828579	0.074312827	0.044798434	0.042827559	0.049043524	24	25	25
ENSG00000122481.12	RWDD3	-1.264196236	-0.022619018	0.206159602	0.205964719	0.201048716	7.38E-06	4.61E-05	55	61	61
ENSG00000141569.6	TRIM65	-1.263562018	-0.027213585	0.206387274	0.12574365	0.224310691	1.86E-06	1.40E-05	35	47	47
ENSG00000187672.8	ERC2	1.263467056	0.054154171	0.206421379	0.034538766	0.136115449	0.000295865	0.000999496	37	47	47
ENSG00000122965.6	RBM19	-1.26211681	-0.034043292	0.206906757	0.057155753	0.131125838	0.000389716	0.001259454	10	10	10
ENSG00000143624.9	INTS3	1.261783175	0.02605036	0.207026818	0.156676885	0.058746096	0.019921301	0.027745839	32	40	40
ENSG00000151576.6	QTRTD1	1.261538474	0.033007498	0.207114907	0.094066506	0.082766415	0.005423215	0.010130314	35	36	36
ENSG00000182732.12	RGS6	-1.260879501	-0.649555569	0.207352265	0.000194881	0.047928062	0.036024741	0.042992461	3	3	3
ENSG00000173715.11	C11orf80	-1.260268527	-0.013621688	0.20757251	0.515161993	0.202041381	6.97E-06	4.39E-05	84	96	96
ENSG00000125503.8	PPP1R12C	-1.25939623	-0.018166767	0.20788725	0.259627534	0.058009374	0.020737153	0.028555415	62	85	85
ENSG00000160953.10	MUM1	-1.256953364	-0.05086669	0.208770523	0.026639088	0.044329532	0.043955533	0.049974778	5	6	6
ENSG00000169418.9	NPR1	1.256076622	0.021773753	0.209088191	0.106527033	0.16930221	4.61E-05	0.000214907	26	32	32
ENSG00000010165.15	METTL13	1.255492617	0.028184783	0.209299986	0.107414155	0.118974603	0.000759491	0.002121626	37	41	41
ENSG00000196781.9	TLE1	1.254106971	0.05818094	0.209803127	0.028471023	0.050036871	0.032076475	0.039318335	8	9	9
ENSG00000049860.9	HEXB	1.252577758	0.046251623	0.210359414	0.079021213	0.048433508	0.035035106	0.042086491	28	32	32
ENSG00000132481.2	TRIM47	-1.250283059	-0.023831344	0.211196165	0.158895867	0.065126452	0.014084101	0.021376314	78	95	95
ENSG00000180481.6	GLIPR1L2	1.249138816	0.026019536	0.211614306	0.149267704	0.432316813	1.08E-12	4.34E-11	8	11	11
ENSG00000135916.11	ITM2C	-1.248288983	-0.064448733	0.211925247	0.017695283	0.063898388	0.015054569	0.022485488	5	5	5
ENSG00000136247.10	ZDHHC4	-1.247943512	-0.028882676	0.212051744	0.146252871	0.048528317	0.034852607	0.041936235	49	68	68
ENSG00000172985.8	SH3RF3	1.246900634	0.015881016	0.212433934	0.372121663	0.164419556	6.08E-05	0.000269814	80	88	88
ENSG00000105668.3	UPK1A	1.246517793	0.032475077	0.212574361	0.090491694	0.179152227	2.63E-05	0.000134197	22	27	27
ENSG00000144840.4	RABL3	1.245683316	0.028764273	0.212880681	0.114543572	0.05165	0.029357545	0.03682904	63	69	69
ENSG00000118197.9	DDX59	-1.245402626	-0.02717149	0.212983788	0.12607569	0.258928019	2.23E-07	2.16E-06	39	41	41
ENSG00000054116.7	TRAPPC3	1.242015458	0.015682272	0.214230859	0.476973004	0.163300566	6.47E-05	0.000282144	123	135	135
ENSG00000126934.9	MAP2K2	1.241574781	0.023514086	0.214393491	0.14452645	0.118996121	0.000758598	0.002121626	29	37	37
ENSG00000104231.6	ZFAND1	-1.241230609	-0.036158146	0.21452057	0.067039669	0.109630583	0.001264694	0.003198387	20	22	22
ENSG00000106636.3	YKT6	-1.2405517	-0.898031379	0.214771404	0.000121452	0.048748083	0.03443332	0.04154123	2	2	2
ENSG00000158747.9	NBL1	-1.240536856	-0.04697492	0.214776891	0.048175807	0.112050937	0.001108465	0.002862762	28	32	32
ENSG00000182327.7	GLTPD2	1.239869003	0.027984015	0.215023851	0.098270105	0.0600802	0.018525813	0.026232446	28	32	32
ENSG00000154079.5	C6orf57	-1.238896781	-0.031246852	0.215383726	0.095267624	0.10874422	0.00132721	0.003328825	25	25	25
ENSG00000147894.10	C9orf72	-1.237429578	-0.029503686	0.215927644	0.101067977	0.225615533	1.72E-06	1.32E-05	15	19	19
ENSG00000184774.6	RP11-480I12.4	-1.23728672	-0.036360793	0.215980656	0.072648403	0.062389539	0.016339967	0.023850913	26	28	28
ENSG00000064195.7	DLX3	-1.237090324	-0.020172904	0.216053551	0.259119442	0.055057566	0.024361488	0.032186862	56	64	64
ENSG00000138381.5	ASNSD1	-1.235749606	-0.017445818	0.216551652	0.272327524	0.241487316	6.56E-07	5.58E-06	56	63	63
ENSG00000069275.12	NUCKS1	1.235694232	0.014947945	0.216572242	0.409586778	0.170701116	4.26E-05	0.000200785	91	101	101
ENSG00000087365.10	SF3B2	-1.23566877	-0.014594972	0.216581711	0.448267943	0.302208561	1.38E-08	1.80E-07	62	84	84
ENSG00000073756.7	PTGS2	1.235576527	0.032226486	0.216616014	0.090249679	0.078150314	0.006959927	0.012284487	24	28	28
ENSG00000075239.9	ACAT1	1.235279304	0.036874335	0.216726573	0.099858394	0.069104618	0.011352649	0.018048831	37	40	40
ENSG00000241106.2	HLA-DOB	1.23391833	0.01963822	0.217233339	0.28740669	0.569821519	3.60E-18	6.58E-16	56	73	73
ENSG00000178343.4	SHISA3	-1.233762532	-0.020570236	0.217291405	0.17697461	0.090328922	0.003603243	0.007334727	50	57	57
ENSG00000008283.11	CYB561	1.23312107	0.016802002	0.217530598	0.338688869	0.483876532	1.41E-14	8.90E-13	46	48	48
ENSG00000124380.6	SNRNP27	-1.232630088	-0.013467521	0.217713806	0.440388785	0.227917013	1.50E-06	1.15E-05	78	89	89
ENSG00000094963.9	FMO2	-1.232293757	-0.025912671	0.217839371	0.118631964	0.109401702	0.001280551	0.003231777	31	37	37
ENSG00000174628.12	IQCK	1.232162554	0.028297452	0.217888368	0.116212992	0.136203298	0.000294431	0.000995572	27	29	29
ENSG00000198648.6	STK39	1.231574296	0.040784435	0.218108148	0.049915389	0.09244033	0.00321427	0.006695967	14	16	16
ENSG00000126001.11	CEP250	-1.231506374	-0.037077768	0.218133534	0.077142192	0.139562817	0.000244443	0.000847741	8	9	9
ENSG00000173041.7	ZNF680	-1.230132872	-0.032601137	0.218647352	0.079485511	0.153122079	0.000114804	0.000454223	12	19	19
ENSG00000124019.9	FAM124B	-1.229099195	-0.047920919	0.219034617	0.037965885	0.098037707	0.00237377	0.005318191	15	15	15
ENSG00000171759.4	PAH	1.228746298	0.055018605	0.219166942	0.027538198	0.047330736	0.037231399	0.044058237	3	3	3
ENSG00000022556.11	NLRP2	-1.227567161	-0.021683885	0.219609496	0.200902043	0.326173806	2.77E-09	4.38E-08	21	26	26
ENSG00000156097.8	GPR61	1.227028859	0.014443225	0.219811744	0.436678828	0.083407916	0.005238411	0.009865852	110	118	118
ENSG00000125812.11	GZF1	-1.22631444	-0.025441349	0.220080369	0.112119778	0.082773786	0.005421055	0.010130314	31	35	35
ENSG00000143257.7	NR1I3	1.225918833	0.053947986	0.220229221	0.038900614	0.056821398	0.022124851	0.029924675	12	13	13
ENSG00000175322.7	ZNF519	1.220959759	0.038364426	0.222101257	0.048863806	0.057281063	0.02157705	0.029379618	21	28	28
ENSG00000119844.10	AFTPH	1.220608741	0.057286773	0.222234195	0.037961392	0.052076679	0.028678612	0.036232909	8	9	9
ENSG00000124508.12	BTN2A2	-1.220281964	-0.034787207	0.222358004	0.069238902	0.067733476	0.012227891	0.019096994	13	13	13
ENSG00000248469.1	RP11-826N14.2	1.219287864	0.026278053	0.222734953	0.136919399	0.254675018	2.91E-07	2.70E-06	21	25	25
ENSG00000173209.18	AHSA2	-1.219023132	-0.014527486	0.222835413	0.37223203	0.463269761	8.40E-14	4.36E-12	26	27	27
ENSG00000124243.13	BCAS4	-1.217848082	-0.018785989	0.223281709	0.240756215	0.261592992	1.89E-07	1.86E-06	45	48	48
ENSG00000011478.7	QPCTL	-1.217215711	-0.019714889	0.223522154	0.198960104	0.139607464	0.000243839	0.000847254	38	40	40
ENSG00000109775.6	UFSP2	1.216687886	0.011725114	0.22372299	0.67703208	0.237444549	8.39E-07	6.86E-06	130	153	153
ENSG00000134245.13	WNT2B	-1.216499078	-0.021826845	0.223794862	0.163638914	0.244509074	5.45E-07	4.76E-06	44	47	47
ENSG00000168158.2	OR2C1	1.21574058	0.018659507	0.22408376	0.178175951	0.087455768	0.004208938	0.008318612	47	57	57
ENSG00000242220.2	TCP10L	-1.215183129	-0.017931218	0.224296254	0.311186368	0.090078918	0.0036523	0.007422175	73	85	85
ENSG00000103351.8	CLUAP1	-1.214900739	-0.057784239	0.224403952	0.024465242	0.050022237	0.032102286	0.039318335	5	5	5
ENSG00000204677.6	FAM153C	-1.213896533	-0.050994483	0.224787237	0.034373376	0.052617337	0.027841294	0.03541352	10	11	11
ENSG00000104980.3	TIMM44	1.212017299	0.052709293	0.225505759	0.028288384	0.094022546	0.002950464	0.006235329	3	6	6
ENSG00000130299.12	GTPBP3	1.210014926	0.026452004	0.226273166	0.11225019	0.066078217	0.013375597	0.020523389	38	41	41
ENSG00000170832.8	USP32	1.208971171	0.164392695	0.226673921	0.002963482	0.047673704	0.036533577	0.043457695	3	3	3
ENSG00000001084.6	GCLC	1.20700637	0.017334641	0.227429691	0.341944008	0.090347	0.003599721	0.007334727	85	96	96
ENSG00000006451.3	RALA	1.205787394	0.011645365	0.227899477	0.543636165	0.178357027	2.75E-05	0.000139225	109	119	119
ENSG00000139133.2	ALG10	-1.205555402	-0.244098277	0.227988964	0.001289981	0.048474086	0.034956878	0.042020163	2	2	2
ENSG00000182851.2	GPIHBP1	1.204414486	0.026621638	0.228429416	0.11022519	0.084346493	0.004979302	0.009480532	27	35	35
ENSG00000154556.13	SORBS2	-1.204169205	-0.031175419	0.228524186	0.086065629	0.073320416	0.009036786	0.01513396	20	27	27
ENSG00000096092.5	TMEM14A	1.203005555	0.042005724	0.228974171	0.061929879	0.063170483	0.015661395	0.023117646	15	15	15
ENSG00000145020.10	AMT	1.200837424	0.032578554	0.229814272	0.069660277	0.127211542	0.000483431	0.001502482	20	23	23
ENSG00000089063.10	TMEM230	-1.20083115	-0.063371689	0.229816706	0.015966877	0.105689463	0.001567083	0.003815168	15	16	16
ENSG00000067167.3	TRAM1	-1.19915769	-0.691216904	0.230466636	0.000215258	0.0644547	0.014606849	0.022005628	3	3	3
ENSG00000163833.6	FBXO40	-1.197934646	-0.039801789	0.230942461	0.054598867	0.054226692	0.025493553	0.033190237	22	24	24
ENSG00000135472.4	FAIM2	-1.196792066	-0.023293328	0.231387611	0.090285669	0.060100989	0.018504869	0.026223085	18	20	20
ENSG00000154040.16	CABYR	-1.196050697	-0.023952043	0.231676776	0.136633743	0.125032006	0.000544932	0.001663889	28	28	28
ENSG00000174928.11	C3orf33	-1.195735994	-0.055382356	0.231799601	0.029666975	0.067541559	0.012355705	0.019212178	3	4	4
ENSG00000272195.1	RP11-156E8.1	-1.194203386	-0.014229614	0.232398419	0.411891343	0.522866528	3.97E-16	3.82E-14	51	61	61
ENSG00000089101.13	C20orf26	1.193458879	0.021484728	0.232689707	0.184111058	0.131107499	0.00039011	0.001259613	63	65	65
ENSG00000244486.3	SCARF2	1.192064374	0.026764373	0.233236005	0.117461533	0.064884118	0.014270468	0.02158807	30	39	39
ENSG00000167526.9	RPL13	1.191401314	0.081897759	0.233496078	0.012844875	0.125735103	0.000524292	0.00161029	10	25	25
ENSG00000144366.11	GULP1	-1.191320845	-0.025846027	0.233527654	0.239594785	0.177897545	2.82E-05	0.000141953	78	95	95
ENSG00000144847.8	IGSF11	-1.188105363	-0.012589556	0.234791902	0.470557774	0.219784632	2.44E-06	1.77E-05	82	88	88
ENSG00000176731.7	C8orf59	-1.187423017	-0.033595795	0.235060805	0.075812247	0.189896394	1.41E-05	7.99E-05	27	30	30
ENSG00000176593.3	CTD-2368P22.1	1.187278364	0.034904509	0.235117839	0.073851641	0.191054578	1.32E-05	7.55E-05	10	10	10
ENSG00000170222.11	ADPRM	-1.186867534	-0.041995762	0.235279875	0.05046885	0.121446564	0.000663356	0.00193026	17	19	19
ENSG00000138363.10	ATIC	1.186783237	0.012136356	0.235313132	0.589133626	0.209910457	4.38E-06	2.98E-05	114	139	139
ENSG00000156299.8	TIAM1	1.186609467	0.020584162	0.2353817	0.181292248	0.152098904	0.000121576	0.000477908	58	67	67
ENSG00000128699.9	ORMDL1	1.185623698	0.023491478	0.235770939	0.15041082	0.208674537	4.71E-06	3.16E-05	13	17	17
ENSG00000138688.11	KIAA1109	-1.181721659	-0.010781865	0.237316161	0.48955953	0.121717041	0.000653598	0.001907946	83	93	93
ENSG00000184486.7	POU3F2	1.181471276	0.020912793	0.237415558	0.180764668	0.045668579	0.040812862	0.047435527	42	58	58
ENSG00000105426.10	PTPRS	1.181193465	0.026731066	0.237525877	0.096381733	0.044838182	0.042733327	0.048974841	32	37	37
ENSG00000169220.13	RGS14	1.180978319	0.043990313	0.237611336	0.039722166	0.174952764	3.34E-05	0.000162183	5	6	6
ENSG00000187595.10	ZNF385C	-1.180654716	-0.054954898	0.237739918	0.030571322	0.077819198	0.007085611	0.012452158	10	10	10
ENSG00000141560.10	FN3KRP	-1.180510655	-0.024058871	0.237797175	0.110971039	0.270321836	1.09E-07	1.17E-06	10	10	10
ENSG00000204138.8	PHACTR4	1.180355302	0.05843881	0.237858931	0.019081591	0.194049172	1.11E-05	6.50E-05	10	13	13
ENSG00000131188.7	PRR7	-1.180209941	-0.019327673	0.237916726	0.217812504	0.095927487	0.002661291	0.005761784	42	55	55
ENSG00000182199.6	SHMT2	1.180071817	0.034980288	0.237971653	0.090918538	0.052200408	0.02848475	0.036068661	17	23	23
ENSG00000155026.12	RSPH10B	-1.179278415	-0.042102684	0.238287331	0.039832214	0.044915914	0.042549664	0.048832485	31	34	34
ENSG00000132837.10	DMGDH	-1.179138243	-0.041869986	0.238343132	0.045939642	0.152665331	0.00011778	0.000464487	14	19	19
ENSG00000112578.5	BYSL	-1.178845453	-0.028581689	0.238459722	0.112786702	0.07248085	0.009456651	0.015676017	32	36	36
ENSG00000110455.9	ACCS	-1.178594574	-0.016662403	0.238559653	0.346754843	0.416825496	3.70E-12	1.32E-10	47	50	50
ENSG00000198231.8	DDX42	-1.176690313	-0.050052218	0.239319135	0.027914723	0.081296449	0.00587163	0.010764212	9	11	11
ENSG00000242866.5	STRC	-1.176052297	-0.036905573	0.239573978	0.047759345	0.119834836	0.000724567	0.002049581	15	19	19
ENSG00000164961.11	KIAA0196	1.174986839	0.913517821	0.239999981	0.000138881	0.04617174	0.03969272	0.04642916	1	1	1
ENSG00000105612.4	DNASE2	1.17481749	0.031668501	0.240067741	0.068337889	0.163875748	6.27E-05	0.000275749	22	26	26
ENSG00000136444.5	RSAD1	-1.173729343	-0.03247143	0.240503453	0.092462422	0.077420208	0.007240084	0.012662689	27	28	28
ENSG00000179361.13	ARID3B	1.172904627	0.031709191	0.240834054	0.074724541	0.069212078	0.011286779	0.017975412	29	30	30
ENSG00000148396.14	SEC16A	-1.17272362	-0.030177166	0.240906656	0.083889094	0.081107278	0.005931967	0.010839706	33	38	38
ENSG00000037241.3	RPL26L1	-1.1722436	-0.016692773	0.241099268	0.201753325	0.088536245	0.003970087	0.0079355	68	73	73
ENSG00000148386.5	LCN9	1.171961976	0.041720328	0.241212322	0.056746574	0.146881658	0.000162721	0.000606361	10	12	12
ENSG00000221843.2	C2orf16	1.171562004	0.025548223	0.24137295	0.125860918	0.072193039	0.009605049	0.015878765	35	37	37
ENSG00000143067.4	ZNF697	-1.16998741	-0.023646074	0.242006035	0.141519885	0.105953427	0.00154476	0.003771604	44	51	51
ENSG00000082212.7	ME2	1.168512702	0.261289734	0.242600019	0.001203609	0.054101479	0.025668744	0.033381894	1	1	1
ENSG00000160226.11	C21orf2	-1.167967489	-0.044959543	0.242819879	0.022848829	0.077062696	0.007381361	0.012860505	15	17	17
ENSG00000186207.4	LCE5A	-1.167153002	-0.033469506	0.243148587	0.072540219	0.055781609	0.023416772	0.031317395	35	41	41
ENSG00000132429.5	POPDC3	-1.166826365	-0.041929253	0.243280498	0.045852717	0.054336347	0.02534113	0.033035524	11	11	11
ENSG00000142449.8	FBN3	1.164221482	0.059344688	0.244334267	0.015435757	0.071772237	0.00982624	0.016139698	15	18	18
ENSG00000188130.9	MAPK12	-1.163761594	-0.023267691	0.244520641	0.145670832	0.238807247	7.73E-07	6.38E-06	21	28	28
ENSG00000242372.2	EIF6	1.163555615	0.447407325	0.244604147	0.000514915	0.121219125	0.000671673	0.001946072	2	2	2
ENSG00000155229.16	MMS19	1.161002875	0.04741359	0.24564073	0.032849272	0.045017466	0.042310947	0.048694781	8	9	9
ENSG00000086504.11	MRPL28	1.160185673	0.012224087	0.245973219	0.471912929	0.194128369	1.11E-05	6.48E-05	72	96	96
ENSG00000157881.9	PANK4	1.158576773	0.041378052	0.246628741	0.041362942	0.058309243	0.020401059	0.028252407	9	9	9
ENSG00000162600.7	OMA1	-1.158158607	-0.027437417	0.246799317	0.079482516	0.046196593	0.03963822	0.046395131	23	24	24
ENSG00000176390.10	CRLF3	1.158118074	0.021123797	0.246815855	0.174696861	0.279099501	6.22E-08	6.94E-07	25	29	29
ENSG00000160741.12	CRTC2	1.157988396	0.023329954	0.246868772	0.133242128	0.047215859	0.037468184	0.044238011	38	41	41
ENSG00000123545.5	NDUFAF4	1.155919003	0.035772776	0.247714289	0.065505778	0.151186677	0.000127944	0.000496001	15	19	19
ENSG00000138071.9	ACTR2	-1.154823935	-0.023748719	0.248162533	0.169624912	0.314736212	6.00E-09	8.57E-08	28	32	32
ENSG00000172057.5	ORMDL3	-1.154105467	-0.029703983	0.248456932	0.11173641	0.119939114	0.000720443	0.002042662	26	28	28
ENSG00000197182.8	FLJ27365	-1.153909383	-0.025592957	0.248537322	0.144272234	0.136314439	0.000292626	0.000991306	40	47	47
ENSG00000146587.13	RBAK	1.153627025	0.042230907	0.248653114	0.049314913	0.057714372	0.021073277	0.02889095	20	24	24
ENSG00000145506.9	NKD2	1.152556839	0.031138761	0.249092328	0.086329763	0.085026334	0.004799652	0.009244519	29	36	36
ENSG00000124191.13	TOX2	-1.152167162	-0.011797296	0.249252389	0.503754511	0.12703186	0.00048823	0.001513534	106	115	115
ENSG00000187961.9	KLHL17	1.151888676	0.043912662	0.249366822	0.083092651	0.094200338	0.002922201	0.00620072	19	69	69
ENSG00000196932.7	TMEM26	1.149047824	0.033788439	0.250536261	0.063416796	0.05383853	0.026040656	0.033686347	13	14	14
ENSG00000214530.3	STARD10	1.14849199	0.02855736	0.250765518	0.087022467	0.106641907	0.00148801	0.003654254	21	25	25
ENSG00000175161.9	CADM2	-1.147485657	-0.040387947	0.251180958	0.045863566	0.058064695	0.020674729	0.028501698	33	40	40
ENSG00000180398.7	MCFD2	-1.147151092	-0.023236963	0.251319181	0.172009711	0.132411566	0.00036304	0.001192237	30	35	35
ENSG00000168944.11	CEP120	-1.14695549	-0.618986092	0.251400017	0.00019115	0.09350307	0.00303461	0.006379929	1	2	2
ENSG00000082684.10	SEMA5B	1.144793266	0.046710863	0.252294805	0.048269559	0.049649149	0.032767586	0.039971146	22	30	30
ENSG00000196502.7	SULT1A1	1.144356893	0.047020882	0.252475658	0.031056142	0.051311365	0.029908066	0.037327325	9	14	14
ENSG00000233276.2	GPX1	-1.144012677	-0.026826892	0.25261838	0.084177508	0.18176939	2.26E-05	0.000118237	17	20	20
ENSG00000241399.2	CD302	1.143574834	0.299684226	0.252800003	0.000541812	0.140481517	0.000232299	0.000813347	1	1	1
ENSG00000160349.5	LCN1	-1.143219109	-0.020372263	0.25294763	0.190483199	0.347216229	6.45E-10	1.29E-08	37	46	46
ENSG00000180376.12	CCDC66	1.143064097	0.027903035	0.253011979	0.090744758	0.185599974	1.81E-05	9.82E-05	23	29	29
ENSG00000060709.9	RIMBP2	-1.140961204	-0.010133709	0.253886068	0.734928552	0.12783804	0.000467059	0.001461549	122	140	140
ENSG00000198715.7	C1orf85	-1.140714322	-0.015880656	0.253988825	0.36319182	0.12333227	0.000598209	0.001781867	58	68	68
ENSG00000176907.3	C8orf4	-1.139768434	-0.044037006	0.254382788	0.039987967	0.057986956	0.020762504	0.028568778	22	23	23
ENSG00000215717.5	TMEM167B	1.139088879	0.015954213	0.254666086	0.383753474	0.09665712	0.002558159	0.005617566	77	97	97
ENSG00000135597.14	REPS1	1.138620719	0.01796471	0.254861383	0.203670264	0.22512759	1.77E-06	1.34E-05	43	47	47
ENSG00000006282.15	SPATA20	-1.13834115	-0.01546865	0.254978058	0.309490294	0.431882106	1.12E-12	4.45E-11	32	34	34
ENSG00000065717.10	TLE2	1.138139559	0.01552043	0.255062212	0.308580552	0.205308372	5.75E-06	3.72E-05	78	101	101
ENSG00000163964.9	PIGX	-1.137957003	-0.041080803	0.255138437	0.046343701	0.083999054	0.005073691	0.009640143	15	18	18
ENSG00000125821.7	DTD1	-1.13751024	-0.02771071	0.255325046	0.071899838	0.162907279	6.62E-05	0.000287017	20	23	23
ENSG00000178623.7	GPR35	-1.136524263	-0.022656817	0.255737217	0.147271652	0.091900888	0.003309479	0.006847432	35	39	39
ENSG00000114166.7	KAT2B	1.136150291	0.025817255	0.25589367	0.105280787	0.085491178	0.004680556	0.009058128	26	29	29
ENSG00000100197.16	CYP2D6	-1.133592849	-0.014897746	0.256965374	0.333093851	0.462188913	9.21E-14	4.50E-12	35	39	39
ENSG00000081051.3	AFP	-1.133416305	-0.028510492	0.25703947	0.090014776	0.055519381	0.023754537	0.031602183	42	45	45
ENSG00000174332.3	GLIS1	1.132969507	0.022130225	0.257227059	0.144493832	0.095933245	0.002660461	0.005761784	73	73	73
ENSG00000134779.10	TPGS2	1.126367263	0.018139642	0.260010098	0.238494532	0.185807514	1.79E-05	9.73E-05	59	64	64
ENSG00000100908.9	EMC9	-1.126106043	-0.040809057	0.260120636	0.038738648	0.065135853	0.01407692	0.021374966	15	15	15
ENSG00000151632.12	AKR1C2	-1.125710839	-0.05704778	0.260287934	0.027289155	0.053258077	0.026881222	0.034432739	29	32	32
ENSG00000103037.7	SETD6	1.12368708	0.027949625	0.261145799	0.090065295	0.144616802	0.000184604	0.000669472	24	26	26
ENSG00000100580.7	TMED8	1.121065232	0.018700013	0.262260097	0.321669865	0.08280842	0.005410917	0.010117693	81	89	89
ENSG00000005700.10	IBTK	1.12054689	0.028698576	0.262480783	0.076148142	0.077039819	0.007390495	0.012870279	15	19	19
ENSG00000134330.14	IAH1	1.120346928	0.0173257	0.262565951	0.237158042	0.128748199	0.000444246	0.001408262	57	75	75
ENSG00000115590.9	IL1R2	1.120295413	0.01618738	0.262587896	0.296589952	0.163671256	6.34E-05	0.000277618	77	82	82
ENSG00000173480.6	ZNF417	-1.119680459	-0.020143412	0.262849955	0.192027157	0.325090462	2.98E-09	4.65E-08	52	71	71
ENSG00000108064.6	TFAM	-1.119650024	-0.033113117	0.262862929	0.07669373	0.142423889	0.000208548	0.000739941	7	11	11
ENSG00000164466.8	SFXN1	1.118752542	0.016826119	0.263245723	0.245666199	0.113043561	0.001050068	0.002739065	57	66	66
ENSG00000197980.7	LEKR1	1.118660771	0.129940104	0.263284887	0.004033131	0.055619701	0.023624737	0.031463889	3	3	3
ENSG00000124615.13	MOCS1	-1.118322152	-0.011638666	0.263429429	0.517064437	0.062736534	0.016034863	0.023517893	124	130	130
ENSG00000112280.11	COL9A1	1.118106506	0.71649078	0.263521508	0.000150801	0.06606782	0.013383139	0.020526338	4	5	5
ENSG00000154889.12	MPPE1	1.118101712	0.025295369	0.263523555	0.067839557	0.062376679	0.016351386	0.023856492	34	45	45
ENSG00000213077.5	FAM106A	1.118045615	0.062735515	0.263547512	0.020569923	0.109897166	0.001246469	0.003161053	14	37	37
ENSG00000187010.14	RHD	-1.117254644	-0.035982878	0.263885462	0.049796921	0.205409204	5.72E-06	3.71E-05	7	13	13
ENSG00000179632.5	MAF1	-1.117225551	-0.016200168	0.263897898	0.235769859	0.125692049	0.000525533	0.001612746	49	72	72
ENSG00000110057.3	UNC93B1	-1.11580491	-0.010496498	0.264505652	0.400070183	0.095801447	0.002679521	0.005786639	76	115	115
ENSG00000221819.2	C16orf3	1.115530867	0.023843728	0.264622999	0.119502272	0.266733429	1.37E-07	1.41E-06	23	31	31
ENSG00000241258.2	CRCP	1.115417103	0.075755846	0.264671724	0.009657875	0.062093134	0.016605235	0.024146398	6	16	16
ENSG00000123901.4	GPR83	1.113819423	0.036802813	0.265356663	0.052030222	0.05953131	0.019087545	0.026840523	29	33	33
ENSG00000099840.9	IZUMO4	-1.112968262	-0.023874098	0.265722061	0.12362784	0.056024227	0.023108618	0.030968512	39	48	48
ENSG00000168959.10	GRM5	-1.11222956	-0.014083928	0.266039461	0.315182525	0.065857068	0.013536948	0.020744816	73	89	89
ENSG00000029639.6	TFB1M	-1.111824596	-0.044131209	0.266213574	0.050185094	0.159841924	7.87E-05	0.000329938	8	8	8
ENSG00000196268.7	ZNF493	1.111749342	0.017055551	0.266245938	0.176827291	0.100103284	0.002122284	0.004856054	34	51	51
ENSG00000105875.9	WDR91	1.111158848	0.218994547	0.266499981	0.001341498	0.046635969	0.038687338	0.045413157	1	1	1
ENSG00000241186.3	TDGF1	-1.110790218	-0.020608968	0.266658658	0.174474171	0.30905198	8.78E-09	1.20E-07	21	23	23
ENSG00000122085.12	MTERFD2	-1.110738975	-0.038825341	0.266680721	0.076187151	0.221687594	2.17E-06	1.60E-05	28	31	31
ENSG00000235098.4	ANKRD65	1.11056246	0.060264289	0.266756729	0.035354491	0.058463943	0.02022984	0.028075717	10	14	14
ENSG00000164253.8	WDR41	-1.11032249	-0.029860385	0.266860085	0.100278231	0.128124576	0.000459755	0.001448623	16	18	18
ENSG00000103811.11	CTSH	-1.110242284	-0.018606257	0.266894637	0.285009398	0.175857275	3.17E-05	0.00015609	54	60	60
ENSG00000084676.11	NCOA1	-1.109535751	-0.02263032	0.26719913	0.159962122	0.061541279	0.017110781	0.024707788	39	46	46
ENSG00000136104.14	RNASEH2B	-1.108625029	-0.020099175	0.267591976	0.190907693	0.389814876	2.93E-11	8.52E-10	9	11	11
ENSG00000088682.9	COQ9	-1.107993955	-0.079078135	0.267864426	0.009486955	0.113741508	0.001010843	0.002663382	10	11	11
ENSG00000103021.5	CCDC113	1.107771678	0.018266339	0.267960435	0.189477493	0.128246314	0.000456686	0.001443937	62	67	67
ENSG00000064666.10	CNN2	1.107318821	0.030036835	0.26815611	0.078811395	0.115452009	0.000920744	0.002468735	20	33	33
ENSG00000180801.11	ARSJ	1.107023725	0.018775758	0.268283671	0.245322345	0.127367262	0.000479309	0.001493486	50	52	52
ENSG00000152642.6	GPD1L	-1.106894929	-0.028552617	0.268339359	0.081332924	0.155611687	9.98E-05	0.000404218	17	17	17
ENSG00000047578.8	KIAA0556	-1.106848598	-0.012564734	0.268359393	0.401479288	0.095528262	0.00271946	0.00584868	84	93	93
ENSG00000170248.9	PDCD6IP	1.1062293	0.043784079	0.268627284	0.035692424	0.119154615	0.000752048	0.002107724	23	25	25
ENSG00000170906.11	NDUFA3	1.105993593	0.030871009	0.268729292	0.087693745	0.211535622	3.98E-06	2.75E-05	16	21	21
ENSG00000140632.12	GLYR1	1.105592896	0.046399597	0.268902766	0.023304292	0.047788044	0.036303936	0.043269096	10	10	10
ENSG00000167332.7	OR51E2	-1.105516064	-0.030189612	0.268936038	0.083067441	0.078015931	0.007010664	0.012362091	34	39	39
ENSG00000164880.11	INTS1	1.105111109	0.016587225	0.269111448	0.217069828	0.497571728	4.16E-15	3.10E-13	12	14	14
ENSG00000125877.8	ITPA	1.104706289	0.014601664	0.269286877	0.321640931	0.229904724	1.33E-06	1.04E-05	61	74	74
ENSG00000204851.5	PNMAL2	-1.104641413	-0.049285015	0.269314999	0.028793739	0.0666529	0.012965315	0.020003117	5	5	5
ENSG00000101405.3	OXT	1.101902756	0.021064155	0.27050395	0.14483374	0.137852158	0.00026875	0.000919808	38	47	47
ENSG00000171928.9	TVP23B	1.101567367	0.037745361	0.270649802	0.045383526	0.069507069	0.011107929	0.017752509	17	23	23
ENSG00000138449.6	SLC40A1	-1.101065215	-0.037859151	0.270868275	0.053099843	0.133453184	0.000342758	0.001133787	7	9	9
ENSG00000144161.8	ZC3H8	-1.100635978	-0.027298757	0.27105512	0.10524144	0.129357568	0.000429591	0.001368936	25	31	31
ENSG00000169641.9	LUZP1	1.100593357	0.047874761	0.271073678	0.03883619	0.069247963	0.011264868	0.017954269	19	19	19
ENSG00000138400.8	MDH1B	-1.099984321	-0.022930903	0.271338953	0.140251849	0.354709391	3.80E-10	8.35E-09	20	23	23
ENSG00000172020.8	GAP43	1.099798409	0.021824682	0.271419966	0.232147401	0.047769733	0.036340611	0.043284554	57	64	64
ENSG00000068796.12	KIF2A	1.099659635	0.022268901	0.271480448	0.125787391	0.08639175	0.004458153	0.008720141	42	45	45
ENSG00000114796.11	KLHL24	1.098821142	0.028509472	0.271846089	0.093642121	0.225028892	1.78E-06	1.35E-05	29	46	46
ENSG00000134030.9	CTIF	1.098478997	0.015737343	0.271995384	0.310576466	0.054934127	0.024526379	0.032334528	86	94	94
ENSG00000184988.4	TMEM106A	1.097323537	0.627109181	0.272499985	0.000127036	0.069947371	0.010846268	0.017372341	1	1	1
ENSG00000101052.8	IFT52	-1.096865892	-0.763902661	0.272700021	0.000130552	0.081313118	0.005866343	0.010759921	1	1	1
ENSG00000152219.4	ARL14EP	-1.096627604	-0.020698163	0.272804216	0.188068886	0.123725783	0.000585434	0.001755268	44	51	51
ENSG00000133983.10	COX16	-1.095910501	-0.025791188	0.273117943	0.099525039	0.173639606	3.60E-05	0.000173651	34	39	39
ENSG00000104899.4	AMH	-1.094780957	-0.036798685	0.273612611	0.053531934	0.145275621	0.000177955	0.000650517	9	10	10
ENSG00000141556.16	TBCD	1.093835492	0.019029735	0.274027135	0.21578817	0.133435626	0.000343091	0.00113386	58	103	103
ENSG00000160999.8	SH2B2	-1.093803401	-0.030141053	0.274041212	0.07504902	0.14780257	0.000154574	0.00058134	9	10	10
ENSG00000110911.10	SLC11A2	1.093801219	0.022633801	0.274042169	0.140397562	0.060015467	0.018591179	0.026305104	42	49	49
ENSG00000179715.8	PCED1B	1.093664268	0.018469156	0.274102251	0.247453867	0.074784387	0.008348918	0.014207358	50	58	58
ENSG00000177946.4	CENPBD1	1.093332474	0.03851367	0.27424785	0.04548514	0.081858467	0.005695968	0.010510772	10	18	18
ENSG00000162769.8	FLVCR1	-1.092351029	-0.016862983	0.274678839	0.370020167	0.203262246	6.48E-06	4.15E-05	85	96	96
ENSG00000214402.6	LCNL1	1.091208098	0.041625576	0.275181325	0.039252616	0.082426026	0.005523905	0.010271115	9	13	13
ENSG00000137288.5	UQCC2	1.090080273	0.017278242	0.275677785	0.258863149	0.148478697	0.00014885	0.000562709	52	64	64
ENSG00000169313.9	P2RY12	1.090029836	0.357240881	0.275700002	0.000523915	0.063446044	0.015428816	0.022894641	1	1	1
ENSG00000112110.5	MRPL18	-1.088324059	-0.087378707	0.276452073	0.014693093	0.069331127	0.011214255	0.017898938	5	7	7
ENSG00000106868.12	SUSD1	1.088088932	0.024208283	0.276555849	0.112508601	0.080886897	0.006003041	0.010939223	32	36	36
ENSG00000185760.11	KCNQ5	-1.087925725	-0.049500092	0.276627899	0.027892165	0.045029433	0.042282908	0.048694781	20	22	22
ENSG00000111254.3	AKAP3	1.085770913	0.009302067	0.277580358	0.683177136	0.188454114	1.54E-05	8.58E-05	126	140	140
ENSG00000182118.5	FAM89A	1.082602481	0.015115674	0.278984906	0.289878768	0.336372226	1.37E-09	2.42E-08	38	39	39
ENSG00000178796.8	RIIAD1	-1.081295268	-0.019129623	0.279565792	0.196015182	0.071500336	0.009971877	0.016300712	55	63	63
ENSG00000109919.5	MTCH2	-1.081039195	-0.036386216	0.279679679	0.042859794	0.04446953	0.043615581	0.04975868	7	8	8
ENSG00000196655.5	TRAPPC4	-1.081015414	-0.014998047	0.279690257	0.322993516	0.339577599	1.10E-09	2.00E-08	36	38	38
ENSG00000106524.4	ANKMY2	1.079368841	0.024261524	0.280423335	0.110050164	0.113923142	0.001000876	0.002640767	47	51	51
ENSG00000189241.6	TSPYL1	-1.078972459	-0.333975602	0.280600005	0.000531521	0.060341976	0.01826384	0.025931879	1	1	1
ENSG00000186115.8	CYP4F2	-1.078846725	-0.033518834	0.280656062	0.061394477	0.122195597	0.000636679	0.001873533	19	22	22
ENSG00000214872.4	SMTNL1	-1.076676365	-0.014773438	0.281624875	0.302114322	0.314892728	5.94E-09	8.51E-08	55	64	64
ENSG00000065526.6	SPEN	1.073887958	0.021542729	0.282872901	0.162043125	0.113089638	0.001047433	0.002734144	47	55	55
ENSG00000197417.7	SHPK	1.072547821	0.023148906	0.283474047	0.121108465	0.261104931	1.95E-07	1.91E-06	14	14	14
ENSG00000100612.9	DHRS7	-1.072134129	-0.0204282	0.283659792	0.179668196	0.327757666	2.48E-09	4.02E-08	57	58	58
ENSG00000129757.8	CDKN1C	1.071691936	0.020137574	0.283858424	0.190033499	0.17622795	3.11E-05	0.000153854	47	49	49
ENSG00000151748.10	SAV1	-1.071181397	-0.054434542	0.284087874	0.028485671	0.062939378	0.015859182	0.023334144	5	5	5
ENSG00000235711.3	ANKRD34C	-1.070757529	-0.042285801	0.284278468	0.027193086	0.069000843	0.011416627	0.018126871	7	8	8
ENSG00000065054.9	SLC9A3R2	-1.070648901	-0.020621262	0.284327327	0.153682243	0.089811398	0.003705531	0.007505293	38	45	45
ENSG00000227268.3	KLLN	-1.069975565	-0.012188327	0.284630308	0.333351436	0.115976967	0.000894722	0.00241694	61	72	72
ENSG00000267368.1	UPK3BL	-1.069046462	-0.018421361	0.285048734	0.180573493	0.146502941	0.000166194	0.000614907	24	28	28
ENSG00000101224.13	CDC25B	-1.068744776	-0.024022584	0.28518469	0.100976067	0.052368308	0.028223818	0.035812123	35	39	39
ENSG00000268175.1	AC117395.1	-1.0636616	-0.012660822	0.287482026	0.40219649	0.102932246	0.001820276	0.004285864	131	139	139
ENSG00000135587.4	SMPD2	-1.063167915	-0.028429139	0.28770581	0.098347011	0.101581027	0.001958792	0.00455953	43	46	46
ENSG00000108389.5	MTMR4	-1.063041938	-0.244336202	0.287762933	0.001006455	0.054069352	0.025713893	0.033381894	5	5	5
ENSG00000104938.12	CLEC4M	1.061810583	0.012339426	0.288321684	0.439171268	0.10157925	0.001958981	0.00455953	80	106	106
ENSG00000090686.11	USP48	-1.061713387	-0.02863885	0.28836582	0.060684178	0.055116044	0.024283766	0.032136733	16	20	20
ENSG00000117899.6	MESDC2	1.060605445	0.029613417	0.288869247	0.07764838	0.120338812	0.000704849	0.00201094	37	39	39
ENSG00000105509.6	HAS1	-1.060183149	-0.020838536	0.289061286	0.141051428	0.059498541	0.019121621	0.026857416	42	51	51
ENSG00000165271.12	NOL6	1.059290731	0.01696952	0.289467395	0.2005127	0.361871675	2.28E-10	5.33E-09	20	22	22
ENSG00000042286.10	AIFM2	1.058087221	0.02653679	0.29001568	0.074457849	0.101400496	0.001978074	0.004589344	29	30	30
ENSG00000166268.6	MYRFL	1.056593503	0.034396857	0.290697147	0.054009266	0.18819349	1.56E-05	8.68E-05	9	10	10
ENSG00000007080.6	CCDC124	1.056193316	0.030150931	0.290879904	0.061589233	0.052948719	0.027340464	0.034898028	18	21	21
ENSG00000119328.7	FAM206A	1.055800037	0.035648273	0.291059581	0.044314582	0.08059668	0.006097938	0.011078981	14	16	16
ENSG00000124225.11	PMEPA1	-1.055629258	-0.018078148	0.291137628	0.127546492	0.053660709	0.026295275	0.033883693	49	56	56
ENSG00000137561.4	TTPA	1.055080409	0.045934733	0.291388551	0.02970504	0.045642877	0.040870948	0.047479802	14	16	16
ENSG00000198554.7	WDHD1	1.05426407	0.014541694	0.291762034	0.271171865	0.214915063	3.26E-06	2.30E-05	47	52	52
ENSG00000146530.7	VWDE	-1.054228742	-0.019072363	0.291778204	0.183063324	0.200706653	7.53E-06	4.69E-05	38	40	40
ENSG00000006459.6	JHDM1D	1.054102692	0.022950156	0.291835904	0.145074094	0.047492946	0.036899665	0.043750656	47	48	48
ENSG00000054611.9	TBC1D22A	1.054019073	0.052661953	0.291874185	0.027009354	0.059875194	0.018733628	0.026419644	8	8	8
ENSG00000180611.6	MB21D2	-1.053473645	-0.0176627	0.292123967	0.234985783	0.131475829	0.000382268	0.001238674	69	76	76
ENSG00000013523.5	ANGEL1	-1.052992966	-0.015685182	0.292344216	0.287420647	0.124898354	0.000548946	0.001674743	60	68	68
ENSG00000256294.3	ZNF225	-1.052133674	-0.0349027	0.292738224	0.048302832	0.13541964	0.000307471	0.001033922	4	5	5
ENSG00000144152.8	FBLN7	-1.050659919	-0.019109573	0.29341481	0.193107982	0.105587376	0.001575802	0.003826192	36	43	43
ENSG00000256043.2	CTSO	1.048222427	0.308783962	0.29453614	0.000678946	0.08010813	0.00626109	0.011296718	3	3	3
ENSG00000154380.12	ENAH	1.047078157	0.293293201	0.295063533	0.000628548	0.052843133	0.027499035	0.035075911	3	3	3
ENSG00000164615.3	CAMLG	1.045535313	0.0146156	0.295775628	0.203364988	0.317548333	4.97E-09	7.32E-08	31	31	31
ENSG00000163586.5	FABP1	1.045220687	0.017177139	0.295920984	0.194035751	0.405132506	9.16E-12	3.07E-10	27	55	55
ENSG00000155660.6	PDIA4	-1.04374427	-0.049117157	0.296603722	0.030139829	0.073412113	0.008992078	0.015104745	21	21	21
ENSG00000187630.10	DHRS4L2	1.043306986	0.035665768	0.296806136	0.050974795	0.173304466	3.67E-05	0.000176536	33	43	43
ENSG00000008226.15	DLEC1	1.042735304	0.015379791	0.297070902	0.314322418	0.157212029	9.13E-05	0.00037698	63	65	65
ENSG00000148814.13	LRRC27	-1.042143194	-0.02167061	0.297345295	0.118764247	0.242851149	6.03E-07	5.19E-06	15	16	16
ENSG00000115415.14	STAT1	1.041543227	0.02628782	0.297623502	0.077830894	0.067530337	0.01236322	0.019212178	24	25	25
ENSG00000204604.5	ZNF468	-1.041372876	-0.016859564	0.297702526	0.185528838	0.085103148	0.004779766	0.009220805	39	55	55
ENSG00000121691.4	CAT	1.040662734	0.01652896	0.298032105	0.199701341	0.07171077	0.009858975	0.016159557	52	54	54
ENSG00000111665.7	CDCA3	-1.04005943	-0.321045604	0.298312291	0.000735089	0.210752295	4.17E-06	2.85E-05	3	23	23
ENSG00000102882.7	MAPK3	-1.039493626	-0.030447775	0.298575221	0.062803802	0.106956623	0.001462762	0.003602015	8	11	11
ENSG00000161860.7	SYCE2	1.039364057	0.019858468	0.298635454	0.166203993	0.146908139	0.000162481	0.000606085	38	42	42
ENSG00000137767.9	SQRDL	-1.038197016	-0.034427737	0.299178341	0.047674073	0.074545961	0.008457254	0.014365776	23	29	29
ENSG00000204084.8	INPP5B	-1.037953726	-0.04563083	0.299291599	0.024184075	0.071337674	0.010060038	0.016400213	11	15	15
ENSG00000163945.11	UVSSA	1.0373179	0.026063614	0.299587726	0.111686478	0.220962934	2.27E-06	1.67E-05	25	33	33
ENSG00000183675.10	PTPN20B	1.036623213	0.030357625	0.299911491	0.069573859	0.089241052	0.003821615	0.007689976	16	17	17
ENSG00000133398.3	MED10	-1.036559216	-0.023607565	0.299941329	0.111682947	0.128557014	0.000448944	0.001421923	27	28	28
ENSG00000080166.11	DCT	1.035302146	0.02439103	0.300527828	0.103647723	0.269040969	1.18E-07	1.25E-06	38	39	39
ENSG00000168077.9	SCARA3	1.03523716	0.034824213	0.300558169	0.050702441	0.079548236	0.006453444	0.011592231	8	8	8
ENSG00000174194.11	AGAP8	-1.03488586	-0.016044038	0.300722219	0.265098788	0.33445756	1.57E-09	2.75E-08	31	42	42
ENSG00000160194.13	NDUFV3	-1.034844732	-0.025581142	0.300741429	0.091742742	0.096268906	0.002612527	0.005695854	27	33	33
ENSG00000148943.7	LIN7C	1.034534835	0.02126366	0.300886201	0.160175741	0.050897545	0.030595177	0.03797722	42	45	45
ENSG00000174136.7	RGMB	-1.034432473	-0.040622105	0.30093403	0.0548935	0.075319205	0.008110942	0.013860524	13	15	15
ENSG00000134757.4	DSG3	-1.033435822	-0.166125904	0.30139999	0.002206338	0.050965324	0.030481541	0.037914857	1	1	1
ENSG00000143740.10	SNAP47	-1.033246201	-0.034722664	0.301488697	0.059841023	0.053033784	0.027213393	0.034794785	26	29	29
ENSG00000214237.5	FAM188B2	1.032718294	0.029611926	0.30173575	0.070954528	0.064347162	0.014692335	0.022089006	15	17	17
ENSG00000163362.6	C1orf106	-1.032547282	-0.02649603	0.30181581	0.09169072	0.072001754	0.009704969	0.01600049	25	27	27
ENSG00000196923.9	PDLIM7	-1.030879066	-0.013270889	0.302597534	0.354369301	0.104105944	0.001707881	0.00407642	56	77	77
ENSG00000101333.12	PLCB4	1.029808283	0.307731172	0.303100012	0.000634834	0.058996545	0.019651432	0.027422266	1	1	1
ENSG00000143751.9	SDE2	1.029760478	0.020487893	0.303122458	0.153227034	0.05736371	0.021480027	0.029281536	37	44	44
ENSG00000175711.4	B3GNTL1	1.029324803	0.024410616	0.303327072	0.118325862	0.253099041	3.20E-07	2.96E-06	11	16	16
ENSG00000172785.14	CBWD1	1.027919553	0.055816002	0.303987671	0.016607977	0.191052242	1.32E-05	7.55E-05	14	21	21
ENSG00000172346.10	CSDC2	-1.027536115	-0.01980217	0.304168089	0.14568699	0.241064927	6.73E-07	5.70E-06	27	30	30
ENSG00000156787.12	TBC1D31	1.025788592	0.022135478	0.304991244	0.098149677	0.065210135	0.014020316	0.021306734	41	41	41
ENSG00000198093.6	ZNF649	-1.024838624	-0.031752778	0.305439338	0.091758009	0.131682736	0.000377932	0.001225995	14	14	14
ENSG00000125430.4	HS3ST3B1	-1.024681191	-0.01423218	0.305513641	0.385953383	0.062459074	0.01627836	0.023787963	83	90	90
ENSG00000178234.8	GALNT11	1.024585777	0.018542085	0.305558678	0.202287255	0.114749672	0.000956734	0.002548393	43	45	45
ENSG00000169398.15	PTK2	-1.024263447	-0.020593295	0.305710858	0.123682179	0.073984047	0.00871819	0.014705046	36	37	37
ENSG00000041988.11	THAP3	1.023280364	0.014085451	0.306175305	0.224388546	0.111138324	0.001164988	0.002983422	42	50	50
ENSG00000185730.3	ZNF696	-1.023258414	-0.016335958	0.30618568	0.180148774	0.133757215	0.000337052	0.001118967	36	45	45
ENSG00000164344.11	KLKB1	-1.022141871	-0.029339395	0.306713758	0.055167404	0.049951937	0.03222658	0.039452436	20	21	21
ENSG00000111325.12	OGFOD2	1.022013608	0.014203227	0.30677446	0.343937141	0.195523829	1.02E-05	6.06E-05	65	89	89
ENSG00000053328.8	METTL24	1.021794722	0.011986638	0.306878068	0.36956361	0.064380674	0.014665641	0.022057955	71	81	81
ENSG00000176222.7	ZNF404	1.020600836	0.022279617	0.307443593	0.171135438	0.182399432	2.18E-05	0.000114523	64	75	75
ENSG00000140470.9	ADAMTS17	-1.020497726	-0.140038747	0.307492467	0.002855041	0.06961843	0.011041156	0.017661252	4	5	5
ENSG00000095261.9	PSMD5	-1.020258839	-0.018365462	0.307605719	0.213803257	0.217261256	2.83E-06	2.03E-05	37	45	45
ENSG00000152749.7	GPR180	-1.017979017	-0.00770856	0.308687928	0.770912026	0.158968924	8.27E-05	0.000344222	135	155	155
ENSG00000163820.10	FYCO1	1.017817449	0.01105799	0.308764718	0.409350541	0.075664812	0.00796079	0.013642236	124	145	145
ENSG00000103510.15	KAT8	-1.016422758	-0.017898099	0.309428113	0.144577488	0.146800264	0.000163462	0.000607879	25	41	41
ENSG00000197262.8	CCL4L2	1.016338367	0.025151952	0.309468284	0.135223346	0.068367001	0.011815351	0.018598226	30	35	35
ENSG00000072786.8	STK10	1.015524168	0.048278739	0.309856032	0.021881867	0.141567103	0.000218714	0.00076947	8	10	10
ENSG00000157954.10	WIPI2	1.014795332	0.029308016	0.310203399	0.058895803	0.068069459	0.01200733	0.018835465	24	29	29
ENSG00000174446.8	SNAPC5	1.013527024	0.029036217	0.310808495	0.076423385	0.116507304	0.000869172	0.002366955	21	23	23
ENSG00000165646.7	SLC18A2	1.011646302	0.0389867	0.311707199	0.037933873	0.147766204	0.000154888	0.000581553	5	5	5
ENSG00000166452.7	AKIP1	1.011070828	0.019229861	0.311982531	0.185652856	0.075988578	0.007822655	0.013498368	48	50	50
ENSG00000105808.13	RASA4	-1.010908891	-0.020926264	0.312060038	0.119854609	0.106185169	0.001525423	0.003733655	23	32	32
ENSG00000167850.3	CD300C	1.010291125	0.019879294	0.312355832	0.161802419	0.163017459	6.58E-05	0.000285671	29	31	31
ENSG00000166321.9	NUDT13	1.007612126	0.028745671	0.313640705	0.082755219	0.051709005	0.029262687	0.036722655	19	24	24
ENSG00000106258.9	CYP3A5	1.007457184	0.026397626	0.313715123	0.078772224	0.085779176	0.004608254	0.00895141	33	40	40
ENSG00000102924.7	CBLN1	-1.007325177	-0.019759549	0.313778535	0.132579931	0.050539721	0.031202329	0.038521368	55	66	66
ENSG00000157856.6	DRC1	1.007230032	0.02847591	0.313824244	0.071250621	0.082580365	0.005478021	0.010227458	27	32	32
ENSG00000213462.4	ERV3-1	-1.006880322	-0.020974585	0.31399229	0.12641514	0.398769629	1.49E-11	4.65E-10	18	26	26
ENSG00000159063.8	ALG8	-1.006384772	-0.033639268	0.314230516	0.056101214	0.069311273	0.011226317	0.017910362	32	32	32
ENSG00000079308.12	TNS1	-1.006032258	-0.030996445	0.314400053	0.054709606	0.051047044	0.030345104	0.037795276	19	21	21
ENSG00000168038.6	ULK4	-1.005576212	-0.02776618	0.314619472	0.075325741	0.213418073	3.56E-06	2.47E-05	16	19	19
ENSG00000164758.3	MED30	1.005116951	0.045650092	0.314840539	0.02490016	0.048729334	0.034468888	0.041549376	11	11	11
ENSG00000150433.5	TMEM218	1.005014579	0.016090653	0.31488983	0.183851524	0.079322736	0.006532576	0.011676939	40	43	43
ENSG00000035664.7	DAPK2	1.004444118	0.017833434	0.315164594	0.165223134	0.059924501	0.01868343	0.026402921	51	55	55
ENSG00000186812.8	ZNF397	-1.003955603	-0.435184794	0.315400014	0.000537375	0.078283964	0.006909831	0.012213776	1	1	1
ENSG00000092969.7	TGFB2	-1.003605603	-0.015391506	0.315568753	0.274792135	0.079432952	0.006493779	0.011641779	54	61	61
ENSG00000126259.15	KIRREL2	1.003390628	0.019759661	0.315672424	0.159575011	0.096924024	0.002521434	0.005560325	51	65	65
ENSG00000182557.3	SPNS3	1.002366179	0.023548716	0.31616677	0.095339034	0.101076675	0.002013134	0.004644133	35	38	38
ENSG00000006128.7	TAC1	-1.002297401	-0.159915421	0.316199977	0.001851085	0.047729617	0.036421096	0.043366273	1	3	3
ENSG00000196591.7	HDAC2	-1.002188725	-0.026495216	0.316252452	0.080574403	0.151340189	0.00012685	0.00049333	14	17	17
ENSG00000162069.10	CCDC64B	1.001463307	0.011099031	0.316602871	0.336758911	0.072582816	0.009404631	0.015596864	68	80	80
ENSG00000152457.13	DCLRE1C	-1.000706053	-0.015565177	0.31696894	0.19632979	0.104906968	0.001635156	0.003935194	42	51	51
ENSG00000181896.7	ZNF101	-0.999773054	-0.028148023	0.317420349	0.062215891	0.082899418	0.005384371	0.010093898	15	20	20
ENSG00000205730.5	ITPRIPL2	-0.999549481	-0.035969413	0.317528582	0.044883393	0.054749473	0.024775165	0.032509944	16	21	21
ENSG00000039560.9	RAI14	-0.999147304	-0.054582837	0.317723339	0.019130634	0.064048818	0.014932153	0.022375861	5	6	6
ENSG00000137135.13	ARHGEF39	0.998942391	0.024673528	0.317822599	0.157916554	0.075972138	0.007829611	0.013499793	38	45	45
ENSG00000184925.7	LCN12	-0.998404476	-0.023782245	0.318083264	0.142933394	0.138645171	0.000257199	0.000886924	53	68	68
ENSG00000156990.10	RPUSD3	0.997534148	0.028517262	0.318505307	0.10965205	0.298698125	1.74E-08	2.22E-07	17	19	19
ENSG00000168491.5	CCDC110	-0.996742692	-0.042105341	0.318889422	0.039907944	0.055640247	0.023598243	0.031463026	10	10	10
ENSG00000099917.13	MED15	-0.995060477	-0.02521479	0.319706852	0.106442599	0.075956042	0.007836428	0.013505169	28	33	33
ENSG00000137154.8	RPS6	-0.994457901	-0.754824939	0.319999992	0.000147401	0.063739673	0.015184826	0.022642996	1	1	1
ENSG00000169045.13	HNRNPH1	-0.993466409	-0.012151251	0.320482712	0.330718998	0.068719193	0.011592102	0.018335866	63	87	87
ENSG00000108774.10	RAB5C	-0.992314026	-0.385815665	0.321044363	0.000445433	0.047817224	0.036245567	0.043241867	3	4	4
ENSG00000134744.9	ZCCHC11	-0.991422559	-0.051304132	0.321479289	0.021109055	0.071116107	0.010181386	0.016517499	13	14	14
ENSG00000157379.9	DHRS1	0.989862914	0.013206415	0.322241129	0.441688486	0.283715859	4.62E-08	5.34E-07	70	78	78
ENSG00000106648.9	GALNTL5	-0.989230691	-0.013980575	0.322550286	0.194307655	0.094093192	0.002939201	0.006218726	43	48	48
ENSG00000127580.11	WDR24	0.98814429	0.027499972	0.323081987	0.057414053	0.069392303	0.011177169	0.017847546	14	19	19
ENSG00000205710.3	C17orf107	-0.987819912	-0.027839293	0.323240854	0.099569258	0.053940114	0.025896331	0.03354474	27	32	32
ENSG00000182986.8	ZNF320	-0.986046295	-0.010954042	0.324110396	0.49282779	0.344248875	7.94E-10	1.53E-08	89	110	110
ENSG00000241553.8	ARPC4	-0.985256255	-0.157398917	0.324498214	0.001948813	0.068372938	0.011811552	0.018598226	20	20	20
ENSG00000143627.13	PKLR	0.984533778	0.020424543	0.324853132	0.121212204	0.09752292	0.002440926	0.005423898	29	32	32
ENSG00000135373.8	EHF	-0.984422965	-0.021441453	0.324907591	0.119937955	0.077700594	0.007131182	0.012514177	53	53	53
ENSG00000237190.3	CDKN2AIPNL	-0.984242154	-0.061643262	0.324996464	0.021779522	0.196210808	9.80E-06	5.86E-05	6	7	7
ENSG00000157326.14	DHRS4	0.984080552	0.017332789	0.325075908	0.155059159	0.111593608	0.001136441	0.002922614	46	51	51
ENSG00000010282.10	HHATL	0.983472566	0.011301341	0.325374911	0.370484964	0.231257209	1.22E-06	9.60E-06	93	106	106
ENSG00000111671.5	SPSB2	-0.982738901	-0.066479234	0.32573596	0.035431704	0.340568319	1.03E-09	1.88E-08	21	84	84
ENSG00000141030.8	COPS3	-0.982276594	-0.036192798	0.325963602	0.035810439	0.071267737	0.010098183	0.016440947	8	10	10
ENSG00000101198.10	NKAIN4	0.981702906	0.049158389	0.326246233	0.023885568	0.067196195	0.012589113	0.01950511	15	15	15
ENSG00000163521.11	GLB1L	-0.981605376	-0.013202347	0.326294298	0.369945344	0.139566373	0.000244395	0.000847741	95	104	104
ENSG00000167094.11	TTC16	0.980503893	0.020730867	0.326837449	0.31379914	0.092112364	0.003271824	0.0067849	68	81	81
ENSG00000114790.8	ARHGEF26	0.978959501	0.665839688	0.327599991	0.000127896	0.067683867	0.012260802	0.019118105	1	1	1
ENSG00000197599.8	CCDC154	0.977650065	0.018317261	0.328247427	0.162002602	0.194463233	1.08E-05	6.37E-05	24	26	26
ENSG00000100614.13	PPM1A	-0.977448608	-0.025263307	0.328347109	0.090280808	0.113348806	0.001032731	0.002703498	28	32	32
ENSG00000166831.4	RBPMS2	0.977424017	0.013927815	0.328359278	0.145414399	0.06764677	0.01228547	0.019148394	29	36	36
ENSG00000203727.3	SAMD5	0.976879071	0.026948417	0.328629024	0.047094403	0.088069837	0.004071486	0.008107118	8	9	9
ENSG00000140598.9	EFTUD1	-0.975933577	-0.037060525	0.329097382	0.043891398	0.05810764	0.020626401	0.028467314	15	17	17
ENSG00000142082.10	SIRT3	0.974723566	0.027499252	0.3296974	0.064141546	0.066763057	0.012888132	0.019909272	21	33	33
ENSG00000171574.13	ZNF584	0.974181772	0.04362437	0.329966294	0.025012623	0.056618165	0.022371536	0.03019625	6	9	9
ENSG00000269883.1	AC007375.1	0.973274751	0.033250807	0.330416768	0.048163651	0.194846583	1.06E-05	6.26E-05	6	8	8
ENSG00000121410.7	A1BG	0.97297905	0.033851138	0.330563715	0.062889614	0.092558326	0.003193811	0.006660946	7	13	13
ENSG00000139219.13	COL2A1	-0.970663915	-0.016302109	0.331715667	0.234787461	0.080714843	0.006059121	0.011019421	70	80	80
ENSG00000085465.11	OVGP1	0.970541459	0.021594719	0.33177667	0.143709277	0.154404945	0.000106837	0.000428269	64	66	66
ENSG00000183891.5	TTC32	-0.969077669	-0.021499676	0.332506439	0.248722293	0.446584639	3.39E-13	1.47E-11	27	28	28
ENSG00000073008.10	PVR	0.968090104	0.038426959	0.332999372	0.032022739	0.101300961	0.001988786	0.004608341	16	19	19
ENSG00000008988.5	RPS20	0.967764611	0.027011937	0.333161942	0.069736959	0.086871167	0.004344091	0.008542794	17	21	21
ENSG00000063438.12	AHRR	0.967052318	0.040921109	0.33351788	0.036906148	0.144992493	0.000180783	0.000656908	5	8	8
ENSG00000186272.8	ZNF17	0.966630515	0.023012065	0.333728774	0.13477196	0.180782283	2.39E-05	0.000123543	32	32	32
ENSG00000267970.1	AC004899.1	0.96662616	0.013945111	0.333730952	0.155929255	0.232269792	1.15E-06	9.13E-06	36	49	49
ENSG00000197616.7	MYH6	0.966241617	0.046245378	0.333923293	0.030081735	0.054828598	0.024668246	0.032392923	11	13	13
ENSG00000176472.6	ZNF575	0.965578535	0.02685614	0.33425512	0.079562753	0.156069444	9.73E-05	0.000397041	40	46	46
ENSG00000204351.7	SKIV2L	0.96441908	0.02886682	0.33483586	0.055121227	0.156650484	9.42E-05	0.000386446	25	29	29
ENSG00000186153.12	WWOX	-0.964157517	-0.011136137	0.33496696	0.374603624	0.348433169	5.92E-10	1.21E-08	80	84	84
ENSG00000137806.4	NDUFAF1	0.963618928	0.014006884	0.335237014	0.242077147	0.458973748	1.21E-13	5.59E-12	21	24	24
ENSG00000062598.13	ELMO2	-0.963492958	-0.020252653	0.335300196	0.133120015	0.08475659	0.004870145	0.009331079	40	42	42
ENSG00000122591.7	FAM126A	-0.963179346	-0.010889011	0.335457528	0.602113328	0.208164213	4.86E-06	3.22E-05	99	112	112
ENSG00000166402.4	TUB	-0.962790804	-0.034625398	0.335652517	0.056476855	0.048039296	0.035804515	0.042799574	19	21	21
ENSG00000254997.2	KRTAP5-9	-0.96142116	-0.030011385	0.336340449	0.053673682	0.071444999	0.010001781	0.016327671	32	36	36
ENSG00000173409.9	ARV1	-0.960920648	-0.018053719	0.336592068	0.157719529	0.251749233	3.48E-07	3.19E-06	30	33	33
ENSG00000092199.13	HNRNPC	0.960729096	0.023303607	0.336688398	0.090490683	0.132467136	0.000361929	0.001189657	21	29	29
ENSG00000167083.2	GNGT2	-0.958896519	-0.038095844	0.337610879	0.033195442	0.065963107	0.013459338	0.02063454	6	6	6
ENSG00000186446.7	ZNF501	-0.957961597	-0.039497288	0.338082124	0.027085248	0.064219247	0.014794677	0.022224571	4	4	4
ENSG00000070770.4	CSNK2A2	0.956553623	0.161989301	0.338792607	0.001920519	0.060800482	0.017814	0.025461466	3	3	3
ENSG00000161813.16	LARP4	-0.954437691	-0.028090423	0.339862135	0.089091505	0.141607665	0.000218222	0.000769342	14	18	18
ENSG00000123338.8	NCKAP1L	0.954342629	0.022661578	0.339910237	0.092783987	0.085905679	0.004576849	0.008904616	33	43	43
ENSG00000143891.12	GALM	-0.954098079	-0.019088595	0.340033998	0.114803429	0.166263303	5.48E-05	0.000247144	21	23	23
ENSG00000005020.8	SKAP2	0.954045783	0.022826677	0.340060468	0.080228183	0.059031341	0.019614232	0.027380819	31	35	35
ENSG00000096996.11	IL12RB1	-0.953820921	-0.049955268	0.340174297	0.018402404	0.050964666	0.030482642	0.037914857	8	8	8
ENSG00000155970.7	MICU3	-0.95329188	-0.014900312	0.340442205	0.236878622	0.064709287	0.014406467	0.021748759	58	64	64
ENSG00000136108.10	CKAP2	0.952138792	0.04881188	0.341026598	0.022440816	0.069168696	0.011313324	0.018001986	15	16	16
ENSG00000214941.3	ZSWIM7	0.951352138	0.018370176	0.341425648	0.134465885	0.256753332	2.55E-07	2.44E-06	14	15	15
ENSG00000148690.10	FRA10AC1	-0.950384306	-0.01426381	0.341917015	0.289429707	0.495594591	4.97E-15	3.63E-13	28	29	29
ENSG00000041802.6	LSG1	-0.950234065	-0.013839257	0.341993333	0.200542898	0.279695151	5.99E-08	6.75E-07	32	39	39
ENSG00000170703.11	TTLL6	0.949460453	0.01490651	0.342386477	0.211801728	0.207006938	5.20E-06	3.41E-05	34	38	38
ENSG00000124588.15	NQO2	-0.94858612	-0.034153005	0.342831153	0.072561589	0.186289006	1.74E-05	9.51E-05	16	19	19
ENSG00000134760.5	DSG1	-0.948059512	-0.03420637	0.343099158	0.043604619	0.061151386	0.017477321	0.025078406	16	16	16
ENSG00000172586.7	CHCHD1	-0.947451906	-0.009287755	0.343408552	0.346860173	0.136251799	0.000293642	0.000993825	83	111	111
ENSG00000095539.11	SEMA4G	0.945507169	0.603333952	0.344400013	0.00014117	0.054186619	0.025549488	0.03323936	1	1	1
ENSG00000085265.6	FCN1	0.945036804	0.058695562	0.344640087	0.021735456	0.059108917	0.019531555	0.027286266	12	12	12
ENSG00000186470.9	BTN3A2	-0.944953041	-0.0178017	0.34468285	0.1819426	0.422431768	2.38E-12	8.96E-11	109	113	113
ENSG00000185917.9	SETD4	-0.944392805	-0.023083067	0.344968957	0.089391131	0.250827261	3.69E-07	3.34E-06	21	25	25
ENSG00000139132.10	FGD4	-0.944332063	-0.260932848	0.344999986	0.000662165	0.054503253	0.025110906	0.032844287	1	1	1
ENSG00000143382.9	ADAMTSL4	0.944287303	0.043777099	0.345022852	0.023953063	0.045897607	0.040299012	0.046987843	3	4	4
ENSG00000197562.5	RAB40C	-0.944216988	-0.058435151	0.345058776	0.016978175	0.054331695	0.025347578	0.033035524	8	12	12
ENSG00000088053.7	GP6	-0.943551223	-0.033957442	0.345399028	0.044439144	0.275312532	7.92E-08	8.66E-07	9	13	13
ENSG00000079101.12	CLUL1	0.942977126	0.016923322	0.345692603	0.151904944	0.169075879	4.67E-05	0.000217134	30	37	37
ENSG00000104738.12	MCM4	0.9424856	0.01006672	0.34594408	0.297060716	0.25497281	2.85E-07	2.67E-06	51	57	57
ENSG00000168589.10	DYNLRB2	0.941211339	0.022512926	0.346596567	0.09137954	0.072022117	0.009694283	0.01599622	33	34	34
ENSG00000180573.8	HIST1H2AC	0.940708182	0.047243515	0.346854425	0.019698908	0.047139299	0.037626851	0.044396639	20	24	24
ENSG00000132561.9	MATN2	0.938726275	0.015116507	0.3478713	0.131383822	0.053257786	0.02688165	0.034432739	45	51	51
ENSG00000182782.7	HCAR2	-0.938221431	-0.043803143	0.348130627	0.027219495	0.052597995	0.027870814	0.035438725	10	14	14
ENSG00000182230.7	FAM153B	-0.937489085	-0.011712988	0.348507036	0.290150053	0.109700638	0.001259879	0.003188419	66	75	75
ENSG00000115255.6	REEP6	-0.935847332	-0.050284682	0.349351797	0.021232472	0.067767846	0.012205143	0.019072034	15	17	17
ENSG00000164164.11	OTUD4	-0.935559571	-0.669192198	0.349499999	0.000127221	0.117053319	0.000843623	0.002317626	1	1	1
ENSG00000130584.6	ZBTB46	-0.934142704	-0.018812379	0.350230286	0.142515843	0.265626597	1.46E-07	1.50E-06	43	58	58
ENSG00000038210.9	PI4K2B	-0.934064224	-0.012416543	0.350270765	0.266901639	0.162115736	6.92E-05	0.000296717	50	56	56
ENSG00000117020.12	AKT3	0.9329192	0.025594923	0.350861688	0.076736898	0.073586604	0.008907614	0.014976642	23	27	27
ENSG00000197497.6	ZNF665	-0.932871176	-0.027014396	0.350886486	0.078123766	0.055258077	0.024096045	0.031951754	34	46	46
ENSG00000168685.10	IL7R	-0.932856718	-0.029901873	0.350893952	0.056907137	0.096596671	0.00256655	0.005629222	18	19	19
ENSG00000167702.7	KIFC2	0.932799483	0.020543445	0.350923508	0.265342545	0.256420118	2.61E-07	2.49E-06	33	54	54
ENSG00000164011.13	ZNF691	-0.932179333	-0.01280781	0.351243854	0.313160811	0.189402529	1.45E-05	8.19E-05	67	81	81
ENSG00000088854.11	C20orf194	0.93211772	0.294863855	0.351275691	0.00072807	0.083853546	0.00511375	0.009701114	2	2	2
ENSG00000163394.5	CCKAR	0.931488094	0.009109243	0.351601141	0.656625084	0.129702961	0.000421498	0.001345494	104	123	123
ENSG00000162843.13	WDR64	-0.931481376	-0.017651716	0.351604614	0.186461391	0.240769316	6.85E-07	5.79E-06	33	34	34
ENSG00000175183.5	CSRP2	0.931249536	0.022820039	0.351724499	0.06520466	0.054574482	0.025013307	0.032775325	24	24	24
ENSG00000139910.15	NOVA1	0.930875734	0.01117336	0.351917848	0.309517493	0.141587455	0.000218467	0.000769342	71	82	82
ENSG00000139675.10	HNRNPA1L2	0.930679378	0.014937095	0.35201944	0.236183412	0.249197086	4.08E-07	3.64E-06	41	47	47
ENSG00000141404.11	GNAL	0.92990946	0.167675833	0.352417965	0.002370381	0.061696647	0.016966896	0.02451941	6	6	6
ENSG00000103356.11	EARS2	0.929054916	0.020624717	0.352860627	0.12990167	0.149649102	0.00013943	0.000530948	23	27	27
ENSG00000118263.10	KLF7	0.928371109	0.016536789	0.3532151	0.177669266	0.13918995	0.000249549	0.000862173	51	60	60
ENSG00000172803.13	SNX32	0.928129927	0.01049681	0.353340177	0.353337748	0.373741918	9.63E-11	2.48E-09	25	36	36
ENSG00000167941.2	SOST	-0.928016142	-0.017709366	0.353399196	0.136334631	0.143158169	0.000200208	0.000718201	40	43	43
ENSG00000125885.9	MCM8	0.927025362	0.023214137	0.353913367	0.076083329	0.16457389	6.02E-05	0.000268305	34	38	38
ENSG00000255423.1	EBLN2	0.925626237	0.021654699	0.354640253	0.124582381	0.056677044	0.022299783	0.030138952	27	27	27
ENSG00000162836.7	ACP6	-0.925155512	-0.011875739	0.354885021	0.336800837	0.538581396	8.68E-17	1.06E-14	15	19	19
ENSG00000149483.7	TMEM138	-0.924910976	-0.01069693	0.355012217	0.412671424	0.154727915	0.000104919	0.000422433	75	91	91
ENSG00000150961.10	SEC24D	0.923303015	0.040885854	0.355849317	0.032471404	0.134865129	0.000317042	0.001062191	7	12	12
ENSG00000143971.7	ETAA1	-0.923235273	-0.017799274	0.355884611	0.180071658	0.116426295	0.000873028	0.002373914	37	41	41
ENSG00000013392.6	RWDD2A	0.921818441	0.013939965	0.356623287	0.248875927	0.068451807	0.011761201	0.018544964	83	102	102
ENSG00000236624.4	CCDC163P	-0.920709817	-0.010621458	0.357201949	0.433659258	0.509574681	1.38E-15	1.10E-13	59	70	70
ENSG00000078142.7	PIK3C3	0.920673224	0.01641443	0.35722106	0.212124199	0.068237295	0.011898657	0.018713223	63	71	71
ENSG00000108679.8	LGALS3BP	-0.919373989	-0.067025543	0.35789999	0.011942937	0.099118442	0.002238702	0.005049663	1	1	1
ENSG00000109794.9	FAM149A	-0.919224939	-0.031741323	0.357977929	0.045682453	0.098195271	0.002353585	0.005279446	10	10	10
ENSG00000149451.13	ADAM33	-0.91864308	-0.015322611	0.358282291	0.24667163	0.305118174	1.14E-08	1.51E-07	57	68	68
ENSG00000174453.5	VWC2L	0.916828447	0.016458802	0.359232544	0.213950112	0.081696358	0.00574609	0.010592122	69	82	82
ENSG00000151067.16	CACNA1C	0.915535195	0.020646239	0.359910735	0.076699108	0.05360559	0.026374713	0.033962087	39	45	45
ENSG00000124207.12	CSE1L	0.915223673	0.109756423	0.360074219	0.003265798	0.057903279	0.020857406	0.02866783	3	3	3
ENSG00000164978.13	NUDT2	0.914797675	0.014784398	0.360297856	0.215478226	0.255730049	2.72E-07	2.58E-06	42	48	48
ENSG00000111247.10	RAD51AP1	-0.914689568	-0.011227245	0.360354622	0.357923861	0.083647207	0.005171098	0.009774365	91	99	99
ENSG00000198945.3	L3MBTL3	0.914575761	0.010321356	0.360414388	0.366263223	0.208045609	4.89E-06	3.24E-05	62	68	68
ENSG00000169221.9	TBC1D10B	0.914521234	0.020729607	0.360443026	0.110243163	0.053381216	0.026700618	0.034260941	25	29	29
ENSG00000104863.7	LIN7B	-0.914252379	-0.044724869	0.360584247	0.024714787	0.104692743	0.001654299	0.003966678	9	9	9
ENSG00000112685.9	EXOC2	0.912916304	0.020092403	0.361286562	0.135767676	0.101139138	0.002006324	0.00463721	31	35	35
ENSG00000182831.7	C16orf72	-0.911686059	-0.238943135	0.361934005	0.000624867	0.0794637	0.006482996	0.011628157	5	6	6
ENSG00000143502.10	SUSD4	0.910106913	0.038589235	0.362766129	0.031972504	0.127667232	0.000471467	0.001474082	10	14	14
ENSG00000253485.1	PCDHGA5	0.909849934	0.23463615	0.362901657	0.00085989	0.078950469	0.006665343	0.011867785	2	2	2
ENSG00000008838.13	MED24	0.909821325	0.025670507	0.362916747	0.071828096	0.125263864	0.000538038	0.001645591	16	16	16
ENSG00000171109.14	MFN1	0.909813693	0.032967193	0.362920772	0.043639573	0.16506499	5.86E-05	0.000261589	6	6	6
ENSG00000242110.3	AMACR	-0.909639198	-0.011652264	0.36301282	0.356126512	0.568099425	4.32E-18	7.51E-16	23	25	25
ENSG00000148300.7	REXO4	-0.909084295	-0.013497169	0.363305632	0.279211293	0.131800455	0.000375486	0.00122212	49	52	52
ENSG00000115840.9	SLC25A12	-0.90769566	-0.047293247	0.364039037	0.021791162	0.177865939	2.83E-05	0.000142015	18	22	22
ENSG00000149922.6	TBX6	0.907223331	0.032978266	0.364288708	0.041556511	0.100297445	0.002100053	0.004811215	5	5	5
ENSG00000127463.9	EMC1	0.907098891	0.018872272	0.364354504	0.130694712	0.239011566	7.63E-07	6.33E-06	26	27	27
ENSG00000186792.11	HYAL3	0.90672915	0.023288816	0.364550044	0.0820756	0.156243587	9.64E-05	0.00039494	4	5	5
ENSG00000122971.4	ACADS	0.906445374	0.02514097	0.364700166	0.070243861	0.153566884	0.000111978	0.000445452	10	11	11
ENSG00000136457.5	CHAD	0.904181685	0.022233276	0.36589907	0.101114631	0.19551294	1.02E-05	6.06E-05	15	16	16
ENSG00000204909.3	SPINK9	0.903485379	0.032287948	0.366268345	0.051795768	0.215776221	3.09E-06	2.20E-05	18	26	26
ENSG00000185774.10	KCNIP4	0.902888281	0.012181881	0.366585191	0.334294281	0.458458122	1.26E-13	5.76E-12	107	116	116
ENSG00000139117.9	CPNE8	0.902736255	0.045537651	0.36666589	0.022050979	0.087647712	0.004165483	0.008253235	21	27	27
ENSG00000108561.4	C1QBP	-0.899619702	-0.030639679	0.368322669	0.071001691	0.059232758	0.019400301	0.027123652	29	31	31
ENSG00000203697.7	CAPN8	0.899276239	0.020418217	0.36850554	0.141835972	0.100931412	0.002029062	0.004674971	32	37	37
ENSG00000109066.9	TMEM104	0.897410333	0.341909473	0.369500001	0.000605319	0.085694751	0.004629333	0.008978028	1	1	1
ENSG00000141084.6	RANBP10	-0.897228574	-0.016418867	0.369596961	0.174911705	0.081446061	0.005824346	0.010704396	30	39	39
ENSG00000103742.7	IGDCC4	-0.896165572	-0.123911994	0.37016434	0.002265769	0.066150415	0.013323342	0.020451803	13	14	14
ENSG00000171612.6	SLC25A33	0.894997775	0.013493533	0.370788278	0.230316303	0.086288874	0.004483016	0.008746652	50	60	60
ENSG00000196355.2	AC021860.1	0.89477165	0.014605211	0.370909168	0.250559588	0.331865377	1.87E-09	3.20E-08	34	39	39
ENSG00000179057.9	IGSF22	0.894707666	0.018496152	0.37094338	0.126617434	0.127628568	0.000472471	0.001475956	41	42	42
ENSG00000133116.6	KL	-0.894706242	-0.251656563	0.370944141	0.000737668	0.101635557	0.001953004	0.004551421	3	3	3
ENSG00000115041.8	KCNIP3	0.893821378	0.02259787	0.371417469	0.100450732	0.1012218	0.001997346	0.004625241	12	19	19
ENSG00000203722.3	RAET1G	0.893247413	0.033491452	0.371724692	0.050759001	0.098635651	0.00229807	0.005170797	20	23	23
ENSG00000163898.5	LIPH	-0.892933859	-0.008047286	0.371892593	0.606946028	0.153676474	0.000111292	0.000444176	99	110	110
ENSG00000133059.12	DSTYK	-0.89237428	-0.047878302	0.372192352	0.020707063	0.067533811	0.012360893	0.019212178	9	10	10
ENSG00000106605.6	BLVRA	0.891365165	0.017668712	0.3727333	0.084503737	0.118131771	0.000795324	0.002206992	47	51	51
ENSG00000152208.7	GRID2	0.891075004	0.021793536	0.372888934	0.091641347	0.045640219	0.040876959	0.047479802	32	35	35
ENSG00000135835.6	KIAA1614	-0.891004765	-0.019194262	0.372926614	0.113434533	0.124172345	0.000571263	0.001722682	36	38	38
ENSG00000198270.8	TMEM116	-0.89058143	-0.02019722	0.373153765	0.105763258	0.173750143	3.58E-05	0.000172788	43	51	51
ENSG00000013288.4	MAN2B2	-0.889683542	-0.024180931	0.373635834	0.099949204	0.104087131	0.001709627	0.004077923	27	29	29
ENSG00000177082.8	WDR73	0.889290646	0.022954334	0.373846897	0.08471377	0.220330097	2.36E-06	1.72E-05	13	16	16
ENSG00000135469.9	COQ10A	0.887890295	0.464254562	0.374599766	0.000192483	0.092702006	0.003169073	0.006616912	4	4	4
ENSG00000205138.2	SDHAF1	0.886798318	0.018749978	0.375187493	0.084148331	0.074750234	0.00836435	0.01422699	27	33	33
ENSG00000176293.15	ZNF135	-0.886734925	-0.015367175	0.375221631	0.141262092	0.146556252	0.0001657	0.000614328	26	35	35
ENSG00000163428.3	LRRC58	0.886704153	0.015151693	0.375238202	0.19752794	0.084396814	0.004965777	0.009464651	63	74	74
ENSG00000125734.9	GPR108	-0.886034869	-0.011601215	0.375598738	0.333425438	0.500406035	3.21E-15	2.45E-13	18	21	21
ENSG00000122779.12	TRIM24	-0.885700098	-0.015430109	0.375779155	0.192729989	0.078059353	0.006994229	0.012339069	50	54	54
ENSG00000103254.5	FAM173A	0.885430172	0.165101677	0.375924665	0.001717966	0.054312746	0.025373857	0.033046186	3	3	3
ENSG00000174007.7	CEP19	-0.884735582	-0.015862114	0.37629926	0.160804091	0.260848285	1.98E-07	1.94E-06	33	44	44
ENSG00000146409.6	SLC18B1	-0.884124442	-0.018785995	0.37662904	0.306997875	0.088226198	0.004037208	0.00804764	78	91	91
ENSG00000188234.9	AGAP4	0.884019256	0.031251381	0.376685818	0.046885455	0.17472668	3.38E-05	0.000164072	18	24	24
ENSG00000244731.3	C4A	-0.883975164	-0.041657758	0.37670962	0.022951574	0.078659429	0.006771019	0.012009102	18	32	32
ENSG00000103160.7	HSDL1	-0.883280035	-0.221294708	0.377084988	0.000978948	0.047461154	0.036964442	0.043799019	4	4	4
ENSG00000152778.7	IFIT5	0.883043971	0.026917682	0.377212514	0.050188753	0.051780151	0.029148726	0.036617391	12	13	13
ENSG00000099330.4	OCEL1	0.882328188	0.015126855	0.377599357	0.212041581	0.108609827	0.001336952	0.003350959	44	53	53
ENSG00000162383.7	SLC1A7	-0.881944663	-0.013246424	0.377806733	0.235950414	0.390889217	2.70E-11	8.03E-10	20	22	22
ENSG00000130653.11	PNPLA7	-0.881562977	-0.025329173	0.378013184	0.096544196	0.067832827	0.012162249	0.019037593	21	28	28
ENSG00000115275.7	MOGS	-0.881299943	-0.013669595	0.378155497	0.236584195	0.144408195	0.00018676	0.000676118	42	48	48
ENSG00000185420.14	SMYD3	0.880992719	0.03449854	0.378321761	0.050436067	0.048309139	0.035275994	0.042348001	24	29	29
ENSG00000257704.2	PRR24	-0.880838923	-0.041752773	0.378405009	0.023624488	0.044593146	0.043317666	0.049518184	8	9	9
ENSG00000204038.3	AL359195.1	-0.880529537	-0.069176006	0.378572511	0.01200838	0.055013708	0.024419944	0.032240766	2	2	2
ENSG00000058404.15	CAMK2B	0.878980473	0.051483551	0.379411864	0.013749564	0.060402789	0.018203521	0.025896579	6	8	8
ENSG00000164972.8	C9orf24	-0.878817398	-0.01411154	0.379500291	0.221306317	0.190978402	1.33E-05	7.57E-05	58	72	72
ENSG00000124214.15	STAU1	-0.877996231	-0.017031413	0.379945764	0.171449734	0.093188045	0.003086797	0.006478459	70	73	73
ENSG00000100249.4	C22orf31	-0.877711217	-0.014781008	0.380100455	0.184784588	0.091490256	0.003383831	0.006973613	36	40	40
ENSG00000110799.9	VWF	-0.87760421	-0.010559988	0.380158544	0.292184576	0.178847674	2.67E-05	0.000135553	69	79	79
ENSG00000138028.10	CGREF1	0.875867268	0.023620849	0.381102195	0.081278747	0.064428474	0.014627651	0.022018953	31	33	33
ENSG00000112378.11	PERP	0.875835246	0.030078073	0.381119606	0.044068007	0.052090367	0.028657098	0.036224094	8	8	8
ENSG00000158014.10	SLC30A2	0.875348153	0.01278789	0.381384501	0.236240638	0.078562054	0.006806748	0.012060757	58	62	62
ENSG00000183166.6	CALN1	0.872937574	0.02258234	0.382697104	0.106842282	0.072177521	0.009613116	0.015884911	40	52	52
ENSG00000181019.8	NQO1	-0.872746945	-0.015368297	0.382801024	0.177543669	0.102002259	0.001914523	0.004471052	37	47	47
ENSG00000040531.10	CTNS	0.872602779	0.012356771	0.382879625	0.191478158	0.256022659	2.67E-07	2.54E-06	29	38	38
ENSG00000188559.9	RALGAPA2	-0.872534301	-0.019301747	0.382916964	0.095248209	0.051972558	0.028842796	0.036308013	34	36	36
ENSG00000142669.9	SH3BGRL3	0.872461113	0.021855547	0.382956874	0.080673838	0.119304763	0.000745894	0.002096304	17	19	19
ENSG00000198015.8	MRPL42	0.871825631	0.015815512	0.38330351	0.138607051	0.080365333	0.00617466	0.011173899	35	38	38
ENSG00000169508.6	GPR183	-0.871803054	-0.039837452	0.383315829	0.04075999	0.064758952	0.014367701	0.021708184	14	16	16
ENSG00000243244.1	STON1	0.870664	0.0272613	0.38393764	0.052987867	0.11401137	0.000996069	0.002633957	10	10	10
ENSG00000070476.10	ZXDC	0.870403488	0.022920663	0.384079941	0.080955777	0.106373205	0.001509908	0.003700643	12	14	14
ENSG00000203827.7	NBPF16	0.869755947	0.054144152	0.38443379	0.022551851	0.08976544	0.003714753	0.007519801	6	39	39
ENSG00000114021.7	NIT2	0.868364706	0.009706473	0.38519471	0.422609522	0.492517189	6.56E-15	4.69E-13	40	45	45
ENSG00000183098.6	GPC6	0.867573529	0.055721717	0.385627843	0.013700715	0.047322805	0.037247695	0.044062567	4	4	4
ENSG00000113273.11	ARSB	-0.866562986	-0.013034878	0.386181501	0.36605031	0.280920061	5.53E-08	6.31E-07	78	90	90
ENSG00000117118.5	SDHB	0.865955422	0.008504941	0.386514608	0.577953991	0.091461223	0.003389151	0.006980636	94	129	129
ENSG00000205863.5	C1QTNF9B	0.865206001	0.016862932	0.386925732	0.101009359	0.108298567	0.00135979	0.003391245	34	35	35
ENSG00000196678.9	ERI2	-0.864472815	-0.036134045	0.387328208	0.089837894	0.048973824	0.034008023	0.041109625	20	31	31
ENSG00000054803.3	CBLN4	0.863332041	0.028736927	0.387954932	0.054469378	0.087638904	0.004167468	0.008253235	10	11	11
ENSG00000124541.6	RRP36	-0.862924903	-0.023023146	0.388178757	0.10117379	0.077953234	0.007034462	0.012398068	21	24	24
ENSG00000170231.11	FABP6	-0.862888053	-0.014865565	0.38819902	0.215497251	0.05753677	0.0212783	0.029103051	70	78	78
ENSG00000157303.6	SUSD3	0.862098469	0.017556586	0.388633334	0.162677981	0.060543103	0.018065115	0.025759891	39	43	43
ENSG00000134815.14	DHX34	-0.861938765	-0.026037959	0.388721216	0.06842085	0.095542686	0.002717337	0.005848578	16	17	17
ENSG00000111275.8	ALDH2	0.861933772	0.012976155	0.388723963	0.173340932	0.063355079	0.015505203	0.022964591	44	51	51
ENSG00000163421.4	PROK2	0.861646691	0.015837975	0.388881969	0.141351985	0.086483581	0.004436076	0.008690923	36	39	39
ENSG00000105186.10	ANKRD27	0.860767092	0.020686667	0.389366333	0.107830959	0.358520408	2.89E-10	6.65E-09	21	25	25
ENSG00000181322.9	NME9	-0.85937074	-0.027590132	0.390136008	0.079142754	0.139900923	0.000239903	0.000835166	10	10	10
ENSG00000157259.6	GATAD1	0.859153781	0.02782788	0.390255679	0.052525018	0.087180672	0.004272006	0.00841463	15	18	18
ENSG00000166257.4	SCN3B	-0.859080176	-0.033651153	0.390296283	0.040711024	0.045074338	0.042177862	0.048636583	25	31	31
ENSG00000181754.6	AMIGO1	-0.858944737	-0.017870512	0.390371006	0.135835889	0.067879926	0.012131255	0.01902169	31	33	33
ENSG00000156171.10	DRAM2	-0.858254285	-0.014654935	0.390752066	0.192813828	0.309442341	8.56E-09	1.17E-07	20	21	21
ENSG00000138472.6	GUCA1C	0.857901228	0.01608682	0.390947006	0.155872932	0.150354963	0.000134036	0.000515786	38	43	43
ENSG00000124831.14	LRRFIP1	0.85788236	0.015339039	0.390957426	0.192156795	0.172743665	3.79E-05	0.000180841	47	50	50
ENSG00000101391.16	CDK5RAP1	0.85786011	0.02152895	0.390969713	0.120389685	0.052173882	0.028526199	0.036108625	47	56	56
ENSG00000187715.9	KBTBD12	-0.857579319	-0.015190395	0.391124799	0.215553805	0.260140668	2.07E-07	2.01E-06	61	65	65
ENSG00000130701.3	RBBP8NL	0.857563429	0.027003972	0.391133576	0.058974936	0.146103099	0.000169939	0.000625595	6	6	6
ENSG00000213639.5	PPP1CB	0.857003616	0.008630222	0.391442886	0.592728597	0.346570691	6.75E-10	1.33E-08	90	103	103
ENSG00000110074.6	FOXRED1	0.856529296	0.029255276	0.391705075	0.041854104	0.063155439	0.015674194	0.02311785	17	20	20
ENSG00000118418.10	HMGN3	-0.856506551	-0.154664008	0.391717651	0.001485699	0.062593848	0.01615962	0.023661788	4	4	4
ENSG00000118242.11	MREG	-0.856466136	-0.01192526	0.391739997	0.458678288	0.064138711	0.014859481	0.022294408	100	110	110
ENSG00000196653.7	ZNF502	-0.855311153	-0.022122941	0.392378915	0.081128604	0.105764484	0.001560707	0.003802179	16	17	17
ENSG00000085491.11	SLC25A24	0.854877998	0.019058371	0.392618692	0.108179429	0.280700468	5.61E-08	6.38E-07	12	14	14
ENSG00000144218.14	AFF3	0.854270064	0.02101422	0.39295537	0.076989541	0.137905927	0.000267951	0.000918795	23	26	26
ENSG00000067704.8	IARS2	-0.853447837	-0.036779041	0.393411003	0.027813785	0.044647469	0.043187414	0.049409127	13	13	13
ENSG00000113594.5	LIFR	0.85318016	0.011098408	0.393559404	0.313931522	0.13569338	0.000302853	0.001021212	95	102	102
ENSG00000136147.12	PHF11	0.852913041	0.014046083	0.393707529	0.238798961	0.153017143	0.000115481	0.000456407	56	63	63
ENSG00000203791.9	METTL10	-0.852854915	-0.016434529	0.393739766	0.168223908	0.078902304	0.006682716	0.011887128	62	71	71
ENSG00000182600.5	C2orf82	0.850810285	0.016135228	0.394874747	0.134486278	0.321448686	3.82E-09	5.81E-08	18	19	19
ENSG00000143314.8	MRPL24	-0.850077546	-0.015424132	0.395281975	0.183365661	0.113626241	0.00101722	0.002678251	48	55	55
ENSG00000050555.13	LAMC3	0.849447171	0.013497944	0.395632515	0.215403955	0.0717185	0.009854852	0.016159557	40	45	45
ENSG00000120333.4	MRPS14	-0.84828732	-0.021677043	0.396277978	0.076753796	0.058280921	0.020432565	0.028285311	26	32	32
ENSG00000097033.10	SH3GLB1	-0.848105264	-0.027957138	0.39637935	0.051386029	0.142971653	0.000202294	0.000723554	9	11	11
ENSG00000198838.7	RYR3	-0.84807471	-0.013718239	0.396396365	0.310551378	0.094561528	0.002865613	0.006095125	104	116	116
ENSG00000115526.6	CHST10	0.846276946	0.042008049	0.397398265	0.024018992	0.055004045	0.024432843	0.032246138	10	12	12
ENSG00000186866.12	POFUT2	0.845719564	0.035587243	0.397709207	0.037667866	0.099307205	0.002215907	0.005009022	13	16	16
ENSG00000198848.8	CES1	0.845360669	0.027194015	0.397909497	0.062642924	0.129883831	0.00041732	0.001334653	17	23	23
ENSG00000104979.4	C19orf53	0.845310505	0.028756708	0.397937497	0.056156121	0.082017819	0.005647125	0.010441746	26	28	28
ENSG00000162585.12	C1orf86	-0.844661236	-0.060300178	0.398300009	0.01091015	0.045155569	0.041988525	0.048477955	1	1	1
ENSG00000138771.10	SHROOM3	0.844152875	0.023445424	0.398583984	0.079231601	0.065241805	0.013996252	0.02127902	33	39	39
ENSG00000132823.6	OSER1	-0.843663915	-0.020066979	0.398857238	0.099140651	0.070723724	0.01039991	0.016782547	32	33	33
ENSG00000093183.9	SEC22C	0.84257051	0.013718535	0.39946869	0.130823593	0.068332559	0.011837415	0.018624927	34	44	44
ENSG00000024048.6	UBR2	-0.84235778	-0.0139678	0.399587718	0.414294876	0.07337343	0.009010912	0.015122469	71	83	83
ENSG00000169245.4	CXCL10	-0.841744883	-0.018752264	0.39993077	0.139505246	0.070788457	0.010363537	0.016749411	57	74	74
ENSG00000132702.8	HAPLN2	0.841718568	0.010181058	0.399945503	0.36613666	0.06572935	0.013631024	0.020831755	67	75	75
ENSG00000197134.7	ZNF257	0.840567947	0.005365491	0.400590022	0.217693609	0.07172085	0.009853599	0.016159557	49	62	62
ENSG00000105963.9	ADAP1	-0.839771465	-0.036837315	0.401036536	0.043101349	0.088325254	0.004015641	0.008017483	9	11	11
ENSG00000140497.12	SCAMP2	0.839360342	0.025729422	0.401267131	0.078513919	0.120857538	0.000685109	0.001973119	19	27	27
ENSG00000237541.3	HLA-DQA2	-0.838499469	-0.018335084	0.401750246	0.077753751	0.351245898	4.85E-10	1.02E-08	44	96	96
ENSG00000088002.7	SULT2B1	-0.837795748	-0.01223066	0.402145427	0.310913266	0.44945227	2.68E-13	1.19E-11	29	36	36
ENSG00000123810.3	B9D2	-0.836494924	-0.025471848	0.402876531	0.070066592	0.07448454	0.00848539	0.014384686	29	35	35
ENSG00000258484.3	SPESP1	0.835742116	0.120255313	0.403299997	0.002176655	0.048854545	0.034232069	0.041353081	1	1	1
ENSG00000116030.12	SUMO1	-0.835564435	-0.519498649	0.403399984	0.000122588	0.091857031	0.003317341	0.006859814	1	1	1
ENSG00000173894.6	CBX2	-0.834997547	-0.015657557	0.403719089	0.254072112	0.087452895	0.004209592	0.008318612	51	59	59
ENSG00000109103.7	UNC119	0.834578995	0.023756938	0.403954793	0.078095771	0.159713184	7.93E-05	0.000331223	14	16	16
ENSG00000115604.6	IL18R1	0.834191468	0.025865412	0.404173098	0.065292704	0.196660325	9.54E-06	5.73E-05	12	13	13
ENSG00000167220.7	HDHD2	-0.833702108	-0.013249236	0.40444887	0.17100355	0.051924968	0.028918157	0.036377801	47	57	57
ENSG00000110851.7	PRDM4	0.83131332	0.017215649	0.405796652	0.123442968	0.090276887	0.003613399	0.007351303	36	38	38
ENSG00000103852.8	TTC23	0.831184188	0.01618117	0.405869586	0.17156453	0.255482791	2.76E-07	2.61E-06	35	37	37
ENSG00000198901.9	PRC1	0.830088892	0.02280313	0.406488527	0.079517584	0.105638937	0.001571393	0.003820566	28	33	33
ENSG00000196648.6	GOLGA6L9	0.829871506	0.02140036	0.406611437	0.098084364	0.114689446	0.000959884	0.002554921	23	25	25
ENSG00000023228.9	NDUFS1	0.829622203	0.02263502	0.40675242	0.082350236	0.254753598	2.89E-07	2.70E-06	21	24	24
ENSG00000180953.7	ST20	-0.829553085	-0.016307243	0.406791511	0.157723807	0.156052525	9.74E-05	0.000397041	36	37	37
ENSG00000186364.7	NUDT17	-0.829343692	-0.057807709	0.406909954	0.011105428	0.048356309	0.035184432	0.042251972	13	17	17
ENSG00000130669.13	PAK4	-0.828360449	-0.016646037	0.407466398	0.057134788	0.218906728	2.57E-06	1.85E-05	34	40	40
ENSG00000173110.6	HSPA6	0.827866274	0.012478328	0.407746237	0.247343779	0.054505264	0.025108146	0.032844287	74	93	93
ENSG00000244482.5	LILRA6	-0.826959116	-0.054599596	0.408260235	0.012363914	0.047250408	0.037396809	0.04416802	34	40	40
ENSG00000185015.3	CA13	-0.825650098	-0.015123207	0.409002608	0.263555592	0.242711511	6.08E-07	5.23E-06	42	49	49
ENSG00000118322.8	ATP10B	-0.825493794	-0.025006821	0.409091305	0.064107107	0.135238872	0.000310559	0.001042387	15	17	17
ENSG00000135048.9	TMEM2	-0.824270531	-0.022084719	0.409785859	0.168030183	0.133557411	0.000340791	0.001129327	45	53	53
ENSG00000113734.13	BNIP1	0.823158118	0.01850947	0.410418082	0.169941796	0.205308866	5.75E-06	3.72E-05	48	50	50
ENSG00000177595.13	PIDD	-0.822939426	-0.008816528	0.410542441	0.157485928	0.067794397	0.012187598	0.01905925	48	71	71
ENSG00000104687.8	GSR	-0.822923409	-0.025390772	0.41055155	0.063265861	0.133871525	0.000334931	0.001113951	11	11	11
ENSG00000092020.6	PPP2R3C	0.822832621	0.018117213	0.410603183	0.126571987	0.154225966	0.000107915	0.000431642	22	25	25
ENSG00000185262.7	UBALD2	-0.822416804	-0.028955392	0.410839719	0.048833669	0.136941242	0.000282651	0.000962873	17	19	19
ENSG00000167716.14	WDR81	-0.822365743	-0.012317815	0.41086877	0.226487934	0.04658137	0.038804208	0.045503187	48	61	61
ENSG00000122025.10	FLT3	0.819253857	0.016217267	0.412641593	0.160996285	0.336366743	1.37E-09	2.42E-08	25	29	29
ENSG00000111321.6	LTBR	-0.818342683	-0.012801466	0.41316154	0.177651273	0.287122028	3.71E-08	4.40E-07	22	30	30
ENSG00000187553.5	CYP26C1	-0.817997863	-0.027522419	0.413358408	0.059198918	0.060731868	0.017880597	0.025546654	16	18	18
ENSG00000166928.6	MS4A14	-0.817589888	-0.022992072	0.413591404	0.073937463	0.090392011	0.003590967	0.007321983	19	19	19
ENSG00000153266.8	FEZF2	0.817560272	0.007241761	0.41360832	0.5150778	0.113937899	0.00100007	0.002640713	90	98	98
ENSG00000138606.15	SHF	-0.817506384	-0.014618906	0.413639103	0.205663758	0.063942626	0.015018464	0.022449926	43	52	52
ENSG00000197142.6	ACSL5	-0.816810633	-0.015578836	0.414036655	0.188749008	0.054894197	0.024579961	0.03237011	62	68	68
ENSG00000119673.10	ACOT2	0.816396938	0.01411879	0.414273147	0.166767444	0.197469209	9.10E-06	5.51E-05	29	34	34
ENSG00000154309.7	DISP1	0.815465367	0.010298336	0.414805981	0.30064454	0.098272411	0.002343765	0.00526065	73	98	98
ENSG00000166546.9	BEAN1	-0.814715292	-0.014825877	0.415235298	0.16697007	0.077684591	0.007137353	0.01251899	60	66	66
ENSG00000178567.5	EPM2AIP1	-0.813944282	-0.046519319	0.415676871	0.023952917	0.055538835	0.023729309	0.031580126	12	13	13
ENSG00000167644.7	C19orf33	0.813427532	0.012125619	0.415972979	0.30603836	0.312660455	6.90E-09	9.58E-08	41	55	55
ENSG00000254656.1	RTL1	-0.813212603	-0.01332316	0.416096175	0.208449637	0.054077304	0.025702711	0.033381894	57	62	62
ENSG00000181577.11	C6orf223	0.813031495	0.492559866	0.416200001	0.00016694	0.051719534	0.029245793	0.036718105	1	1	1
ENSG00000170430.9	MGMT	-0.812820309	-0.014085542	0.41632109	0.185938116	0.2571079	2.50E-07	2.39E-06	39	42	42
ENSG00000142765.13	SYTL1	-0.812508894	-0.019844891	0.416499685	0.076957952	0.120097582	0.00071422	0.002034496	27	37	37
ENSG00000161036.6	LRWD1	0.812100443	0.031470252	0.416733999	0.027195932	0.100847993	0.002038265	0.004688106	11	12	12
ENSG00000121060.10	TRIM25	0.811974841	0.033093564	0.416806068	0.033204454	0.138095905	0.000265146	0.000910888	12	14	14
ENSG00000157542.8	KCNJ6	0.811004701	0.017638157	0.417362971	0.141920301	0.20504435	5.84E-06	3.77E-05	16	22	22
ENSG00000161798.6	AQP5	0.810622612	0.028934524	0.417582427	0.103158267	0.156013023	9.76E-05	0.000397412	13	15	15
ENSG00000160161.5	CILP2	0.809193181	0.032849795	0.418404037	0.033121252	0.063501582	0.015382364	0.022862873	17	21	21
ENSG00000088280.14	ASAP3	-0.808793516	-0.039542834	0.418633926	0.032236361	0.134017807	0.000332236	0.001105995	31	35	35
ENSG00000100365.10	NCF4	-0.808678687	-0.485775511	0.418699991	0.000164065	0.052745074	0.027647141	0.035227912	1	1	1
ENSG00000100503.19	NIN	0.806789819	0.026978723	0.419787586	0.044756806	0.089256173	0.003818492	0.007689976	10	13	13
ENSG00000125630.11	POLR1B	0.806339001	0.02066107	0.420047408	0.102782577	0.200344458	7.69E-06	4.78E-05	13	14	14
ENSG00000171202.2	TMEM126A	-0.805754789	-0.024848247	0.420384251	0.05129584	0.082117472	0.005616793	0.010396189	23	27	27
ENSG00000129103.13	SUMF2	-0.805447235	-0.013767728	0.420561643	0.157617641	0.110012287	0.001238679	0.003145668	44	57	57
ENSG00000242173.4	ARHGDIG	0.803763438	0.020908503	0.421533609	0.06946713	0.063352473	0.015507398	0.022964591	12	16	16
ENSG00000146830.9	GIGYF1	0.803450115	0.016129315	0.421714619	0.106599021	0.07592453	0.007849789	0.01351544	30	35	35
ENSG00000141738.9	GRB7	0.802943873	0.010900928	0.422007177	0.301868342	0.13952128	0.000245007	0.000848889	62	74	74
ENSG00000166788.5	SAAL1	0.802465851	0.022324799	0.422283534	0.075757005	0.214499742	3.34E-06	2.35E-05	22	24	24
ENSG00000218739.5	AC007390.5	0.802388818	0.017546598	0.42232808	0.121628958	0.263700014	1.65E-07	1.66E-06	16	18	18
ENSG00000167842.11	MIS12	-0.799838515	-0.025241941	0.423804365	0.066021232	0.099699023	0.002169326	0.004929714	16	18	18
ENSG00000131435.8	PDLIM4	0.799086962	0.030752598	0.424239989	0.035216899	0.08252493	0.005494457	0.01023606	8	9	9
ENSG00000187068.2	C3orf70	-0.797559685	-0.020411855	0.425126054	0.11148391	0.066745828	0.012900173	0.019919446	54	57	57
ENSG00000213079.5	SCAF8	-0.797181455	-0.010925971	0.425345655	0.278026737	0.059271558	0.019359364	0.027089976	51	58	58
ENSG00000145882.6	PCYOX1L	-0.796940547	-0.00918257	0.425485561	0.411919968	0.077152206	0.007345732	0.012813289	107	116	116
ENSG00000129028.4	THAP10	-0.795998655	-0.015423958	0.426032817	0.175417231	0.052933245	0.027363645	0.034915413	52	56	56
ENSG00000123908.7	AGO2	0.794903255	0.010813266	0.426669781	0.3360657	0.126936636	0.000490793	0.001520188	85	100	100
ENSG00000086619.9	ERO1LB	-0.794804968	-0.007843078	0.426726961	0.437641954	0.122775985	0.00061674	0.001825154	104	117	117
ENSG00000106853.12	PTGR1	0.794494792	0.011198006	0.42690744	0.214528283	0.171481683	4.07E-05	0.000193058	60	65	65
ENSG00000067113.12	PPAP2A	-0.794351862	-0.184475832	0.42699062	0.001101564	0.160662388	7.51E-05	0.000317234	2	2	2
ENSG00000267206.1	LCN6	-0.793933273	-0.037352877	0.427234278	0.040511061	0.058565749	0.020117957	0.027945131	13	22	22
ENSG00000168754.9	FAM178B	-0.793712037	-0.038973098	0.427363091	0.026509786	0.076175588	0.007743965	0.013377387	9	16	16
ENSG00000136868.9	SLC31A1	-0.793614043	-0.01617635	0.427420155	0.135597307	0.056933688	0.021989738	0.029797111	45	48	48
ENSG00000126773.8	PCNXL4	-0.79258521	-0.019221164	0.428019529	0.124173122	0.138387091	0.000260904	0.00089885	11	11	11
ENSG00000114268.7	PFKFB4	-0.792429042	-0.028526617	0.428110551	0.035517759	0.079753623	0.006382205	0.011475555	7	10	10
ENSG00000112118.13	MCM3	0.792257426	0.031081101	0.42821059	0.050969544	0.08149795	0.005808036	0.010685175	12	13	13
ENSG00000115602.12	IL1RL1	0.792116937	0.022076168	0.428292496	0.080695302	0.208264749	4.83E-06	3.22E-05	31	34	34
ENSG00000058272.11	PPP1R12A	0.792071176	0.026652628	0.428319176	0.045574903	0.062344317	0.016380159	0.023879459	6	9	9
ENSG00000107959.11	PITRM1	0.791928761	0.009790435	0.428402216	0.317848009	0.491213778	7.37E-15	5.12E-13	37	37	37
ENSG00000221946.3	FXYD7	0.791721943	0.380528368	0.428522825	0.000213875	0.053983668	0.025834701	0.033498902	2	2	2
ENSG00000180638.13	SLC47A2	-0.791091485	-0.021251041	0.428890608	0.084030451	0.076323423	0.007682322	0.01327718	14	28	28
ENSG00000074527.7	NTN4	0.791005254	0.013139289	0.428940926	0.238954666	0.103458752	0.001768977	0.004197554	72	78	78
ENSG00000145692.10	BHMT	-0.790983244	-0.024094804	0.428953769	0.063897237	0.067322344	0.012503347	0.019396916	12	14	14
ENSG00000163512.9	AZI2	-0.789905186	-0.009504645	0.429583142	0.43220684	0.105204275	0.001608953	0.003888587	74	83	83
ENSG00000119446.9	RBM18	-0.789900369	-0.010302957	0.429585956	0.275548435	0.070428935	0.010567178	0.016984923	63	69	69
ENSG00000100075.5	SLC25A1	-0.78936299	-0.013362206	0.429899881	0.18582724	0.213555966	3.53E-06	2.47E-05	35	48	48
ENSG00000179331.2	RAB39A	-0.788652796	-0.002766258	0.430314964	0.776581063	0.154539398	0.000106034	0.000425518	145	165	165
ENSG00000171703.12	TCEA2	-0.788594752	-0.018550535	0.430348899	0.118516762	0.045288173	0.041681328	0.048235395	42	57	57
ENSG00000204120.10	GIGYF2	-0.787855868	-0.00760564	0.430781018	0.544911766	0.187173341	1.66E-05	9.12E-05	88	102	102
ENSG00000106392.6	C1GALT1	-0.787805561	-0.021467169	0.430810448	0.079297217	0.250003902	3.88E-07	3.48E-06	11	11	11
ENSG00000015475.14	BID	-0.786844237	-0.022878607	0.431373054	0.079777235	0.168616071	4.79E-05	0.000221468	49	54	54
ENSG00000186834.2	HEXIM1	0.786435608	0.0157507	0.431612329	0.174177583	0.089917243	0.003684378	0.007474886	43	52	52
ENSG00000122484.8	RPAP2	0.786184836	0.014995857	0.431759208	0.267362655	0.079525315	0.006461443	0.011600894	51	58	58
ENSG00000080854.10	IGSF9B	-0.78450163	-0.022547954	0.432745826	0.059017446	0.052994335	0.027272248	0.034823127	22	26	26
ENSG00000144040.8	SFXN5	0.78418077	0.011656016	0.432934047	0.257769114	0.061935621	0.016747969	0.024303947	57	65	65
ENSG00000119878.5	CRIPT	0.78395229	0.018084345	0.433068106	0.114392564	0.236751573	8.76E-07	7.11E-06	16	18	18
ENSG00000165091.11	TMC1	0.782952601	0.01778351	0.433654947	0.113998638	0.078867227	0.006695398	0.011901478	31	33	33
ENSG00000109519.8	GRPEL1	0.781360018	0.045598948	0.43459078	0.014611884	0.061778668	0.016891431	0.024449053	3	3	3
ENSG00000170075.8	GPR37L1	-0.781237667	-0.35314744	0.434662724	0.000183701	0.078473378	0.00683945	0.012101086	2	2	2
ENSG00000196187.7	TMEM63A	0.781091752	0.041547565	0.434748532	0.024680005	0.064017268	0.014957744	0.022393444	6	7	7
ENSG00000105953.10	OGDH	-0.780706386	-0.388073438	0.434975204	0.000195246	0.10030098	0.00209965	0.004811215	2	2	2
ENSG00000043143.16	PHF15	-0.780638551	-0.009195349	0.435015111	0.481197848	0.214363161	3.37E-06	2.36E-05	81	88	88
ENSG00000138185.12	ENTPD1	-0.780237382	-0.019672209	0.435251163	0.103829771	0.123126431	0.000605001	0.001800629	56	62	62
ENSG00000106077.14	ABHD11	-0.77997975	-0.026185591	0.435402794	0.04272063	0.140862682	0.000227437	0.000797852	6	6	6
ENSG00000180596.7	HIST1H2BC	0.779322798	0.010779711	0.435789588	0.191334834	0.075486438	0.008037935	0.013761522	67	70	70
ENSG00000161328.10	LRRC56	0.778946817	0.019125813	0.436011044	0.088337954	0.146816369	0.000163315	0.000607879	18	22	22
ENSG00000181585.3	TMIE	0.778937392	0.011176405	0.436016596	0.390499169	0.137881831	0.000268309	0.000919159	70	86	86
ENSG00000143226.9	FCGR2A	0.776934213	0.010882988	0.437197585	0.150772908	0.092251687	0.00324725	0.006745432	40	45	45
ENSG00000149823.3	VPS51	-0.776801445	-0.015799469	0.437275924	0.153014018	0.102678389	0.001845536	0.004339742	50	61	61
ENSG00000105889.10	STEAP1B	0.776348856	0.009760462	0.437543034	0.252385882	0.121106154	0.000675843	0.001952592	64	72	72
ENSG00000137804.8	NUSAP1	-0.775657954	-0.012198339	0.437950972	0.389485232	0.337363515	1.28E-09	2.28E-08	51	55	55
ENSG00000189001.6	SBSN	-0.775578339	-0.140442012	0.437997994	0.001588347	0.06490146	0.014257049	0.021576708	2	2	2
ENSG00000149218.4	ENDOD1	-0.775437943	-0.016880508	0.438080922	0.109521517	0.08701904	0.004309501	0.008479337	20	22	22
ENSG00000131591.13	C1orf159	-0.775101986	-0.023443298	0.438279398	0.063595907	0.142644362	0.000206008	0.000733962	9	12	12
ENSG00000175170.10	FAM182B	0.774134743	0.03178798	0.438851114	0.031495425	0.139291892	0.000248143	0.00085894	13	24	24
ENSG00000198081.6	ZBTB14	-0.773884322	-0.008494517	0.438999202	0.654984612	0.173499606	3.63E-05	0.000174812	130	137	137
ENSG00000092094.6	OSGEP	-0.773698462	-0.009233596	0.43910913	0.375113369	0.562039457	8.12E-18	1.24E-15	21	25	25
ENSG00000136929.8	HEMGN	-0.772500083	-0.007727095	0.439818298	0.493425965	0.119531838	0.000736683	0.002080631	93	105	105
ENSG00000075035.5	WSCD2	0.772152246	0.036367975	0.440024261	0.061041847	0.096762464	0.002543601	0.005592323	58	63	63
ENSG00000130770.13	ATPIF1	-0.771414102	-0.024668758	0.440461519	0.062050304	0.092261935	0.00324545	0.006745432	9	10	10
ENSG00000242574.4	HLA-DMB	0.769916091	0.008504877	0.441349668	0.518236729	0.183800862	2.01E-05	0.000107348	128	180	180
ENSG00000108384.10	RAD51C	-0.769051968	-0.009210747	0.441862461	0.33959735	0.528045928	2.42E-16	2.52E-14	95	98	98
ENSG00000171729.9	TMEM51	-0.769025205	-0.013383734	0.441878348	0.142546946	0.099992923	0.002135025	0.004879092	35	39	39
ENSG00000110200.4	ANAPC15	0.768804032	0.016063053	0.442009655	0.235876885	0.180584092	2.42E-05	0.000124605	51	73	73
ENSG00000124459.7	ZNF45	0.767733146	0.009643994	0.44264574	0.225401641	0.09580419	0.002679123	0.005786639	74	84	84
ENSG00000256980.4	KHDC1L	0.767064855	0.021265785	0.443042956	0.083024064	0.183359838	2.06E-05	0.000109469	23	26	26
ENSG00000141568.15	FOXK2	0.766968906	0.496650572	0.443100003	0.000148501	0.065639632	0.013697504	0.020911883	1	1	1
ENSG00000152670.14	DDX4	-0.766524738	-0.016890194	0.443364138	0.150425741	0.045052376	0.042229203	0.04867888	38	42	42
ENSG00000196418.8	ZNF124	-0.766131626	-0.024603611	0.443597987	0.05737121	0.207486753	5.06E-06	3.34E-05	9	11	11
ENSG00000135127.7	CCDC64	-0.766030331	-0.012321601	0.443658255	0.196512569	0.063983933	0.014984831	0.022418003	69	82	82
ENSG00000181004.5	BBS12	-0.765601795	-0.009477214	0.443913276	0.41813001	0.110594788	0.001199999	0.003060836	104	120	120
ENSG00000186765.7	FSCN2	0.765244831	0.041731587	0.444125769	0.019867942	0.050131342	0.031910355	0.039209897	9	13	13
ENSG00000128383.8	APOBEC3A	-0.76517303	-0.024441139	0.444168517	0.062876	0.133835601	0.000335596	0.001115148	6	6	6
ENSG00000183977.9	PP2D1	0.76473598	0.024322818	0.444428776	0.037082285	0.06854465	0.011702206	0.018467888	11	15	15
ENSG00000155287.6	SLC25A28	-0.764623279	-0.010995018	0.444495903	0.263343015	0.167306687	5.16E-05	0.000235113	51	61	61
ENSG00000164385.5	C6orf195	0.76419297	0.009154751	0.444752255	0.448723813	0.308147325	9.33E-09	1.26E-07	67	72	72
ENSG00000183060.11	LYSMD4	0.763782481	0.010436761	0.444996879	0.318900489	0.199079014	8.29E-06	5.09E-05	53	58	58
ENSG00000107593.15	PKD2L1	-0.761880526	-0.012039853	0.446131314	0.180182947	0.104307375	0.001689296	0.00403734	48	53	53
ENSG00000182903.11	ZNF721	-0.759250969	-0.01899911	0.447702441	0.083644952	0.09789806	0.002391804	0.005342207	16	26	26
ENSG00000170322.10	NFRKB	0.758830509	0.018714678	0.447953953	0.086934632	0.071854705	0.009782491	0.016091976	20	23	23
ENSG00000113812.9	ACTR8	0.758814815	0.019065174	0.447963342	0.092747869	0.057586304	0.021220915	0.029046322	29	30	30
ENSG00000162191.9	UBXN1	-0.758233192	-0.01269771	0.448311394	0.18540827	0.146535042	0.000165896	0.000614431	33	43	43
ENSG00000102796.6	DHRS12	-0.75749463	-0.012564662	0.448753582	0.16755	0.288147267	3.47E-08	4.13E-07	28	31	31
ENSG00000131876.12	SNRPA1	-0.75665009	-0.024183295	0.449259524	0.056463825	0.050665968	0.030986719	0.038332938	35	38	38
ENSG00000099849.10	RASSF7	0.756540574	0.020000752	0.449325156	0.073320075	0.065680361	0.013667284	0.020874473	20	30	30
ENSG00000182117.4	NOP10	-0.756088891	-0.013680456	0.449595902	0.183890166	0.4682657	5.49E-14	2.95E-12	17	19	19
ENSG00000168298.4	HIST1H1E	0.755814018	0.179660868	0.449760711	0.001119458	0.050305037	0.031607222	0.038929111	3	3	3
ENSG00000111802.9	TDP2	0.755693962	0.032817587	0.449832705	0.037590252	0.044872625	0.042651845	0.048919006	28	29	29
ENSG00000120337.7	TNFSF18	0.754688534	0.012279524	0.450435888	0.228323997	0.189155875	1.48E-05	8.27E-05	45	49	49
ENSG00000155542.7	SETD9	0.753040148	0.015002215	0.451425789	0.13994293	0.351686145	4.71E-10	1.00E-08	18	20	20
ENSG00000138685.8	FGF2	0.752838562	0.045993995	0.451546931	0.013532091	0.048222933	0.035443962	0.042484137	8	8	8
ENSG00000130433.3	CACNG6	0.751362307	0.016903692	0.452434641	0.156338876	0.170736224	4.25E-05	0.000200643	51	77	77
ENSG00000144791.5	LIMD1	0.751008918	0.025627526	0.452647289	0.040886766	0.07276534	0.009312228	0.015492873	16	19	19
ENSG00000163879.9	DNALI1	-0.75065275	-0.033854478	0.452861666	0.023444234	0.072291597	0.00955397	0.015808636	54	55	55
[truncated: 1,763 more rows]

## Sheet: Whole_blood
S-prediXcan for HC (Pediatric+adult) for whole blood
[truncated: 6,670 more rows]
