# Supplementary material for: Low-frequency variation in TP53 has large effects on head circumference and intracranial volume
Source: Nat Commun. 2019 Jan 21;10:357. doi: 10.1038/s41467-018-07863-x (PMC6341110; doi:10.1038/s41467-018-07863-x)
Supplement: Supplementary file 12 — Supplementary Data 9 [file 41467_2018_7863_MOESM12_ESM.csv]

trait1	trait2	PMID	Category	ethnicity	note	rg	se	z	p	h2_obs	h2_obs_se	h2_int	h2_int_se	gcov_int	gcov_int_se
Entire	Adiponectin	22479202	cardiometabolic	Mixed	Caution: using this data may yield less robust results due to minor departure of the LD structure; SNPs from the MHC (chr6 26M~34M) region was removed for this traits	-0.0099	0.1011	-0.0984	0.9216	0.1205	0.0253	1.022	0.0122	0.0133	0.0056
Entire	Age of smoking initiation	20418890	smoking_behaviour	European	SNPs from the MHC (chr6 26M~34M) region was removed for this traits	0.1222	0.1492	0.819	0.4128	0.0621	0.0184	0.999	0.0061	0.0054	0.0042
Entire	Child birth length	25281659	anthropometric	European	SNPs from the MHC (chr6 26M~34M) region was removed for this traits	0.4171	0.0898	4.6424	3.4434e-06	0.1702	0.0233	0.9925	0.0071	0.0855	0.0052
Entire	Child birth weight	23202124	anthropometric	European	SNPs from the MHC (chr6 26M~34M) region was removed for this traits	0.4988	0.1117	4.4652	8.0011e-06	0.1127	0.0183	1.0044	0.006	0.0476	0.0048
Entire	Body mass index	20935630	anthropometric	European	SNPs from the MHC (chr6 26M~34M) region was removed for this traits	0.2534	0.0458	5.5379	3.0611e-08	0.1897	0.0097	1.0106	0.0105	0.0022	0.0052
Entire	Body fat	26833246	anthropometric	Mixed	Caution: using this data may yield less robust results due to minor departure of the LD structure; SNPs from the MHC (chr6 26M~34M) region was removed for this traits	0.2063	0.067	3.0796	0.0021	0.1068	0.0082	0.9048	0.0063	-0.0045	0.0049
Entire	Coronary artery disease	26343387	cardiometabolic	Mixed	Caution: using this data may yield less robust results due to minor departure of the LD structure; SNPs from the MHC (chr6 26M~34M) region was removed for this traits	-0.0031	0.0587	-0.0526	0.9581	0.0796	0.0058	1.0435	0.0093	-0.0094	0.0047
Entire	Childhood IQ	23358156	education	European	SNPs from the MHC (chr6 26M~34M) region was removed for this traits	0.2672	0.1121	2.3829	0.0172	0.2749	0.0451	1.0018	0.0093	0.0605	0.0061
Entire	Childhood obesity	22484627	anthropometric	European	SNPs from the MHC (chr6 26M~34M) region was removed for this traits	0.3746	0.0813	4.6098	4.0304e-06	0.4145	0.0458	0.9261	0.0075	0.0508	0.0047
Entire	Cigarettes smoked per day	20418890	smoking_behaviour	European	SNPs from the MHC (chr6 26M~34M) region was removed for this traits	-0.1325	0.1044	-1.2682	0.2047	0.0604	0.0151	1.0043	0.0061	0.0072	0.0047
Entire	Type 2 Diabetes	22885922	glycemic	European	SNPs from the MHC (chr6 26M~34M) region was removed for this traits	0.0085	0.0786	0.108	0.914	0.0891	0.0094	1.0065	0.007	-0.0131	0.0048
Entire	Depressive symptoms	27089181	psychiatric	European	SNPs from the MHC (chr6 26M~34M) region was removed for this traits	-0.1118	0.0742	-1.5063	0.132	0.0477	0.0037	0.9995	0.0072	-0.001	0.0054
Entire	Eczema	26482879	autoimmune	Mixed	Caution: using this data may yield less robust results due to minor departure of the LD structure; SNPs from the MHC (chr6 26M~34M) region was removed for this traits	-0.0736	0.1075	-0.6847	0.4935	0.0682	0.0152	1.0237	0.0072	-0.0168	0.0048
Entire	Years of schooling 2016	27225129	education	European	SNPs from the MHC (chr6 26M~34M) region was removed for this traits	0.1728	0.0414	4.1779	2.9424e-05	0.1268	0.0044	0.9274	0.0099	0.0142	0.0052
Entire	ICV	25607358	brain_volume	European	SNPs from the MHC (chr6 26M~34M) region was removed for this traits	0.908	0.1606	5.6529	1.5772e-08	0.1733	0.0455	1.0026	0.0067	0.0062	0.005
Entire	Mean Accumbens	25607358	brain_volume	European	Caution: using this data may yield results outside bounds due to relative low Z score of the SNP heritability of the trait; SNPs from the MHC (chr6 26M~34M) region was removed for this traits	0.3982	0.1624	2.4525	0.0142	0.0925	0.0363	0.9789	0.0064	-0.0169	0.0047
Entire	Mean Caudate	25607358	brain_volume	European	SNPs from the MHC (chr6 26M~34M) region was removed for this traits	0.1549	0.1034	1.4981	0.1341	0.2527	0.0387	0.9677	0.0061	-0.003	0.0047
Entire	Mean Hippocampus	25607358	brain_volume	European	SNPs from the MHC (chr6 26M~34M) region was removed for this traits	0.117	0.1223	0.9569	0.3386	0.1426	0.039	0.9871	0.0065	-0.0089	0.0049
Entire	Mean Pallidum	25607358	brain_volume	European	SNPs from the MHC (chr6 26M~34M) region was removed for this traits	0.1128	0.1231	0.9164	0.3594	0.1607	0.0414	0.9778	0.0069	-0.0116	0.005
Entire	Mean Putamen	25607358	brain_volume	European	SNPs from the MHC (chr6 26M~34M) region was removed for this traits	0.0934	0.0904	1.033	0.3016	0.2997	0.0459	0.9498	0.0068	-0.0146	0.005
Entire	Mean Thalamus	25607358	brain_volume	European	SNPs from the MHC (chr6 26M~34M) region was removed for this traits	0.0927	0.13	0.7134	0.4756	0.1405	0.0355	0.9791	0.0063	-0.0025	0.0048
Entire	Crohns disease	26192919	autoimmune	European	SNPs from the MHC (chr6 26M~34M) region was removed for this traits	0.0522	0.0581	0.8988	0.3688	0.5062	0.058	1.0219	0.0112	-0.008	0.0052
Entire	Inflammatory Bowel Disease (Euro)	26192919	autoimmune	European	SNPs from the MHC (chr6 26M~34M) region was removed for this traits	0.0305	0.0593	0.5135	0.6076	0.3373	0.0338	1.0519	0.0101	-0.0074	0.0054
Entire	Ulcerative colitis	26192919	autoimmune	European	SNPs from the MHC (chr6 26M~34M) region was removed for this traits	-0.0266	0.0728	-0.3662	0.7142	0.2611	0.0317	1.0461	0.0096	-0.0036	0.0051
Entire	Extreme bmi	23563607	anthropometric	European	SNPs from the MHC (chr6 26M~34M) region was removed for this traits	0.2501	0.0762	3.2834	0.001	0.6932	0.0545	1.0297	0.0112	0.0043	0.0071
Entire	Forearm Bone mineral density	26367794	bone	Mixed	Caution: using this data may yield results outside bounds due to relative low Z score of the SNP heritability of the trait; using this data may yield less robust results due to minor departure of the LD structure; SNPs from the MHC (chr6 26M~34M) region was removed for this traits	0.2931	0.1805	1.6237	0.1044	0.0873	0.0425	1.0117	0.0066	0.0027	0.0042
Entire	Fasting glucose main effect	22581228	glycemic	European	SNPs from the MHC (chr6 26M~34M) region was removed for this traits	-0.0171	0.0784	-0.2184	0.8271	0.0995	0.0191	0.9972	0.0096	-0.0059	0.0047
Entire	Fasting insulin main effect	22581228	glycemic	European	SNPs from the MHC (chr6 26M~34M) region was removed for this traits	0.1164	0.0849	1.3698	0.1707	0.0701	0.0101	1.0153	0.0069	-0.0008	0.0043
Entire	Fasting proinsulin	20081858	glycemic	European	Caution: using this data may yield results outside bounds due to relative low Z score of the SNP heritability of the trait; SNPs from the MHC (chr6 26M~34M) region was removed for this traits	-0.1815	0.1427	-1.2721	0.2033	0.1721	0.0887	0.9847	0.0097	-0.0033	0.0046
Entire	Femoral Neck bone mineral density	26367794	bone	Mixed	Caution: using this data may yield less robust results due to minor departure of the LD structure; SNPs from the MHC (chr6 26M~34M) region was removed for this traits	0.1216	0.0783	1.5538	0.1202	0.1254	0.0144	0.9757	0.008	0.0022	0.0049
Entire	Urinary albumin-to-creatinine ratio (non-diabetes)	26631737	kidney	European	SNPs from the MHC (chr6 26M~34M) region was removed for this traits	0.0588	0.117	0.5026	0.6152	0.053	0.0105	0.9953	0.0072	0.0033	0.005
Entire	Chronic Kidney Disease	26831199	kidney	Mixed	Caution: using this data may yield less robust results due to minor departure of the LD structure; SNPs from the MHC (chr6 26M~34M) region was removed for this traits	-0.1973	0.1363	-1.4472	0.1479	0.0177	0.0059	1.0179	0.009	-0.0018	0.0049
Entire	Serum creatinine (non-diabetes)	26831199	kidney	Mixed	Caution: using this data may yield less robust results due to minor departure of the LD structure; SNPs from the MHC (chr6 26M~34M) region was removed for this traits	0.1198	0.0612	1.9575	0.0503	0.1145	0.0107	0.9796	0.0133	-0.0114	0.0053
Entire	Serum creatinine	26831199	kidney	Mixed	Caution: using this data may yield less robust results due to minor departure of the LD structure; SNPs from the MHC (chr6 26M~34M) region was removed for this traits	0.1231	0.0606	2.0323	0.0421	0.1073	0.0095	0.9764	0.0133	-0.0106	0.0053
Entire	Serum cystatin c	26831199	kidney	Mixed	Caution: using this data may yield less robust results due to minor departure of the LD structure; SNPs from the MHC (chr6 26M~34M) region was removed for this traits	0.0512	0.09	0.5691	0.5693	0.1689	0.0668	0.9621	0.0142	-0.0048	0.0056
Entire	Urinary albumin-to-creatinine ratio	26631737	kidney	European	SNPs from the MHC (chr6 26M~34M) region was removed for this traits	0.0309	0.1111	0.278	0.781	0.0458	0.0089	0.9961	0.0068	0.0016	0.005
Entire	Former vs Current smoker	20418890	smoking_behaviour	European	SNPs from the MHC (chr6 26M~34M) region was removed for this traits	0.0877	0.1114	0.787	0.4313	0.0624	0.0103	1.0011	0.0066	-0.0073	0.0041
Entire	Asthma	17611496	autoimmune	European	SNPs from the MHC (chr6 26M~34M) region was removed for this traits	-0.0573	0.1425	-0.402	0.6877	0.1162	0.0269	1.0111	0.0083	-0.0025	0.0059
Entire	Anorexia Nervosa	24514567	psychiatric	European	SNPs from the MHC (chr6 26M~34M) region was removed for this traits	-0.0773	0.064	-1.2082	0.227	0.5552	0.0311	0.8989	0.0071	-0.008	0.005
Entire	Extreme height	23563607	anthropometric	European	SNPs from the MHC (chr6 26M~34M) region was removed for this traits	0.3357	0.0727	4.6187	3.8607e-06	1.23	0.1062	1.0366	0.0175	0.0101	0.0083
Entire	Extreme waist-to-hip ratio	23563607	anthropometric	European	SNPs from the MHC (chr6 26M~34M) region was removed for this traits	0.0512	0.1179	0.4346	0.6639	0.36	0.0569	0.9773	0.0084	0.0005	0.0068
Entire	Height_2010	20881960	anthropometric	European	SNPs from the MHC (chr6 26M~34M) region was removed for this traits	0.3417	0.0482	7.0864	1.3760e-12	0.286	0.0163	1.0173	0.0185	0.0239	0.0066
Entire	Obesity class 1	23563607	anthropometric	European	SNPs from the MHC (chr6 26M~34M) region was removed for this traits	0.252	0.0576	4.3757	1.2106e-05	0.2176	0.0116	1.0175	0.0111	-0.0011	0.0065
Entire	Obesity class 2	23563607	anthropometric	European	SNPs from the MHC (chr6 26M~34M) region was removed for this traits	0.2011	0.0667	3.0178	0.0025	0.1843	0.0123	1.0022	0.0098	0.0105	0.0065
Entire	Obesity class 3	23563607	anthropometric	European	SNPs from the MHC (chr6 26M~34M) region was removed for this traits	0.1022	0.0901	1.1343	0.2567	0.1216	0.0141	0.9801	0.0091	0.0092	0.0061
Entire	Overweight	23563607	anthropometric	European	SNPs from the MHC (chr6 26M~34M) region was removed for this traits	0.2711	0.0597	4.5437	5.5285e-06	0.1097	0.0065	1.0242	0.0096	0.0018	0.0053
Entire	Neo-conscientiousness	21173776	personality	European	Caution: using this data may yield results outside bounds due to relative low Z score of the SNP heritability of the trait; SNPs from the MHC (chr6 26M~34M) region was removed for this traits	0.0536	0.1688	0.3175	0.7508	0.0734	0.0299	0.9999	0.0068	-0.0016	0.0052
Entire	Neo-openness to experience	21173776	personality	European	SNPs from the MHC (chr6 26M~34M) region was removed for this traits	-0.1478	0.15	-0.9849	0.3247	0.1058	0.027	0.9917	0.0066	0.0019	0.0054
Entire	HDL cholesterol	20686565	lipids	European	SNPs from the MHC (chr6 26M~34M) region was removed for this traits	0.0695	0.0552	1.2586	0.2082	0.127	0.023	1.0588	0.0495	-0.0064	0.0053
Entire	Hip circumference	25673412	anthropometric	European	SNPs from the MHC (chr6 26M~34M) region was removed for this traits	0.3945	0.0569	6.9329	4.1225e-12	0.1272	0.0058	0.8609	0.008	0.0038	0.0052
Entire	Alzheimers disease	24162737	neurological	European	SNPs from the MHC (chr6 26M~34M) region was removed for this traits	-0.2476	0.136	-1.8206	0.0687	0.0446	0.0212	1.0662	0.0294	0.0031	0.0053
Entire	Infant head circumference	22504419	anthropometric	European	SNPs from the MHC (chr6 26M~34M) region was removed for this traits	1.164	0.1223	9.5139	1.8364e-21	0.2314	0.0445	0.9902	0.0066	0.2377	0.0054
Entire	LDL cholesterol	20686565	lipids	European	SNPs from the MHC (chr6 26M~34M) region was removed for this traits	-0.1885	0.0793	-2.3786	0.0174	0.104	0.0284	1.0518	0.0483	0.0078	0.0051
Entire	Leptin_adjBMI	26833098	hormone	European	SNPs from the MHC (chr6 26M~34M) region was removed for this traits	-0.0268	0.1081	-0.2479	0.8042	0.0948	0.0174	1.0035	0.007	0.0005	0.0049
Entire	Leptin_not_adjBMI	26833098	hormone	European	SNPs from the MHC (chr6 26M~34M) region was removed for this traits	0.1242	0.1063	1.1687	0.2425	0.0987	0.0159	0.9946	0.0065	0.0048	0.0049
Entire	Lumbar Spine bone mineral density	26367794	bone	Mixed	Caution: using this data may yield less robust results due to minor departure of the LD structure; SNPs from the MHC (chr6 26M~34M) region was removed for this traits	0.2069	0.0756	2.7355	0.0062	0.1313	0.0151	0.9776	0.008	-0.0055	0.0042
Entire	2hr glucose adjusted for BMI	20081857	glycemic	European	Caution: using this data may yield results outside bounds due to relative low Z score of the SNP heritability of the trait; SNPs from the MHC (chr6 26M~34M) region was removed for this traits	0.1991	0.152	1.3101	0.1901	0.1034	0.0343	0.9929	0.0071	0.0007	0.0047
Entire	HbA1C	20858683	glycemic	European	SNPs from the MHC (chr6 26M~34M) region was removed for this traits	-0.0794	0.1031	-0.7701	0.4413	0.0645	0.0117	1	0.0071	-0.0051	0.0047
Entire	HOMA-B	20081858	glycemic	European	SNPs from the MHC (chr6 26M~34M) region was removed for this traits	0.1477	0.1048	1.4089	0.1589	0.0912	0.0135	0.9884	0.0064	-0.0002	0.0046
Entire	HOMA-IR	20081858	glycemic	European	SNPs from the MHC (chr6 26M~34M) region was removed for this traits	0.172	0.1138	1.5115	0.1306	0.0678	0.0124	1.0035	0.0065	-0.0039	0.0052
Entire	Age at Menarche	25231870	reproductive	European	SNPs from the MHC (chr6 26M~34M) region was removed for this traits	-0.1571	0.0461	-3.4087	0.0007	0.2024	0.0099	0.953	0.0116	-0.0011	0.0056
Entire	Age at Menopause	26414677	reproductive	European	SNPs from the MHC (chr6 26M~34M) region was removed for this traits	0.0339	0.0615	0.5511	0.5816	0.1363	0.0158	0.9891	0.0138	-0.0034	0.0046
Entire	Heart rate	23583979	haemotological	Mixed	Caution: using this data may yield less robust results due to minor departure of the LD structure; SNPs from the MHC (chr6 26M~34M) region was removed for this traits	-0.0607	0.0736	-0.8244	0.4097	0.0846	0.0092	1.0121	0.0086	-0.0076	0.005
Entire	Serumurate overweight	25811787	uric_acid	European	Caution: using this data may yield results outside bounds due to relative low Z score of the SNP heritability of the trait; SNPs from the MHC (chr6 26M~34M) region was removed for this traits	-0.1069	0.1098	-0.9735	0.3303	0.5155	0.2936	0.9707	0.0259	0.0026	0.0043
Entire	Mean platelet volume	22139419	haemotological	European	SNPs from the MHC (chr6 26M~34M) region was removed for this traits	-0.0553	0.0728	-0.7597	0.4475	0.3197	0.0508	0.9815	0.0107	0.0007	0.0049
Entire	Neuroticism	27089181	personality	European	SNPs from the MHC (chr6 26M~34M) region was removed for this traits	-0.06	0.0603	-0.9956	0.3195	0.0892	0.0074	0.9904	0.0118	-0.0064	0.0056
Entire	Attention deficit hyperactivity disorder	20732625	psychiatric	European	Caution: using this data may yield results outside bounds due to relative low Z score of the SNP heritability of the trait; SNPs from the MHC (chr6 26M~34M) region was removed for this traits	-0.2736	0.1529	-1.7891	0.0736	0.2436	0.0924	1.0064	0.0062	-0.0024	0.0041
Entire	Bipolar disorder	21926972	psychiatric	European	SNPs from the MHC (chr6 26M~34M) region was removed for this traits	-0.0179	0.0689	-0.2599	0.7949	0.4354	0.037	1.0217	0.0074	0.0022	0.0048
Entire	PGC cross-disorder analysis	23453885	psychiatric	European	SNPs from the MHC (chr6 26M~34M) region was removed for this traits	-0.0513	0.0693	-0.7408	0.4588	0.1708	0.0133	1.0156	0.0115	0.0033	0.0072
Entire	Major depressive disorder	22472876	psychiatric	European	SNPs from the MHC (chr6 26M~34M) region was removed for this traits	0.01	0.1023	0.0975	0.9223	0.173	0.0257	1.0044	0.0061	-0.004	0.0048
Entire	Autism spectrum disorder	0	psychiatric	European	SNPs from the MHC (chr6 26M~34M) region was removed for this traits	0.0947	0.0885	1.0699	0.2847	0.4655	0.0512	0.9634	0.0065	0.0047	0.0043
Entire	Parkinsons disease	19915575	neurological	European	SNPs from the MHC (chr6 26M~34M) region was removed for this traits	-0.0185	0.0951	-0.1941	0.8461	0.4105	0.1185	1.1237	0.0089	0.0082	0.0046
Entire	Platelet count	22139419	haemotological	European	SNPs from the MHC (chr6 26M~34M) region was removed for this traits	-0.1044	0.0691	-1.51	0.131	0.1194	0.0115	0.9858	0.0083	0.0054	0.0049
Entire	Rheumatoid Arthritis	24390342	autoimmune	European	SNPs from the MHC (chr6 26M~34M) region was removed for this traits	-0.0625	0.0639	-0.978	0.3281	0.1608	0.0286	1.0225	0.0162	-0.0053	0.0051
Entire	Schizophrenia	25056061	psychiatric	Mixed	Caution: using this data may yield less robust results due to minor departure of the LD structure; SNPs from the MHC (chr6 26M~34M) region was removed for this traits	-0.044	0.0482	-0.9127	0.3614	0.4601	0.0193	1.0511	0.0132	-0.002	0.0068
Entire	College completion	23722424	education	European	SNPs from the MHC (chr6 26M~34M) region was removed for this traits	0.1462	0.0684	2.136	0.0327	0.0793	0.0057	1.021	0.0087	0.0098	0.0053
Entire	Acetoacetate	27005778	metabolites	European	Caution: using this data may yield results outside bounds due to relative low Z score of the SNP heritability of the trait; SNPs from the MHC (chr6 26M~34M) region was removed for this traits	0.3104	0.1462	2.1228	0.0338	0.0749	0.0276	0.9797	0.0071	-0.0064	0.0048
Entire	Acetate	27005778	metabolites	European	Caution: using this data may yield results outside bounds due to relative low Z score of the SNP heritability of the trait; SNPs from the MHC (chr6 26M~34M) region was removed for this traits	0.25	0.1554	1.6086	0.1077	0.0565	0.0192	1.001	0.0068	-0.0047	0.0044
Entire	Alanine	27005778	metabolites	European	SNPs from the MHC (chr6 26M~34M) region was removed for this traits	-0.0866	0.1286	-0.6732	0.5008	0.0859	0.027	1.0113	0.0072	0.0059	0.0047
Entire	Albumin	27005778	metabolites	European	Caution: using this data may yield results outside bounds due to relative low Z score of the SNP heritability of the trait; SNPs from the MHC (chr6 26M~34M) region was removed for this traits	0.1217	0.1655	0.7353	0.4622	0.0588	0.0242	0.99	0.0067	-0.0039	0.0043
Entire	Apolipoprotein A-I	27005778	metabolites	European	SNPs from the MHC (chr6 26M~34M) region was removed for this traits	-0.0192	0.149	-0.1291	0.8973	0.0741	0.0316	1.0049	0.012	0.0036	0.0045
Entire	Apolipoprotein B	27005778	metabolites	European	SNPs from the MHC (chr6 26M~34M) region was removed for this traits	-0.0393	0.1442	-0.2727	0.7851	0.0827	0.0402	1.0088	0.0149	0.0062	0.0047
Entire	Ratio of bisallylic groups to double bonds	27005778	metabolites	European	Caution: using this data may yield results outside bounds due to relative low Z score of the SNP heritability of the trait; SNPs from the MHC (chr6 26M~34M) region was removed for this traits	0.0846	0.0952	0.8892	0.3739	0.2989	0.1063	0.9767	0.009	0.002	0.005
Entire	Ratio of bisallylic groups to total fatty acids	27005778	metabolites	European	Caution: using this data may yield results outside bounds due to relative low Z score of the SNP heritability of the trait; SNPs from the MHC (chr6 26M~34M) region was removed for this traits	0.0658	0.0958	0.6871	0.492	0.2757	0.0947	0.9854	0.008	0.0039	0.005
Entire	Average number of methylene groups per a double bond	27005778	metabolites	European	Caution: using this data may yield results outside bounds due to relative low Z score of the SNP heritability of the trait; SNPs from the MHC (chr6 26M~34M) region was removed for this traits	-0.0251	0.1084	-0.2317	0.8168	0.2022	0.0778	0.9954	0.0082	-0.0052	0.005
Entire	Citrate	27005778	metabolites	European	SNPs from the MHC (chr6 26M~34M) region was removed for this traits	0.0072	0.1328	0.054	0.9569	0.0702	0.0208	1.0125	0.0076	-0.0017	0.0048
Entire	Creatinine	27005778	metabolites	European	SNPs from the MHC (chr6 26M~34M) region was removed for this traits	-0.1468	0.1013	-1.4488	0.1474	0.1154	0.0252	1.0117	0.0074	0.0043	0.0046
Entire	Average number of double bonds in a fatty acid chain	27005778	metabolites	European	SNPs from the MHC (chr6 26M~34M) region was removed for this traits	0.0297	0.1089	0.2724	0.7853	0.1731	0.0528	1.0012	0.0078	0.005	0.005
Entire	22:6 docosahexaenoic acid	27005778	metabolites	European	SNPs from the MHC (chr6 26M~34M) region was removed for this traits	0.0794	0.1381	0.5754	0.565	0.1323	0.037	0.9955	0.0073	0.0031	0.0048
Entire	Free cholesterol to esterified cholesterol ratio	27005778	metabolites	European	Caution: using this data may yield results outside bounds due to relative low Z score of the SNP heritability of the trait; SNPs from the MHC (chr6 26M~34M) region was removed for this traits	-0.0801	0.2276	-0.3519	0.7249	0.0604	0.0507	1.0127	0.0128	0.0062	0.0051
Entire	Description of average fatty acid chain length; not actual carbon number	27005778	metabolites	European	SNPs from the MHC (chr6 26M~34M) region was removed for this traits	0.1125	0.1389	0.8102	0.4178	0.1016	0.0343	0.9827	0.0066	0.0008	0.0045
Entire	Omega-3 fatty acids	27005778	metabolites	European	SNPs from the MHC (chr6 26M~34M) region was removed for this traits	0.0192	0.1376	0.1392	0.8893	0.1547	0.0414	0.9913	0.0078	0.003	0.0047
Entire	Omega-9 and saturated fatty acids	27005778	metabolites	European	Caution: using this data may yield results outside bounds due to relative low Z score of the SNP heritability of the trait; SNPs from the MHC (chr6 26M~34M) region was removed for this traits	-0.0808	0.1626	-0.4967	0.6194	0.0885	0.0428	0.9956	0.008	0.0006	0.0048
Entire	Free cholesterol	27005778	metabolites	European	Caution: using this data may yield results outside bounds due to relative low Z score of the SNP heritability of the trait; SNPs from the MHC (chr6 26M~34M) region was removed for this traits	-0.0199	0.2044	-0.0973	0.9225	0.071	0.0423	1.0226	0.0109	0.0012	0.005
Entire	Glucose	27005778	metabolites	European	SNPs from the MHC (chr6 26M~34M) region was removed for this traits	0.0344	0.1215	0.2835	0.7768	0.0873	0.0212	0.9953	0.0066	-0.0047	0.0045
Entire	Glutamine	27005778	metabolites	European	SNPs from the MHC (chr6 26M~34M) region was removed for this traits	-0.0267	0.1473	-0.1813	0.8562	0.063	0.0206	1.018	0.0076	0.0046	0.0049
Entire	Glycoprotein acetyls; mainly a1-acid glycoprotein	27005778	metabolites	European	SNPs from the MHC (chr6 26M~34M) region was removed for this traits	-0.0258	0.1239	-0.2082	0.8351	0.1016	0.0292	0.985	0.0065	-0.0021	0.0044
Entire	Total cholesterol in HDL	27005778	metabolites	European	SNPs from the MHC (chr6 26M~34M) region was removed for this traits	-0.0394	0.1256	-0.314	0.7535	0.0924	0.0285	1.0072	0.0129	0.0029	0.0045
Entire	Mean diameter for HDL particles	27005778	metabolites	European	SNPs from the MHC (chr6 26M~34M) region was removed for this traits	0.007	0.1105	0.0635	0.9494	0.1164	0.0302	1.0095	0.0192	0.0038	0.0045
Entire	Total cholesterol in IDL	27005778	metabolites	European	SNPs from the MHC (chr6 26M~34M) region was removed for this traits	0.0292	0.1708	0.1713	0.864	0.0712	0.0461	1.0189	0.02	0.0056	0.005
Entire	Free cholesterol in IDL	27005778	metabolites	European	SNPs from the MHC (chr6 26M~34M) region was removed for this traits	0.0491	0.1612	0.3048	0.7605	0.0712	0.0416	1.0202	0.0202	0.0037	0.0049
Entire	Total lipids in IDL	27005778	metabolites	European	SNPs from the MHC (chr6 26M~34M) region was removed for this traits	0.0412	0.1641	0.2513	0.8016	0.0741	0.0447	1.0191	0.0191	0.0047	0.0049
Entire	Concentration of IDL particles	27005778	metabolites	European	SNPs from the MHC (chr6 26M~34M) region was removed for this traits	0.0473	0.1602	0.2953	0.7678	0.0758	0.0433	1.0182	0.0183	0.004	0.0048
Entire	Phospholipids in IDL	27005778	metabolites	European	SNPs from the MHC (chr6 26M~34M) region was removed for this traits	0.066	0.1666	0.3961	0.6921	0.0615	0.0419	1.021	0.0195	0.0032	0.0047
Entire	Triglycerides in IDL	27005778	metabolites	European	SNPs from the MHC (chr6 26M~34M) region was removed for this traits	0.0216	0.1246	0.1737	0.8621	0.1094	0.0345	1.0101	0.0152	0.0018	0.0046
Entire	Isoleucine	27005778	metabolites	European	SNPs from the MHC (chr6 26M~34M) region was removed for this traits	0.0632	0.1382	0.4577	0.6472	0.0722	0.0238	0.9941	0.0066	-0.0025	0.0047
Entire	Total cholesterol in large HDL	27005778	metabolites	European	SNPs from the MHC (chr6 26M~34M) region was removed for this traits	-0.0618	0.1186	-0.5216	0.6019	0.1026	0.0288	1.0076	0.0146	0.0047	0.0045
Entire	Cholesterol esters in large HDL	27005778	metabolites	European	SNPs from the MHC (chr6 26M~34M) region was removed for this traits	-0.0479	0.1147	-0.4179	0.6761	0.1209	0.031	1.0017	0.0144	0.0046	0.0047
Entire	Free cholesterol in large HDL	27005778	metabolites	European	SNPs from the MHC (chr6 26M~34M) region was removed for this traits	-0.0784	0.1189	-0.6593	0.5097	0.1033	0.0283	1.0096	0.0143	0.0055	0.0045
Entire	Total lipids in large HDL	27005778	metabolites	European	SNPs from the MHC (chr6 26M~34M) region was removed for this traits	-0.0438	0.109	-0.402	0.6877	0.1276	0.0307	1.0018	0.0151	0.0039	0.0046
Entire	Concentration of large HDL particles	27005778	metabolites	European	SNPs from the MHC (chr6 26M~34M) region was removed for this traits	-0.0411	0.108	-0.3806	0.7035	0.1298	0.0302	1.0006	0.0154	0.0037	0.0046
Entire	Phospholipids in large HDL	27005778	metabolites	European	SNPs from the MHC (chr6 26M~34M) region was removed for this traits	-0.0411	0.1098	-0.3743	0.7082	0.1246	0.0302	0.9994	0.0143	0.0027	0.0046
Entire	Total cholesterol in large LDL	27005778	metabolites	European	SNPs from the MHC (chr6 26M~34M) region was removed for this traits	-0.09	0.171	-0.5262	0.5987	0.0649	0.047	1.0152	0.0228	0.0089	0.005
Entire	Cholesterol esters in large LDL	27005778	metabolites	European	SNPs from the MHC (chr6 26M~34M) region was removed for this traits	-0.036	0.1631	-0.2208	0.8253	0.0754	0.0512	1.0128	0.022	0.0074	0.005
Entire	Free cholesterol in large LDL	27005778	metabolites	European	SNPs from the MHC (chr6 26M~34M) region was removed for this traits	-0.0474	0.1748	-0.2714	0.7861	0.0638	0.0486	1.0172	0.0238	0.0073	0.0051
Entire	Total lipids in large LDL	27005778	metabolites	European	SNPs from the MHC (chr6 26M~34M) region was removed for this traits	-0.0223	0.1635	-0.1362	0.8917	0.0745	0.0518	1.0149	0.0223	0.0068	0.005
Entire	Concentration of large LDL particles	27005778	metabolites	European	SNPs from the MHC (chr6 26M~34M) region was removed for this traits	-0.0215	0.1619	-0.133	0.8942	0.075	0.0506	1.0162	0.0217	0.0065	0.005
Entire	Phospholipids in large LDL	27005778	metabolites	European	SNPs from the MHC (chr6 26M~34M) region was removed for this traits	-0.0713	0.1711	-0.417	0.6767	0.0626	0.045	1.0175	0.0215	0.0074	0.0049
Entire	Total cholesterol in large VLDL	27005778	metabolites	European	SNPs from the MHC (chr6 26M~34M) region was removed for this traits	-0.0082	0.1183	-0.0694	0.9447	0.1196	0.0285	0.9904	0.0066	0.0022	0.0047
Entire	Cholesterol esters in large VLDL	27005778	metabolites	European	SNPs from the MHC (chr6 26M~34M) region was removed for this traits	-0.0143	0.1008	-0.1418	0.8872	0.1656	0.0345	0.9772	0.0069	0.0034	0.0048
Entire	Free cholesterol in large VLDL	27005778	metabolites	European	SNPs from the MHC (chr6 26M~34M) region was removed for this traits	0.0091	0.113	0.0807	0.9357	0.1255	0.0298	0.9877	0.0067	0.0008	0.0048
Entire	Total lipids in large VLDL	27005778	metabolites	European	SNPs from the MHC (chr6 26M~34M) region was removed for this traits	0.0525	0.1141	0.4604	0.6453	0.1407	0.0298	0.9846	0.0063	-0.0017	0.0048
Entire	Concentration of large VLDL particles	27005778	metabolites	European	SNPs from the MHC (chr6 26M~34M) region was removed for this traits	0.0059	0.1181	0.0497	0.9603	0.1338	0.0344	0.9731	0.0068	0.0021	0.0048
Entire	Phospholipids in large VLDL	27005778	metabolites	European	SNPs from the MHC (chr6 26M~34M) region was removed for this traits	0.072	0.1181	0.6099	0.5419	0.1183	0.0305	0.9886	0.0065	-0.0027	0.0048
Entire	Triglycerides in large VLDL	27005778	metabolites	European	SNPs from the MHC (chr6 26M~34M) region was removed for this traits	0.0667	0.1205	0.5534	0.58	0.1145	0.0287	0.9876	0.0063	-0.0025	0.0048
Entire	18:2 linoleic acid (LA)	27005778	metabolites	European	SNPs from the MHC (chr6 26M~34M) region was removed for this traits	-0.0588	0.1458	-0.403	0.687	0.1272	0.0486	1.0033	0.01	0.0021	0.0048
Entire	Total cholesterol in LDL	27005778	metabolites	European	SNPs from the MHC (chr6 26M~34M) region was removed for this traits	-0.0121	0.162	-0.0748	0.9404	0.0674	0.051	1.0145	0.0241	0.0072	0.005
Entire	Mean diameter for LDL particles	27005778	metabolites	European	Caution: using this data may yield results outside bounds due to relative low Z score of the SNP heritability of the trait; SNPs from the MHC (chr6 26M~34M) region was removed for this traits	0.099	0.1909	0.5189	0.6039	0.0476	0.0268	1.0004	0.0126	-0.0036	0.0043
Entire	Leucine	27005778	metabolites	European	Caution: using this data may yield results outside bounds due to relative low Z score of the SNP heritability of the trait; SNPs from the MHC (chr6 26M~34M) region was removed for this traits	-0.019	0.1737	-0.1093	0.913	0.0451	0.021	1.0094	0.0068	-0.0001	0.0047
Entire	Total cholesterol in medium HDL	27005778	metabolites	European	Caution: using this data may yield results outside bounds due to relative low Z score of the SNP heritability of the trait; SNPs from the MHC (chr6 26M~34M) region was removed for this traits	-0.0318	0.1642	-0.1938	0.8463	0.0558	0.0246	0.9982	0.0089	-0.0029	0.0049
Entire	Cholesterol esters in medium HDL	27005778	metabolites	European	Caution: using this data may yield results outside bounds due to relative low Z score of the SNP heritability of the trait; SNPs from the MHC (chr6 26M~34M) region was removed for this traits	-0.0266	0.1724	-0.154	0.8776	0.0555	0.0284	1	0.0089	-0.0026	0.005
Entire	Free cholesterol in medium HDL	27005778	metabolites	European	SNPs from the MHC (chr6 26M~34M) region was removed for this traits	-0.0657	0.1438	-0.4566	0.648	0.0699	0.0228	0.9963	0.0082	-0.0012	0.0046
Entire	Total lipids in medium HDL	27005778	metabolites	European	Caution: using this data may yield results outside bounds due to relative low Z score of the SNP heritability of the trait; SNPs from the MHC (chr6 26M~34M) region was removed for this traits	-0.0284	0.1569	-0.181	0.8564	0.0621	0.0259	0.9957	0.0079	-0.0021	0.0047
Entire	Concentration of medium HDL particles	27005778	metabolites	European	Caution: using this data may yield results outside bounds due to relative low Z score of the SNP heritability of the trait; SNPs from the MHC (chr6 26M~34M) region was removed for this traits	-0.0311	0.1512	-0.2057	0.837	0.0661	0.0257	0.9941	0.0075	-0.002	0.0046
Entire	Phospholipids in medium HDL	27005778	metabolites	European	SNPs from the MHC (chr6 26M~34M) region was removed for this traits	-0.0701	0.1397	-0.5015	0.616	0.0699	0.0229	0.9938	0.0077	-0.0013	0.0045
Entire	Total cholesterol in medium LDL	27005778	metabolites	European	SNPs from the MHC (chr6 26M~34M) region was removed for this traits	-0.087	0.1658	-0.5247	0.5998	0.0678	0.0472	1.0135	0.0223	0.0091	0.0051
Entire	Cholesterol esters in medium LDL	27005778	metabolites	European	SNPs from the MHC (chr6 26M~34M) region was removed for this traits	-0.0519	0.1567	-0.3312	0.7405	0.0796	0.05	1.0105	0.021	0.0078	0.005
Entire	Total lipids in medium LDL	27005778	metabolites	European	SNPs from the MHC (chr6 26M~34M) region was removed for this traits	-0.0379	0.1552	-0.2445	0.8069	0.0801	0.0504	1.0105	0.021	0.0074	0.0049
Entire	Concentration of medium LDL particles	27005778	metabolites	European	SNPs from the MHC (chr6 26M~34M) region was removed for this traits	-0.036	0.156	-0.231	0.8173	0.079	0.0492	1.0121	0.0203	0.0071	0.0049
Entire	Phospholipids in medium LDL	27005778	metabolites	European	SNPs from the MHC (chr6 26M~34M) region was removed for this traits	-0.0678	0.1564	-0.4334	0.6647	0.0723	0.043	1.0088	0.0194	0.0077	0.0049
Entire	Total cholesterol in medium VLDL	27005778	metabolites	European	SNPs from the MHC (chr6 26M~34M) region was removed for this traits	-0.0119	0.1028	-0.1158	0.9078	0.1271	0.0353	0.9913	0.0076	0.0034	0.0046
Entire	Cholesterol esters in medium VLDL	27005778	metabolites	European	SNPs from the MHC (chr6 26M~34M) region was removed for this traits	-0.0011	0.1021	-0.0106	0.9915	0.1528	0.0376	0.9859	0.008	0.0034	0.0047
Entire	Free cholesterol in medium VLDL	27005778	metabolites	European	SNPs from the MHC (chr6 26M~34M) region was removed for this traits	-0.0346	0.1091	-0.3172	0.7511	0.1135	0.0332	0.9948	0.0071	0.0036	0.0047
Entire	Total lipids in medium VLDL	27005778	metabolites	European	SNPs from the MHC (chr6 26M~34M) region was removed for this traits	-0.0409	0.1049	-0.3898	0.6967	0.1419	0.0339	0.9851	0.0066	0.0026	0.0047
Entire	Concentration of medium VLDL particles	27005778	metabolites	European	SNPs from the MHC (chr6 26M~34M) region was removed for this traits	-0.0035	0.1035	-0.0342	0.9727	0.1529	0.0353	0.9792	0.0068	-0.0006	0.0048
Entire	Phospholipids in medium VLDL	27005778	metabolites	European	SNPs from the MHC (chr6 26M~34M) region was removed for this traits	-0.0233	0.1085	-0.2145	0.8302	0.1126	0.0328	0.996	0.0069	0.0023	0.0046
Entire	Triglycerides in medium VLDL	27005778	metabolites	European	SNPs from the MHC (chr6 26M~34M) region was removed for this traits	-0.0065	0.1181	-0.0549	0.9562	0.0989	0.0298	0.9979	0.0065	0.0013	0.0047
Entire	Mono-unsaturated fatty acids	27005778	metabolites	European	Caution: using this data may yield results outside bounds due to relative low Z score of the SNP heritability of the trait; SNPs from the MHC (chr6 26M~34M) region was removed for this traits	-0.0358	0.1513	-0.2368	0.8128	0.1061	0.0419	0.9879	0.0079	-0.001	0.0049
Entire	Phenylalanine	27005778	metabolites	European	Caution: using this data may yield results outside bounds due to relative low Z score of the SNP heritability of the trait; SNPs from the MHC (chr6 26M~34M) region was removed for this traits	0.058	0.1478	0.3925	0.6947	0.0543	0.0215	1.0047	0.0069	-0.0027	0.0044
Entire	Total lipids in small HDL	27005778	metabolites	European	Caution: using this data may yield results outside bounds due to relative low Z score of the SNP heritability of the trait; SNPs from the MHC (chr6 26M~34M) region was removed for this traits	-0.1235	0.1624	-0.7605	0.447	0.0563	0.0259	1.0015	0.0074	-0.0006	0.0047
Entire	Triglycerides in small HDL	27005778	metabolites	European	Caution: using this data may yield results outside bounds due to relative low Z score of the SNP heritability of the trait; SNPs from the MHC (chr6 26M~34M) region was removed for this traits	0.0257	0.143	0.1794	0.8577	0.0669	0.0268	0.9985	0.0081	-0.0017	0.0046
Entire	Total cholesterol in small LDL	27005778	metabolites	European	SNPs from the MHC (chr6 26M~34M) region was removed for this traits	0.0684	0.1564	0.4372	0.662	0.0684	0.0441	1.0171	0.0194	0.0052	0.0049
Entire	Total lipids in small LDL	27005778	metabolites	European	SNPs from the MHC (chr6 26M~34M) region was removed for this traits	-0.0169	0.145	-0.1166	0.9072	0.0858	0.046	1.0085	0.0179	0.0071	0.0048
Entire	Concentration of small LDL particles	27005778	metabolites	European	SNPs from the MHC (chr6 26M~34M) region was removed for this traits	-0.0309	0.1402	-0.2205	0.8255	0.0939	0.0438	1.0072	0.0161	0.0072	0.0048
Entire	Total cholesterol in small VLDL	27005778	metabolites	European	SNPs from the MHC (chr6 26M~34M) region was removed for this traits	-0.0237	0.1255	-0.1888	0.8503	0.0914	0.0321	1.0052	0.0099	0.0045	0.0047
Entire	Free cholesterol in small VLDL	27005778	metabolites	European	SNPs from the MHC (chr6 26M~34M) region was removed for this traits	0.0099	0.1163	0.0851	0.9322	0.1126	0.0336	0.9997	0.0088	0.0018	0.0048
Entire	Total lipids in small VLDL	27005778	metabolites	European	SNPs from the MHC (chr6 26M~34M) region was removed for this traits	-0.013	0.1046	-0.1242	0.9012	0.1453	0.0373	0.9915	0.0082	0.0022	0.0048
Entire	Concentration of small VLDL particles	27005778	metabolites	European	SNPs from the MHC (chr6 26M~34M) region was removed for this traits	-0.0239	0.1034	-0.2311	0.8172	0.1513	0.0372	0.9898	0.0079	0.0022	0.0048
Entire	Phospholipids in small VLDL	27005778	metabolites	European	SNPs from the MHC (chr6 26M~34M) region was removed for this traits	-0.0225	0.1082	-0.2081	0.8352	0.1182	0.0352	0.9978	0.0086	0.0026	0.0047
Entire	Triglycerides in small VLDL	27005778	metabolites	European	SNPs from the MHC (chr6 26M~34M) region was removed for this traits	-0.0083	0.1076	-0.077	0.9386	0.1224	0.0349	0.9931	0.0073	0.0011	0.0048
Entire	Serum total cholesterol	27005778	metabolites	European	Caution: using this data may yield results outside bounds due to relative low Z score of the SNP heritability of the trait; SNPs from the MHC (chr6 26M~34M) region was removed for this traits	0.0517	0.1516	0.3411	0.7331	0.065	0.0374	1.022	0.0156	0.0054	0.0047
Entire	Serum total triglycerides	27005778	metabolites	European	SNPs from the MHC (chr6 26M~34M) region was removed for this traits	0.0014	0.1084	0.0131	0.9896	0.1271	0.0355	0.9913	0.0075	0.0015	0.0049
Entire	Tyrosine	27005778	metabolites	European	Caution: using this data may yield results outside bounds due to relative low Z score of the SNP heritability of the trait; SNPs from the MHC (chr6 26M~34M) region was removed for this traits	0.0548	0.1247	0.439	0.6606	0.0755	0.0269	0.9989	0.0064	-0.0018	0.0043
Entire	Valine	27005778	metabolites	European	SNPs from the MHC (chr6 26M~34M) region was removed for this traits	0.1108	0.145	0.7641	0.4448	0.0613	0.0195	1.0153	0.0075	-0.0023	0.0041
Entire	Mean diameter for VLDL particles	27005778	metabolites	European	SNPs from the MHC (chr6 26M~34M) region was removed for this traits	-0.0483	0.1111	-0.4353	0.6634	0.1373	0.0347	0.9888	0.0085	0.0004	0.005
Entire	Total cholesterol in very large HDL	27005778	metabolites	European	Caution: using this data may yield results outside bounds due to relative low Z score of the SNP heritability of the trait; SNPs from the MHC (chr6 26M~34M) region was removed for this traits	0.0331	0.2021	0.1638	0.8699	0.0307	0.0231	1.0143	0.0117	0.0054	0.0042
Entire	Free cholesterol in very large HDL	27005778	metabolites	European	Caution: using this data may yield results outside bounds due to relative low Z score of the SNP heritability of the trait; SNPs from the MHC (chr6 26M~34M) region was removed for this traits	0.0152	0.1664	0.0913	0.9273	0.0451	0.0251	1.0157	0.0139	0.005	0.0043
Entire	Total lipids in very large HDL	27005778	metabolites	European	Caution: using this data may yield results outside bounds due to relative low Z score of the SNP heritability of the trait; SNPs from the MHC (chr6 26M~34M) region was removed for this traits	-0.0426	0.1612	-0.2642	0.7916	0.0566	0.0283	1.0174	0.0151	0.0069	0.0043
Entire	Concentration of very large HDL particles	27005778	metabolites	European	Caution: using this data may yield results outside bounds due to relative low Z score of the SNP heritability of the trait; SNPs from the MHC (chr6 26M~34M) region was removed for this traits	-0.0536	0.1473	-0.3638	0.716	0.0621	0.0269	1.0031	0.0151	0.0071	0.0044
Entire	Phospholipids in very large HDL	27005778	metabolites	European	SNPs from the MHC (chr6 26M~34M) region was removed for this traits	-0.0407	0.1268	-0.3205	0.7486	0.0876	0.0299	1.0094	0.0171	0.0063	0.0045
Entire	Triglycerides in very large HDL	27005778	metabolites	European	Caution: using this data may yield results outside bounds due to relative low Z score of the SNP heritability of the trait; SNPs from the MHC (chr6 26M~34M) region was removed for this traits	0.0066	0.1273	0.0516	0.9588	0.0835	0.026	1.0155	0.0279	0.0061	0.0042
Entire	Total lipids in very large VLDL	27005778	metabolites	European	SNPs from the MHC (chr6 26M~34M) region was removed for this traits	-0.01	0.1149	-0.0873	0.9304	0.1386	0.0302	0.9777	0.0071	0.0023	0.0047
Entire	Concentration of very large VLDL particles	27005778	metabolites	European	SNPs from the MHC (chr6 26M~34M) region was removed for this traits	0.1021	0.1176	0.8679	0.3854	0.127	0.0297	0.9825	0.0068	-0.0024	0.0046
Entire	Phospholipids in very large VLDL	27005778	metabolites	European	SNPs from the MHC (chr6 26M~34M) region was removed for this traits	0.0467	0.127	0.3681	0.7128	0.108	0.028	0.9849	0.0067	0.0003	0.0048
Entire	Triglycerides in very large VLDL	27005778	metabolites	European	SNPs from the MHC (chr6 26M~34M) region was removed for this traits	0.0405	0.1178	0.344	0.7309	0.1207	0.0294	0.9805	0.007	-0.0002	0.0047
Entire	Total lipids in very small VLDL	27005778	metabolites	European	SNPs from the MHC (chr6 26M~34M) region was removed for this traits	0.0877	0.1284	0.6832	0.4945	0.1092	0.0362	1.009	0.013	0.0009	0.0045
Entire	Concentration of very small VLDL particles	27005778	metabolites	European	SNPs from the MHC (chr6 26M~34M) region was removed for this traits	0.0799	0.1238	0.6453	0.5187	0.1184	0.0356	1.0047	0.0125	0.0009	0.0045
Entire	Phospholipids in very small VLDL	27005778	metabolites	European	SNPs from the MHC (chr6 26M~34M) region was removed for this traits	0.0578	0.1489	0.3883	0.6978	0.0874	0.0382	1.0141	0.0157	0.0023	0.0046
Entire	Triglycerides in very small VLDL	27005778	metabolites	European	SNPs from the MHC (chr6 26M~34M) region was removed for this traits	0.0102	0.1102	0.093	0.9259	0.1405	0.0364	0.9977	0.0097	0.0014	0.0047
Entire	Total lipids in chylomicrons and largest VLDL particles	27005778	metabolites	European	SNPs from the MHC (chr6 26M~34M) region was removed for this traits	0.03	0.1261	0.2377	0.8122	0.1188	0.0273	0.9903	0.0066	0.0025	0.0048
Entire	Concentration of chylomicrons and largest VLDL particles	27005778	metabolites	European	SNPs from the MHC (chr6 26M~34M) region was removed for this traits	-0.0134	0.1208	-0.1105	0.912	0.1178	0.0266	0.9876	0.0065	0.0018	0.0047
Entire	Phospholipids in chylomicrons and largest VLDL particles	27005778	metabolites	European	SNPs from the MHC (chr6 26M~34M) region was removed for this traits	0.0482	0.1339	0.3597	0.7191	0.0977	0.0266	0.9846	0.0066	0.002	0.0049
Entire	Triglycerides in chylomicrons and largest VLDL particles	27005778	metabolites	European	SNPs from the MHC (chr6 26M~34M) region was removed for this traits	0.0861	0.1408	0.6115	0.5409	0.0925	0.0272	0.99	0.0066	-0.0005	0.0049
Entire	Subjective well being	27089181	psychiatric	European	SNPs from the MHC (chr6 26M~34M) region was removed for this traits	0.1376	0.0738	1.8637	0.0624	0.0252	0.0021	1.0006	0.007	-0.0045	0.0053
Entire	Ever vs never smoked	20418890	smoking_behaviour	European	SNPs from the MHC (chr6 26M~34M) region was removed for this traits	-0.0804	0.0737	-1.0916	0.275	0.0744	0.0065	0.9979	0.006	0.0049	0.0042
Entire	Triglycerides	20686565	lipids	European	SNPs from the MHC (chr6 26M~34M) region was removed for this traits	-0.1893	0.0599	-3.1603	0.0016	0.168	0.0288	0.9684	0.0162	0.0036	0.0053
Entire	Total Cholesterol	20686565	lipids	European	SNPs from the MHC (chr6 26M~34M) region was removed for this traits	-0.1865	0.0676	-2.7605	0.0058	0.1341	0.0241	1.0215	0.0348	0.0056	0.0052
Entire	Lung cancer (all)	24880342	cancer	European	SNPs from the MHC (chr6 26M~34M) region was removed for this traits	-0.1529	0.0908	-1.6836	0.0923	0.128	0.0295	1.0077	0.008	-0.0013	0.0043
Entire	Lung cancer (squamous cell)	24880342	cancer	European	Caution: using this data may yield results outside bounds due to relative low Z score of the SNP heritability of the trait; SNPs from the MHC (chr6 26M~34M) region was removed for this traits	-0.0724	0.1438	-0.5037	0.6145	0.0492	0.0195	1.0071	0.0067	-0.0036	0.0049
Entire	Waist circumference	25673412	anthropometric	European	SNPs from the MHC (chr6 26M~34M) region was removed for this traits	0.3266	0.0537	6.078	1.2166e-09	0.1211	0.0051	0.8453	0.0075	0.0019	0.0049
Entire	Waist-to-hip ratio	25673412	anthropometric	European	SNPs from the MHC (chr6 26M~34M) region was removed for this traits	0.1256	0.0498	2.5196	0.0117	0.1132	0.0069	0.9203	0.0088	0.0003	0.0052
Entire	Multiple sclerosis	21833088	autoimmune	European	Caution: using this data may yield results outside bounds due to relative low Z score of the SNP heritability of the trait; SNPs from the MHC (chr6 26M~34M) region was removed for this traits	-0.0267	0.1911	-0.14	0.8887	0.0591	0.0279	1.0577	0.0089	0.0017	0.006
Entire	Transferrin	25352340	metal	European	Caution: using this data may yield results outside bounds due to relative low Z score of the SNP heritability of the trait; SNPs from the MHC (chr6 26M~34M) region was removed for this traits	-0.0867	0.1098	-0.7893	0.43	0.1615	0.076	1.0623	0.024	0.0011	0.0063
Entire	Amyotrophic lateral sclerosis	27455348	neurological	European	Caution: using this data may yield results outside bounds due to relative low Z score of the SNP heritability of the trait; SNPs from the MHC (chr6 26M~34M) region was removed for this traits	-0.0264	0.1297	-0.2034	0.8389	0.0505	0.0131	0.9937	0.0064	0.0028	0.0043
Entire	Lung adenocarcinoma	27488534	cancer	European	Caution: using this data may yield results outside bounds due to relative low Z score of the SNP heritability of the trait; SNPs from the MHC (chr6 26M~34M) region was removed for this traits	-0.0945	0.1424	-0.6635	0.507	0.0319	0.0111	1.019	0.0063	-0.0045	0.0044
Entire	Squamous cell lung cancer	27488534	cancer	European	SNPs from the MHC (chr6 26M~34M) region was removed for this traits	-0.0357	0.1225	-0.2917	0.7705	0.0385	0.0121	1.0106	0.0065	-0.0028	0.0046
Entire	Ferritin	25352340	metal	European	SNPs from the MHC (chr6 26M~34M) region was removed for this traits	-0.1174	0.1513	-0.7758	0.4379	0.0913	0.0265	1.028	0.0093	0.0008	0.0066
Entire	Difference in height between adolescence and adulthood; age 14	23449627	anthropometric	European	SNPs from the MHC (chr6 26M~34M) region was removed for this traits	-0.2447	0.1274	-1.9209	0.0547	0.4562	0.1087	0.9809	0.0066	0.0074	0.0049
Entire	Parents age at death	27015805	aging	European	SNPs from the MHC (chr6 26M~34M) region was removed for this traits	0.109	0.1295	0.8413	0.4002	0.0286	0.0069	1.0164	0.0063	-0.0065	0.0047
Entire	Urate	23263486	other	European	SNPs from the MHC (chr6 26M~34M) region was removed for this traits	0.0091	0.0462	0.1962	0.8444	0.1762	0.0582	0.953	0.0488	0.0088	0.005
Entire	Mothers age at death	27015805	aging	European	SNPs from the MHC (chr6 26M~34M) region was removed for this traits	0.0828	0.1117	0.7412	0.4586	0.0356	0.0074	1.0131	0.0071	-0.0025	0.0046
Entire	Lung cancer	27488534	cancer	European	SNPs from the MHC (chr6 26M~34M) region was removed for this traits	-0.1393	0.0848	-1.6436	0.1003	0.3158	0.0657	1.0143	0.0072	0.0015	0.0042
Entire	Fathers age at death	27015805	aging	European	SNPs from the MHC (chr6 26M~34M) region was removed for this traits	-0.051	0.1072	-0.4758	0.6342	0.0396	0.007	1.0181	0.0069	0.0006	0.0048
Entire	Systemic lupus erythematosus	26502338	autoimmune	European	SNPs from the MHC (chr6 26M~34M) region was removed for this traits	0.0584	0.0862	0.6773	0.4982	0.3889	0.0667	1.1056	0.0098	-0.0157	0.0046
Entire	Primary biliary cirrhosis	26394269	autoimmune	European	SNPs from the MHC (chr6 26M~34M) region was removed for this traits	-0.1149	0.1033	-1.1128	0.2658	0.3761	0.0633	1.0037	0.0098	-0.0029	0.0054
Entire	Celiac disease	20190752	autoimmune	European	SNPs from the MHC (chr6 26M~34M) region was removed for this traits	-0.2403	0.1012	-2.3738	0.0176	0.3088	0.049	1.065	0.0108	0.0112	0.0066
Entire	Difference in height between childhood and adulthood; age 8	23449627	anthropometric	European	SNPs from the MHC (chr6 26M~34M) region was removed for this traits	-0.2319	0.1034	-2.2416	0.025	0.3354	0.0511	0.9719	0.0077	0.0031	0.0054
Entire	Sitting height ratio	25865494	anthropometric	European	SNPs from the MHC (chr6 26M~34M) region was removed for this traits	0.2422	0.0921	2.631	0.0085	0.2221	0.0283	0.9798	0.0076	-0.0039	0.005
Entire	Height; Females at age 10 and males at age 12	23449627	anthropometric	European	SNPs from the MHC (chr6 26M~34M) region was removed for this traits	0.508	0.0872	5.8276	5.6246e-09	0.431	0.0481	0.9525	0.0079	0.0571	0.0061
Entire	Sleep duration	27494321	sleeping	European	SNPs from the MHC (chr6 26M~34M) region was removed for this traits	0.1035	0.0702	1.4752	0.1402	0.0554	0.0048	1.0197	0.0072	-0.0002	0.0045
Entire	Birth weight	27680694	anthropometric	European	SNPs from the MHC (chr6 26M~34M) region was removed for this traits	0.4404	0.0564	7.814	5.5410e-15	0.1024	0.0066	1.0416	0.0097	0.0612	0.0047
Entire	Chronotype	27494321	sleeping	European	SNPs from the MHC (chr6 26M~34M) region was removed for this traits	0.0686	0.0583	1.1762	0.2395	0.1014	0.0058	1.0141	0.0076	-0.0054	0.0047
Entire	Years of schooling (proxy cognitive performance)	25201988	education	European	SNPs from the MHC (chr6 26M~34M) region was removed for this traits	0.2166	0.0647	3.3507	0.0008	0.1067	0.0074	1.0269	0.0092	0.0062	0.0056
Entire	Years of schooling 2013	23722424	education	European	SNPs from the MHC (chr6 26M~34M) region was removed for this traits	0.1619	0.0647	2.5005	0.0124	0.0843	0.0063	1.0189	0.0089	0.0051	0.0056
Entire	Neuroticism	24828478	personality	European	SNPs from the MHC (chr6 26M~34M) region was removed for this traits	-0.1843	0.1206	-1.5285	0.1264	0.0143	0.0033	1.0098	0.0062	-0.0008	0.005
Entire	Lumbar spine bone mineral density	22504420	bone	Mixed	Caution: using these data may yield less robust results due to minor departure of the LD structure; SNPs from the MHC (chr6 26M-34M) region were removed for this trait	0.089	0.0637	1.3966	0.1625	0.2711	0.0249	1.0127	0.0085	0.0007	0.0048
Entire	Femoral neck bone mineral density	22504420	bone	Mixed	Caution: using these data may yield less robust results due to minor departure of the LD structure; SNPs from the MHC (chr6 26M-34M) region were removed for this trait	0.1231	0.0673	1.8302	0.0672	0.304	0.0252	0.9803	0.0085	-0.0004	0.0049
Entire	Age of first birth	27798627	reproductive	European	SNPs from the MHC (chr6 26M~34M) region was removed for this traits	0.1371	0.055	2.4936	0.0126	0.063	0.0035	0.9512	0.0079	-0.0008	0.0048
Entire	Number of children ever born	27798627	reproductive	European	SNPs from the MHC (chr6 26M~34M) region was removed for this traits	-0.1427	0.0687	-2.0779	0.0377	0.0255	0.0018	0.9713	0.0071	0.0134	0.0047
Entire	Forced expiratory volume in 1 second (FEV1)	28166213	lung_function	European	SNPs from the MHC (chr6 26M~34M) region was removed for this traits	0.0943	0.063	1.4967	0.1345	0.2672	0.0173	0.9686	0.0071	-0.0099	0.0054
Entire	Forced Vital capacity(FVC)	28166213	lung_function	European	SNPs from the MHC (chr6 26M~34M) region was removed for this traits	0.0944	0.0617	1.5292	0.1262	0.2609	0.0162	0.9758	0.0072	-0.0081	0.0052
Entire	Forced expiratory volume in 1 second (FEV1)/Forced Vital capacity(FVC)	28166213	lung_function	European	SNPs from the MHC (chr6 26M~34M) region was removed for this traits	0.0675	0.061	1.1071	0.2682	0.2618	0.0207	0.9701	0.0083	-0.0097	0.0052
Entire	Forced expiratory volume in 1 second (FEV1)	26635082	lung_function	European	SNPs from the MHC (chr6 26M~34M) region was removed for this traits	0.1668	0.0893	1.8675	0.0618	0.1405	0.0157	0.992	0.0068	-0.0074	0.005
Entire	Forced expiratory volume in 1 second (FEV1)/Forced Vital capacity(FVC)	26635082	lung_function	European	SNPs from the MHC (chr6 26M~34M) region was removed for this traits	0.1213	0.0884	1.3732	0.1697	0.1133	0.0149	0.9816	0.0069	-0.0057	0.005
Entire	Forced Vital capacity(FVC)	26635082	lung_function	European	SNPs from the MHC (chr6 26M~34M) region was removed for this traits	0.071	0.0872	0.8145	0.4153	0.1462	0.015	0.9859	0.0066	-0.0026	0.0049
Entire	Forced expiratory volume in 1 second (FEV1)	21946350	lung_function	European	SNPs from the MHC (chr6 26M~34M) region was removed for this traits	0.0002	0.1003	0.0019	0.9985	0.172	0.0225	0.8812	0.0121	0.0092	0.0088
Entire	Forced expiratory volume in 1 second (FEV1)/Forced Vital capacity(FVC)	21946350	lung_function	European	SNPs from the MHC (chr6 26M~34M) region was removed for this traits	0.0122	0.0738	0.1654	0.8687	0.1231	0.0134	0.929	0.0078	-0.001	0.0047
Entire	Attention deficit hyperactivity disorder (GC)	27663945	psychiatric	European	Caution: using this data may yield results outside bounds due to relative low Z score of the SNP heritability of the trait; SNPs from the MHC (chr6 26M~34M) region was removed for this traits	-0.3159	0.1634	-1.9333	0.0532	0.0739	0.0297	0.9925	0.0074	-0.0578	0.0048
Entire	Attention deficit hyperactivity disorder (No GC)	27663945	psychiatric	European	Caution: using this data may yield results outside bounds due to relative low Z score of the SNP heritability of the trait; SNPs from the MHC (chr6 26M~34M) region was removed for this traits	-0.3172	0.1631	-1.9445	0.0518	0.0749	0.0302	1.0072	0.0075	-0.058	0.0049
Entire	Primary sclerosing cholangitis	27992413	autoimmune	Mixed	Caution: using this data may yield results outside bounds due to relative low Z score of the SNP heritability of the trait; SNPs from the MHC (chr6 26M~34M) region was removed for this traits	0.1363	0.0768	1.7756	0.0758	0.3952	0.1572	0.9937	0.0153	0.0026	0.0054
Entire	Intelligence	28530673	cognitive	European	SNPs from the MHC (chr6 26M~34M) region was removed for this traits	0.3243	0.0572	5.6702	1.4261e-08	0.1898	0.0104	1.008	0.008	0.0183	0.0047
Entire	Insomnia	28604731	sleeping	European	SNPs from the MHC (chr6 26M~34M) region was removed for this traits	-0.1071	0.0791	-1.3535	0.1759	0.0474	0.0048	1.0036	0.0071	-0.0054	0.0047
Entire	Ischemic stroke	26935894	cardiometabolic	Mixed	Caution: using these data may yield less robust results due to minor departure of the LD structure; SNPs from the MHC (chr6 26M-34M) region were removed for this trait	NA	NA	NA	NA	NA	NA	NA	NA	NA	NA
Entire	Insomnia	27992416	sleeping	European	SNPs from the MHC (chr6 26M~34M) region was removed for this traits	-0.0904	0.0707	-1.2796	0.2007	0.1333	0.0117	1.0024	0.0079	-0.0063	0.0049
Entire	Excessive daytime sleepiness	27992416	sleeping	European	SNPs from the MHC (chr6 26M~34M) region was removed for this traits	-0.0251	0.0662	-0.3794	0.7044	0.0545	0.0052	1.0016	0.0068	0.0018	0.004
