# Supplementary material for: Low-frequency variation in TP53 has large effects on head circumference and intracranial volume
Source: Nat Commun. 2019 Jan 21;10:357. doi: 10.1038/s41467-018-07863-x (PMC6341110; doi:10.1038/s41467-018-07863-x)
Supplement: Supplementary file 13 — Supplementary Data 10 [file 41467_2018_7863_MOESM13_ESM.csv]

LD-score enrichment analysis: GTEx and Roadmap (neural and bone tissues/cell types, multiple testing threshold p<4.8E-04)
Tissue/Cell type or Chromatin mark	Source	Paediatric+adult HC
		β	SE	p
Brain_Amygdala	GTEx Brain	-7.1E-10	8.9E-09	5.3E-01
Brain_Anterior_cingulate_cortex_(BA24)	GTEx Brain	5.2E-09	8.2E-09	2.6E-01
Brain_Caudate_(basal_ganglia)	GTEx Brain	9.1E-09	9.8E-09	1.8E-01
Brain_Cerebellar_Hemisphere	GTEx Brain	2.6E-08	1.2E-08	1.4E-02
Brain_Cerebellum	GTEx Brain	2.4E-08	1.5E-08	4.8E-02
Brain_Cortex	GTEx Brain	-1.2E-08	1.1E-08	8.4E-01
Brain_Frontal_Cortex_(BA9)	GTEx Brain	7.1E-09	1.0E-08	2.4E-01
Brain_Hippocampus	GTEx Brain	-3.7E-09	9.1E-09	6.6E-01
Brain_Hypothalamus	GTEx Brain	1.4E-08	1.0E-08	7.9E-02
Brain_Nucleus_accumbens_(basal_ganglia)	GTEx Brain	1.5E-08	9.4E-09	6.1E-02
Brain_Putamen_(basal_ganglia)	GTEx Brain	-6.5E-09	1.1E-08	7.2E-01
Brain_Spinal_cord_(cervical_c-1)	GTEx Brain	-4.8E-09	1.1E-08	6.7E-01
Brain_Substantia_nigra	GTEx Brain	7.0E-09	1.0E-08	2.5E-01
Brain_Angular_Gyrus__H3K27ac	Roadmap	1.6E-07	1.0E-07	5.2E-02
Brain_Angular_Gyrus__H3K36me3	Roadmap	1.3E-07	1.9E-07	2.5E-01
Brain_Angular_Gyrus__H3K4me1	Roadmap	2.6E-07	1.1E-07	8.6E-03
Brain_Angular_Gyrus__H3K4me3	Roadmap	9.4E-07	4.0E-07	9.4E-03
Brain_Angular_Gyrus__H3K9ac	Roadmap	3.3E-07	2.2E-07	6.6E-02
Brain_Anterior_Caudate__H3K27ac	Roadmap	1.9E-07	9.5E-08	2.1E-02
Brain_Anterior_Caudate__H3K36me3	Roadmap	5.5E-08	1.4E-07	3.5E-01
Brain_Anterior_Caudate__H3K4me1	Roadmap	2.2E-07	1.0E-07	1.4E-02
Brain_Anterior_Caudate__H3K4me3	Roadmap	4.4E-07	3.2E-07	8.4E-02
Brain_Anterior_Caudate__H3K9ac	Roadmap	3.5E-07	1.9E-07	3.6E-02
Brain_Cingulate_Gyrus__H3K27ac	Roadmap	1.6E-07	9.1E-08	3.8E-02
Brain_Cingulate_Gyrus__H3K36me3	Roadmap	2.6E-07	1.5E-07	3.8E-02
Brain_Cingulate_Gyrus__H3K4me1	Roadmap	2.0E-07	9.7E-08	2.1E-02
Brain_Cingulate_Gyrus__H3K4me3	Roadmap	9.1E-07	3.6E-07	5.2E-03
Brain_Cingulate_Gyrus__H3K9ac	Roadmap	3.4E-07	2.8E-07	1.1E-01
Brain_Dorsolateral_Prefrontal_Cortex__H3K27ac	Roadmap	2.1E-07	1.1E-07	3.4E-02
Brain_Dorsolateral_Prefrontal_Cortex__H3K36me3	Roadmap	2.2E-07	1.7E-07	1.0E-01
Brain_Dorsolateral_Prefrontal_Cortex__H3K4me1	Roadmap	2.8E-07	1.4E-07	2.3E-02
Brain_Dorsolateral_Prefrontal_Cortex__H3K4me3	Roadmap	5.4E-07	3.3E-07	5.1E-02
Brain_Dorsolateral_Prefrontal_Cortex__H3K9ac	Roadmap	4.8E-07	3.0E-07	5.8E-02
Brain_Germinal_Matrix__H3K36me3	Roadmap	1.2E-07	1.6E-07	2.3E-01
Brain_Germinal_Matrix__H3K4me1	Roadmap	1.1E-07	2.0E-07	2.9E-01
Brain_Germinal_Matrix__H3K4me3	Roadmap	8.3E-07	4.8E-07	4.1E-02
Brain_Hippocampus_Middle__H3K27ac	Roadmap	1.3E-07	9.0E-08	6.9E-02
Brain_Hippocampus_Middle__H3K36me3	Roadmap	1.1E-07	1.3E-07	2.1E-01
Brain_Hippocampus_Middle__H3K4me1	Roadmap	1.2E-07	7.4E-08	5.0E-02
Brain_Hippocampus_Middle__H3K4me3	Roadmap	7.3E-07	3.0E-07	7.4E-03
Brain_Inferior_Temporal_Lobe__H3K27ac	Roadmap	1.4E-07	8.1E-08	4.3E-02
Brain_Inferior_Temporal_Lobe__H3K36me3	Roadmap	1.9E-07	1.4E-07	8.5E-02
Brain_Inferior_Temporal_Lobe__H3K4me1	Roadmap	2.0E-07	1.3E-07	6.7E-02
Brain_Inferior_Temporal_Lobe__H3K4me3	Roadmap	4.7E-07	3.0E-07	6.3E-02
Brain_Inferior_Temporal_Lobe__H3K9ac	Roadmap	1.7E-07	2.2E-07	2.2E-01
Brain_Substantia_Nigra__H3K27ac	Roadmap	9.6E-08	8.0E-08	1.1E-01
Brain_Substantia_Nigra__H3K36me3	Roadmap	3.3E-07	2.3E-07	7.1E-02
Brain_Substantia_Nigra__H3K4me1	Roadmap	1.8E-07	8.8E-08	2.2E-02
Brain_Substantia_Nigra__H3K4me3	Roadmap	4.9E-07	3.5E-07	7.7E-02
Brain_Substantia_Nigra__H3K9ac	Roadmap	1.9E-07	2.4E-07	2.2E-01
Cortex_derived_primary_cultured_neurospheres__H3K36me3	Roadmap	1.2E-07	1.3E-07	1.8E-01
Cortex_derived_primary_cultured_neurospheres__H3K4me1	Roadmap	1.6E-07	1.0E-07	5.8E-02
Cortex_derived_primary_cultured_neurospheres__H3K4me3	Roadmap	1.1E-06	5.1E-07	1.2E-02
Fetal_Brain_Female__DNase	Roadmap	1.1E-07	2.2E-07	3.2E-01
Fetal_Brain_Female__H3K36me3	Roadmap	1.2E-07	1.2E-07	1.6E-01
Fetal_Brain_Female__H3K4me1	Roadmap	3.3E-07	1.7E-07	2.3E-02
Fetal_Brain_Female__H3K4me3	Roadmap	1.1E-06	3.7E-07	1.8E-03
Fetal_Brain_Male__DNase	Roadmap	2.9E-07	2.3E-07	1.0E-01
Fetal_Brain_Male__H3K36me3	Roadmap	1.2E-07	4.6E-07	3.9E-01
Fetal_Brain_Male__H3K4me1	Roadmap	1.2E-07	9.9E-08	1.2E-01
Fetal_Brain_Male__H3K4me3	Roadmap	1.0E-06	7.0E-07	7.8E-02
Ganglion_Eminence_derived_primary_cultured_neurospheres__H3K36me3	Roadmap	1.1E-07	1.3E-07	1.9E-01
Ganglion_Eminence_derived_primary_cultured_neurospheres__H3K4me1	Roadmap	2.6E-07	1.6E-07	4.9E-02
Ganglion_Eminence_derived_primary_cultured_neurospheres__H3K4me3	Roadmap	1.1E-06	3.6E-07	1.4E-03
Osteoblast_Primary_Cells__H3K27ac	Roadmap	1.2E-07	9.8E-08	1.1E-01
Osteoblast_Primary_Cells__H3K36me3	Roadmap	9.0E-08	8.7E-08	1.5E-01
Osteoblast_Primary_Cells__H3K4me1	Roadmap	6.8E-08	9.6E-08	2.4E-01
Osteoblast_Primary_Cells__H3K4me3	Roadmap	-3.0E-09	3.3E-07	5.0E-01
