# Supplementary material for: Low-frequency variation in TP53 has large effects on head circumference and intracranial volume
Source: Nat Commun. 2019 Jan 21;10:357. doi: 10.1038/s41467-018-07863-x (PMC6341110; doi:10.1038/s41467-018-07863-x)
Supplement: Supplementary file 14 — Supplementary Data 11 [file 41467_2018_7863_MOESM14_ESM.xlsx]

## Sheet: Sheet1
ICV + HC (Pediatric + adult) combined meta-analysis : Novel independent single variants (p < 5E-08)
					ICVa						HC(Pediatric + adult)b						ICVa+HC (Pediatric + adult)b						ICVa+HC(Pediatric+adult+follow-up)b,c						Gene list (Nearest genes with SNPs in LD with lead signal, r2=0.6, +/- 500 kb and +/- 2Mb for the MHC region)
Variant	Chr	Position (b37)	EA	EAF	Z	β*	SE	Direction	p	N	Z	β*	SE*	Direction	p	N	Z	β*	SE*	Direction	p	N	Z	β*	SE*	Direction	p	N
rs2168812	1	243777066	A	0.18	4.44	0.05	0.01	++	9.0E-06	26577	4.33	0.06	0.01	+++++-++++++	1.50E-05	18881	5.98	0.05	0.01	++	2.3E-09	45458	-	-	-	-	-	-	AKT3; SDCCAG8
rs4513262	2	10181457	T	0.21	4.94	0.05	0.01	++	7.7E-07	26455	3.06	0.04	0.01	+++++++--+++	2.30E-03	18881	5.55	0.05	0.01	++	2.9E-08	45336	-	-	-	-	-	-	CYS1; GRHL1; KLF11; RRM2
rs41288837	2	85531116	T	0.03	-3.79	-0.10	0.03	--	1.0E-04	26179	-4.80	-0.15	0.03	------?+---?	1.60E-06	17737	-5.79	-0.11	0.02	--	7.2E-09	43916	-	-	-	-	-	-	RETSAT; TCF7L1; TGOLN2
rs429150	6	32075563	T	0.52	4.17	0.04	0.01	++	3.1E-05	24242	3.85	0.04	0.01	++++++++++++	1.00E-04	18881	5.49	0.04	0.01	++	3.9E-08	43122	-	-	-	-	-	-	AGER; AGPAT1; ATF6B; C4A; C4B; CFB; CYP21A2; DXO; EGFL8; FKBPL; GPSM3; HLA-DQA1; HLA-DRB1; NELFE; NOTCH4; PBX2; PPT2; PRRT1; RNF5; SKIV2L; STK19; TNXB
rs9268812 (HC)d	6	32424568	A	0.35	1.05	0.02	0.02	++	3.0E-01	5957	6.06	0.07	0.01	+++++++++++-	1.30E-09	18881	5.65	0.05	0.01	++	1.6E-08	24838	5.72	0.05	0.01	+++	1.1E-08	25811	AGER; AGPAT1; ATF6B; BTNL2; C2; C4A; C4B; C6orf10; C6orf48; CFB; CYP21A2; DXO; EGFL8; EHMT2; FKBPL; GPSM3; HLA-B; HLA-C; HLA-DOB; HLA-DQA1; HLA-DQA2; HLA-DQB1; HLA-DQB2; HLA-DRA; HLA-DRB1; HLA-DRB5; HSPA1B; MICA; NELFE; NEU1; NOTCH4; PBX2; PPT2; PRRT1; PSMB8; PSMB9; RNF5; SKIV2L; SLC44A4; STK19; TAP1; TAP2; TNXB; ZBTB12
rs9271147d	6	32577385	T	0.17	3.52	0.06	0.02	++	4.3E-04	11176	5.42	0.07	0.01	++++-+++++++	6.45E-08	18881	6.24	0.07	0.01	++	4.4E-10	30057	-	-	-	-	-	-	AGER; AGPAT1; ATF6B; BTNL2; C2; C4A; C4B; C6orf10; C6orf48; CFB; CYP21A2; DXO; EGFL8; EHMT2; FKBPL; GPSM3; HLA-B; HLA-C; HLA-DOB; HLA-DQA1; HLA-DQA2; HLA-DQB1; HLA-DQB2; HLA-DRA; HLA-DRB1; HLA-DRB5; HSPA1B; MICA; NELFE; NEU1; NOTCH4; PBX2; PPT2; PRRT1; PSMB8; PSMB9; RNF5; SKIV2L; SLC44A4; STK19; TAP1; TAP2; TNXB; ZBTB12
rs11154343e	6	126412953	T	0.31	-5.65	-0.05	0.01	--	1.7E-08	26577	-2.51	-0.03	0.01	--++-+--+---	1.17E-02	18881	-5.73	-0.04	0.01	--	1.0E-08	45458	-	-	-	-	-	-	HINT3; NCOA7; TRMT11
rs7808664	7	32917550	A	0.37	-4.86	-0.04	0.01	--	1.2E-06	26577	-3.10	-0.03	0.01	---------++-	2.00E-03	18881	-5.51	-0.04	0.01	--	3.6E-08	45458	-	-	-	-	-	-	FKBP9; KBTBD2; NT5C3A
rs148974918	10	112033051	T	0.05	-3.91	-0.08	0.02	--	9.4E-05	26577	-4.32	-0.10	0.02	----+-------	1.60E-05	18881	-5.58	-0.08	0.02	--	2.4E-08	45458	-	-	-	-	-	-	MXI1; SMNDC1
rs3217870	12	4400111	T	0.62	-3.83	-0.03	0.01	--	1.0E-04	26577	-4.94	-0.05	0.01	-------+--+-	7.00E-07	18881	-5.93	-0.04	0.01	--	3.1E-09	45458	-	-	-	-	-	-	CCND2; TIGAR
rs2066827	12	12871099	T	0.77	4.62	0.05	0.01	++	3.9E-06	19990	3.92	0.05	0.01	+++++-++-+++	9.30E-05	18881	5.84	0.05	0.01	++	5.4E-09	38871	-	-	-	-	-	-	APOLD1; CDKN1B; GPR19
rs78378222f	17	7571752	G	0.0173	4.34	0.15	0.04	--	1.4E-05	23634	5.25	0.21	0.04	------?+---?	1.54E-07	17737	6.50	0.17	0.03	--	7.9E-11	41371	7.15	0.19	0.03	---	8.8E-13	42344	ATP1B2; CD68; DNAH2; EFNB3; EIF4A1; FXR2; MPDU1; POLR2A; SAT2; SENP3; SHBG; SLC35G6; SOX15; TNFSF12; TNFSF12-TNFSF13; TNFSF13; TP53; WRAP53; ZBTB4
rs35850753 (HC)f	17	7578671	T	0.02	3.17	0.10	0.03	++	1.5E-03	23972	5.62	0.21	0.04	++++++?+++++	2.00E-08	18584	5.90	0.14	0.02	++	3.6E-09	42556	6.58	0.16	0.02	+++	4.9E-11	43529	ATP1B2; CD68; DNAH2; EFNB3; EIF4A1; FXR2; MPDU1; POLR2A; SAT2; SENP3; SHBG; SLC35G6; SOX15; TNFSF12; TNFSF12-TNFSF13; TNFSF13; TP53; WRAP53; ZBTB4
Weighted Z-score meta-analysis
*Standardised regression coefficients
a - Intracranial volume meta-analysis of ENIGMA and CHARGE samples (Adams et al., 2016)
b - Combined pediatric and adult head circumference meta-analysis
c - Head circumference follow-up cohort comprising 973 individuals from the SPLIT-CROATIA sample with adult head circumference measures
d - rs9271147 is in LD with rs9268812 (r2=0.41), a novel GWAS signal from HC (Pediatric+adult)
e - rs11154343 is independent of the known ICV signal from Adams et al., 2016 and E.G.G. Consortium, 2012, rs11759026 (r2=0.03) and rs4273712 (r2=0.04) respectively
f - rs78378222 is in LD with rs35850753 (r2=0.56), a novel GWAS signal from HC (Pediatric+adult)
Greyed signals did not pass the adjusted threshold for genome-wide significance (p < 3.3x10-8)
