# Supplementary material for: Low-frequency variation in TP53 has large effects on head circumference and intracranial volume
Source: Nat Commun. 2019 Jan 21;10:357. doi: 10.1038/s41467-018-07863-x (PMC6341110; doi:10.1038/s41467-018-07863-x)
Supplement: Supplementary file 15 — Supplementary Data 12 [file 41467_2018_7863_MOESM15_ESM.xlsx]

## Sheet: Sheet1
ICV + HC (Pediatric + adult) combined meta-analysis : Known single variant signals for head circumference (HC), intracranial volume (ICV) and brain volume
						ICV						pediatric + adult HC						ICV+HC (pediatric + adult)
Trait	Variant	Chr	Position (b37)	EA	EAF	Z	β*	SE*	Direction	p	N	Z	β*	SE*	Direction	p	N	Z	β*	SE*	Direction	p	N
Intracranial volume and infant head circumference [1]	rs6734848	2	183866063	A	0.13	4.74	0.06	0.01	++	2.11E-06	26577	3.94	0.06	0.02	++++++++-+--	8.02E-05	18881.1	5.96	0.06	0.01	++	2.52E-09	45458.1
Intracranial volume and infant head circumference [1]	rs2271386	3	141712708	A	0.16	4.77	0.06	0.01	++	1.84E-06	26577	3.41	0.05	0.01	++++++-+++-+	6.67E-04	18881	5.64	0.05	0.01	++	1.70E-08	45458
Intracranial volume [1]	rs9811910	3	190670902	C	0.09	6.00	0.09	0.02	++	1.99E-09	25947	3.52	0.07	0.02	++++-++++-++	4.29E-04	18881	6.61	0.08	0.01	++	3.83E-11	44828
Intracranial volume [1]	rs2022464	6	108945370	A	0.32	-6.61	-0.06	0.01	--	3.74E-11	26577	-5.06	-0.06	0.01	------------	4.10E-07	18881	-8.04	-0.06	0.01	--	9.12E-16	45458
Intracranial volume [1]	rs11759026	6	126792095	A	0.75	-9.25	-0.09	0.01	--	2.24E-20	26393	-3.11	-0.04	0.01	--+-----+---	1.83E-03	18881	-8.74	-0.07	0.01	--	2.27E-18	45274
Intracranial volume [2]	rs4273712	6	126964510	A	0.72	-8.99	-0.09	0.01	--	2.38E-19	26577	-4.87	-0.06	0.01	--+---------	1.04E-06	18881	-9.67	-0.07	0.01	--	3.96E-22	45458
Intracranial volume and infant head circumference [1]	rs7802256	7	33111950	T	0.15	-4.90	-0.06	0.01	--	9.85E-07	26455	-1.52	-0.02	0.02	-------+++-+	1.28E-01	18881.1	-4.55	-0.04	0.01	--	5.42E-06	45336.1
Brain volume [3]	rs3779381	7	120966790	A	0.74	1.25	0.01	0.01	+-	2.11E-01	26577	-0.93	-0.01	0.01	-+-++------+	3.51E-01	18880.9	0.33	0.00	0.01	+-	7.41E-01	45457.9
Brain volume [3]	rs2536185	7	120984041	T	0.46	-0.69	-0.01	0.01	--	4.88E-01	26577	-0.16	0.00	0.01	+-+-++---+++	8.74E-01	18881	-0.61	0.00	0.01	--	5.43E-01	45458
Intracranial volume [1]	rs11191683	10	105170649	T	0.33	6.45	0.06	0.01	++	1.09E-10	26577	2.69	0.03	0.01	+++--+-+++-+	7.44E-03	18881.1	6.42	0.05	0.01	++	1.37E-10	45458.1
Intracranial volume [4]	rs10784502	12	66343810	T	0.52	-5.47	-0.05	0.01	--	4.55E-08	26577	-4.40	-0.05	0.01	-----+-----+	1.13E-05	18881	-6.77	-0.04	0.01	--	1.26E-11	45458
Infant head circumference [5]	rs1042725	12	66358347	T	0.51	-5.81	-0.05	0.01	--	6.44E-09	26577	-4.48	-0.05	0.01	-----+-----+	8.27E-06	18881	-7.06	-0.05	0.01	--	1.63E-12	45458
Intracranial volume [1]	rs138074335	12	66374247	A	0.51	5.81	0.05	0.01	++	6.22E-09	26577	1.51	0.04	0.02	??+???????++	1.31E-01	3897.01	5.58	0.05	0.01	+?	2.43E-08	26577
Intracranial volume [1]	rs2195243	12	102922986	C	0.22	-5.66	-0.06	0.01	--	1.48E-08	26455	-1.25	-0.02	0.01	--+-++++-+--	2.12E-01	18881.1	-4.94	-0.04	0.01	--	7.83E-07	45336.1
Infant head circumference [5]	rs7980687	12	123822711	A	0.22	1.91	0.02	0.01	++	5.56E-02	26577	5.63	0.07	0.01	++++++++++--	1.57E-08	18880.9	4.96	0.04	0.01	++	7.10E-07	45457.9
Infant head circumference [5]	rs11655470	17	43795433	T	0.41	3.00	0.06	0.02	++	2.71E-03	5619	1.18	0.01	0.01	+++-+++----+	2.41E-01	18881	2.38	0.02	0.01	++	1.72E-02	24500
Intracranial volume [6]	rs17689882	17	43906828	A	0.22	-7.54	-0.10	0.01	--	4.76E-14	16560	-3.35	-0.04	0.01	---+-+----+-	8.34E-04	18881.1	-7.33	-0.07	0.01	--	2.39E-13	35441.1
Intracranial volume [2]	rs9303525	17	44187257	A	0.77	4.80	0.10	0.02	++	1.57E-06	6272	3.47	0.04	0.01	+++-+-++++-+	4.95E-04	18881.1	5.25	0.06	0.01	++	1.56E-07	25153.1
Intracranial volume [1]	rs199525	17	44847834	T	0.79	9.44	0.10	0.01	++	3.77E-21	26577	3.01	0.04	0.01	-++-+--+++-+	2.59E-03	18881	8.82	0.07	0.01	++	1.12E-18	45458
Intracranial volume and infant head circumference [1]	rs10483213	22	42339525	A	0.10	-4.91	-0.07	0.01	--	9.35E-07	25697	-3.23	-0.06	0.02	------------	1.25E-03	18881	-5.62	-0.06	0.01	--	1.88E-08	44578
Weighted Z-score meta-analysis
*Standardised regression coefficients
HC - Combined pediatric+Adult head circumference meta-analysis
Follow up - Head circumference follow-up cohort comprising 973 individuals from the SPLIT-CROATIA sample with adult head circumference measures
Known variants are described in Supplementary Table S7
Variants in burgundy showed increased evidence for association compared to the original study (Supplementary Table S7)
References
1 Adams, H.H., et al., Novel genetic loci underlying human intracranial volume identified through genome-wide association. Nature neuroscience, 2016. 19: p. 1569-1582.
2 Consortium, E.G.G., Common variants at 6q22 and 17q21 are associated with intracranial volume. Nature genetics, 2012. 44(5): p. 539-544.
3 Elliott, L., et al., The genetic basis of human brain structure and function: 1,262 genome-wide associations found from 3,144 GWAS of multimodal brain imaging phenotypes from 9,707 UK Biobank participants. bioRxiv, 2017.
4 Stein, J.L., et al., Identification of common variants associated with human hippocampal and intracranial volumes. Nature genetics, 2012. 44(5): p. 552-561.
5 Taal, H.R., et al., Common variants at 12q15 and 12q24 are associated with infant head circumference. Nature genetics, 2012. 44(5): p. 532-538.
6 Hibar, D.P., et al., Common genetic variants influence human subcortical brain structures. Nature, 2015. 520(7546): p. 224-229.
