# Supplementary material for: Low-frequency variation in TP53 has large effects on head circumference and intracranial volume
Source: Nat Commun. 2019 Jan 21;10:357. doi: 10.1038/s41467-018-07863-x (PMC6341110; doi:10.1038/s41467-018-07863-x)
Supplement: Supplementary file 19 — Supplementary Data 16 [file 41467_2018_7863_MOESM19_ESM.xlsx]

## Sheet: Sheet1
FUMA. SNP annotation: ICV+HC (Pediatric+adult): Novel independent single variants (p < 5E-08)
uniqID	rsID	chr	pos	non_effect_allele	effect_allele	MAF	nearestGene	dist	func	CADD	RDB	minChrState	commonChrState	posMapFilt	eqtlMapFilt	ciMapFilt	Proxy id	Proxy rs	proxy LD	proxy nearestGene	proxy dist	proxy func	proxy CADD	proxy RDB	proxy minChrState	proxy commonChrState	proxy posMapFilt	proxy eqtlMapFilt	proxy ciMapFilt
1:243777066:A:G	rs2168812	1	243777066	G	A	0.1948	AKT3	0	intronic	15.64	6	4	5	1	1	1	1:243741941:C:T	rs12408455	0.993434	AKT3	0	intronic	17.87	7	4	5	1	1	1
2:10181457:C:T	rs4513262	2	10181457	C	T	0.1819	RP11-254F7.2	0	upstream	0.11	7	5	5	0	1	1	2:10183554:C:CGGCCGGGCACG	rs112040334	0.909312	KLF11	0	intronic	17.22	NA	1	1	1	0	1
2:85531116:C:T	rs41288837	2	85531116	C	T	0.02386	TCF7L1	0	exonic	24.30	7	4	4	1	0	1
6:32075563:C:T	rs429150	6	32075563	C	T	0.4891	TNXB	0	intronic	5.69	NA	1	7	0	1	1
6:32424568:A:G	rs9268812 (HC)a	6	32424568	G	A	0.2803	HLA-DRB9	3030	intergenic	0.18	6	9	14	0	0	1
6:32577385:C:T	rs9271147a	6	32577385	C	T	0.1352	HLA-DQA1	18571	intergenic	1.99	4	2	15	0	1	1	6:32456018:G:T	rs113705785	0.70528	HLA-DRB9	14741	intergenic	12.89	5	7	15	0	0	1
6:126412953:C:T	rs11154343	6	126412953	C	T	0.3211	TRMT11	52531	intergenic	6.72	5	5	15	0	1	1	6:126375581:C:T	rs1268119	0.730277	TRMT11	15159	intergenic	11.26	NA	4	5	0	1	1
7:32917550:A:G	rs7808664	7	32917550	G	A	0.3628	AVL9:KBTBD2	0	intronic:intronic	0.34	5	1	5	0	1	1	7:32908135:C:G	rs1045530	0.991845	KBTBD2	0	UTR3	14.34	6	4	4	1	1	1
10:112033051:C:T	rs148974918	10	112033051	C	T	0.04473	MXI1	0	intronic	0.42	5	5	5	0	0	1
12:4400111:C:T	rs3217870	12	4400111	C	T	0.3459	CCND2	0	intronic	2.70	5	2	4	0	1	1	12:4392391:A:C	rs3217827	0.608764	CCND2	0	intronic	7.446	4	3	4	0	0	1
12:12871099:G:T	rs2066827	12	12871099	G	T	0.2425	CDKN1B	0	exonic	11.36	2b	1	1	0	0	1
17:7571752:G:T	rs78378222b	17	7571752	T	G	0.01292	TP53	0	UTR3	17.97	NA	2	4	1	0	1
17:7578671:C:T	rs35850753 (HC)b	17	7578671	C	T	0.02485	TP53	0	intronic	1.04	NA	4	4	0	0	1
a - rs9271147 is in LD with rs9268812 (r2=0.41), a novel GWAS signal from HC (Pediatric+adult)
b - rs78378222 is in LD with rs35850753 (r2=0.56), a novel GWAS signal from HC (Pediatric+adult)
Variants with the strongest CADD score that are in LD with the lead signal (r2>0.6) are detailed as proxy
All FUMA analyses were conducted using derived standardized effect estimates only.
