# Supplementary material for: Low-frequency variation in TP53 has large effects on head circumference and intracranial volume
Source: Nat Commun. 2019 Jan 21;10:357. doi: 10.1038/s41467-018-07863-x (PMC6341110; doi:10.1038/s41467-018-07863-x)
Supplement: Supplementary file 20 — Supplementary Data 17 [file 41467_2018_7863_MOESM20_ESM.xlsx]

## Sheet: Sheet1
FUMA. Genes mapped by SNPs: ICV+HC (Pediatric+adult): Novel independent single variants (p < 5E-08)
ensg	symbol	chr	start	end	strand	type	entrezID	HUGO	pLI	ncRVIS	posMapSNPs	posMapMaxCADD	eqtlMapSNPs	eqtlMapminP	eqtlMapminQ	eqtlMapts	eqtlDirection	ciMap	ciMapts	IndSigSNPs
ENSG00000091483	FH	1	241660903	241683061	-1	protein_coding	2271	FH	0.148694445	-0.408382093	0	0	0	NA	NA	NA	NA	Yes	Mesenchymal_Stem_Cell	rs2168812
ENSG00000117009	KMO	1	241695434	241758944	1	protein_coding	8564	KMO	0.000261679	0.20575903	0	0	0	NA	NA	NA	NA	Yes	Mesenchymal_Stem_Cell	rs2168812
ENSG00000203668	CHML	1	241792155	241799232	-1	protein_coding	1122	CHML	0.00115778	1.342076085	0	0	0	NA	NA	NA	NA	Yes	Mesenchymal_Stem_Cell	rs2168812
ENSG00000174371	EXO1	1	242011269	242058450	1	protein_coding	9156	EXO1	9.25485E-09	0.798256142	0	0	0	NA	NA	NA	NA	Yes	Mesenchymal_Stem_Cell	rs2168812
ENSG00000180287	PLD5	1	242246288	242687998	-1	protein_coding	200150	PLD5	0.124197737	NA	0	0	0	NA	NA	NA	NA	Yes	hESC	rs2168812
ENSG00000054282	SDCCAG8	1	243419320	243663394	1	protein_coding	10806	SDCCAG8	1.32893E-07	-0.422227426	0	0	35	2.95E-12	2.33E-05	BIOS_eQTL_geneLevel	+	No	NA	rs2168812
ENSG00000117020	AKT3	1	243651535	244014381	-1	protein_coding	10000	AKT3	0.999585399	-1.497672407	3	17.87	109	5.78E-19	1.27E-03	BIOS_eQTL_geneLevel	+	Yes	Mesenchymal_Stem_Cell	rs2168812
ENSG00000179456	ZBTB18	1	244214585	244220778	1	protein_coding	10472	ZBTB18	0.970123549	-0.604927363	0	0	0	NA	NA	NA	NA	Yes	Hippocampus:Mesenchymal_Stem_Cell:Mesendoderm:Neural_Progenitor_Cell:hESC	rs2168812
ENSG00000268146	AL590483.1	1	244227632	244231211	1	protein_coding	NA	NA	NA	NA	0	0	0	NA	NA	NA	NA	Yes	Hippocampus:Mesenchymal_Stem_Cell:Mesendoderm:Neural_Progenitor_Cell:hESC	rs2168812
ENSG00000173728	C1orf100	1	244515937	244552965	1	protein_coding	200159	C1orf100	3.53989E-08	-0.225046757	0	0	0	NA	NA	NA	NA	Yes	Mesenchymal_Stem_Cell:Mesendoderm:hESC	rs2168812
ENSG00000035687	ADSS	1	244571796	244615436	-1	protein_coding	159	ADSS	0.822870228	-0.514646996	0	0	0	NA	NA	NA	NA	Yes	Mesenchymal_Stem_Cell:Mesendoderm	rs2168812
ENSG00000179397	C1orf101	1	244617679	244804479	1	protein_coding	257044	C1orf101	5.88681E-07	-0.466874832	0	0	0	NA	NA	NA	NA	Yes	Mesenchymal_Stem_Cell:Mesendoderm	rs2168812
ENSG00000115750	TAF1B	2	9983483	10074545	1	protein_coding	9014	TAF1B	4.28699E-06	0.166580018	0	0	0	NA	NA	NA	NA	Yes	Mesenchymal_Stem_Cell	rs4513262
ENSG00000134317	GRHL1	2	10085341	10142411	1	protein_coding	29841	GRHL1	0.983150779	0.379803336	0	0	0	NA	NA	NA	NA	Yes	Mesenchymal_Stem_Cell:Mesendoderm	rs4513262
ENSG00000172059	KLF11	2	10182976	10194963	1	protein_coding	8462	KLF11	0.00111669	-0.421281973	1	17.22	17	1.30E-07	8.31E-05	BIOS_eQTL_geneLevel	+	No	NA	rs4513262
ENSG00000115758	ODC1	2	10580094	10588630	-1	protein_coding	4953	ODC1	0.950802103	NA	0	0	0	NA	NA	NA	NA	Yes	Mesenchymal_Stem_Cell	rs4513262
ENSG00000152284	TCF7L1	2	85360533	85537511	1	protein_coding	83439	TCF7L1	0.75375201	NA	1	24.3	0	NA	NA	NA	NA	Yes	Mesenchymal_Stem_Cell:Mesendoderm:hESC	rs41288837
ENSG00000168906	MAT2A	2	85766288	85772403	1	protein_coding	4144	MAT2A	0.733230032	-1.056808714	0	0	0	NA	NA	NA	NA	Yes	Mesenchymal_Stem_Cell:Mesendoderm:hESC	rs41288837
ENSG00000115486	GGCX	2	85771846	85788670	-1	protein_coding	2677	GGCX	1.19798E-08	-0.045096532	0	0	0	NA	NA	NA	NA	Yes	Mesenchymal_Stem_Cell:Mesendoderm:hESC	rs41288837
ENSG00000118640	VAMP8	2	85788685	85809154	1	protein_coding	8673	VAMP8	0.270489594	-0.056335469	0	0	0	NA	NA	NA	NA	Yes	Mesenchymal_Stem_Cell:Mesendoderm:hESC	rs41288837
ENSG00000168899	VAMP5	2	85811531	85820535	1	protein_coding	10791	VAMP5	0.051619746	0.554615104	0	0	0	NA	NA	NA	NA	Yes	Mesenchymal_Stem_Cell:Mesendoderm	rs41288837
ENSG00000168894	RNF181	2	85822848	85824736	1	protein_coding	51255	RNF181	3.13992E-09	-0.10549856	0	0	0	NA	NA	NA	NA	Yes	Mesenchymal_Stem_Cell:Mesendoderm	rs41288837
ENSG00000168890	TMEM150A	2	85825671	85830319	-1	protein_coding	129303	TMEM150A	0.145714084	-0.552878007	0	0	0	NA	NA	NA	NA	Yes	Mesenchymal_Stem_Cell:Mesendoderm	rs41288837
ENSG00000168883	USP39	2	85829979	85876403	1	protein_coding	10713	USP39	0.031607796	-0.577551893	0	0	0	NA	NA	NA	NA	Yes	Mesenchymal_Stem_Cell:Mesendoderm	rs41288837
ENSG00000168887	C2orf68	2	85833777	85839189	-1	protein_coding	388969	C2orf68	0.012486499	-1.341556673	0	0	0	NA	NA	NA	NA	Yes	Mesenchymal_Stem_Cell:Mesendoderm	rs41288837
ENSG00000204525	HLA-C	6	31236526	31239907	-1	protein_coding	3107	HLA-C	9.94564E-10	8.44188637	0	0	9	4.30E-06	4.11E-23	GTEx_v7_Brain_Cerebellar_Hemisphere:GTEx_v7_Brain_Spinal_cord_cervical_c-1:GTEx_v6_Whole_Blood	+	No	NA	rs429150;rs3134953
ENSG00000206344	HCG27	6	31165537	31171745	1	protein_coding	253018	HCG27	NA	NA	0	0	48	7.60E-10	4.05E-12	GTEx_v7_Cells_EBV-transformed_lymphocytes:GTEx_v7_Whole_Blood:GTEx_v7_Brain_Caudate_basal_ganglia:GTEx_v7_Brain_Cerebellar_Hemisphere:GTEx_v7_Brain_Cerebellum:GTEx_v7_Brain_Nucleus_accumbens_basal_ganglia:GTEx_v7_Brain_Putamen_basal_ganglia:GTEx_v6_Cells_EBV-transformed_lymphocytes:GTEx_v6_Brain_Caudate_basal_ganglia:CRBL	-	No	NA	rs3134953;rs9271147
ENSG00000234745	HLA-B	6	31321649	31324965	-1	protein_coding	3106	HLA-B	0.002664635	10.62525401	0	0	9	1.54E-23	3.34E-04	GTEx_v7_Brain_Caudate_basal_ganglia:GTEx_v7_Brain_Frontal_Cortex_BA9:GTEx_v6_Whole_Blood:BIOS_eQTL_geneLevel	+	No	NA	rs3134953;rs9271147
ENSG00000204498	NFKBIL1	6	31514647	31526606	1	protein_coding	4795	NFKBIL1	0.81664717	0.117968443	0	0	2	2.30E-05	4.28E-02	GTEx_v7_Brain_Cerebellum	-	No	NA	rs3134953;rs9271147
ENSG00000206344	HCG27	6	31165537	31171745	1	protein_coding	253018	HCG27	NA	NA	0	0	48	7.60E-10	4.05E-12	GTEx_v7_Cells_EBV-transformed_lymphocytes:GTEx_v7_Whole_Blood:GTEx_v7_Brain_Caudate_basal_ganglia:GTEx_v7_Brain_Cerebellar_Hemisphere:GTEx_v7_Brain_Cerebellum:GTEx_v7_Brain_Nucleus_accumbens_basal_ganglia:GTEx_v7_Brain_Putamen_basal_ganglia:GTEx_v6_Cells_EBV-transformed_lymphocytes:GTEx_v6_Brain_Caudate_basal_ganglia:CRBL	-	No	NA	rs3134953;rs9271147
ENSG00000234745	HLA-B	6	31321649	31324965	-1	protein_coding	3106	HLA-B	0.002664635	10.62525401	0	0	9	1.54E-23	3.34E-04	GTEx_v7_Brain_Caudate_basal_ganglia:GTEx_v7_Brain_Frontal_Cortex_BA9:GTEx_v6_Whole_Blood:BIOS_eQTL_geneLevel	+	No	NA	rs3134953;rs9271147
ENSG00000204498	NFKBIL1	6	31514647	31526606	1	protein_coding	4795	NFKBIL1	0.81664717	0.117968443	0	0	2	2.30E-05	4.28E-02	GTEx_v7_Brain_Cerebellum	-	No	NA	rs3134953;rs9271147
ENSG00000240053	LY6G5B	6	31637944	31641553	1	protein_coding	58496	LY6G5B	0.000871194	0.370528481	0	0	45	4.08E-21	2.83E-10	GTEx_v7_Whole_Blood:GTEx_v7_Brain_Cerebellum:GTEx_v7_Brain_Frontal_Cortex_BA9:BIOS_eQTL_geneLevel	+	Yes	Mesenchymal_Stem_Cell	rs3134953;rs9271147
ENSG00000213722	DDAH2	6	31694815	31698394	-1	protein_coding	23564	DDAH2	0.842139471	-0.370986151	0	0	43	6.96E-49	2.15E-03	GTEx_v7_Whole_Blood:BIOS_eQTL_geneLevel	+	Yes	Mesenchymal_Stem_Cell	rs3134953;rs9271147
ENSG00000204390	HSPA1L	6	31777396	31783437	-1	protein_coding	3305	HSPA1L	2.19041E-06	-0.112850149	0	0	15	1.02E-05	4.27E-02	GTEx_v7_Brain_Cerebellum	+	Yes	Mesenchymal_Stem_Cell	rs3134953;rs9271147
ENSG00000243649	CFB	6	31895475	31919861	1	protein_coding	629	CFB	0.000978859	-0.355687014	0	0	21	1.17E-05	3.54E-02	GTEx_v7_Brain_Hypothalamus:BIOS_eQTL_geneLevel	+	No	NA	rs429150;rs4412247;rs9271147
ENSG00000204351	SKIV2L	6	31926857	31937532	1	protein_coding	6499	SKIV2L	1.11012E-15	-0.360100754	0	0	39	2.19E-12	6.03E-06	BIOS_eQTL_geneLevel	-	No	NA	rs429150;rs3134953;rs9271147
ENSG00000244731	C4A	6	31949801	31970458	1	protein_coding	720	C4A	NA	-0.318571861	0	0	44	8.96E-38	7.75E-14	GTEx_v7_Whole_Blood:GTEx_v7_Brain_Cerebellum:BIOS_eQTL_geneLevel	+	No	NA	rs429150;rs3134953;rs9271147
ENSG00000224389	C4B	6	31982539	32003195	1	protein_coding	721	C4B	NA	-0.318571861	0	0	70	3.74E-31	2.12E-13	GTEx_v7_Whole_Blood:GTEx_v6_Cells_EBV-transformed_lymphocytes:GTEx_v6_Whole_Blood:BIOS_eQTL_geneLevel	+	No	NA	rs429150;rs3134953;rs9271147
ENSG00000231852	CYP21A2	6	32006042	32009447	1	protein_coding	1589	CYP21A2	0.672306731	0.394527384	0	0	47	2.13E-25	1.46E-06	GTEx_v7_Brain_Cerebellum:GTEx_v7_Brain_Hypothalamus:BIOS_eQTL_geneLevel	-	No	NA	rs429150;rs3134953;rs9271147
ENSG00000168477	TNXB	6	32008931	32083111	-1	protein_coding	7148	TNXB	0.774153752	-0.827100611	0	0	56	4.59E-85	6.10E-06	BIOS_eQTL_geneLevel	-	No	NA	rs429150;rs3134953;rs9271147
ENSG00000221988	PPT2	6	32121218	32134011	1	protein_coding	9374	PPT2	0.772683335	-0.617996897	2	16.19	26	2.87E-06	2.16E-03	BIOS_eQTL_geneLevel	+	No	NA	rs429150;rs3134953;rs9271147
ENSG00000258388	PPT2-EGFL8	6	32121622	32139755	1	protein_coding	100532746	PPT2-EGFL8	NA	NA	2	16.19	64	3.92E-09	5.99E-06	BIOS_eQTL_geneLevel	+	No	NA	rs429150;rs3134953;rs9271147
ENSG00000241404	EGFL8	6	32132360	32136058	1	protein_coding	80864	EGFL8	3.51577E-06	0.257303684	1	16.19	64	3.92E-09	5.99E-06	BIOS_eQTL_geneLevel	+	No	NA	rs429150;rs3134953;rs9271147
ENSG00000204308	RNF5	6	32146131	32151930	1	protein_coding	6048	RNF5	0.002990424	0.006814174	0	0	81	1.66E-08	2.33E-05	BIOS_eQTL_geneLevel	+	No	NA	rs3134953;rs4412247;rs9271147
ENSG00000204305	AGER	6	32148745	32152101	-1	protein_coding	177	AGER	1.46448E-10	-0.301868651	0	0	48	2.80E-09	6.04E-06	BIOS_eQTL_geneLevel	-	No	NA	rs3134953;rs9271147
ENSG00000213654	GPSM3	6	32158543	32163300	-1	protein_coding	63940	GPSM3	0.609591628	-0.739905355	0	0	25	1.27E-10	6.19E-06	BIOS_eQTL_geneLevel	+	No	NA	rs429150;rs3134953;rs9271147
ENSG00000204301	NOTCH4	6	32162620	32191844	-1	protein_coding	4855	NOTCH4	1.19532E-10	0.011318569	0	0	97	1.85E-16	6.19E-06	GTEx_v7_Brain_Cerebellum:BIOS_eQTL_geneLevel	+	No	NA	rs429150;rs3134953;rs9268766;rs9271147
ENSG00000204290	BTNL2	6	32361740	32374905	-1	protein_coding	56244	BTNL2	2.02726E-07	NA	0	0	28	1.14E-09	6.16E-06	BIOS_eQTL_geneLevel	+	Yes	Mesenchymal_Stem_Cell:Mesendoderm:Neural_Progenitor_Cell:hESC	rs3134953;rs4412247;rs9268766;rs9271147
ENSG00000204287	HLA-DRA	6	32407619	32412823	1	protein_coding	3122	HLA-DRA	0.70016489	2.607293214	0	0	15	2.09E-07	1.37E-04	BIOS_eQTL_geneLevel	+	Yes	Mesenchymal_Stem_Cell:Mesendoderm:Neural_Progenitor_Cell:hESC	rs3134953;rs4412247;rs9268766;rs9271147
ENSG00000198502	HLA-DRB5	6	32485120	32498064	-1	protein_coding	3127	HLA-DRB5	0.003227266	NA	1	12.45	711	8.63E-218	1.30E-52	GTEx_v7_Cells_EBV-transformed_lymphocytes:GTEx_v7_Whole_Blood:GTEx_v7_Brain_Amygdala:GTEx_v7_Brain_Anterior_cingulate_cortex_BA24:GTEx_v7_Brain_Caudate_basal_ganglia:GTEx_v7_Brain_Cerebellar_Hemisphere:GTEx_v7_Brain_Cerebellum:GTEx_v7_Brain_Cortex:GTEx_v7_Brain_Frontal_Cortex_BA9:GTEx_v7_Brain_Hippocampus:GTEx_v7_Brain_Hypothalamus:GTEx_v7_Brain_Nucleus_accumbens_basal_ganglia:GTEx_v7_Brain_Putam…	+	Yes	Neural_Progenitor_Cell	rs3134953;rs4412247;rs9271147;rs9268766
ENSG00000196126	HLA-DRB1	6	32546546	32557625	-1	protein_coding	3123	HLA-DRB1	5.62353E-05	10.15439656	0	0	735	1.17E-163	2.69E-14	GTEx_v7_Whole_Blood:GTEx_v7_Brain_Anterior_cingulate_cortex_BA24:GTEx_v7_Brain_Caudate_basal_ganglia:GTEx_v7_Brain_Cerebellar_Hemisphere:GTEx_v7_Brain_Cerebellum:GTEx_v7_Brain_Cortex:GTEx_v7_Brain_Frontal_Cortex_BA9:GTEx_v7_Brain_Nucleus_accumbens_basal_ganglia:GTEx_v7_Brain_Putamen_basal_ganglia:GTEx_v6_Cells_EBV-transformed_lymphocytes:GTEx_v6_Whole_Blood:GTEx_v6_Brain_Anterior_cingulate_cortex…	+	Yes	Mesenchymal_Stem_Cell:Mesendoderm:Neural_Progenitor_Cell:hESC	rs3134953;rs4412247;rs9268766;rs9271147;rs429150
ENSG00000196735	HLA-DQA1	6	32595956	32614839	1	protein_coding	3117	HLA-DQA1	0.16662533	NA	0	0	642	1.66E-161	2.35E-29	GTEx_v7_Cells_EBV-transformed_lymphocytes:GTEx_v7_Whole_Blood:GTEx_v7_Brain_Caudate_basal_ganglia:GTEx_v7_Brain_Cortex:GTEx_v6_Cells_EBV-transformed_lymphocytes:GTEx_v6_Whole_Blood:GTEx_v6_Brain_Anterior_cingulate_cortex_BA24:GTEx_v6_Brain_Caudate_basal_ganglia:GTEx_v6_Brain_Cerebellar_Hemisphere:GTEx_v6_Brain_Cerebellum:GTEx_v6_Brain_Cortex:GTEx_v6_Brain_Frontal_Cortex_BA9:GTEx_v6_Brain_Hippocam…	+	Yes	Mesendoderm:hESC	rs3134953;rs4412247;rs9271147;rs9268766
ENSG00000179344	HLA-DQB1	6	32627244	32636160	-1	protein_coding	3119	HLA-DQB1	0.353015152	22.53546394	0	0	731	3.27167000000001e-310	5.30E-78	GTEx_v7_Cells_EBV-transformed_lymphocytes:GTEx_v7_Whole_Blood:GTEx_v7_Brain_Amygdala:GTEx_v7_Brain_Anterior_cingulate_cortex_BA24:GTEx_v7_Brain_Caudate_basal_ganglia:GTEx_v7_Brain_Cerebellar_Hemisphere:GTEx_v7_Brain_Cerebellum:GTEx_v7_Brain_Cortex:GTEx_v7_Brain_Hippocampus:GTEx_v7_Brain_Hypothalamus:GTEx_v7_Brain_Nucleus_accumbens_basal_ganglia:GTEx_v7_Brain_Putamen_basal_ganglia:GTEx_v7_Brain_Sp…	+	Yes	Mesenchymal_Stem_Cell:Mesendoderm:hESC	rs3134953;rs4412247;rs9268766;rs9271147;rs429150
ENSG00000237541	HLA-DQA2	6	32709119	32714992	1	protein_coding	3118	HLA-DQA2	0.005044064	3.372505394	0	0	714	3.27167000000001e-310	2.69E-60	GTEx_v7_Cells_EBV-transformed_lymphocytes:GTEx_v7_Whole_Blood:GTEx_v7_Brain_Amygdala:GTEx_v7_Brain_Anterior_cingulate_cortex_BA24:GTEx_v7_Brain_Caudate_basal_ganglia:GTEx_v7_Brain_Cerebellar_Hemisphere:GTEx_v7_Brain_Cerebellum:GTEx_v7_Brain_Cortex:GTEx_v7_Brain_Frontal_Cortex_BA9:GTEx_v7_Brain_Hippocampus:GTEx_v7_Brain_Hypothalamus:GTEx_v7_Brain_Nucleus_accumbens_basal_ganglia:GTEx_v7_Brain_Putam…	-	Yes	Mesenchymal_Stem_Cell:Mesendoderm:hESC	rs3134953;rs4412247;rs9268766;rs9271147;rs429150
ENSG00000232629	HLA-DQB2	6	32723875	32731311	-1	protein_coding	3120	HLA-DQB2	0.009355929	2.056435658	0	0	650	3.27167000000001e-310	4.34E-71	GTEx_v7_Cells_EBV-transformed_lymphocytes:GTEx_v7_Whole_Blood:GTEx_v7_Brain_Caudate_basal_ganglia:GTEx_v7_Brain_Cerebellar_Hemisphere:GTEx_v7_Brain_Cerebellum:GTEx_v7_Brain_Cortex:GTEx_v7_Brain_Frontal_Cortex_BA9:GTEx_v7_Brain_Hippocampus:GTEx_v7_Brain_Hypothalamus:GTEx_v7_Brain_Nucleus_accumbens_basal_ganglia:GTEx_v7_Brain_Putamen_basal_ganglia:GTEx_v7_Brain_Substantia_nigra:GTEx_v6_Cells_EBV-tr…	-	Yes	Mesenchymal_Stem_Cell:Mesendoderm:hESC	rs3134953;rs4412247;rs9268766;rs9271147;rs429150
ENSG00000241106	HLA-DOB	6	32780540	32784825	-1	protein_coding	3112	HLA-DOB	9.08752E-05	1.309429378	0	0	33	1.68E-18	5.97E-06	BIOS_eQTL_geneLevel:HIPP	-	Yes	Dorsolateral_Prefrontal_Cortex:Hippocampus:Mesenchymal_Stem_Cell:Mesendoderm:Neural_Progenitor_Cell:hESC	rs429150;rs3134953;rs4412247;rs9268766;rs9271147
ENSG00000250264	TAP2	6	32781544	32806599	-1	protein_coding	6891	NA	NA	1.687231754	0	0	40	5.46E-37	5.97E-06	BIOS_eQTL_geneLevel:HIPP	-	Yes	Mesenchymal_Stem_Cell:Mesendoderm	rs3134953;rs4412247;rs9271147;rs429150;rs9268766
ENSG00000204267	TAP2	6	32789610	32806557	-1	protein_coding	6891	TAP2	0.001713418	1.687231754	0	0	148	5.46E-37	5.97E-06	BIOS_eQTL_geneLevel:HIPP	+	Yes	Mesenchymal_Stem_Cell:Mesendoderm	rs3134953;rs4412247;rs9271147;rs429150;rs9268766
ENSG00000204264	PSMB8	6	32808494	32812480	-1	protein_coding	5696	PSMB8	0.012003172	-0.438662555	0	0	1	1.15E-05	7.80E-03	BIOS_eQTL_geneLevel	-	Yes	Mesenchymal_Stem_Cell:Mesendoderm	rs3134953;rs4412247;rs9271147
ENSG00000240065	PSMB9	6	32811913	32827362	1	protein_coding	5698	PSMB9	0.225647028	0.23556357	0	0	17	2.13E-12	3.34E-04	GTEx_v7_Brain_Cerebellum:GTEx_v6_Whole_Blood:BIOS_eQTL_geneLevel	-	Yes	Mesenchymal_Stem_Cell:Mesendoderm	rs3134953;rs4412247;rs9271147;rs9268766
ENSG00000168394	TAP1	6	32812986	32821755	-1	protein_coding	6890	TAP1	0.286650163	0.342218619	0	0	0	NA	NA	NA	NA	Yes	Mesenchymal_Stem_Cell:Mesendoderm	rs3134953;rs4412247;rs9271147
ENSG00000242574	HLA-DMB	6	32902406	32908847	-1	protein_coding	3109	HLA-DMB	0.004905106	0.554261301	0	0	0	NA	NA	NA	NA	Yes	Mesenchymal_Stem_Cell:Mesendoderm:hESC	rs3134953;rs4412247;rs9271147
ENSG00000248993	XXbac-BPG181M17.5	6	32905141	32920899	-1	protein_coding	NA	NA	NA	NA	0	0	0	NA	NA	NA	NA	Yes	Mesenchymal_Stem_Cell:Mesendoderm:hESC	rs429150;rs3134953;rs4412247;rs9268766;rs9271147
ENSG00000204257	HLA-DMA	6	32916390	32936871	-1	protein_coding	3108	HLA-DMA	0.687977633	0.302076019	0	0	0	NA	NA	NA	NA	Yes	Mesenchymal_Stem_Cell:Mesendoderm:hESC	rs429150;rs3134953;rs4412247;rs9268766;rs9271147
ENSG00000204256	BRD2	6	32936437	32949282	1	protein_coding	6046	BRD2	0.99953088	1.252742505	0	0	0	NA	NA	NA	NA	Yes	Mesenchymal_Stem_Cell:Mesendoderm:hESC	rs429150;rs3134953;rs4412247;rs9268766;rs9271147
ENSG00000231389	HLA-DPA1	6	33032346	33048552	-1	protein_coding	3113	HLA-DPA1	0.000185717	6.047824288	0	0	10	5.79E-04	2.64E-02	FCTX:aveALL	NA	Yes	Mesenchymal_Stem_Cell	rs3134953;rs4412247;rs9271147
ENSG00000223865	HLA-DPB1	6	33043703	33054978	1	protein_coding	3115	HLA-DPB1	7.18466E-09	7.10367917	0	0	1	7.47E-04	2.17E-02	OCTX	NA	Yes	Mesenchymal_Stem_Cell	rs3134953;rs4412247;rs9271147
ENSG00000204387	C6orf48	6	31802385	31807541	1	protein_coding	50854	C6orf48	5.82447E-05	-0.070683339	0	0	32	1.21E-16	5.97E-06	GTEx_v7_Brain_Cerebellum:BIOS_eQTL_geneLevel	+	Yes	Mesenchymal_Stem_Cell	rs3134953;rs429150;rs9268766
ENSG00000204385	SLC44A4	6	31830969	31846823	-1	protein_coding	80736	SLC44A4	8.2783E-08	0.141294682	0	0	6	1.54E-05	1.01E-02	BIOS_eQTL_geneLevel	+	Yes	Mesenchymal_Stem_Cell	rs3134953;rs429150
ENSG00000244255	CFB	6	31895475	31919825	1	protein_coding	629	NA	NA	-0.355687014	0	0	5	6.21E-05	3.54E-02	BIOS_eQTL_geneLevel	+	No	NA	rs429150
ENSG00000268923	AL645922.1	6	31973945	31974881	-1	protein_coding	NA	NA	NA	NA	0	0	14	1.91E-38	1.94E-02	BIOS_eQTL_geneLevel	-	No	NA	rs429150;rs3134953
ENSG00000204304	PBX2	6	32152512	32157963	-1	protein_coding	5089	PBX2	0.889707316	-0.473697655	0	0	7	1.17E-07	8.34E-05	BIOS_eQTL_geneLevel	-	No	NA	rs429150
ENSG00000111907	TPD52L1	6	125440195	125585553	1	protein_coding	7164	TPD52L1	0.008420056	0.000949749	0	0	0	NA	NA	NA	NA	Yes	Mesenchymal_Stem_Cell:Mesendoderm:hESC	rs11154343;rs4897175;rs1490384;rs4273712;rs1262476;rs12199006;rs9375477;rs9491675;rs17650496;rs1930939
ENSG00000111906	HDDC2	6	125541108	125623282	-1	protein_coding	51020	HDDC2	0.001273362	1.384190121	0	0	0	NA	NA	NA	NA	Yes	Mesendoderm:hESC	rs11154343
ENSG00000066651	TRMT11	6	126307576	126360422	1	protein_coding	60487	TRMT11	8.2383E-06	-0.442120443	0	0	3	2.88E-09	5.73E-06	GTEx_v7_Brain_Cerebellar_Hemisphere:GTEx_v7_Brain_Cerebellum:BIOS_eQTL_geneLevel	-	Yes	Mesenchymal_Stem_Cell:Mesendoderm:Neural_Progenitor_Cell:hESC	rs11154343;rs1490384;rs4273712;rs1262476;rs12199006;rs9375477;rs9491675;rs17650496;rs1930939;rs1936791
ENSG00000203760	CENPW	6	126661320	126670021	1	protein_coding	387103	CENPW	0.500136307	-0.442381075	0	0	0	NA	NA	NA	NA	Yes	Mesenchymal_Stem_Cell:Mesendoderm:hESC	rs11154343;rs1490384;rs1262476;rs12199006;rs9375477;rs9491675;rs17650496;rs1930939;rs1936791
ENSG00000146374	RSPO3	6	127439749	127518910	1	protein_coding	84870	RSPO3	0.043976319	NA	0	0	0	NA	NA	NA	NA	Yes	Mesenchymal_Stem_Cell:Mesendoderm:Neural_Progenitor_Cell:hESC	rs11154343;rs4897175;rs1490384;rs4273712;rs1262476;rs12199006;rs9375477;rs9491675;rs17650496;rs1930939
ENSG00000118518	RNF146	6	127587755	127609712	1	protein_coding	81847	RNF146	0.445213313	-0.181264613	0	0	0	NA	NA	NA	NA	Yes	Mesenchymal_Stem_Cell:Mesendoderm:hESC	rs11154343;rs4897175;rs1490384;rs1262476;rs12199006;rs9375477;rs9491675;rs1930939
ENSG00000093144	ECHDC1	6	127609855	127664754	-1	protein_coding	55862	ECHDC1	6.03175E-05	0.227821385	0	0	0	NA	NA	NA	NA	Yes	Mesenchymal_Stem_Cell:Mesendoderm:hESC	rs11154343;rs1490384;rs4273712;rs1262476;rs12199006;rs9375477;rs9491675;rs17650496;rs1930939
ENSG00000214338	SOGA3	6	127759551	127840500	-1	protein_coding	387104	SOGA3	NA	0.147040609	0	0	0	NA	NA	NA	NA	Yes	Mesenchymal_Stem_Cell:Mesendoderm:hESC	rs11154343;rs4897175;rs1490384;rs4273712;rs1262476;rs12199006;rs9375477;rs9491675;rs17650496;rs1930939
ENSG00000255330	SOGA3	6	127759551	127840146	-1	protein_coding	387104	NA	NA	0.147040609	0	0	0	NA	NA	NA	NA	Yes	Mesenchymal_Stem_Cell:Mesendoderm:hESC	rs11154343;rs4897175;rs1490384;rs4273712;rs1262476;rs12199006;rs9375477;rs9491675;rs17650496;rs1930939
ENSG00000189367	KIAA0408	6	127761488	127780536	-1	protein_coding	9729	KIAA0408	1.95786E-06	-0.410960782	0	0	2	2.92E-05	2.80E-02	CRBL	NA	Yes	Mesenchymal_Stem_Cell:Mesendoderm:hESC	rs11154343;rs17650496
ENSG00000184530	C6orf58	6	127840600	127912962	1	protein_coding	352999	C6orf58	1.61256E-10	0.187402208	0	0	0	NA	NA	NA	NA	Yes	Mesenchymal_Stem_Cell:Mesendoderm	rs11154343
ENSG00000105778	AVL9	7	32535038	33078516	1	protein_coding	23080	AVL9	0.000325495	0.605377612	1	14.34	7	1.85E-05	1.20E-02	BIOS_eQTL_geneLevel	-	No	NA	rs7808664
ENSG00000170852	KBTBD2	7	32907784	32933743	-1	protein_coding	25948	KBTBD2	0.991275949	-0.090729293	1	14.34	33	1.22E-150	2.22E-08	GTEx_v7_Whole_Blood:GTEx_v7_Brain_Cerebellum:GTEx_v6_Whole_Blood:BIOS_eQTL_geneLevel	-	Yes	Mesenchymal_Stem_Cell	rs7808664
ENSG00000122642	FKBP9	7	32997017	33046543	1	protein_coding	11328	FKBP9	0.072366214	1.208188864	0	0	30	3.36E-42	1.69E-08	GTEx_v7_Brain_Cerebellar_Hemisphere:GTEx_v7_Brain_Cerebellum:GTEx_v6_Whole_Blood:GTEx_v6_Brain_Cerebellar_Hemisphere:BIOS_eQTL_geneLevel	+	Yes	Mesenchymal_Stem_Cell	rs7808664
ENSG00000122643	NT5C3A	7	33053742	33102409	-1	protein_coding	51251	NT5C3A	0.012372194	-0.233355514	0	0	0	NA	NA	NA	NA	Yes	Mesenchymal_Stem_Cell:Mesendoderm:hESC	rs7808664
ENSG00000164610	RP9	7	33134409	33149013	-1	protein_coding	6100	RP9	0.174162978	NA	0	0	20	3.70E-08	3.06E-04	GTEx_v7_Brain_Caudate_basal_ganglia	-	Yes	Mesenchymal_Stem_Cell:Mesendoderm	rs7808664
ENSG00000122507	BBS9	7	33168856	33645680	1	protein_coding	27241	BBS9	6.37524E-10	0.196307887	0	0	0	NA	NA	NA	NA	Yes	Mesenchymal_Stem_Cell	rs7808664
ENSG00000108039	XPNPEP1	10	111624524	111683311	-1	protein_coding	7511	XPNPEP1	0.964214097	NA	0	0	0	NA	NA	NA	NA	Yes	Mesenchymal_Stem_Cell:Mesendoderm	rs148974918
ENSG00000203876	RP11-451M19.3	10	111701029	111713649	-1	protein_coding	NA	NA	NA	NA	0	0	0	NA	NA	NA	NA	Yes	Mesenchymal_Stem_Cell:Mesendoderm	rs148974918
ENSG00000148700	ADD3	10	111756126	111895323	1	protein_coding	120	ADD3	0.952357437	NA	0	0	0	NA	NA	NA	NA	Yes	Mesenchymal_Stem_Cell	rs148974918
ENSG00000119950	MXI1	10	111967363	112047123	1	protein_coding	4601	MXI1	0.707739926	-0.185887657	0	0	0	NA	NA	NA	NA	Yes	Mesenchymal_Stem_Cell:Mesendoderm:hESC	rs148974918
ENSG00000119953	SMNDC1	10	112050488	112064709	-1	protein_coding	10285	SMNDC1	0.275797515	-0.894320024	0	0	0	NA	NA	NA	NA	Yes	Mesenchymal_Stem_Cell:Mesendoderm:hESC	rs148974918
ENSG00000108055	SMC3	10	112327449	112364394	1	protein_coding	9126	SMC3	0.999999999	-0.438873875	0	0	0	NA	NA	NA	NA	Yes	Mesenchymal_Stem_Cell:Mesendoderm:hESC	rs148974918
ENSG00000214413	BBIP1	10	112658488	112679032	-1	protein_coding	92482	BBIP1	NA	0.391521582	0	0	0	NA	NA	NA	NA	Yes	Mesenchymal_Stem_Cell:Mesendoderm:hESC	rs148974918
ENSG00000108061	SHOC2	10	112679301	112773425	1	protein_coding	8036	SHOC2	0.991705192	-0.040178482	0	0	0	NA	NA	NA	NA	Yes	Mesenchymal_Stem_Cell:Mesendoderm:hESC	rs148974918
ENSG00000078237	C12orf5	12	4430371	4462338	1	protein_coding	57103	C12orf5	0.691296681	NA	0	0	1	6.43E-06	4.52E-03	BIOS_eQTL_geneLevel	-	No	NA	rs3217870
ENSG00000165682	CLEC1B	12	10138241	10166023	-1	protein_coding	51266	CLEC1B	0.000104171	0.402766094	0	0	0	NA	NA	NA	NA	Yes	Mesenchymal_Stem_Cell	rs2066827
ENSG00000256660	CLEC12B	12	10163226	10171218	1	protein_coding	387837	CLEC12B	0.000124716	0.601707009	0	0	0	NA	NA	NA	NA	Yes	Mesenchymal_Stem_Cell	rs2066827
ENSG00000197992	CLEC9A	12	10183276	10218565	1	protein_coding	283420	CLEC9A	2.45378E-05	0.238605084	0	0	0	NA	NA	NA	NA	Yes	Mesenchymal_Stem_Cell	rs2066827
ENSG00000121335	PRB2	12	11544476	11653975	-1	protein_coding	653247	PRB2	2.87656E-14	0.22843617	0	0	0	NA	NA	NA	NA	Yes	hESC	rs2066827
ENSG00000139083	ETV6	12	11802788	12048336	1	protein_coding	2120	ETV6	0.99522782	1.935972876	0	0	0	NA	NA	NA	NA	Yes	Mesenchymal_Stem_Cell	rs2066827
ENSG00000121380	BCL2L14	12	12202778	12364018	1	protein_coding	79370	BCL2L14	0.143123586	-0.122877895	0	0	0	NA	NA	NA	NA	Yes	Mesenchymal_Stem_Cell:Mesendoderm:hESC	rs2066827
ENSG00000111261	MANSC1	12	12482198	12503475	-1	protein_coding	54682	MANSC1	0.000352736	-0.129891379	0	0	0	NA	NA	NA	NA	Yes	Mesenchymal_Stem_Cell:Mesendoderm:hESC	rs2066827
ENSG00000205791	LOH12CR2	12	12508342	12510001	-1	protein_coding	503693	LOH12CR2	NA	NA	0	0	0	NA	NA	NA	NA	Yes	Mesenchymal_Stem_Cell:Mesendoderm:hESC	rs2066827
ENSG00000165714	LOH12CR1	12	12510013	12619840	1	protein_coding	118426	LOH12CR1	0.021632085	1.386790687	0	0	0	NA	NA	NA	NA	Yes	Mesenchymal_Stem_Cell:Mesendoderm:hESC	rs2066827
ENSG00000111266	DUSP16	12	12628829	12715317	-1	protein_coding	80824	DUSP16	0.112697836	-0.455489112	0	0	0	NA	NA	NA	NA	Yes	Mesendoderm:hESC	rs2066827
ENSG00000174292	TNK1	17	7283853	7293093	1	protein_coding	8711	TNK1	8.54609E-05	-0.435656686	0	0	0	NA	NA	NA	NA	Yes	Mesenchymal_Stem_Cell	rs78378222;rs35850753
ENSG00000187838	TMEM256-PLSCR3	17	7293046	7307416	-1	protein_coding	57048	TMEM256-PLSCR3	0.245307294	NA	0	0	0	NA	NA	NA	NA	Yes	Mesenchymal_Stem_Cell	rs78378222;rs35850753
ENSG00000262481	C17orf61-PLSCR3	17	7293053	7307416	-1	protein_coding	100529211	NA	NA	NA	0	0	0	NA	NA	NA	NA	Yes	Mesenchymal_Stem_Cell	rs78378222;rs35850753
ENSG00000205544	TMEM256	17	7306294	7307456	-1	protein_coding	254863	TMEM256	2.94821E-05	-0.394808777	0	0	0	NA	NA	NA	NA	Yes	Mesenchymal_Stem_Cell	rs78378222;rs35850753
ENSG00000169992	NLGN2	17	7308193	7323179	1	protein_coding	57555	NLGN2	0.9926247	-0.095465965	0	0	0	NA	NA	NA	NA	Yes	Mesenchymal_Stem_Cell	rs78378222;rs35850753
ENSG00000174282	ZBTB4	17	7362685	7387582	-1	protein_coding	57659	ZBTB4	0.998490203	-0.565704482	0	0	0	NA	NA	NA	NA	Yes	Mesenchymal_Stem_Cell:Mesendoderm	rs78378222;rs35850753
ENSG00000259224	SLC35G6	17	7384721	7386383	1	protein_coding	643664	SLC35G6	0.000990015	0.390339512	0	0	0	NA	NA	NA	NA	Yes	Mesenchymal_Stem_Cell:Mesendoderm	rs78378222;rs35850753
ENSG00000181222	POLR2A	17	7387685	7417933	1	protein_coding	5430	POLR2A	0.999999942	0.931618008	0	0	0	NA	NA	NA	NA	Yes	Mesenchymal_Stem_Cell:Mesendoderm	rs78378222;rs35850753
ENSG00000129226	CD68	17	7482785	7485429	1	protein_coding	968	CD68	0.000599774	0.428807086	0	0	0	NA	NA	NA	NA	Yes	Hippocampus:Mesenchymal_Stem_Cell:Mesendoderm:hESC	rs78378222;rs35850753
ENSG00000129255	MPDU1	17	7486847	7496107	1	protein_coding	9526	MPDU1	0.144211428	-0.627830289	0	0	0	NA	NA	NA	NA	Yes	Hippocampus:Mesenchymal_Stem_Cell:Mesendoderm:hESC	rs78378222;rs35850753
ENSG00000129194	SOX15	17	7491496	7493488	-1	protein_coding	6665	SOX15	0.361605911	-0.211833302	0	0	0	NA	NA	NA	NA	Yes	Hippocampus:Mesenchymal_Stem_Cell:Mesendoderm:hESC	rs78378222;rs35850753
ENSG00000129245	FXR2	17	7494548	7518189	-1	protein_coding	9513	FXR2	0.999770109	NA	0	0	0	NA	NA	NA	NA	Yes	Hippocampus:Mesenchymal_Stem_Cell:Mesendoderm:hESC	rs78378222;rs35850753
ENSG00000268503	AC007421.1	17	7517264	7517427	1	protein_coding	NA	NA	NA	NA	0	0	0	NA	NA	NA	NA	Yes	Hippocampus:Mesenchymal_Stem_Cell:Mesendoderm:hESC	rs78378222;rs35850753
ENSG00000129214	SHBG	17	7517382	7536700	1	protein_coding	6462	SHBG	0.000188842	0.239750308	0	0	0	NA	NA	NA	NA	Yes	Hippocampus:Mesenchymal_Stem_Cell:Mesendoderm:hESC	rs78378222;rs35850753
ENSG00000141510	TP53	17	7565097	7590856	-1	protein_coding	7157	TP53	0.912222953	-0.1200951	1	17.97	0	NA	NA	NA	NA	No	NA	rs78378222
ENSG00000141510	TP53	17	7565097	7590856	-1	protein_coding	7157	TP53	0.912	-0.120	1	17.97	11	5.70E-10	6.16E-06	BIOS_eQTL_geneLevel	-	No	NA	rs35850753
ENSG00000170049	KCNAB3	17	7825177	7833121	-1	protein_coding	9196	KCNAB3	6.03306E-12	-0.030608876	0	0	0	NA	NA	NA	NA	Yes	Mesenchymal_Stem_Cell	rs78378222;rs35850753
ENSG00000262730	RP11-1099M24.7	17	7829249	7833940	-1	protein_coding	NA	NA	NA	NA	0	0	0	NA	NA	NA	NA	Yes	Mesenchymal_Stem_Cell	rs78378222;rs35850753
ENSG00000170043	TRAPPC1	17	7833663	7835441	-1	protein_coding	58485	TRAPPC1	0.227722385	-0.015849429	0	0	0	NA	NA	NA	NA	Yes	Mesenchymal_Stem_Cell	rs78378222;rs35850753
ENSG00000170037	CNTROB	17	7835419	7853236	1	protein_coding	116840	CNTROB	1.23733E-11	0.194205856	0	0	0	NA	NA	NA	NA	Yes	Mesenchymal_Stem_Cell	rs78378222;rs35850753
ENSG00000179148	ALOXE3	17	7999218	8022365	-1	protein_coding	59344	ALOXE3	2.16325E-13	0.822045161	0	0	0	NA	NA	NA	NA	Yes	Mesenchymal_Stem_Cell:Mesendoderm	rs78378222;rs35850753
ENSG00000179111	HES7	17	8023908	8027410	-1	protein_coding	84667	HES7	0.78288357	0.446451979	0	0	0	NA	NA	NA	NA	Yes	Mesenchymal_Stem_Cell:Mesendoderm	rs78378222;rs35850753
eQTL were identified based on LD r2=0.6
The column minGwasP was removed as FUMA was conducted using derived standardized effect estimates only.
Greyed cell indicate a sensitivity analysis for eQTL at TP53 based on LD r2=0.2
