# Supplementary material for: Low-frequency variation in TP53 has large effects on head circumference and intracranial volume
Source: Nat Commun. 2019 Jan 21;10:357. doi: 10.1038/s41467-018-07863-x (PMC6341110; doi:10.1038/s41467-018-07863-x)
Supplement: Supplementary file 21 — Supplementary Data 18 [file 41467_2018_7863_MOESM21_ESM.xlsx]

## Sheet: Sheet1
FUMA GWAS catalogue: ICV+HC (Pediatric+adult): Novel independent single variants (p < 5E-08)
IndSigSNP	chr	bp	snp	DateAddedToCatalog	PMID	FirstAuth	Date	Journal	Link	Study	Trait	InitialN	ReplicationN	Region	ReportedGene	MappedGene	UpGene	DownGene	SNP_Gene_ID	UpGeneDist	DownGeneDist	Strongest	SNPs	marged	SNP_ID_cur	Context	intergenic	RiskAF	P	Pmlog	Ptext	OrBeta	95CI	Platform	CNV
rs2168812	1	243835186	rs320320	41514	23599027	Demerath EW	41381	Hum Mol Genet	www.ncbi.nlm.nih.gov/pubmed/23599027	Genome-wide association study of age at menarche in African-American women.	Menarche (age at onset)	18,089 African American individuals	2,850 African American individuals, 87,802 European ancestry inidividuals	1q44	AKT3	AKT3			10000			rs320320-A	rs320320	0	320320	intron_variant	0	0.48	0.000005	5.301029996	(AA)	4.03	[2.31-5.75] unit increase	Affymetrix, Illumina [NR] (imputed)	N
rs2168812	1	243835186	rs320320	41514	23599027	Demerath EW	41381	Hum Mol Genet	www.ncbi.nlm.nih.gov/pubmed/23599027	Genome-wide association study of age at menarche in African-American women.	Menarche (age at onset)	18,089 African American individuals	2,850 African American individuals, 87,802 European ancestry inidividuals	1q44	AKT3	AKT3			10000			rs320320-A	rs320320	0	320320	intron_variant	0	0.8	0.0000001	7	(EA)	1.659	[0.74-2.58] unit increase	Affymetrix, Illumina [NR] (imputed)	N
rs2168812	1	243851947	rs12076373	42929	28346443	Melin BS	42821	Nat Genet	www.ncbi.nlm.nih.gov/pubmed/28346443	Genome-wide association study of glioma subtypes identifies specific differences in genetic susceptibility to glioblastoma and non-glioblastoma tumors.	Non-glioblastoma glioma	5,819 European ancestry cases, 18,190 European ancestry controls.	NA	1q44	AKT3	AKT3			10000			rs12076373-G	rs12076373	0	12076373	intron_variant	0	0.837	3E-10	9.522878745		1.23	1.16-1.32	Illumina [at least 6769856] (imputed)	N
rs2168812	1	243943084	rs4132509	40176	20031603	Marroni F	40026	Circ Cardiovasc Genet	www.ncbi.nlm.nih.gov/pubmed/20031603	A genome-wide association scan of RR and QT interval duration in 3 European genetically isolated populations: the EUROSPAN project.	RR interval (heart rate)	2,325 European ancestry individuals	NA	1q44	AKT3	AKT3			10000			rs4132509-A	rs4132509	0	4132509	intron_variant	0	0.21	0.000002	5.698970004		0.18	[0.10-0.26] unit decrease	Illumina [~ 318327]	N
rs429150a	6	32050067	rs185819	39630	18391951	Gudbjartsson DF	39544	Nat Genet	www.ncbi.nlm.nih.gov/pubmed/18391951	Many sequence variants affecting diversity of adult human height.	Height	30,968 European ancestry individuals	8,541 European ancestry individuals	6p21.33	HLA class III	TNXB			7148			rs185819-T	rs185819	0	185819	missense_variant	0	0.52	0.00000003	7.522878745		5.2	[3.44-6.96] % s.d. increase	Affymetrix, Illumina [up to 304226]	N
rs429150a	6	32050067	rs185819	43000	28739976	Wain LV	42940	Hypertension	www.ncbi.nlm.nih.gov/pubmed/28739976	Novel Blood Pressure Locus and Gene Discovery Using Genome-Wide Association Study and Expression Data Sets From Blood and the Kidney.	Systolic blood pressure	150,134 European ancestry individuals	87,359 European ancestry individuals, 140,886 European and unknown ancestry individuals	6p21.33	TNXB	TNXB			7148			rs185819-C	rs185819	0	185819	missense_variant	0	0.513	1E-17	17		0.365	[0.28-0.45] unit increase	Affymetrix, Illumina, Perlegen [7994604] (imputed)	N
rs429150a	6	32050067	rs185819	43000	28739976	Wain LV	42940	Hypertension	www.ncbi.nlm.nih.gov/pubmed/28739976	Novel Blood Pressure Locus and Gene Discovery Using Genome-Wide Association Study and Expression Data Sets From Blood and the Kidney.	Systolic blood pressure	150,134 European ancestry individuals	87,359 European ancestry individuals, 140,886 European and unknown ancestry individuals	6p21.33	TNXB	TNXB			7148			rs185819-C	rs185819	0	185819	missense_variant	0	0.513	2E-13	12.69897	(EA, initial)	0.534	[0.39-0.68] unit increase	Affymetrix, Illumina, Perlegen [7994604] (imputed)	N
rs429150a	6	32075563	rs429150	42977	27863252	Astle WJ	42691	Cell	www.ncbi.nlm.nih.gov/pubmed/27863252	The Allelic Landscape of Human Blood Cell Trait Variation and Links to Common Complex Disease.	Mean corpuscular volume	172,433 European ancestry individuals	NA	6p21.32	TNXB, ATF6B	TNXB			7148			rs429150-C	rs429150	0	429150	intron_variant	0	0.4446	3E-13	12.52287875		0.02583585	[0.019-0.033] unit decrease	Affymetrix [~ 2500000] (imputed)	N
rs429150a	6	32076499	rs2269426	39873	19198610	Gudbjartsson DF	39852	Nat Genet	www.ncbi.nlm.nih.gov/pubmed/19198610	Sequence variants affecting eosinophil numbers associate with asthma and myocardial infarction.	Eosinophil counts	9,392 European ancestry individuals	12,118 European ancestry individuals, 5,212 East Asian ancestry individuals	6p21.32	MHC	TNXB			7148			rs2269426-T	rs2269426	0	2269426	intron_variant	0	0.76	0.000003	5.522878745	(EA)	4.6	[2.7-6.6] % standard unit increase	Illumina [312179]	N
rs429150a	6	32094593	rs204893	43132	29255261	Luciano M	43087	Nat Genet	www.ncbi.nlm.nih.gov/pubmed/29255261	Association analysis in over 329,000 individuals identifies 116 independent variants influencing neuroticism.	Neuroticism	329,821 European ancestry individuals	122,867 European ancestry individuals	6p21.32	intergenic	ATF6B			1388			rs204893-T	rs204893	0	204893	intron_variant	0	0.55833	1E-12	12		7.076	z score decrease	Illumina [18485882] (imputed)	N
rs9271147	6	32232652	rs9268072	43070	28928442	Tian C	42997	Nat Commun	www.ncbi.nlm.nih.gov/pubmed/28928442	Genome-wide association and HLA region fine-mapping studies identify susceptibility loci for multiple common infections.	Hepatitis B	1,425 European ancestry cases, 218,180 European ancestry controls	NA	6p21.32	NR	LOC101929163			101929163			rs9268072-?	rs9268072	0	9268072	non_coding_transcript_exon_variant	0	NR	0.000001	6		0.2518	[0.15-0.36] unit increase	Illumina [at least 560000] (imputed)	N
rs9271147	6	32266310	rs9268155	43070	28928442	Tian C	42997	Nat Commun	www.ncbi.nlm.nih.gov/pubmed/28928442	Genome-wide association and HLA region fine-mapping studies identify susceptibility loci for multiple common infections.	Childhood ear infection	46,936 European ancestry cases, 74,874 European ancestry controls	NA	6p21.32	NR	C6orf10, LOC101929163			10665, 101929163			rs9268155-?	rs9268155	0	9268155	intron_variant	0	NR	1E-10	10		0.073	[0.051-0.095] unit decrease	Illumina [at least 560000] (imputed)	N
rs9271147	6	32305979	rs3129900	40423	20639878	Singer JB	40377	Nat Genet	www.ncbi.nlm.nih.gov/pubmed/20639878	A genome-wide study identifies HLA alleles associated with lumiracoxib-related liver injury.	Lumiracoxib-related liver injury	31 European ancestry cases, 3 Hispanic cases, 1 case, 176 European, Hispanic and other ancestry controls	79 European ancestry cases, 16 Hispanic ancestry cases, 1 case, 405 European, Hispanic and other ancestry controls	6p21.32	HLA-DRB1	C6orf10, LOC101929163			10665, 101929163			rs3129900-?	rs3129900	0	3129900	intron_variant	0	0.105	7E-25	24.15490196		7.5	[5.0-11.3]	Affymetrix [682386]	N
rs9271147	6	32336187	rs3129934	39791	18941528	Comabella M	39743	PLoS One	www.ncbi.nlm.nih.gov/pubmed/18941528	Identification of a novel risk locus for multiple sclerosis at 13q31.3 by a pooled genome-wide scan of 500,000 single nucleotide polymorphisms.	Multiple sclerosis	242 European ancestry cases, 242 European ancestry controls	553 European ancestry cases, 1,033 European ancestry controls	6p21.32	HLA-DRB1	C6orf10, LOC101929163			10665, 101929163			rs3129934-T	rs3129934	0	3129934	intron_variant	0	NR	9E-11	10.04575749		3.3	[2.3-4.9]	Affymetrix [428867]	N
rs9271147	6	32336187	rs3129934	41040	22457343	Martinelli-Boneschi F	40996	Mult Scler	www.ncbi.nlm.nih.gov/pubmed/22457343	A genome-wide association study in progressive multiple sclerosis.	Multiple sclerosis	197 European ancestry cases, 234 European ancestry controls	379 European ancestry cases, 398 European ancestry controls	6p21.32	C6orf10	C6orf10, LOC101929163			10665, 101929163			rs3129934-T	rs3129934	0	3129934	intron_variant	0	0.1	7E-16	15.15490196		2.34	[1.90-2.87]	Affymetrix [277866]	N
rs9271147	6	32392981	rs3135350	42095	24962563	Rubicz R	41821	Genet Epidemiol	www.ncbi.nlm.nih.gov/pubmed/24962563	Genome-wide genetic and transcriptomic investigation of variation in antibody response to dietary antigens.	Food antigen IgG levels	1,367 Mexican Americans from 63 families	NA	6p21.32	NOTCH4, HLA-DRA, BTNL2	BTNL2 - HLA-DRA	56244	3122		16325	14638	rs3135350-G	rs3135350	0	3135350	intron_variant	1	0.046	0.00000009	7.045757491	(Gliadin)	0.51	[NR] unit increase	Illumina [944565] (imputed)	N
rs9271147	6	32401079	rs3129860	41359	23321320	Urabe Y	41286	J Hepatol	www.ncbi.nlm.nih.gov/pubmed/23321320	A genome-wide association study of HCV-induced liver cirrhosis in the Japanese population identifies novel susceptibility loci at the MHC region.	Hepatitis C induced liver cirrhosis	682 Japanese ancestry cases, 1,045 Japanese ancestry controls	936 Japanese ancestry cases, 3,809 Japanese ancestry controls	6p21.32	intergenic	BTNL2 - HLA-DRA	56244	3122		24423	6540	rs3129860-A	rs3129860	0	3129860	intron_variant	1	0.231	0.000000001	9		1.36	[1.22-1.49]	Illumina [431618]	N
rs9271147	6	32404377	rs3129868	43070	28928442	Tian C	42997	Nat Commun	www.ncbi.nlm.nih.gov/pubmed/28928442	Genome-wide association and HLA region fine-mapping studies identify susceptibility loci for multiple common infections.	Childhood ear infection	46,936 European ancestry cases, 74,874 European ancestry controls	NA	6p21.32	NR	BTNL2 - HLA-DRA	56244	3122		27721	3242	rs3129868-?	rs3129868	0	3129868	intron_variant	1	NR	6E-10	9.22184875		0.077	[0.052-0.101] unit increase	Illumina [at least 560000] (imputed)	N
rs9271147	6	32413051	rs3135388	39615	17660530	Hafler DA	39292	N Engl J Med	www.ncbi.nlm.nih.gov/pubmed/17660530	Risk alleles for multiple sclerosis identified by a genomewide study.	Multiple sclerosis	931 European ancestry trios, 2,431 European ancestry controls	609 European ancestry trios, 2,322 European ancestry cases, 2,987 European ancestry controls	6p21.32	HLA-DRA	HLA-DRA - HLA-DRB9	3122	3132		228	14546	rs3135388-A	rs3135388	0	3135388	downstream_gene_variant	1	0.23	9E-81	80.04575749		1.99	[1.84-2.15]	Affymetrix [334923]	N
rs9271147	6	32413051	rs3135388	39993	19525953	De Jager PL	39978	Nat Genet	www.ncbi.nlm.nih.gov/pubmed/19525953	Meta-analysis of genome scans and replication identify CD6, IRF8 and TNFRSF1A as new multiple sclerosis susceptibility loci.	Multiple sclerosis	2,624 European ancestry cases, 7,220 European ancestry controls	2,215 European ancestry cases, 2,116 European ancestry controls	6p21.32	HLA-DRB1	HLA-DRA - HLA-DRB9	3122	3132		228	14546	rs3135388-A	rs3135388	0	3135388	downstream_gene_variant	1	0.22	4E-225	224.39794		2.75	[2.46-3.07]	Affymetrix, Illumina [~ 2560000] (imputed)	N
rs9271147	6	32413545	rs3129889	40925	22190364	Patsopoulos NA	40878	Ann Neurol	www.ncbi.nlm.nih.gov/pubmed/22190364	Genome-wide meta-analysis identifies novel multiple sclerosis susceptibility loci.	Multiple sclerosis	5,545 European ancestry cases, 12,153 European ancestry controls	NA	6p21.32	HLA-DRB1	HLA-DRA - HLA-DRB9	3122	3132		722	14052	rs3129889-G	rs3129889	0	3129889	downstream_gene_variant	1	0.2	1E-206	206		2.97	[NR]	Affymetrix, Illumina [2529394]	N
rs9271147	6	32432969	rs9268925	43017	28199695	Jones AV	42826	Hum Mol Genet	www.ncbi.nlm.nih.gov/pubmed/28199695	GWAS of self-reported mosquito bite size, itch intensity and attractiveness to mosquitoes implicates immune-related predisposition loci.	Mosquito bite size	84,724 European ancestry individuals	NA	6p21.32	Intergenic	HLA-DRB9 - HLA-DRB5	3132	3127		5103	52151	rs9268925-C	rs9268925	0	9268925	intron_variant	1	NR	1E-23	23		0.0788801	[0.063-0.094] unit increase	Illumina [13520550] (imputed)	N
rs9271147	6	32487987	rs140973961	42916	28289848	Haralambieva IH	42826	Hum Genet	www.ncbi.nlm.nih.gov/pubmed/28289848	Genome-wide associations of CD46 and IFI44L genetic variants with neutralizing antibody response to measles vaccine.	Immune response to measles vaccine (measles-induced IFN gamma)	up to 2,555 European ancestry individuals, up to 317 African American individuals	NA	6p21.32	HLA-DRB5	HLA-DRB5			3127			rs140973961-C	rs140973961	0	140973961	intron_variant	0	0.34	0.000001	6				Illumina [at least 508199]	N
rs9271147	6	32566577	rs4329147	42866	27182965	Pickrell JK	42506	Nat Genet	www.ncbi.nlm.nih.gov/pubmed/27182965	Detection and interpretation of shared genetic influences on 42 human traits.	Childhood ear infection	46,936 European ancestry cases, 74,874 European ancestry controls	NA	6p21.32	HLA-DRB5, HLA-DQA1	HLA-DRB1 - LOC107986589	3123	107986589		8964	38388	rs4329147-?	rs4329147	0	4329147	intron_variant	1	NR	1E-11	11		1.111	[1.078-1.146]	Illumina [13754664] (imputed)	N
rs9271147	6	32566577	rs4329147	43070	28928442	Tian C	42997	Nat Commun	www.ncbi.nlm.nih.gov/pubmed/28928442	Genome-wide association and HLA region fine-mapping studies identify susceptibility loci for multiple common infections.	Childhood ear infection	46,936 European ancestry cases, 74,874 European ancestry controls	NA	6p21.32	HLA-DRB1	HLA-DRB1 - LOC107986589	3123	107986589		8964	38388	rs4329147-T	rs4329147	0	4329147	intron_variant	1	0.83	1E-11	11		1.11	[1.09-1.13]	Illumina [at least 560000] (imputed)	N
rs9271147	6	32573991	rs9270984	41326	23273568	Yang W	41270	Am J Hum Genet	www.ncbi.nlm.nih.gov/pubmed/23273568	Meta-analysis followed by replication identifies loci in or near CDKN1B, TET3, CD80, DRAM1, and ARID5B as associated with systemic lupus erythematosus in Asians.	Systemic lupus erythematosus	1,656 Han Chinese ancestry cases, 3,394 Han Chinese ancestry controls	3,256 Han Chinese ancestry cases, 5,667 Han Chinese ancestry controls, 453 Thai ancestry cases, 963 Thai ancestry controls	6p21.32	HLA-DRB1	HLA-DRB1 - LOC107986589	3123	107986589		16378	30974	rs9270984-T	rs9270984	0	9270984	intron_variant	1	0.18	5E-24	23.30103		1.73		Illumina [2100739] (imputed)	N
rs9271147	6	32574060	rs9270986	42383	25643325	Renton AE	42095	JAMA Neurol	www.ncbi.nlm.nih.gov/pubmed/25643325	A Genome-wide Association Study of Myasthenia Gravis.	Myasthenia gravis	972 European ancestry cases, 1,977 European ancestry controls	423 European ancestry cases, 467 European ancestry controls	6p21.32	HLA-DRB1, HLA-DQA1	HLA-DRB1 - LOC107986589	3123	107986589		16447	30905	rs9270986-A	rs9270986	0	9270986	intron_variant	1	0.15	0.00000006	7.22184875		1.43	[NR]	Illumina [8114394] (imputed)	N
rs9271147	6	32586854	rs9271366	39994	19525955	Bahlo	39978	Nat Genet	www.ncbi.nlm.nih.gov/pubmed/19525955	Genome-wide association study identifies new multiple sclerosis susceptibility loci on chromosomes 12 and 20.	Multiple sclerosis	1,618 European ancestry cases, 3,413 European ancestry controls	2,256 European ancestry cases, 2,310 European ancestry controls	6p21.32	HLA-DRB1	HLA-DRB1 - LOC107986589	3123	107986589		29241	18111	rs9271366-G	rs9271366	0	9271366	intergenic_variant	1	0.15	7E-184	183.154902		2.78	[NR]	Illumina [302098]	N
rs9271147	6	32586854	rs9271366	40373	20598377	Nischwitz S	40359	J Neuroimmunol	www.ncbi.nlm.nih.gov/pubmed/20598377	Evidence for VAV2 and ZNF433 as susceptibility genes for multiple sclerosis.	Multiple sclerosis	590 European ancestry cases, 825 European ancestry controls	NA	6p21.32	DQA1	HLA-DRB1 - LOC107986589	3123	107986589		29241	18111	rs9271366-G	rs9271366	0	9271366	intergenic_variant	1	NR	4E-17	16.39794001		2.62	[2.09-3.28]	Illumina [~ 300000]	N
rs9271147	6	32586854	rs9271366	40442	20694011	Ferreira RC	40398	Nat Genet	www.ncbi.nlm.nih.gov/pubmed/20694011	Association of IFIH1 and other autoimmunity risk alleles with selective IgA deficiency.	Immunoglobulin A	430 European ancestry cases, 1,090 European ancestry controls	342 European ancestry cases, 886 European ancestry controls	6p21.32	HLA-DRB1	HLA-DRB1 - LOC107986589	3123	107986589		29241	18111	rs9271366-?	rs9271366	0	9271366	intergenic_variant	1	0.85	3E-33	32.52287875		7.69	[5.26-11.11]	Illumina [2057134] (imputed)	N
rs9271147	6	32586854	rs9271366	41482	23511034	Yang SK	41365	Inflamm Bowel Dis	www.ncbi.nlm.nih.gov/pubmed/23511034	Genome-wide association study of ulcerative colitis in Koreans suggests extensive overlapping of genetic susceptibility with Caucasians.	Ulcerative colitis	388 Korean ancestry cases, 739 Korean ancestry controls	417 Korean ancestry cases, 732 Korean ancestry controls	6p21.32	HLA-DRB1, HLA-DQA1	HLA-DRB1 - LOC107986589	3123	107986589		29241	18111	rs9271366-G	rs9271366	0	9271366	intergenic_variant	1	0.11	1E-18	18		2.1	[1.78-2.48]	Illumina [581060]	N
rs9271147	6	32586854	rs9271366	41674	23850713	Yang SK	41469	Gut	www.ncbi.nlm.nih.gov/pubmed/23850713	Genome-wide association study of Crohn's disease in Koreans revealed three new susceptibility loci and common attributes of genetic susceptibility across ethnic populations.	Crohn's disease	532 Korean ancestry cases, 733 Korean ancestry controls	1,779 Korean ancestry cases, 1,709 Korean ancestry controls	6p21.32	HLA-DRA, HLA-DRB5, BTNL2, HLA-DRB1, HLA-DQA1	HLA-DRB1 - LOC107986589	3123	107986589		29241	18111	rs9271366-A	rs9271366	0	9271366	intergenic_variant	1	0.888	5E-12	11.30103		1.66	[1.44-1.92]	Illumina [5664371] (imputed)	N
rs9271147	6	32586854	rs9271366	42108	21699788	Okada Y	40714	Gastroenterology	www.ncbi.nlm.nih.gov/pubmed/21699788	HLA-Cw*1202-B*5201-DRB1*1502 haplotype increases risk for ulcerative colitis but reduces risk for Crohn's disease.	Ulcerative colitis or Crohn's disease	372 Japanese ancestry Crohn's disease cases, 372 Japanese ancestry ulcerative colitis cases	607 Japanese ancestry Crohn's disease cases, 376 Japanese ancestry ulcerative colitis cases	6p21.32	MHC, HLA-DRB1	HLA-DRB1 - LOC107986589	3123	107986589		29241	18111	rs9271366-C	rs9271366	0	9271366	intergenic_variant	1	0.21	2E-70	69.69897	(UC vs. CD)	4.44	[3.74-5.27]	Illumina [461368]	N
rs9271147	6	32586854	rs9271366	43017	19838195	Gateva V	40118	Nat Genet	www.ncbi.nlm.nih.gov/pubmed/19838195	A large-scale replication study identifies TNIP1, PRDM1, JAZF1, UHRF1BP1 and IL10 as risk loci for systemic lupus erythematosus.	Systemic lupus erythematosus	1,310 European ancestry cases, 7,859 European ancestry controls	1,963 European ancestry cases, 4,329 European ancestry controls	6p21.32	HLA-DRB1	HLA-DRB1 - LOC107986589	3123	107986589		29241	18111	rs9271366-G	rs9271366	0	9271366	intergenic_variant	1	0.16	0.0000001	7		1.26	[1.18-1.36]	Illumina [~ 2100000] (imputed)	N
rs9271147	6	32592200	rs9271640	41438	23472185	Mero IL	41338	PLoS One	www.ncbi.nlm.nih.gov/pubmed/23472185	Oligoclonal band status in Scandinavian multiple sclerosis patients is associated with specific genetic risk alleles.	Multiple sclerosis (OCB status)	1,367 European ancestry OCB positive cases, 161 European ancestry OCB negative cases, 428 European ancestry controls	NA	6p21.32	HLA-DQA1	HLA-DRB1 - LOC107986589	3123	107986589		34587	12765	rs9271640-?	rs9271640	0	9271640	upstream_gene_variant	1	NR	2E-20	19.69897	(OCB positive vs. controls)	2.37	[1.97-2.84]	Illumina [495970]	N
rs9271147	6	32592200	rs9271640	42311	25616667	Goris A	42026	Brain	www.ncbi.nlm.nih.gov/pubmed/25616667	Genetic variants are major determinants of CSF antibody levels in multiple sclerosis.	Oligoclonal band status in multiple sclerosis	2,232 European ancestry OCB positive individuals, 275 European ancestry OCB negative individuals, 439 OCB positive individuals, 80 OCB negative individuals	3,026 OCB positive individuals, 452 OCB negative individuals	6p21.32	HLA-DRB1	HLA-DRB1 - LOC107986589	3123	107986589		34587	12765	rs9271640-A	rs9271640	0	9271640	upstream_gene_variant	1	NR	5E-12	11.30103		1.56	[1.38-1.77]	NR [485522]	N
rs9271147	6	32612301	rs9273076	42636	26502338	Bentham J	42303	Nat Genet	www.ncbi.nlm.nih.gov/pubmed/26502338	Genetic association analyses implicate aberrant regulation of innate and adaptive immunity genes in the pathogenesis of systemic lupus erythematosus.	Systemic lupus erythematosus	5,201 European ancestry cases, 9,066 European ancestry controls	NA	6p21.32	HLA-DQ1	HLA-DQA1			3117			rs9273076-T	rs9273076	0	9273076	non_coding_transcript_exon_variant	0		8E-13	12.09691001	(conditional)	1.3	[NR]	Illumina [> 644674] (imputed)	N
rs9271147	6	32659838	rs3129718	43070	28928442	Tian C	42997	Nat Commun	www.ncbi.nlm.nih.gov/pubmed/28928442	Genome-wide association and HLA region fine-mapping studies identify susceptibility loci for multiple common infections.	Hepatitis B	1,425 European ancestry cases, 218,180 European ancestry controls	NA	6p21.32	NR	HLA-DQB1 - MTCO3P1	3119	404026		25372	14083	rs3129718-?	rs3129718	0	3129718	regulatory_region_variant	1	NR	0.000006	5.22184875		0.3099	[0.17-0.45] unit decrease	Illumina [at least 560000] (imputed)	N
rs7808664	7	32953295	rs3956705	42977	27863252	Astle WJ	42691	Cell	www.ncbi.nlm.nih.gov/pubmed/27863252	The Allelic Landscape of Human Blood Cell Trait Variation and Links to Common Complex Disease.	Red cell distribution width	171,529 European ancestry individuals	NA	7p14.3	AVL9	KBTBD2 - RP9P	25948	441212		21539	3132	rs3956705-T	rs3956705	0	3956705	downstream_gene_variant	1	0.3756	7E-33	32.15490196		0.04369549	[0.037-0.051] unit decrease	Affymetrix [~ 2500000] (imputed)	N
rs3217870	12	4405389	rs3217901	41324	23266556	Peters U	41264	Gastroenterology	www.ncbi.nlm.nih.gov/pubmed/23266556	Identification of Genetic Susceptibility Loci for Colorectal Tumors in a Genome-Wide Meta-analysis.	Colorectal cancer	12,696 European ancestry colorectal tumor cases, 15,113 European ancestry controls	958 European ancestry colorectal tumor cases, 909 European ancestry controls, up to 2,098 East Asian ancestry colorectal tumor cases, up to 5,749 East Asian ancestry controls	12p13.32	CCND2	CCND2			894			rs3217901-G	rs3217901	0	3217901	intron_variant	0	0.41	0.0000003	6.522878745		1.1	[1.06-1.14]	Affymetrix, Illumina [2708280] (imputed)	N
rs3217870	12	4405389	rs3217901	42531	26151821	Schumacher FR	42192	Nat Commun	www.ncbi.nlm.nih.gov/pubmed/26151821	Genome-wide association study of colorectal cancer identifies six new susceptibility loci.	Colorectal cancer	18,299 European ancestry cases, 19,656 European ancestry controls	4,725 East Asian ancestry cases, 9,969 East Asian ancestry controls	12p13.32	CCND2	CCND2			894			rs3217901-G	rs3217901	0	3217901	intron_variant	0	0.41	0.000002	5.698970004		1.0869565	[1.05-1.12]	Affymetrix, Illumina [~ 2500000] (imputed)	N
rs78378222	17	7417640	rs8753	42655	26424050	Kinnersley B	42278	Nat Commun	www.ncbi.nlm.nih.gov/pubmed/26424050	Genome-wide association study identifies multiple susceptibility loci for glioma.	Non-glioblastoma glioma	2,364 Northern European ancestry cases, 7,435 Northern European ancestry controls	up to 1,490 European ancestry cases, up to 1,723 European ancestry controls	17p13.1	NR	POLR2A			5430			rs8753-T	rs8753	0	8753	non_coding_transcript_exon_variant	0	NR	8E-18	17.09691001		3.09	[2.39-4.00]	Illumina [at least 8427548] (imputed)	N
rs78378222	17	7571752	rs78378222	41674	21946351	Stacey SN	40811	Nat Genet	www.ncbi.nlm.nih.gov/pubmed/21946351	A germline variant in the TP53 polyadenylation signal confers cancer susceptibility.	Basal cell carcinoma	2,121 European ancestry cases, 39,614 European ancestry controls	2,506 European and other ancestry cases, 15,101 European and other ancestry controls	17p13.1	TP53	TP53			7157			rs78378222-C	rs78378222	0	78378222	3_prime_UTR_variant	0	NR	2E-20	19.69897		2.16	[1.83-2.54]	Illumina [~ 16000000] (imputed)	N
rs78378222	17	7571752	rs78378222	41914	24403052	Stacey SN	41647	Hum Mol Genet	www.ncbi.nlm.nih.gov/pubmed/24403052	Germline sequence variants in TGM3 and RGS22 confer risk of basal cell carcinoma.	Basal cell carcinoma	4,208 European ancestry cases, 109,408 European ancestry controls	up to 1,480 European ancestry cases, up to 4,610 European ancestry controls	17p13.1	TP53	TP53			7157			rs78378222-G	rs78378222	0	78378222	3_prime_UTR_variant	0		4E-22	21.39794001		2.24	[1.90-2.64]	Illumina [38500000] (imputed)	N
rs78378222	17	7571752	rs78378222	42329	25855136	Stacey SN	42103	Nat Commun	www.ncbi.nlm.nih.gov/pubmed/25855136	New basal cell carcinoma susceptibility loci.	Basal cell carcinoma	4,572 European ancestry cases, 266,358 European ancestry controls	up to 956 European ancestry cases, up to 4,214 European ancestry controls, 526 cases, 528 controls	17p13.1	TP53	TP53			7157			rs78378222-G	rs78378222	0	78378222	3_prime_UTR_variant	0	0.018	1E-20	20		2.07	[NR]	Illumina [24988228] (imputed)	N
rs78378222	17	7571752	rs78378222	42805	27539887	Chahal HS	42601	Nat Commun	www.ncbi.nlm.nih.gov/pubmed/27539887	Genome-wide association study identifies 14 novel risk alleles associated with basal cell carcinoma.	Basal cell carcinoma	12.945 European ancestry cases, 274,252 European ancestry controls	4,242 European ancestry cases, 12,802 European ancestry controls	17p13.1	TP53	TP53			7157			rs78378222-G	rs78378222	0	78378222	3_prime_UTR_variant	0	0.01	2E-10	9.698970004		1.41	[NR]	Illumina [at least 560000] (imputed)	N
rs78378222	17	7571752	rs78378222	42917	28135244	Warren HR	42765	Nat Genet	www.ncbi.nlm.nih.gov/pubmed/28135244	Genome-wide association analysis identifies novel blood pressure loci and offers biological insights into cardiovascular risk.	Pulse pressure	140,886 European ancestry individuals	190,318 European ancestry individuals	17p13.1	TP53, SLC2A4	TP53			7157			rs78378222-T	rs78378222	0	78378222	3_prime_UTR_variant	0	0.99	2E-10	9.698970004		0.904	[0.63-1.18] unit increase	Affymetrix [~ 9800000] (imputed)	N
rs78378222	17	7571752	rs78378222	42929	28346443	Melin BS	42821	Nat Genet	www.ncbi.nlm.nih.gov/pubmed/28346443	Genome-wide association study of glioma subtypes identifies specific differences in genetic susceptibility to glioblastoma and non-glioblastoma tumors.	Glioblastoma	6,191 European ancestry cases, 18,190 European ancestry controls.	NA	17p13.1	TP53	TP53			7157			rs78378222-G	rs78378222	0	78378222	3_prime_UTR_variant	0	0.013	5E-29	28.30103		2.63	2.22-3.11	Illumina [at least 6790270] (imputed)	N
rs78378222	17	7571752	rs78378222	42929	28346443	Melin BS	42821	Nat Genet	www.ncbi.nlm.nih.gov/pubmed/28346443	Genome-wide association study of glioma subtypes identifies specific differences in genetic susceptibility to glioblastoma and non-glioblastoma tumors.	Glioma	12,469 European ancestry cases, 18,190 European ancestry controls.	NA	17p13.1	TP53	TP53			7157			rs78378222-G	rs78378222	0	78378222	3_prime_UTR_variant	0	0.013	9E-38	37.04575749		2.53	2.19-2.91	Illumina [at least 6887412] (imputed)	N
rs78378222	17	7571752	rs78378222	42929	28346443	Melin BS	42821	Nat Genet	www.ncbi.nlm.nih.gov/pubmed/28346443	Genome-wide association study of glioma subtypes identifies specific differences in genetic susceptibility to glioblastoma and non-glioblastoma tumors.	Non-glioblastoma glioma	5,819 European ancestry cases, 18,190 European ancestry controls.	NA	17p13.1	TP53	TP53			7157			rs78378222-G	rs78378222	0	78378222	3_prime_UTR_variant	0	0.013	5E-27	26.30103		2.73	2.27-3.28	Illumina [at least 6769856] (imputed)	N
rs78378222	17	7571752	rs78378222	42977	27863252	Astle WJ	42691	Cell	www.ncbi.nlm.nih.gov/pubmed/27863252	The Allelic Landscape of Human Blood Cell Trait Variation and Links to Common Complex Disease.	Mean corpuscular hemoglobin	172,332 European ancestry individuals	NA	17p13.1	TP53	TP53			7157			rs78378222-G	rs78378222	0	78378222	3_prime_UTR_variant	0	0.0121	0.000000006	8.22184875		0.09653765	[0.064-0.129] unit decrease	Affymetrix [~ 2500000] (imputed)	N
rs35850753	17	7578671	rs35850753	42653	26424050	Kinnersley B	42278	Nat Commun	www.ncbi.nlm.nih.gov/pubmed/26424050	Genome-wide association study identifies multiple susceptibility loci for glioma.	Glioblastoma	1,783 Northern European ancestry cases, 7,435 Northern European ancestry controls	up to 1,490 European ancestry cases, up to 1,723 European ancestry controls	17p13.1	NR	TP53			7157			rs35850753-T	rs35850753	0	35850753	5_prime_UTR_variant	0	NR	4E-12	11.39794001		2.79	[2.09-3.72]	Illumina [at least 8427548] (imputed)	N
rs35850753	17	7578671	rs35850753	42655	26424050	Kinnersley B	42278	Nat Commun	www.ncbi.nlm.nih.gov/pubmed/26424050	Genome-wide association study identifies multiple susceptibility loci for glioma.	Glioma	1,783 Northern European ancestry glioblastoma cases, 2,364 Northern European ancestry non-glioblastoma cases, 7,435 Northern European ancestry controls	1,490 European ancestry cases, 1,723 European ancestry control	17p13.1	NR	TP53			7157			rs35850753-T	rs35850753	0	35850753	5_prime_UTR_variant	0	NR	9E-20	19.04575749		2.53	[2.07-3.08]	Illumina [at least 8427548] (imputed)	N
rs35850753	17	7578671	rs35850753	42958	28545128	McDaniel LD	42873	PLoS Genet	www.ncbi.nlm.nih.gov/pubmed/28545128	Common variants upstream of MLF1 at 3q25 and within CPZ at 4p16 associated with neuroblastoma.	Sporadic neuroblastoma	2,101 European ancestry child cases, 4,202 European ancestry controls	365 African American child cases, 2,491 African American controls, 427 European ancestry cases, 783 European ancestry controls, 371 cases, 1,122 controls	17p13.1	TP53	TP53			7157			rs35850753-T	rs35850753	0	35850753	5_prime_UTR_variant	0	0.020167	0.00000001	8	(European American)	1.9466	[1.57-2.43]	Illumina [7968453] (imputed)	N
a - This variant is in LD with rs9268812 (r2=0.41), a novel signal from HC (pediatric+Adult), but does not pass the adjusted genome-wide threshold of p < 3.3x10-8 in the ICV+HC(Pediatric+adult) meta-analysis
