# Supplementary material for: Low-frequency variation in TP53 has large effects on head circumference and intracranial volume
Source: Nat Commun. 2019 Jan 21;10:357. doi: 10.1038/s41467-018-07863-x (PMC6341110; doi:10.1038/s41467-018-07863-x)
Supplement: Supplementary file 22 — Supplementary Data 19 [file 41467_2018_7863_MOESM22_ESM.xlsx]

## Sheet: rs35850753-eQTLs_query
SNPid	SNPchromosome	SNPpos	featureName	featureChromosome	featurePositionStart	SpearmanRho	pValue
rs35850753	17	7578671	GABARAP	17	7144590	0.118308834	0.008485046
rs35850753	17	7578671	RNASEK	17	6917603	0.11774653	0.008804958
rs35850753	17	7578671	EIF5A	17	7215141	0.106950287	0.017411983
rs35850753	17	7578671	SLC25A35	17	8193377	-0.097616034	0.030059039
rs35850753	17	7578671	C17orf49	17	6920576	0.096154043	0.032624898
rs35850753	17	7578671	MYH10	17	8526565	-0.086482408	0.054744529
rs35850753	17	7578671	KRBA2	17	8271973	-0.08412073	0.06172686
rs35850753	17	7578671	ASGR1	17	7080151	-0.077148156	0.08672851
rs35850753	17	7578671	PLSCR3	17	7297430	0.075798626	0.092401728
rs35850753	17	7578671	CTDNEP1	17	7154616	0.072987104	0.105173981
rs35850753	17	7578671	WRAP53	17	7606561	0.072987104	0.105173981
rs35850753	17	7578671	VAMP2	17	8064637	0.071300191	0.113483884
rs35850753	17	7578671	EIF4A1	17	7481419	-0.067026678	0.136845411
rs35850753	17	7578671	YBX2	17	7196394	0.060953791	0.176186143
rs35850753	17	7578671	TMEM107	17	8077902	0.059154417	0.189320624
rs35850753	17	7578671	MPDU1	17	7490744	-0.057804887	0.199633752
rs35850753	17	7578671	TRAPPC1	17	7834646	0.057355043	0.203160766
rs35850753	17	7578671	CYB5D1	17	7762700	0.0569052	0.206732801
rs35850753	17	7578671	CHRNB1	17	7360040	-0.056792739	0.20763287
rs35850753	17	7578671	ARHGEF15	17	8222374	-0.056455356	0.210350071
rs35850753	17	7578671	CTC1	17	8141607	0.054768443	0.224321138
rs35850753	17	7578671	AC027763.2	17	6905599	0.05308153	0.238941137
rs35850753	17	7578671	AC135178.1	17	8263224	-0.048695556	0.280047827
rs35850753	17	7578671	NEURL4	17	7228750	-0.046333878	0.304060341
rs35850753	17	7578671	SAT2	17	7530277	0.044422043	0.324469619
rs35850753	17	7578671	POLR2A	17	7415477	-0.043634817	0.333126075
rs35850753	17	7578671	TNFSF12	17	7460416	0.041947904	0.352171047
rs35850753	17	7578671	KCTD11	17	7256958	0.040935756	0.363921364
rs35850753	17	7578671	RP11-599B13.6	17	8066198	0.038124235	0.397823774
rs35850753	17	7578671	BCL6B	17	6933135	-0.037899313	0.40061556
rs35850753	17	7578671	EFNB3	17	7612892	0.035762556	0.427718033
rs35850753	17	7578671	TMEM88	17	7759257	0.033738261	0.454349375
rs35850753	17	7578671	TNFSF13	17	7464320	-0.032613652	0.469538151
rs35850753	17	7578671	AC025335.1	17	7816642	-0.031938887	0.47878406
rs35850753	17	7578671	SLC13A5	17	6607355	-0.030814278	0.494411725
rs35850753	17	7578671	KCNAB3	17	7830737	-0.030364435	0.500738092
rs35850753	17	7578671	PHF23	17	7139956	0.028677522	0.524837784
rs35850753	17	7578671	GPS2	17	7217462	-0.0284526	0.528095232
rs35850753	17	7578671	RPL26	17	8285102	-0.0284526	0.528095232
rs35850753	17	7578671	MIR497HG	17	6919141	0.027103069	0.547853191
rs35850753	17	7578671	C17orf61	17	7306302	0.024404009	0.588429901
rs35850753	17	7578671	PFAS	17	8170071	0.024066626	0.593597754
rs35850753	17	7578671	CHD3	17	7814782	0.023054478	0.609224159
rs35850753	17	7578671	ATP1B2	17	7559211	-0.022492174	0.617983556
rs35850753	17	7578671	PER1	17	8054025	-0.022154791	0.62326541
rs35850753	17	7578671	AC113189.5	17	7485790	-0.020580339	0.648166761
rs35850753	17	7578671	NLGN2	17	7318275	-0.019905574	0.658962224
rs35850753	17	7578671	SENP3	17	7474682	0.018668504	0.678937696
rs35850753	17	7578671	LSMD1	17	7760881	0.0181062	0.688093383
rs35850753	17	7578671	ZBTB4	17	7362685	0.0181062	0.688093383
rs35850753	17	7578671	NDEL1	17	8367554	0.0181062	0.688093383
rs35850753	17	7578671	FGF11	17	7345095	0.017993739	0.689930055
rs35850753	17	7578671	DLG4	17	7107357	-0.017993739	0.689930055
rs35850753	17	7578671	C17orf59	17	8093459	-0.013270383	0.76859381
rs35850753	17	7578671	ALOX12P2	17	6856980	0.012483156	0.781964452
rs35850753	17	7578671	ACAP1	17	7254712	-0.012258235	0.785796655
rs35850753	17	7578671	CNTROB	17	7852703	0.010908704	0.808895585
rs35850753	17	7578671	XAF1	17	6673962	0.0103464	0.818570619
rs35850753	17	7578671	CD68	17	7484411	-0.009791616	0.828143336
rs35850753	17	7578671	FXR2	17	7509339	0.00910933	0.839950912
rs35850753	17	7578671	KDM6B	17	7748868	-0.00899687	0.841900677
rs35850753	17	7578671	TP53	17	7579913	-0.008322104	0.853619168
rs35850753	17	7578671	DVL2	17	7133442	0.007984722	0.85949068
rs35850753	17	7578671	ELP5	17	7162008	0.005285661	0.906715126
rs35850753	17	7578671	ACADVL	17	7128276	-0.004610896	0.918579513
rs35850753	17	7578671	SLC16A11	17	6946833	0.002249217	0.960230149
rs35850753	17	7578671	RANGRF	17	8192821	0.000224922	0.996021388
rs35850753	17	7578671	SOX15	17	7492995	-0.000112461	0.998010688

## Sheet: rs35850753-mQTLs_query
SNPid	SNPchromosome	SNPpos	featureName	featureChromosome	featurePositionStart	SpearmanRho	pValue
rs35850753	17	7578671	cg13169780	17	7591570	0.140268552	0.002354749
rs35850753	17	7578671	cg10792831	17	7578689	0.117075052	0.011255346
rs35850753	17	7578671	cg05529097	17	7518511	-0.111341828	0.015963562
rs35850753	17	7578671	cg01807919	17	7518403	-0.097269367	0.035411491
rs35850753	17	7578671	cg13468400	17	7579546	0.095705761	0.0384853
rs35850753	17	7578671	cg05031995	17	7530871	0.094923957	0.040105123
rs35850753	17	7578671	cg12169865	17	7494807	0.091796744	0.047172426
rs35850753	17	7578671	cg05086567	17	7486615	0.089451334	0.053133859
rs35850753	17	7578671	cg14351634	17	7590742	-0.087366525	0.058947446
rs35850753	17	7578671	cg24928161	17	7533115	-0.085412016	0.064866365
rs35850753	17	7578671	cg24837744	17	7620647	0.083587809	0.070823468
rs35850753	17	7578671	cg18105529	17	7643190	-0.081242399	0.079131964
rs35850753	17	7578671	cg05209483	17	7482986	-0.07694248	0.096405682
rs35850753	17	7578671	cg05827058	17	7620372	-0.076551578	0.098114712
rs35850753	17	7578671	cg06812840	17	7492524	0.076160677	0.099847779
rs35850753	17	7578671	cg17379325	17	7555411	0.076160677	0.099847779
rs35850753	17	7578671	cg13546736	17	7486858	0.074466769	0.107640635
rs35850753	17	7578671	cg12731325	17	7671330	0.072772862	0.115905852
rs35850753	17	7578671	cg05270696	17	7483518	0.07238196	0.11788207
rs35850753	17	7578671	cg22259724	17	7479880	-0.071730458	0.121234208
rs35850753	17	7578671	cg16397722	17	7577090	-0.071469857	0.122595693
rs35850753	17	7578671	cg26539663	17	7590939	0.070166851	0.129582471
rs35850753	17	7578671	cg17832704	17	7516888	-0.066909337	0.14839629
rs35850753	17	7578671	cg01013324	17	7608068	0.066388135	0.151590377
rs35850753	17	7578671	cg05432794	17	7608136	-0.065997233	0.154019995
rs35850753	17	7578671	cg22237200	17	7555298	-0.064433626	0.164034094
rs35850753	17	7578671	cg21050342	17	7591644	-0.064173025	0.165749607
rs35850753	17	7578671	cg12041075	17	7579312	0.063912424	0.167478539
rs35850753	17	7578671	cg02690969	17	7590615	-0.063782124	0.168348053
rs35850753	17	7578671	cg26652532	17	7530992	-0.06287002	0.17452944
rs35850753	17	7578671	cg24014629	17	7480077	0.062218517	0.179047054
rs35850753	17	7578671	cg17862722	17	7608411	-0.058961003	0.202940569
rs35850753	17	7578671	cg09141338	17	7517217	0.058439801	0.20696893
rs35850753	17	7578671	cg05070518	17	7555322	-0.057397396	0.215198547
rs35850753	17	7578671	cg13159929	17	7493222	0.055182287	0.233460898
rs35850753	17	7578671	cg27618811	17	7518128	-0.054921686	0.235679342
rs35850753	17	7578671	cg00996262	17	7554930	0.053488379	0.248146536
rs35850753	17	7578671	cg11460029	17	7608747	0.052706576	0.255137409
rs35850753	17	7578671	cg04244857	17	7671200	-0.052185374	0.259873137
rs35850753	17	7578671	cg24877198	17	7656514	-0.051924773	0.262263607
rs35850753	17	7578671	cg22761431	17	7609416	0.051794472	0.263464503
rs35850753	17	7578671	cg25053252	17	7589358	-0.051533871	0.265877626
rs35850753	17	7578671	cg07451297	17	7486874	0.050230865	0.278170437
rs35850753	17	7578671	cg17091998	17	7531155	0.050100565	0.279420591
rs35850753	17	7578671	cg22448889	17	7554681	-0.049970264	0.280674547
rs35850753	17	7578671	cg04501947	17	7653521	0.049709663	0.283193872
rs35850753	17	7578671	cg19178740	17	7518273	-0.049449062	0.285728423
rs35850753	17	7578671	cg12373934	17	7590932	0.048797559	0.292131487
rs35850753	17	7578671	cg22521096	17	7518744	-0.047885455	0.301256044
rs35850753	17	7578671	cg06360527	17	7491548	-0.047103652	0.309226107
rs35850753	17	7578671	cg00966411	17	7622819	-0.04671275	0.313262758
rs35850753	17	7578671	cg10053622	17	7643808	-0.046321849	0.317333831
rs35850753	17	7578671	cg17338258	17	7533521	-0.046061248	0.320067003
rs35850753	17	7578671	cg15095917	17	7482694	0.04423704	0.339627366
rs35850753	17	7578671	cg23632979	17	7531125	0.04423704	0.339627366
rs35850753	17	7578671	cg06931941	17	7486770	0.044106739	0.34105318
rs35850753	17	7578671	cg00053373	17	7554827	-0.042412832	0.359935419
rs35850753	17	7578671	cg08460590	17	7495881	-0.042282531	0.361414511
rs35850753	17	7578671	cg04198562	17	7490230	-0.04189163	0.365874535
rs35850753	17	7578671	cg01330991	17	7648108	0.041631029	0.368866819
rs35850753	17	7578671	cg12041429	17	7585875	0.041631029	0.368866819
rs35850753	17	7578671	cg06482989	17	7494095	0.041240127	0.373383604
rs35850753	17	7578671	cg14824495	17	7492801	0.041109826	0.374896751
rs35850753	17	7578671	cg08119584	17	7589976	0.040849225	0.377934359
rs35850753	17	7578671	cg08581937	17	7555132	-0.040197722	0.385594244
rs35850753	17	7578671	cg11874331	17	7486562	0.040197722	0.385594244
rs35850753	17	7578671	cg07760161	17	7588378	0.040067422	0.387137489
rs35850753	17	7578671	cg18311066	17	7591671	-0.03967652	0.391789707
rs35850753	17	7578671	cg09663193	17	7486821	0.038243214	0.409135036
rs35850753	17	7578671	cg02385411	17	7674264	-0.037591711	0.417167524
rs35850753	17	7578671	cg17461511	17	7591552	-0.037461411	0.418785071
rs35850753	17	7578671	cg09474692	17	7531375	-0.037070509	0.423659731
rs35850753	17	7578671	cg21808406	17	7482475	-0.036288706	0.433507717
rs35850753	17	7578671	cg13074687	17	7517258	0.035767503	0.440145703
rs35850753	17	7578671	cg12699156	17	7517016	0.035116001	0.448524341
rs35850753	17	7578671	cg04891959	17	7531338	0.034594798	0.455291746
rs35850753	17	7578671	cg25896754	17	7590877	0.033682694	0.467271441
rs35850753	17	7578671	cg04009932	17	7590639	0.033552394	0.468996934
rs35850753	17	7578671	cg12356155	17	7673324	0.033031192	0.475933918
rs35850753	17	7578671	cg16203911	17	7590731	-0.033031192	0.475933918
rs35850753	17	7578671	cg18233810	17	7604985	0.032509989	0.482926597
rs35850753	17	7578671	cg10081138	17	7604803	0.032119088	0.488207391
rs35850753	17	7578671	cg24946791	17	7534937	-0.032119088	0.488207391
rs35850753	17	7578671	cg09625173	17	7518844	0.031728186	0.493519071
rs35850753	17	7578671	cg06236279	17	7617286	0.031337284	0.498861437
rs35850753	17	7578671	cg19432033	17	7517220	0.031337284	0.498861437
rs35850753	17	7578671	cg27576755	17	7608757	-0.03029488	0.513256196
rs35850753	17	7578671	cg26160217	17	7486928	-0.029773678	0.520533591
rs35850753	17	7578671	cg17887478	17	7486551	0.029643377	0.522361185
rs35850753	17	7578671	cg16673904	17	7521996	-0.029252475	0.527863621
rs35850753	17	7578671	cg02948125	17	7560317	0.028991874	0.531548202
rs35850753	17	7578671	cg10677590	17	7657449	0.028991874	0.531548202
rs35850753	17	7578671	cg11035992	17	7657473	-0.028861574	0.533395354
rs35850753	17	7578671	cg16991298	17	7559144	0.02807977	0.544545749
rs35850753	17	7578671	cg14692950	17	7644073	-0.027819169	0.548288036
rs35850753	17	7578671	cg00807143	17	7590720	-0.026385863	0.569094113
rs35850753	17	7578671	cg16920407	17	7605206	-0.026385863	0.569094113
rs35850753	17	7578671	cg05737601	17	7551277	-0.025994962	0.574833036
rs35850753	17	7578671	cg07725036	17	7531119	-0.025994962	0.574833036
rs35850753	17	7578671	cg05348746	17	7590645	-0.025213158	0.586392021
rs35850753	17	7578671	cg24806732	17	7608859	-0.024170754	0.601968906
rs35850753	17	7578671	cg22175811	17	7590052	-0.023910153	0.60589199
rs35850753	17	7578671	cg07421515	17	7481193	-0.022476846	0.627669627
rs35850753	17	7578671	cg25758952	17	7487593	-0.022085945	0.633666607
rs35850753	17	7578671	cg10473369	17	7492352	0.021434442	0.643714928
rs35850753	17	7578671	cg07488259	17	7493710	-0.02104354	0.649775389
rs35850753	17	7578671	cg18202751	17	7620996	0.020652639	0.655859036
rs35850753	17	7578671	cg05652328	17	7479977	0.020522338	0.657892011
rs35850753	17	7578671	cg06784830	17	7486996	-0.020131436	0.664006036
rs35850753	17	7578671	cg00103783	17	7487249	-0.020001136	0.666049034
rs35850753	17	7578671	cg12263130	17	7667626	0.020001136	0.666049034
rs35850753	17	7578671	cg18198734	17	7579263	-0.020001136	0.666049034
rs35850753	17	7578671	cg20548716	17	7531197	0.020001136	0.666049034
rs35850753	17	7578671	cg20347916	17	7621118	0.019870835	0.668094505
rs35850753	17	7578671	cg27413385	17	7515425	0.019870835	0.668094505
rs35850753	17	7578671	cg25185710	17	7553999	0.019089032	0.680418522
rs35850753	17	7578671	cg23125328	17	7531394	-0.01856783	0.688682306
rs35850753	17	7578671	cg19178081	17	7558889	0.017395125	0.707410497
rs35850753	17	7578671	cg02166782	17	7591564	-0.017004223	0.713693328
rs35850753	17	7578671	cg18900669	17	7482456	0.016743622	0.717892692
rs35850753	17	7578671	cg14421980	17	7656829	0.01635272	0.724207663
rs35850753	17	7578671	cg21734090	17	7620948	-0.01635272	0.724207663
rs35850753	17	7578671	cg06365412	17	7580709	0.016092119	0.728428091
rs35850753	17	7578671	cg12608169	17	7656702	0.015961818	0.730541397
rs35850753	17	7578671	cg26904212	17	7517697	-0.015961818	0.730541397
rs35850753	17	7578671	cg06587969	17	7591899	-0.015831518	0.732656743
rs35850753	17	7578671	cg01029592	17	7493453	0.015570917	0.736893499
rs35850753	17	7578671	cg05913233	17	7518500	-0.014789113	0.749651209
rs35850753	17	7578671	cg15206330	17	7591591	-0.014789113	0.749651209
rs35850753	17	7578671	cg27439292	17	7670719	0.014658813	0.751784255
rs35850753	17	7578671	cg04030905	17	7531377	-0.014528512	0.753919194
rs35850753	17	7578671	cg02319103	17	7517617	0.014267911	0.758194685
rs35850753	17	7578671	cg07711099	17	7621575	-0.014267911	0.758194685
rs35850753	17	7578671	cg10043101	17	7554140	-0.01387701	0.764621728
rs35850753	17	7578671	cg23178322	17	7518094	-0.01387701	0.764621728
rs35850753	17	7578671	cg01933235	17	7517691	0.013355807	0.773216247
rs35850753	17	7578671	cg24580146	17	7644241	-0.013225507	0.775369261
rs35850753	17	7578671	cg02705837	17	7554666	0.012183102	0.792654068
rs35850753	17	7578671	cg06317056	17	7589344	0.012052802	0.79482202
rs35850753	17	7578671	cg24128434	17	7623131	-0.011270998	0.807862361
rs35850753	17	7578671	cg25664403	17	7536658	-0.010880097	0.814402787
rs35850753	17	7578671	cg01479396	17	7529693	0.010489195	0.820956135
rs35850753	17	7578671	cg05479194	17	7591838	-0.010358894	0.823143379
rs35850753	17	7578671	cg01620719	17	7589251	-0.010228594	0.825331994
rs35850753	17	7578671	cg26019259	17	7677608	0.009577091	0.83629505
rs35850753	17	7578671	cg02842899	17	7589491	-0.008013484	0.862732115
rs35850753	17	7578671	cg19986200	17	7660449	0.007752883	0.867154068
rs35850753	17	7578671	cg06200013	17	7554513	-0.007622583	0.869366608
rs35850753	17	7578671	cg11882478	17	7531248	-0.007622583	0.869366608
rs35850753	17	7578671	cg10608799	17	7496086	0.007492282	0.871580168
rs35850753	17	7578671	cg02855142	17	7591947	0.007361982	0.873794731
rs35850753	17	7578671	cg00688810	17	7517138	-0.007231681	0.87601028
rs35850753	17	7578671	cg02087342	17	7579047	0.007231681	0.87601028
rs35850753	17	7578671	cg16547235	17	7480059	-0.00697108	0.880444268
rs35850753	17	7578671	cg22028542	17	7554163	-0.00697108	0.880444268
rs35850753	17	7578671	cg04740558	17	7660494	0.006710479	0.884881996
rs35850753	17	7578671	cg12615880	17	7493572	0.006710479	0.884881996
rs35850753	17	7578671	cg13483263	17	7493150	0.006580178	0.887102219
rs35850753	17	7578671	cg09566763	17	7553760	-0.006449878	0.889323326
rs35850753	17	7578671	cg13658231	17	7608095	-0.006449878	0.889323326
rs35850753	17	7578671	cg02045224	17	7591618	-0.006319577	0.891545299
rs35850753	17	7578671	cg07991600	17	7589380	-0.006189277	0.893768121
rs35850753	17	7578671	cg02346901	17	7480149	-0.006058976	0.895991775
rs35850753	17	7578671	cg03554817	17	7554357	0.005798375	0.90044151
rs35850753	17	7578671	cg25000600	17	7621545	-0.005668074	0.902667557
rs35850753	17	7578671	cg23616383	17	7487132	0.005407473	0.907121922
rs35850753	17	7578671	cg21327235	17	7643798	-0.005146872	0.911579201
rs35850753	17	7578671	cg02925799	17	7487430	0.004495369	0.922734234
rs35850753	17	7578671	cg22949073	17	7572391	-0.004365069	0.92496713
rs35850753	17	7578671	cg13749033	17	7480826	-0.004104468	0.929434674
rs35850753	17	7578671	cg13530203	17	7486961	0.003974167	0.931669287
rs35850753	17	7578671	cg13098960	17	7494151	-0.003713566	0.936140105
rs35850753	17	7578671	cg23846713	17	7590995	-0.003322664	0.942850054
rs35850753	17	7578671	cg10509001	17	7553872	-0.002801462	0.951802862
rs35850753	17	7578671	cg27401891	17	7611315	-0.001889358	0.967484201
rs35850753	17	7578671	cg05491376	17	7641552	0.001498456	0.974208967
rs35850753	17	7578671	cg23290969	17	7589272	0.001498456	0.974208967
rs35850753	17	7578671	cg01191395	17	7530998	0.001237855	0.978693189
rs35850753	17	7578671	cg13258039	17	7608697	-0.001237855	0.978693189
rs35850753	17	7578671	cg20682573	17	7559041	-0.000456052	0.992149318
rs35850753	17	7578671	cg03027800	17	7651017	0.000195451	0.996635378
rs35850753	17	7578671	cg08691422	17	7588787	6.52E-05	0.998878456

## Sheet: rs35850753-histone
SNPid	SNPchromosome	SNPpos	featureName	featureChromosome	featurePositionStart	SpearmanRho	pValue
rs35850753	17	7578671	peak10142	17	6616079	-0.086931468	0.070743572
rs35850753	17	7578671	peak10143	17	6655658	0.075393291	0.11722506
rs35850753	17	7578671	peak10144	17	6757107	0.0328759	0.495042882
rs35850753	17	7578671	peak10145	17	6796796	-0.119017082	0.013203216
rs35850753	17	7578671	peak10146	17	6816187	0.032243672	0.503379472
rs35850753	17	7578671	peak10147	17	6839433	-0.043623791	0.365169096
rs35850753	17	7578671	peak10148	17	6912951	-0.102263017	0.033388161
rs35850753	17	7578671	peak10149	17	6938350	-0.027501955	0.568181116
rs35850753	17	7578671	peak10150	17	6945163	-0.000158057	0.997383382
rs35850753	17	7578671	peak10151	17	6948897	-0.089302326	0.06336804
rs35850753	17	7578671	peak10152	17	7077693	0.000632229	0.989533808
rs35850753	17	7578671	peak10153	17	7105586	0.115539823	0.016157485
rs35850753	17	7578671	peak10154	17	7135324	-0.020231323	0.674622357
rs35850753	17	7578671	peak10155	17	7151992	0.05105248	0.289165644
rs35850753	17	7578671	peak10156	17	7183500	0.009483433	0.844006402
rs35850753	17	7578671	peak10157	17	7199476	-0.008377032	0.86201171
rs35850753	17	7578671	peak10158	17	7209801	0.027660012	0.565958578
rs35850753	17	7578671	peak10159	17	7215927	-0.019599095	0.684235027
rs35850753	17	7578671	peak10160	17	7230510	0.027027784	0.574873573
rs35850753	17	7578671	peak10161	17	7252379	-0.101156617	0.035356787
rs35850753	17	7578671	peak10162	17	7284140	0.010905948	0.820976811
rs35850753	17	7578671	peak10163	17	7286683	0.001422515	0.976453802
rs35850753	17	7578671	peak10164	17	7295859	0.050894423	0.290663186
rs35850753	17	7578671	peak10165	17	7305027	-0.029714756	0.537450544
rs35850753	17	7578671	peak10166	17	7338689	-0.012644577	0.79303889
rs35850753	17	7578671	peak10167	17	7348310	-0.00395143	0.934657388
rs35850753	17	7578671	peak10168	17	7357920	0.00964149	0.841440605
rs35850753	17	7578671	peak10169	17	7379217	-0.107320848	0.025535754
rs35850753	17	7578671	peak10170	17	7451573	0.009483433	0.844006402
rs35850753	17	7578671	peak10171	17	7459130	-0.021969953	0.648462885
rs35850753	17	7578671	peak10172	17	7473162	0.04820745	0.316916597
rs35850753	17	7578671	peak10173	17	7482031	-0.056584483	0.24000081
rs35850753	17	7578671	peak10174	17	7512625	-0.032717843	0.497120114
rs35850753	17	7578671	peak10175	17	7529405	0.086457296	0.072299781
rs35850753	17	7578671	peak10176	17	7537894	0.009325376	0.846573849
rs35850753	17	7578671	peak10177	17	7553455	0.014067092	0.770374159
rs35850753	17	7578671	peak10178	17	7587480	-0.058165055	0.227100926
rs35850753	17	7578671	peak10179	17	7606087	0.016754065	0.728105959
rs35850753	17	7578671	peak10180	17	7618289	0.018018522	0.70848788
rs35850753	17	7578671	peak10181	17	7736323	0.047891336	0.320104086
rs35850753	17	7578671	peak10182	17	7753375	-0.020547438	0.669835672
rs35850753	17	7578671	peak10183	17	7758380	-0.019441037	0.686646257
rs35850753	17	7578671	peak10184	17	7783170	-0.080135007	0.095840876
rs35850753	17	7578671	peak10185	17	7800375	0.046310764	0.336353689
rs35850753	17	7578671	peak10186	17	7816584	-0.061010085	0.205137996
rs35850753	17	7578671	peak10187	17	7824904	-0.049629965	0.302830509
rs35850753	17	7578671	peak10188	17	7831635	-0.018966866	0.69389895
rs35850753	17	7578671	peak10189	17	7890414	-0.006322289	0.895633454
rs35850753	17	7578671	peak10190	17	7919195	-0.049471908	0.304374817
rs35850753	17	7578671	peak10191	17	7961192	0.096572958	0.044596486
rs35850753	17	7578671	peak10192	17	7982644	-0.012960692	0.787986462
rs35850753	17	7578671	peak10193	17	8013133	0.038091789	0.429157317
rs35850753	17	7578671	peak10194	17	8019807	0.024182754	0.615787613
rs35850753	17	7578671	peak10195	17	8040504	-0.052000823	0.280289278
rs35850753	17	7578671	peak10196	17	8049557	-0.009325376	0.846573849
rs35850753	17	7578671	peak10197	17	8075200	-0.023708582	0.622728747
rs35850753	17	7578671	peak10198	17	8088910	-0.033350072	0.488839015
rs35850753	17	7578671	peak10199	17	8102451	0.033982301	0.480632566
rs35850753	17	7578671	peak10200	17	8113442	0.018492694	0.70117969
rs35850753	17	7578671	peak10201	17	8123328	0.010115662	0.833753382
rs35850753	17	7578671	peak10202	17	8129585	-0.014225149	0.767867488
rs35850753	17	7578671	peak10203	17	8149555	0.080135007	0.095840876
rs35850753	17	7578671	peak10204	17	8191196	-0.01533155	0.750389838
rs35850753	17	7578671	peak10205	17	8197731	-0.033033958	0.49297028
rs35850753	17	7578671	peak10206	17	8229572	-0.026553612	0.581602954
rs35850753	17	7578671	peak10207	17	8241274	-0.064961515	0.177247184
rs35850753	17	7578671	peak10208	17	8278504	0.048997736	0.309038955
rs35850753	17	7578671	peak10209	17	8338419	-0.093569871	0.051690172
rs35850753	17	7578671	peak10210	17	8530817	0.032559786	0.499201965
