# Supplementary material for: Low-frequency variation in TP53 has large effects on head circumference and intracranial volume
Source: Nat Commun. 2019 Jan 21;10:357. doi: 10.1038/s41467-018-07863-x (PMC6341110; doi:10.1038/s41467-018-07863-x)
Supplement: Supplementary file 23 — Supplementary Data 20 [file 41467_2018_7863_MOESM23_ESM.xlsx]

## Sheet: rs35850753
UKBiobank PheWAS for rs35850753 (multiple testing threshold p < 2.26E-06)
varName	varType	N	β	lower	upper	p	β*	lower*	upper*	p*	resType	description	Trait of interest	Cat1_ID	Cat1_Title	Cat2_ID	Cat2_Title	Cat3_ID	Cat3_Title	Notes
20015	CONTINUOUS	331642	0.016	0.011	0.021	2.1E-10	0.016	0.011	0.021	2.5E-10	LINEAR	Sitting height	YES	100000	UK Biobank Assessment Centre	100006	Physical measures	100008	Anthropometry
20004#1357	CAT-MUL	299221/33410(332631)	0.061	0.039	0.082	5.3E-08	0.060	0.038	0.082	6.3E-08	LOGISTIC-BINARY	Operation code	NO	100000	UK Biobank Assessment Centre	100071	Verbal interview	100076	Operations
50	CONTINUOUS	331944	0.012	0.008	0.017	8.5E-08	0.012	0.008	0.017	1.2E-07	LINEAR	Standing height	YES	100000	UK Biobank Assessment Centre	100006	Physical measures	100008	Anthropometry
41202#S025	CAT-MUL	332616/56(332672)	0.417	0.230	0.570	1.0E-06	0.418	0.231	0.572	9.7E-07	LOGISTIC-BINARY	Diagnoses - main ICD10	NO	100091	Health-related outcomes	2000	Hospital in-patient	2002	Diagnoses	Fracture of tooth
Adjusting for age, sex and genotype chip
*Adjusting for age, sex, genotype chip and 10 principal components

## Sheet: rs78378222
UKBiobank PheWAS for rs78378222 (multiple testing threshold p < 2.26E-06)
varName	varType	N	β	lower	upper	p	β*	lower*	upper*	p*	resType	description	Trait of interest	Cat1_ID	Cat1_Title	Cat2_ID	Cat2_Title	Cat3_ID	Cat3_Title	Notes
20015	CONTINUOUS	332501	0.019	0.014	0.024	1.3E-13	0.018	0.013	0.023	1.0E-12	LINEAR	Sitting height	YES	100000	UK Biobank Assessment Centre	100006	Physical measures	100008	Anthropometry
50	CONTINUOUS	332803	0.015	0.010	0.019	2.5E-10	0.013	0.009	0.018	5.6E-09	LINEAR	Standing height	YES	100000	UK Biobank Assessment Centre	100006	Physical measures	100008	Anthropometry
20004#1357	CAT-MUL	299987/33510(333497)	0.065	0.044	0.086	2.3E-09	0.065	0.044	0.086	2.3E-09	LOGISTIC-BINARY	Operation code	NO	100000	UK Biobank Assessment Centre	100071	Verbal interview	100076	Operations	hysterectomy
Adjusting for age, sex and genotype chip
*Adjusting for age, sex, genotype chip and 10 principal components
